# Supplementary material for: Chiral crotyl geminal bis(silane): a useful reagent for asymmetric Sakurai allylation by selective desilylation-enabled chirality transfer
Source: Royal Society of Chemistry journal article supplement (doi:10.1039/c7cc00632b), 2017-01-01

# Chiral Crotyl Geminal Bis(silane): A Useful Reagent for Asymmetric Sakurai Allylation by Selective Desilylation-Enabled Chirality Transfer

Zhiwen Chu,<sup>a</sup> Kai Wang,<sup>a</sup> Lu Gao,<sup>a</sup> and Zhenlei Song<sup>\*a, b</sup>

*Key Laboratory of Drug-Targeting of Education Ministry and Department of Medicinal Chemistry, West China School of Pharmacy, State Key Laboratory of Biotherapy, West China Hospital, Sichuan University, Chengdu 610041, P. R. China.*

E-mail: zhenleisong@scu.edu.cn

## Supporting Information

### Table of Contents

|                                                                      |                  |
|----------------------------------------------------------------------|------------------|
| <b>1. General Methods</b> .....                                      | <b>S2</b>        |
| <b>2. General Procedure and Spectral Data</b> .....                  | <b>S2-S33</b>    |
| 2.1. Synthesis of (±)-1a to (±)-1e .....                             | <b>S2-S6</b>     |
| 2.2. Synthesis of (S)-1a.....                                        | <b>S7-S9</b>     |
| 2.3. Synthesis of 2a-2j .....                                        | <b>S9-S16</b>    |
| 2.4. Synthesis of 3a-3j .....                                        | <b>S16-S22</b>   |
| 2.5 One-pot Synthesis of 3k-3m.....                                  | <b>S22-S24</b>   |
| 2.6. Functionalization of 3d.....                                    | <b>S24-S25</b>   |
| 2.7. Determining the absolute configuration of (S)-1a.....           | <b>S25-S32</b>   |
| <b>3. <sup>1</sup>H and <sup>13</sup>C NMR Spectral Copies</b> ..... | <b>S33-S119</b>  |
| <b>4. HPLC copies</b> .....                                          | <b>S120-S146</b> |

## 1. General Methods

Commercial reagents were used without any purification. All reactions were performed using common anhydrous, inert atmosphere techniques. Reactions were monitored by thin-layer chromatography (TLC) using aluminium-backed silica gel plates (HSGF-254). TLC spots were viewed under ultraviolet light and by heating the plate after treatment with a staining solution of  $\text{KMnO}_4$  stains,  $\text{H}_3\text{PO}_4 \cdot 12\text{MoO}_3/\text{EtOH}$  stains,  $\text{H}_2\text{SO}_4$  (conc.)/anisaldehyde/EtOH stains. Product purifications were performing using Silica Gel (200-300 mesh) for column chromatography.  $^1\text{H}$  NMR spectra were recorded at 400 MHz (Varian) and 600 MHz (Agilent), and  $^{13}\text{C}$  NMR spectra were recorded at 100 MHz (Varian) and 150 MHz (Agilent) using  $\text{CDCl}_3$  (except where noted) with TMS or residual solvent as standard. Infrared spectra were obtained using KCl plates on a VECTOR22. High-resolution mass spectral analyses performed on Waters Q-TOF. In each case, enantiomeric ratio was determined by HPLC analysis on a chiral column in comparison with racemates, using a Daicel Chiralpak IA Column ( $250 \times 4.6$  mm) or Chiralpak IC Column ( $250 \times 4.6$  mm), Chiralpak OD-H Column ( $250 \times 4.6$  mm). UV detection was monitored at 220 nm or 254 nm. Optical rotation was examined in  $\text{CHCl}_3$  solution at 20 °C. Pentane, Toluene,  $\text{CH}_2\text{Cl}_2$ ,  $\text{CHCl}_3$ , and  $\text{Et}_3\text{N}$  were distilled from  $\text{CaH}_2$ .  $\text{Et}_2\text{O}$  and THF were distilled from sodium.

## 2. Experimental Procedures and Spectral Data of Products

### 2.1. Synthesis of ( $\pm$ )-1a to ( $\pm$ )1e

#### Preparation of ( $\pm$ )-S1

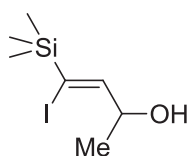

( $\pm$ )-S1

To a solution of **4** (10.0 g, 64.1 mmol) in  $\text{Et}_2\text{O}$  (500 mL) was added Red-Al (19.0 mL, 96.2 mmol) dropwise at 0 °C. After stirring for 8 h,  $\text{I}_2$  (24.4 g, 96.2 mmol) was added at  $-20$  °C. The resultant mixture was stirred at room temperature overnight before quenching with sat aq  $\text{NH}_4\text{Cl}$  (200 mL)

and extracted with Et<sub>2</sub>O (3 × 200 mL). The combined extracts were washed with sat aq Na<sub>2</sub>S<sub>2</sub>O<sub>3</sub> (20 mL). The organic layers were dried over anhydrous Na<sub>2</sub>SO<sub>4</sub>, filtered and concentrated under reduced pressure. Purification of the crude residue via silica gel flash column chromatography (gradient eluent: 0-20% of EtOAc/petroleum ether) afforded (±)-**S1** (15.7 g, 86%) as a yellow liquid. <sup>1</sup>H NMR (400 MHz, CDCl<sub>3</sub>) δ 6.19 (d, *J* = 6.4 Hz, 1H), 4.56 (q, *J* = 6.4 Hz, 1H), 2.40 (s, 1H), 1.26 (t, *J* = 6.4 Hz, 3H), 0.17 (s, 9H); <sup>13</sup>C NMR (150 MHz, CDCl<sub>3</sub>) δ 150.2, 111.9, 74.0, 21.4, 1.6; IR (liquid film) cm<sup>-1</sup> 3326m, 2963m, 1249s, 1062m, 888s, 838s, 754m; HRMS (ESI-TOF, *m/z*) calcd for C<sub>7</sub>H<sub>15</sub>IOSi (M+Na)<sup>+</sup>: 292.9839, found 292.9838.

### Preparation of 5

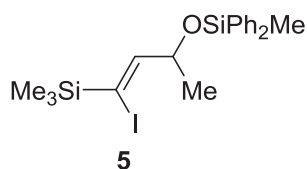

To a solution of (±)-**S1** (15.7 g, 55.1 mmol), Et<sub>3</sub>N (23.0 mL, 165.3 mmol) and DMAP (673 mg, 5.5 mmol) in CH<sub>2</sub>Cl<sub>2</sub> (200 mL) was added Ph<sub>2</sub>MeSiCl (10.3 mL, 60.6 mmol) at 0°C. After stirring for 1 h at room temperature, the reaction was quenched with sat aq NaHCO<sub>3</sub> (50 mL) and extracted with CH<sub>2</sub>Cl<sub>2</sub> (3 × 50 mL). The combined organic layers were dried over anhydrous Na<sub>2</sub>SO<sub>4</sub>, filtered and concentrated under reduced pressure. Purification of the crude residue via silica gel flash column chromatography (gradient eluent: 0-1.0% of EtOAc/petroleum ether) afforded **5** (26.4 g, 99%) as a colorless liquid. <sup>1</sup>H NMR (400 MHz, CDCl<sub>3</sub>) δ 7.62 (d, *J* = 7.2 Hz, 4H), 7.37-7.43 (m, 6H), 6.21 (d, *J* = 6.8 Hz, 1H), 4.71 (q, *J* = 6.4 Hz, 1H), 1.29 (d, *J* = 6.4 Hz, 3H), 0.69 (s, 3H), 0.12 (s, 9H); <sup>13</sup>C NMR (100 MHz, CDCl<sub>3</sub>) δ 150.8, 136.3, 136.2, 134.4, 134.0, 129.8, 129.6, 127.8, 127.7, 109.6, 76.1, 22.3, -1.7, -2.4; IR (liquid film) cm<sup>-1</sup> 2959w, 1428m, 1250m, 1119s, 1076s, 839m, 731s; HRMS (ESI-TOF, *m/z*) calcd for C<sub>20</sub>H<sub>27</sub>IOSi<sub>2</sub> (M+Na)<sup>+</sup>: 489.0537, found 489.0539.

### Preparation of 6

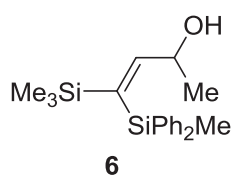

To a solution of **5** (2.0 g, 4.3 mmol) in dry THF (50 mL) was added *t*-BuLi (6.6 mL of 1.3 M solution in pentane, 8.6 mmol) at -78°C under argon atmosphere. The reaction was allowed to proceed for 30 min at -78°C. The the pale yellow solution was warmed to room temperature and stirred for another 30 min before quenching with sat aq NH<sub>4</sub>Cl (60 mL) and extraction with ether (3 × 60 mL). The combined organic layers were dried over anhydrous NaSO<sub>4</sub>, filtered and concentrated under vacuo. Purification of the crude residue via silica gel flash column chromatography (gradient eluent: 0-20% of EtOAc/petroleum ether) afforded **6** (1.38 g, 95%) as a colorless liquid. <sup>1</sup>H NMR (400 MHz, CDCl<sub>3</sub>) δ 7.55 (m, 4H), 7.39 (m, 6H), 6.72 (d, *J* = 8.8 Hz, 1H), 4.20 (dq, *J*<sub>1</sub> = 8.8 Hz, *J*<sub>2</sub> = 6.0 Hz, 1H), 1.28 (s, 1H), 0.94 (d, *J* = 6.0 Hz, 3H), 0.71 (s, 3H), 0.10 (s, 9H); <sup>13</sup>C NMR (150 MHz, CDCl<sub>3</sub>) δ 161.9, 138.3, 137.9, 137.7, 134.8, 134.7, 129.3, 129.2, 128.0, 127.9, 68.9, 21.5, 0.52, 0.15; IR (liquid film) cm<sup>-1</sup> 2960m, 1569w, 1428s, 1248s, 1109s, 1052m, 940w, 909s, 858s, 792s; HRMS (ESI-TOF, *m/z*) calcd for C<sub>20</sub>H<sub>28</sub>OSi<sub>2</sub> (M+Na)<sup>+</sup>: 363.1571, found 363.1570.

### Preparation of (±)-1a

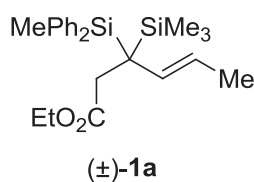

A solution of **6** (2.0 g, 5.88 mmol), 1,1,1-triethoxyethane (4.31 mL, 23.5 mmol), propionic acid (4.8 μL, 0.0647 mmol) in dry toluene (30 mL) was refluxed at 140 °C for 15 h in seal tube. The mixture was concentrated in vacuo at 50 °C to remove toluene. Purification of the crude residue via silica gel flash column chromatography (gradient eluent: 0-0.5% of EtOAc/petroleum ether) afforded pure (±)-**1a** (2.29 g, 95%) as a colorless liquid. <sup>1</sup>H NMR (400 MHz, CDCl<sub>3</sub>) δ 7.69 (d, *J* = 6.8 Hz, 2H), 7.63 (d, *J* = 6.8 Hz, 2H), 7.36 (m, 1H), 7.33 (d, *J* = 6.8 Hz, 4H), 5.8 (d, *J* = 15.6 Hz, 1H), 5.28 (dq, *J*<sub>1</sub> = 6.4 Hz, *J*<sub>2</sub> = 15.6 Hz, 2H), 3.86 (dq, *J*<sub>1</sub> = 7.2 Hz, *J*<sub>2</sub> = 3.6 Hz, 2H), 2.74 (d, *J* = 14.8 Hz, 1H), 2.64 (d, *J* = 14.8 Hz, 1H), 1.83 (d, *J* = 6.4 Hz, 3H), 1.12 (t, *J* = 7.2 Hz, 3H), 0.81 (s, 3H), -0.08 (s, 9H); <sup>13</sup>C NMR (150 MHz, CDCl<sub>3</sub>) δ 172.9, 137.2, 136.6, 135.6, 135.5, 135.4, 132.2, 128.9, 128.8, 127.4, 127.4, 127.3, 120.6, 60.0, 36.3, 24.7, 18.7, 13.9, -0.7, -2.8; IR (liquid film) cm<sup>-1</sup> 2927m, 2955m,

1738s, 1428m, 1368w, 1251s, 1176s, 1105m, 840s; HRMS (ESI-TOF, m/z) calcd for C<sub>24</sub>H<sub>36</sub>O<sub>2</sub>Si<sub>2</sub> (M+Na)<sup>+</sup>:433.1990, found 433.1996.

### Preparation of (±)-1b

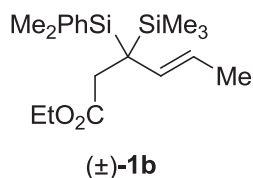

(±)-1b: Using the same procedure as that used for (±)-1a afforded (±)-1b (120 mg, 96%) as a colorless liquid. <sup>1</sup>H NMR (400 MHz, CDCl<sub>3</sub>) δ 7.49 (d, *J* = 6.0 Hz, 2H), 7.33 (m, 1H), 7.32 (d, *J* = 6.0 Hz, 2H), 5.59 (d, *J* = 15.6 Hz, 1H), 5.03 (dq, *J*<sub>1</sub> = 6.0 Hz, *J*<sub>2</sub> = 15.6 Hz, 1H), 4.04 (q, *J* = 7.2 Hz, 2H), 2.45 (s, 2H), 1.72 (d, *J* = 6.0 Hz, 3H), 1.22 (t, *J* = 7.2 Hz, 3H), 0.40 (s, 3H), 0.38 (s, 3H), 0.01 (s, 9H); <sup>13</sup>C NMR (150 MHz, CDCl<sub>3</sub>) δ 173.3, 138.1, 135.0, 132.5, 128.8, 127.2, 119.8, 60.1, 36.3, 24.1, 18.7, 14.1, -0.7, -1.9, -2.6; IR (liquid film) cm<sup>-1</sup> 2955w, 2917w, 1738m, 1428w, 1368w, 1249m, 1174m, 1109m, 1036m, 989m, 836s, 823s; HRMS (ESI-TOF, m/z) calcd for C<sub>14</sub>H<sub>30</sub>O<sub>2</sub>Si<sub>2</sub>(M+Na)<sup>+</sup>: 371.1833, found 371.1826.

### Preparation of (±)-1c

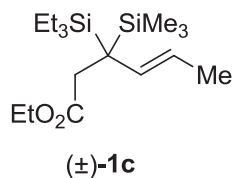

(±)-1c: Using the same procedure as that used for (±)-1a afforded (±)-1c (150 mg, 95%) as a colorless liquid. <sup>1</sup>H NMR (400 MHz, CDCl<sub>3</sub>) δ 5.54 (d, *J* = 15.2 Hz, 1H), 5.06 (dq, *J*<sub>1</sub> = 15.2 Hz, *J*<sub>2</sub> = 6.0 Hz, 1H), 4.08 (q, *J*<sub>1</sub> = 4.4 Hz, *J*<sub>2</sub> = 7.2 Hz, 2H), 2.61 (d, *J* = 16.0 Hz, 1H), 2.57 (d, *J* = 16.0 Hz, 1H), 1.68 (d, *J* = 7.2 Hz, 3H), 1.25 (t, *J* = 7.2 Hz, 3H), 0.97 (t, *J* = 8.0 Hz, 9H), 0.69 (q, *J* = 8.0 Hz, 6H), 0.06 (s, 9H); <sup>13</sup>C NMR (150 MHz, CDCl<sub>3</sub>) δ 173.5, 133.3, 118.5, 60.1, 36.2, 25.0, 18.6, 14.1, 8.5, 3.9, -0.4; IR (liquid film) cm<sup>-1</sup> 2953m, 2878m, 1739s, 1368w, 1336w, 1247s, 1164s, 1037m, 1009m, 991m, 836s; HRMS (ESI-TOF, m/z) calcd for C<sub>17</sub>H<sub>36</sub>O<sub>2</sub>Si<sub>2</sub>(M+Na)<sup>+</sup>:351.2146, found 351.2146.

### Preparation of (±)-1d

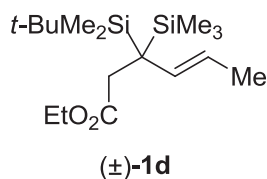

**(±)-1d:** Using the same procedure as that used for **(±)-1a** afforded **(±)-1d** (250 mg, 95%) as a colorless liquid. <sup>1</sup>H NMR (400 MHz, CDCl<sub>3</sub>) δ 5.68 (d, *J* = 15.2 Hz, 1H), 5.00 (dq, *J*<sub>1</sub> = 6.4 Hz, *J*<sub>2</sub> = 15.2 Hz, 1H), 4.10 (q, *J* = 7.2 Hz, 2H), 2.78 (d, *J* = 15.2 Hz, 1H), 1.69 (d, *J* = 6.4 Hz, 3H), 1.26 (t, *J* = 7.2 Hz, 3H), 0.88 (s, 9H), 0.13 (s, 3H), 0.10 (s, 9H), 0.02 (s, 3H); <sup>13</sup>C NMR (100 MHz, CDCl<sub>3</sub>) δ 173.7, 134.6, 117.2, 60.1, 36.9, 28.4, 25.9, 20.8, 18.6, 14.1, 0.04, -4.0, -4.3; IR (liquid film) cm<sup>-1</sup> 2932m, 2856m, 1738s, 1474w, 1250s, 1161s, 1068m, 1038w, 986m, 819s, 798s; HRMS (ESI-TOF, *m/z*) calcd for C<sub>13</sub>H<sub>30</sub>OSi<sub>2</sub> (M+Na)<sup>+</sup>: 351.2146, found 351.2144.

### Preparation of (±)-1e

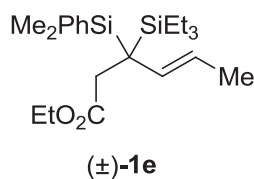

**(±)-1e:** Using the same procedure as that used for **(±)-1a** afforded **(±)-1e** (50mg, 90%) as a colorless liquid. <sup>1</sup>H NMR (400 MHz, CDCl<sub>3</sub>) δ 7.49 (d, *J* = 6.8, 2H), 7.32 (m, 1H), 7.31 (d, *J* = 6.8 Hz, 2H), 5.64 (d, *J* = 15.6 Hz, 2H), 5.00 (dq, *J*<sub>1</sub> = 6.4 Hz, *J*<sub>2</sub> = 15.6 Hz, 1H), 4.04 (q, *J* = 7.2 Hz, 2H), 2.54 (d, *J* = 15.6 Hz, 1H), 2.48 (d, *J* = 15.6 Hz, 1H), 1.71 (d, *J* = 6.4 Hz, 3H), 1.22 (d, *J* = 7.2 Hz, 3H), 0.91 (t, *J* = 8.0 Hz, 9H), 0.61 (q, *J* = 8.0 Hz, 6H), 0.41 (s, 6H); <sup>13</sup>C NMR (150 MHz, CDCl<sub>3</sub>) δ 173.4, 138.5, 135.1, 133.1, 128.7, 127.1, 119.0, 60.1, 36.4, 25.5, 18.6, 14.1, 8.5, 4.0, -1.3, -2.1; IR (liquid film) cm<sup>-1</sup> 2954s, 2877s, 1740s, 1427w, 1248m, 1174s, 1109m, 1037m, 822s, 773m; HRMS (ESI-TOF, *m/z*) calcd for C<sub>22</sub>H<sub>38</sub>O<sub>2</sub>Si<sub>2</sub> (M+Na)<sup>+</sup>: 413.2303, found 413.2303.

## 2.2. Synthesis of (S)-1a

### Preparation of (S)-4

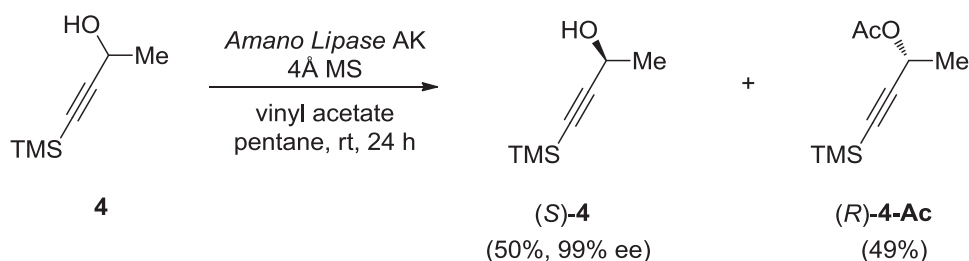

To a 0.5 M pentane solution of racemic **4**<sup>1</sup> (20.0 g, 140.8 mmol) was added molecular sieve (2.0 g), Amano lipase AK (4.0 g) and vinyl acetate (52 mL, 562.1 mmol). The resulting suspension was stirred at room temperature for 24 h under argon atmosphere. The mixture was filtered via celite, and the resultant filtration was concentrated and purified by silica gel flash chromatography (gradient eluent: 0-20% of EtOAc/petroleum ether) to provide (*S*)-**4** (10.0 g, 50%) as a yellow liquid and (*R*)-**4-Ac** (12.9 g, 49%) as a yellow liquid. (*S*)-**4**:  $[\alpha]_{\text{D}}^{20} = -17.5$  ( $c = 1.0$  in  $\text{CHCl}_3$ ); {literature reported  $[\alpha]_{\text{D}}^{20} = -22.3$  ( $c = 1.0$  in  $\text{CHCl}_3$ )<sup>1</sup>}; <sup>1</sup>H NMR (400 MHz,  $\text{CDCl}_3$ )  $\delta$  4.51 (dq,  $J_1 = 5.2$  Hz,  $J_2 = 6.8$  Hz, 1H), 2.05 (d,  $J = 5.2$  Hz, 1H), 1.43 (d,  $J = 6.8$  Hz, 3H), 0.16 (s, 9H); IR (liquid film)  $\text{cm}^{-1}$  3019w, 1372w, 1251w, 1214s, 1114w, 942w, 942w, 866m, 844m; (*R*)-**4-Ac**:  $[\alpha]_{\text{D}}^{20} = +104.3$  ( $c = 1.0$  in  $\text{CHCl}_3$ ). {literature reported  $[\alpha]_{\text{D}}^{20} = +119$  ( $c = 1.0$  in  $\text{CHCl}_3$ )<sup>1</sup>}

### Preparation of (*S*)-5, (*S*)-6, and (*S*)-1a

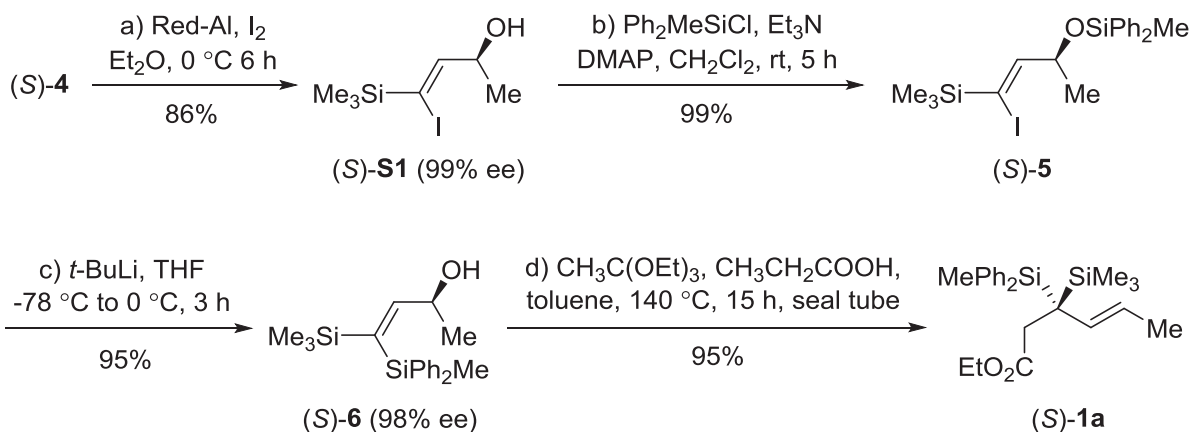

(*S*)-**S1**: Using the same procedure as that used for ( $\pm$ )-**S1** afforded (*S*)-**S1** (16.0 g, 86%) as a yellow liquid. The enantiomeric ratio was determined to be 99.5:0.5 by HPLC analysis on Chiralpak IC column (0.66% 2-propanol/*n*-hexane, 1.0 mL/min), UV 220 nm,  $t_{\text{minor}} = 10.58$  min,  $t_{\text{major}} = 11.99$  min;  $[\alpha]_{\text{D}}^{20} = -21.3$  ( $c = 1.0$  in  $\text{CHCl}_3$ ).

1. S. E. Denmark, N. S. Werner, *J. Am. Chem. Soc.*, **2010**, *132*, 3612.

(*S*)-**5**: Using the same procedure as that used for racemic **5** afforded (*S*)-**5** (28.3 g, 99%) as a colorless liquid.  $[\alpha]_{\text{D}}^{20} = +6.4$  ( $c = 1.0$  in  $\text{CHCl}_3$ ).

(*S*)-**6**: Using the same procedure as that used for racemic **6** afforded (*S*)-**S6** (19.6 g, 95%) as a colorless liquid. The enantiomeric ratio was determined to be 98.5:1.5 by HPLC analysis on Chiralpak IC column (1.0% 2-propanol/*n*-hexane, 1.0 mL/min), UV 220 nm,  $t_{\text{minor}} = 6.38$  min,  $t_{\text{major}} = 5.84$  min;  $[\alpha]_{\text{D}}^{20} = -3.7$  ( $c = 1.0$  in  $\text{CHCl}_3$ ).

(*S*)-**1a**: Using the same procedure as that used for ( $\pm$ )-**1a** afforded (*S*)-**1a** (22.4 g, 95%) as a colorless liquid.  $[\alpha]_{\text{D}}^{20} = -13.7$  ( $c = 1.0$  in  $\text{CHCl}_3$ ). The enantiomeric ratio was determined by (*S*)-**S2** as below.

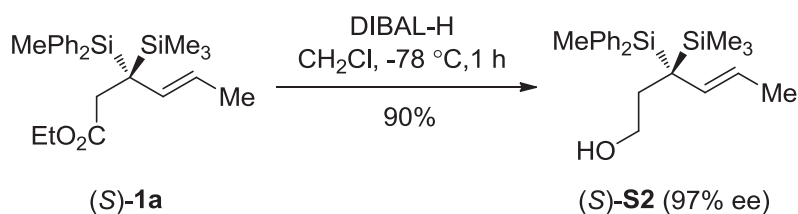

To a solution of (*S*)-**1a** (100 mg, 0.243 mmol) in anhydrous  $\text{CH}_2\text{Cl}_2$  (2 mL) was added DIBAL-H (0.486 mL of 1.0 M solution in *n*-hexane, 0.486 mmol) at  $-78$  °C. After stirring for 1 h at  $-78$  °C, the reaction was quenched with sat aq  $\text{NaHCO}_3$  (2 mL) and extracted with  $\text{CH}_2\text{Cl}_2$  ( $3 \times 2$  mL). The combined organic layers were dried over anhydrous  $\text{Na}_2\text{SO}_4$ , filtered and concentrated under reduced pressure. Purification of the crude residue via silica gel flash column chromatography (gradient eluent: 0-20% of EtOAc/petroleum ether) afforded (*S*)-**S2** (80.5 mg, 90% yield) as a colorless oil. The enantiomeric ratio was determined to be 98.6:1.4 by HPLC analysis on Chiralpak OD column (1% 2-propanol/*n*-hexane, 1.0 mL/min), UV 220 nm,  $t_{\text{minor}} = 20.48$ ,  $t_{\text{major}} = 10.04$  min;  $[\alpha]_{\text{D}}^{20} = -11.2$  ( $c = 1.0$  in  $\text{CHCl}_3$ );  $^1\text{H}$  NMR (400 MHz,  $\text{CDCl}_3$ )  $\delta$  7.68 (d,  $J = 7.2$  Hz, 2H), 7.59 (d,  $J = 7.2$  Hz, 2H), 7.36 (s, 1H), 7.35 (d,  $J = 7.2$  Hz, 2H), 7.32 (s, 1H), 7.31 (d,  $J = 7.2$  Hz, 2H), 5.96 (d,  $J = 15.6$  Hz, 1H), 5.25 (dq,  $J_1 = 15.6$  Hz,  $J_2 = 6.0$  Hz, 1H), 3.62 (t,  $J = 8.0$  Hz, 2H), 2.13 (dt,  $J_1 = 16.0$  Hz,  $J_2 = 8.0$  Hz, 1H), 2.00 (dt,  $J_1 = 16.0$  Hz,  $J_2 = 8.0$  Hz, 1H), 1.85 (d,  $J = 6.0$  Hz, 3H), 0.72 (s, 3H), 0.16 (s, 9H);  $^{13}\text{C}$  NMR (150 MHz,  $\text{CDCl}_3$ )  $\delta$  137.4, 137.0, 135.4, 131.6, 129.1, 128.9, 127.6, 127.5, 120.6, 60.7, 34.1, 24.4, 18.7, -0.9, -3.1; IR (liquid film)  $\text{cm}^{-1}$  2917m, 1428m, 1251m, 1103m,



1021m, 856s, 786s; HRMS (ESI-TOF, m/z) calcd for C<sub>22</sub>H<sub>32</sub>OSi<sub>2</sub> (M+Na)<sup>+</sup>:391.1884, found 391.1884.

### 2.3. Synthesis of 2a-2j

#### Preparation of 2a

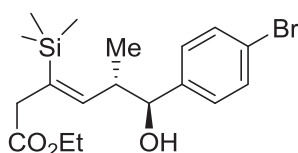

**2a**

**2a:** To a solution of (*S*)-**1a** (20.5 mg, 0.05 mmol) and *p*-Br-C<sub>6</sub>H<sub>4</sub>CHO (9.25 mg, 0.05 mmol) in anhydrous CHCl<sub>3</sub> (0.5 mL) was added Ph<sub>3</sub>C<sup>+</sup>B(C<sub>6</sub>F<sub>5</sub>)<sub>4</sub><sup>-</sup> (0.9 mg, 0.001 mmol) at room temperature. After stirring for 2 h, the reaction was quenched with sat aq NaHCO<sub>3</sub> (2 mL) and extract with CH<sub>2</sub>Cl<sub>2</sub> (3 × 2 mL). The combined organic phases were dried over anhydrous Na<sub>2</sub>SO<sub>4</sub>, filtered and concentrated under reduced pressure. Purification of the crude residue via silica gel flash column chromatography (gradient eluent: 0-20% of EtOAc/petroleum ether) afforded **2a** (14.9 mg, 75%) as a yellow oil. The enantiomeric ratio was determined to be 98.5:1.5 by HPLC analysis on Chiralpak IC column (1.0% 2-propanol/*n*-hexane, 1.0 mL/min), UV 220 nm, *t*<sub>minor</sub> = 20.69 min, *t*<sub>major</sub> = 40.87 min; [α]<sub>D</sub><sup>20</sup> = +47.8 (*c* = 1.0 in CHCl<sub>3</sub>). <sup>1</sup>H NMR (400 MHz, CDCl<sub>3</sub>) δ 7.46 (d, *J* = 8.4 Hz, 2H), 7.23 (d, *J* = 8.4 Hz, 2H), 5.90 (d, *J* = 10.8 Hz, 1H), 4.23 (d, *J* = 8.4 Hz, 1H), 4.13 (q, *J* = 7.2 Hz, 2H), 3.19 (d, *J* = 16.0 Hz, 1H), 3.09 (d, *J* = 16.0 Hz, 1H), 2.72 (s, 1H), 2.61 (ddd, *J*<sub>1</sub> = 6.8 Hz, *J*<sub>2</sub> = 8.4 Hz, *J*<sub>3</sub> = 10.8 Hz, 1H), 1.26 (t, *J* = 7.2 Hz, 3H), 0.79 (d, *J* = 6.8 Hz, 3H), 0.19 (s, 9H); <sup>13</sup>C NMR (100 MHz, CDCl<sub>3</sub>) δ 172.8, 148.7, 141.0, 136.4, 131.1, 128.8, 121.3, 77.7, 60.7, 44.9, 43.5, 16.6, 14.1, 0.16; IR (liquid film) cm<sup>-1</sup> 3468w, 2962m, 1730s, 1486w, 1249m, 1178w, 1097w, 1011m, 838s; HRMS (ESI-TOF, m/z) calcd for C<sub>19</sub>H<sub>27</sub>F<sub>3</sub>O<sub>3</sub>Si (M+Na)<sup>+</sup>: 421.0805, found 421.0805.

#### Preparation of S3

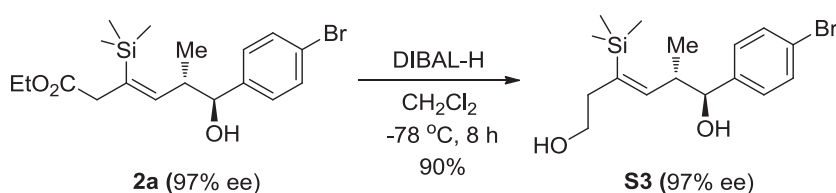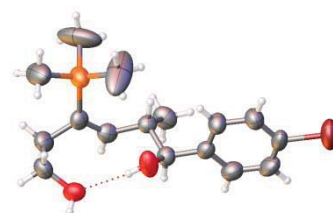

To a solution of **2a** (100 mg, 0.251 mmol) in anhydrous CH<sub>2</sub>Cl<sub>2</sub> (2 mL) was added DIBAL-H (0.502 mL of 1.0 M solution in *n*-hexane, 0.502 mmol) at -78 °C. After stirring for 8 h at -78 °C, the reaction was quenched with sat aq NaHCO<sub>3</sub> (2 mL) and extracted with CH<sub>2</sub>Cl<sub>2</sub> (3 × 2 mL). The combined organic layers were dried over anhydrous Na<sub>2</sub>SO<sub>4</sub>, filtered and concentrated under reduced pressure. Purification of the crude residue via silica gel flash column chromatography (gradient eluent: 0-20% of EtOAc/petroleum ether) afforded **S3** (80.5 mg, 90% yield) as a white solid. The enantiomeric ratio was determined to be 97.8:2.1 by HPLC analysis on Chiralpak OD column (5% 2-propanol/*n*-hexane, 1.0 mL/min), UV 220 nm, *t*<sub>minor</sub> = 12.54, *t*<sub>major</sub> = 10.02 min; m.p.: 94-97 °C; [α]<sub>D</sub><sup>20</sup> = -113.0 (*c* = 1.0 in CHCl<sub>3</sub>); <sup>1</sup>H NMR (400 MHz, CDCl<sub>3</sub>) δ 7.44 (d, *J* = 8.0 Hz, 2H), 7.16 (d, *J* = 8.0 Hz, 2H), 5.84 (d, *J* = 10.8 Hz, 1H), 4.14 (d, *J* = 8.8 Hz, 1H), 3.43 (dt, *J*<sub>1</sub> = 4.0 Hz, *J*<sub>2</sub> = 5.2 Hz, 1H), 3.41 (dt, *J*<sub>1</sub> = 4.0 Hz, *J*<sub>2</sub> = 5.2 Hz, 1H), 3.23 (s, 1H), 2.71 (s, 1H), 2.51-2.61 (m, 1H), 2.45 (dt, *J*<sub>1</sub> = 12.8 Hz, *J*<sub>2</sub> = 4.0 Hz, 1H), 2.25 (dt, *J*<sub>1</sub> = 12.8 Hz, *J*<sub>2</sub> = 4.0 Hz, 1H), 0.76 (d, *J* = 6.8 Hz, 1H), 0.18 (s, 9H); <sup>13</sup>C NMR (100 MHz, CDCl<sub>3</sub>) δ 148.3, 141.8, 137.9, 131.3, 128.6, 121.4, 77.8, 60.9, 44.8, 41.2, 16.8, 0.58; IR (liquid film) cm<sup>-1</sup> 3054w, 2924w, 2370w, 1419w, 1265s, 1010w, 895w; HRMS (ESI-TOF, *m/z*) calcd for C<sub>16</sub>H<sub>25</sub>BrO<sub>2</sub>Si (M+Na)<sup>+</sup>: 379.0699, found 379.0698. Crystals suitable for X-ray diffraction studies (CCDC1528458) were obtained by slow solvents evaporation of a solution of **S3** (25 mg) in a mixture of CH<sub>2</sub>Cl<sub>2</sub> (0.2 mL) and *n*-hexane (1.0 mL) at 4 °C overnight.

### Preparation of 2b

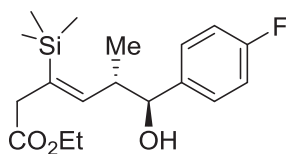

**2b**

**2b**: Using the same procedure as that used for **2a** afforded **2b** (10.0 mg, 59%) as a colorless liquid. The enantiomeric ratio was determined to be 98:2 by HPLC analysis on Chiralpak IC column (0.67% 2-propanol/*n*-hexane, 1.0 mL/min), UV 220 nm, *t*<sub>minor</sub> = 38.16 min, *t*<sub>major</sub> = 42.89 min; [α]<sub>D</sub><sup>20</sup> = -53.6 (*c* = 1.0 in CHCl<sub>3</sub>); <sup>1</sup>H NMR (400 MHz, CDCl<sub>3</sub>) δ 7.32 (d, *J* = 6.8 Hz, 1H), 7.30 (d, *J* = 6.8 Hz, 1H), 7.04 (d, *J* = 8.4 Hz, 1H), 7.02 (d, *J* = 8.4 Hz, 1H), 5.92 (d, *J* = 10.8 Hz, 1H), 4.26 (d, *J* = 8.8 Hz, 1H), 4.14 (q, *J* = 7.2 Hz, 2H), 3.20 (d, *J* = 16.0 Hz, 1H), 2.66 (s, 1H), 2.61 (m, 1H), 1.26 (t,

$J = 7.2$  Hz, 3H), 0.79 (q,  $J = 6.4$  Hz, 3H);  $^{13}\text{C}$  NMR (150 MHz,  $\text{CDCl}_3$ )  $\delta$  172.9, 162.3 (CH, d,  $J_{\text{C-F}} = 244.1$  Hz), 149.0, 137.7, 136.8, 128.7 (CH, d,  $J_{\text{C-F}} = 6.5$  Hz), 135.1 (CH, d,  $J_{\text{C-F}} = 6.5$  Hz), 77.9, 60.8, 45.3, 43.6, 16.7, 14.2, 0.28; IR (liquid film)  $\text{cm}^{-1}$  2918m, 1731m, 1510m, 1220s, 1029m, 837s, 774s; HRMS (ESI-TOF,  $m/z$ ) calcd for  $\text{C}_{18}\text{H}_{27}\text{FO}_3\text{Si}$  ( $\text{M}+\text{Na}$ ) $^+$ : 361.1606, found 361.1609.

### Preparation of 2c

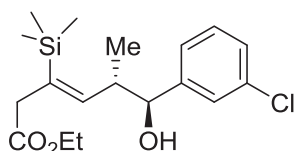

**2c**

**2c:** Using the same procedure as that used for **2a** afforded **2c** (12.4 mg, 70%) as a colorless liquid. The enantiomeric ratio was determined to be 98.4:1.6 by HPLC analysis on Chiralpak IC column (1.0% 2-propanol/*n*-hexane, 1.0 mL/min), UV 220 nm,  $t_{\text{minor}} = 4.12$  min,  $t_{\text{major}} = 3.57$  min;  $[\alpha]_{\text{D}}^{20} = -44.0$  ( $c = 1.0$  in  $\text{CHCl}_3$ );  $^1\text{H}$  NMR (400 MHz,  $\text{CDCl}_3$ )  $\delta$  7.34 (m, 1H), 7.23-7.26 (m, 3H), 5.90 (d,  $J = 10.4$  Hz, 1H), 4.24 (d,  $J = 8.4$  Hz, 1H), 4.14 (q,  $J = 6.8$  Hz, 2H), 3.19 (d,  $J = 16.0$  Hz, 1H), 3.10 (d,  $J = 16.0$  Hz, 1H), 2.69 (s, 1H), 2.63 (ddd,  $J_1 = 10.4$  Hz,  $J_2 = 8.4$  Hz,  $J_3 = 6.8$  Hz, 1H), 1.26 (t,  $J = 6.8$  Hz, 3H), 0.81 (d,  $J = 6.4$  Hz, 3H), 0.20 (s, 9H);  $^{13}\text{C}$  NMR (150 MHz,  $\text{CDCl}_3$ )  $\delta$  172.9, 148.7, 144.1, 144.0, 137.0, 134.1, 129.5, 127.8, 127.3, 125.4, 77.9, 60.8, 45.1, 43.6, 16.7, 14.2, 0.27, 0.25; IR (liquid film)  $\text{cm}^{-1}$  2917w, 1728m, 1249s, 1178m, 1078m, 1028s, 879m, 836s, 786m; HRMS (ESI-TOF,  $m/z$ ) calcd for  $\text{C}_{18}\text{H}_{27}\text{ClO}_3\text{Si}$  ( $\text{M}+\text{Na}$ ) $^+$ : 411.1574, found 411.1575.

### Preparation of 2d

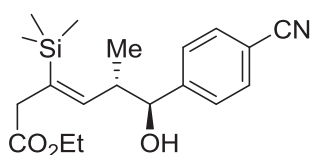

**2d**

**2d:** Using the same procedure as that used for **2a** afforded **2d** (15.5 mg, 90%) as a colorless liquid. The enantiomeric ratio was determined to be 98:2 by HPLC analysis on Chiralpak OD-H column (5.0% 2-propanol/*n*-hexane, 1.0 mL/min), UV 220 nm,  $t_{\text{minor}} = 20.64$  min,  $t_{\text{major}} = 11.22$  min;  $[\alpha]_{\text{D}}^{20} = -87.2$  ( $c = 1.0$  in  $\text{CHCl}_3$ );  $^1\text{H}$  NMR (400 MHz,  $\text{CDCl}_3$ )  $\delta$  7.63 (d,  $J = 8.0$  Hz, 2H), 7.46 (d,  $J = 8.0$

Hz, 2H), 5.89 (d,  $J = 10.4$  Hz, 1H), 4.32 (d,  $J = 8.4$  Hz, 1H), 4.14 (q,  $J = 7.2$  Hz, 2H), 3.20 (d,  $J = 16.0$  Hz, 1H), 3.08 (d,  $J = 16.0$  Hz, 1H), 2.88 (s, 1H), 2.60 (ddd,  $J_1 = 7.2$  Hz,  $J_2 = 8.4$  Hz,  $J_3 = 10.4$  Hz, 1H), 1.26 (t,  $J = 7.2$  Hz, 3H), 0.82 (t,  $J = 7.2$  Hz, 3H), 0.18 (s, 9H);  $^{13}\text{C}$  NMR (100 MHz,  $\text{CDCl}_3$ )  $\delta$  172.9, 148.1, 147.4, 137.5, 132.0, 127.9, 118.8, 111.4, 77.8, 60.9, 45.1, 43.5, 16.5, 14.2, 0.2; IR (liquid film)  $\text{cm}^{-1}$  2918m, 2228w, 1320w, 1249s, 1176m, 1028m, 836s, 760m; HRMS (ESI-TOF,  $m/z$ ) calcd for  $\text{C}_{19}\text{H}_{27}\text{NO}_3\text{Si}$  ( $\text{M}+\text{Na}$ ) $^+$ : 368.1652, found 368.1651.

### Preparation of 2e

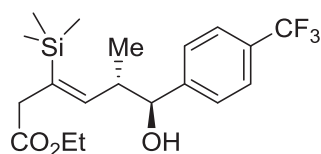

**2e**

**2e:** Using the same procedure as that used for **2a** afforded **2e** (13.6 mg, 70%) as a colorless liquid. The enantiomeric ratio was determined to be 97:3 by HPLC analysis on Chiralpak IC column (1.0% 2-propanol/*n*-hexane, 1.0 mL/min), UV 220 nm,  $t_{\text{minor}} = 16.02$  min,  $t_{\text{major}} = 18.07$  min;  $[\alpha]_{\text{D}}^{20} = -48.4$  ( $c = 1.0$  in  $\text{CHCl}_3$ );  $^1\text{H}$  NMR (400 MHz,  $\text{CDCl}_3$ )  $\delta$  7.60 (d,  $J = 8.0$  Hz, 2H), 7.46 (d,  $J = 8.0$  Hz, 2H), 5.92 (d,  $J = 10.8$  Hz, 1H), 4.33 (d,  $J = 8.4$  Hz, 1H), 4.14 (q,  $J = 7.2$  Hz, 2H), 3.20 (d,  $J = 16.0$  Hz, 1H), 3.10 (d,  $J = 16.0$  Hz, 1H), 2.81 (s, 1H), 2.65 (ddd,  $J_1 = 6.8$  Hz,  $J_2 = 8.4$  Hz,  $J_3 = 10.8$  Hz, 1H), 1.26 (t,  $J = 7.2$  Hz, 3H), 0.82 (t,  $J = 6.8$  Hz, 3H), 0.20 (s, 9H);  $^{13}\text{C}$  NMR (100 MHz,  $\text{CDCl}_3$ )  $\delta$  172.9, 148.5, 146.0, 137.2, 127.5, 125.1 (CF, d,  $J_{\text{C-F}} = 3.7$  Hz), 125.0, 77.9, 60.8, 45.2, 43.6, 16.6, 14.2, 0.21; IR (liquid film)  $\text{cm}^{-1}$  2963w, 1724s, 1325s, 1265m, 1160m, 1125m, 1103m, 840s; HRMS (ESI-TOF,  $m/z$ ) calcd for  $\text{C}_{19}\text{H}_{27}\text{F}_3\text{O}_3\text{Si}$  ( $\text{M}+\text{Na}$ ) $^+$ : 377.1310, found 377.1306.

### Preparation of 2g

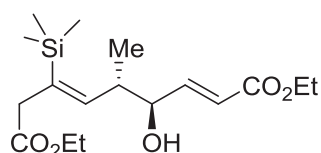

**2g**

**2g:** Using the same procedure as that used for **2a** afforded **2g** (12.3 mg, 72%) as a colorless liquid. The enantiomeric ratio was determined to be 98:2 by HPLC analysis on Chiralpak IC column (5.0%

2-propanol/*n*-hexane, 1.0 mL/min), UV 220 nm,  $t_{\text{minor}} = 19.43$  min,  $t_{\text{major}} = 22.39$  min;  $[\alpha]_{\text{D}}^{20} = -3.2$  ( $c = 1.0$  in  $\text{CHCl}_3$ );  $^1\text{H NMR}$  (400 MHz,  $\text{CDCl}_3$ )  $\delta$  6.95 (dd,  $J_1 = 15.6$  Hz,  $J_2 = 5.6$ , 1H), 6.11 (d,  $J = 15.6$  Hz, 1H), 5.83 (d,  $J = 10.8$  Hz, 1H), 4.20 (q,  $J = 7.2$  Hz, 2H), 4.13 (q,  $J = 7.2$  Hz, 2H), 3.95 (dd,  $J_1 = 6.4$  Hz,  $J_2 = 6.8$  Hz, 1H), 1.29 (t,  $J = 7.2$  Hz, 3H), 1.25 (t,  $J = 7.2$  Hz, 3H), 1.01 (d,  $J = 6.8$  Hz, 3H), 0.15 (s, 9H);  $^{13}\text{C NMR}$  (100 MHz,  $\text{CDCl}_3$ )  $\delta$  172.9, 166.4, 147.9, 147.2, 137.2, 122.0, 74.5, 60.8, 60.4, 43.5, 43.2, 16.4, 14.2, 14.1, 0.19; IR (liquid film)  $\text{cm}^{-1}$  1717w, 1264s, 1177w, 841w; HRMS (ESI-TOF,  $m/z$ ) calcd for  $\text{C}_{17}\text{H}_{30}\text{O}_5\text{Si}$  ( $\text{M}+\text{Na}$ ) $^+$ : 365.1755, found 365.1755.

### Preparation of 2h

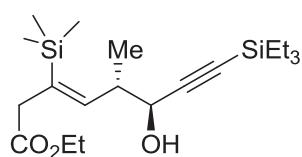

**2h**

**2h**: Using the same procedure as that used for **2a** afforded **2h** (13.6 mg, 71%) as a colorless liquid.  $[\alpha]_{\text{D}}^{20} = +1.2$  ( $c = 1.0$  in  $\text{CHCl}_3$ ); The enantiomeric ratio was determined using **2h-NO<sub>2</sub>** (see below)  $^1\text{H NMR}$  (400 MHz,  $\text{CDCl}_3$ )  $\delta$  5.84 (d,  $J = 10.8$ , 1H), 4.16 (d,  $J = 7.2$  Hz, 1H), 4.11 (q,  $J = 7.2$  Hz, 2H), 3.11 (d,  $J = 16.4$  Hz, 1H), 3.06 (d,  $J = 16.4$  Hz, 1H), 2.67-2.72 (m, 1H), 2.17 (s, 1H), 1.23 (t,  $J = 7.2$  Hz, 3H), 1.10 (d,  $J = 6.4$  Hz, 3H), 0.99 (d,  $J = 8.0$  Hz, 9H), 0.61 (q,  $J = 8.0$  Hz, 6H), 0.18 (s, 9H);  $^{13}\text{C NMR}$  (150 MHz,  $\text{CDCl}_3$ )  $\delta$  172.8, 147.7, 135.8, 105.9, 87.9, 66.7, 60.6, 43.7, 43.2, 29.7, 15.8, 14.2, 7.4, 4.3, 0.18; IR (liquid film)  $\text{cm}^{-1}$  2916m, 1264m, 1250m, 1178m, 1019m, 839s; HRMS (ESI-TOF,  $m/z$ ) calcd for  $\text{C}_{20}\text{H}_{38}\text{O}_3\text{Si}_2$  ( $\text{M}+\text{Na}$ ) $^+$ : 405.2252, found 405.2252.

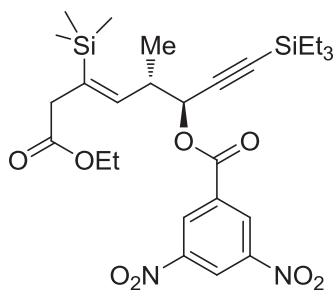

**2h-NO<sub>2</sub>**

To a solution of **2h** (50 mg, 0.131 mmol),  $\text{Et}_3\text{N}$  (55  $\mu\text{L}$ , 0.39 mmol) and DMAP (1.60 mg, 0.013 mmol) in  $\text{CH}_2\text{Cl}_2$  (1.5 mL) was added 3, 5-dinitrobenzoyl chloride (36.2 mg, 0.157 mmol) at  $0^\circ\text{C}$ .

After stirring for 2h at room temperature, the reaction was quenched with sat aq NaHCO<sub>3</sub> (2 mL) and extracted with CH<sub>2</sub>Cl<sub>2</sub> (3 × 2 mL). The combined organic layers were dried over anhydrous Na<sub>2</sub>SO<sub>4</sub>, filtered and concentrated under reduced pressure. Purification of the crude residue via silica gel flash column chromatography (gradient eluent: 0-1.0% of EtOAc/petroleum ether) afforded **2h-NO<sub>2</sub>** (69.1 mg, 90%) as a colorless liquid. The enantiomeric ratio was determined to be 94:6 by HPLC analysis on ChiralpakODcolumn (0.67% 2-propanol/*n*-hexane, 1.0 mL/min), UV 220 nm, *t*<sub>minor</sub> = 18.02 min, *t*<sub>major</sub> = 19.71 min; [α]<sub>D</sub><sup>20</sup> = -23.7 (*c* = 1.0 in CHCl<sub>3</sub>); <sup>1</sup>H NMR (400 MHz, CDCl<sub>3</sub>) δ 9.22 (m, 1H), 9.15 (d, *J* = 1.2 Hz, 2H), 5.83 (d, *J* = 10.8 Hz, 1H), 5.55 (d, *J* = 8.0 Hz, 1H), 3.97 (q, *J* = 7.2 Hz, 2H), 3.05 (d, *J* = 16.0 Hz, 1H), 2.98-3.07 (m, 1H), 2.99 (d, *J* = 16.0 Hz, 1H), 1.23 (d, *J* = 6.8 Hz, 3H), 1.17 (t, *J* = 6.8 Hz, 3H), 1.00 (t, *J* = 7.6 Hz, 9H), 0.63 (q, *J* = 7.6 Hz, 6H), 0.19 (s, 9H); <sup>13</sup>C NMR (150 MHz, CDCl<sub>3</sub>) δ 172.3, 161.4, 148.5, 146.0, 135.8, 133.7, 129.8, 122.3, 100.9, 90.9, 70.1, 60.3, 43.5, 41.5, 16.6, 14.1, 7.4, 4.1, 0.07; IR (liquid film) cm<sup>-1</sup> 2957m, 1733s, 1548s, 1344s, 1270m, 1164m, 840m; HRMS (ESI-TOF, *m/z*) calcd for C<sub>27</sub>H<sub>40</sub>N<sub>2</sub>O<sub>8</sub>Si<sub>2</sub> (M+Na)<sup>+</sup>: 599.2215, found 599.2214.

### Preparation of 2i

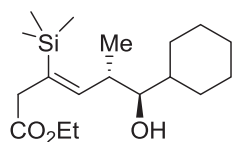

**2i**

**2i**: Using the same procedure as that used for **2a** afforded **2i** (9.8 mg, 60%) as a colorless liquid. [α]<sub>D</sub><sup>20</sup> = -12.4 (*c* = 1.0 in CHCl<sub>3</sub>); The enantiomeric ratio was determined using **2i-NO<sub>2</sub>**. <sup>1</sup>H NMR (400 MHz, CDCl<sub>3</sub>) δ 5.85 (d, *J* = 10.4, 1H), 4.11 (q, *J* = 7.2 Hz, 2H), 3.14 (d, *J* = 16.0 Hz, 1H), 3.11 (m, 1H), 3.04 (d, *J* = 16.0 Hz, 1H), 2.59 (ddd, *J*<sub>1</sub> = 6.8 Hz, *J*<sub>2</sub> = 10.4 Hz, *J*<sub>3</sub> = 6.4 Hz, 1H), 1.41-1.66 (m, 11H), 1.22 (t, *J* = 7.2 Hz, 3H), 0.92 (d, *J* = 6.4 Hz, 3H), 0.16 (s, 9H); <sup>13</sup>C NMR (150 MHz, CDCl<sub>3</sub>) δ 173.0, 150.4, 135.3, 78.6, 60.7, 43.6, 39.8, 39.0, 30.9, 26.9, 26.5, 26.4, 24.5, 16.6, 14.2, 0.24; IR (liquid film) cm<sup>-1</sup> 2924s, 2851m, 1731s, 1450m, 1319m, 1249s, 1166m, 1098m, 838s, 760m; HRMS (ESI-TOF, *m/z*) calcd for C<sub>18</sub>H<sub>34</sub>O<sub>3</sub>Si (M+Na)<sup>+</sup>: 349.2169, found 349.2168.

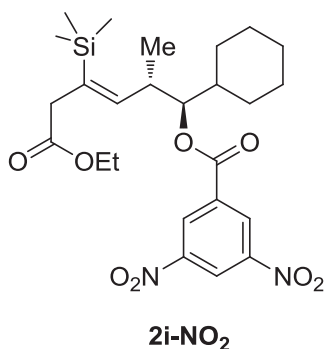

**2i-NO<sub>2</sub>**: Using the same procedure as that used for **2h-NO<sub>2</sub>** afforded **2i-NO<sub>2</sub>** (58.8 mg, 90%) as a colorless liquid. The enantiomeric ratio was determined to be 97:3 by HPLC analysis on Chiralpak IC column (5.0% 2-propanol/*n*-hexane, 1.0 mL/min), UV 220 nm,  $t_{\text{minor}} = 11.68$  min,  $t_{\text{major}} = 9.94$  min;  $[\alpha]_{\text{D}}^{20} = -15.5$  ( $c = 1.0$  in  $\text{CHCl}_3$ );  $^1\text{H NMR}$  (400 MHz,  $\text{CDCl}_3$ )  $\delta$  9.20 (dd,  $J_1 = 2.0$  Hz,  $J_2 = 2.0$  Hz, 1H), 9.09 (d,  $J = 2.0$  Hz, 2H), 5.86 (d,  $J = 10.4$  Hz, 1H), 5.05 (dd,  $J_1 = 2.8$  Hz,  $J_2 = 9.2$  Hz, 1H), 3.84 (q,  $J = 7.2$  Hz, 2H), 2.98 (d,  $J = 16.0$  Hz, 1H), 2.92-2.98 (m, 1H), 2.86 (d,  $J = 16.0$  Hz, 1H), 1.59-2.01 (m, 10H), 1.11 (t,  $J = 7.2$  Hz, 3H), 1.04 (t,  $J = 6.8$  Hz, 3H), 0.12 (s, 9H);  $^{13}\text{C NMR}$  (150 MHz,  $\text{CDCl}_3$ )  $\delta$  172.4, 162.4, 148.4, 148.1, 134.4, 133.7, 129.7, 122.0, 83.2, 60.1, 43.2, 38.7, 38.1, 30.7, 26.2, 26.1, 26.0, 17.3, 14.1, 0.14; IR (liquid film)  $\text{cm}^{-1}$  2919s, 1731s, 1547s, 1344s, 1171m, 839m; HRMS (ESI-TOF,  $m/z$ ) calcd for  $\text{C}_{25}\text{H}_{36}\text{N}_2\text{O}_8\text{Si}$  ( $\text{M}+\text{Na}$ )<sup>+</sup>:543.2133, found 543.2128.

### Preparation of 2j

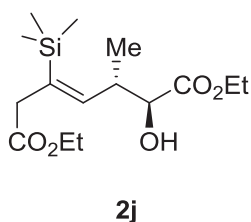

**2j**: Using the same procedure as that used for **2a** afforded **2j** (9.5 mg, 60%) as a colorless liquid.  $[\alpha]_{\text{D}}^{20} = +1.4$  ( $c = 1.0$  in  $\text{CHCl}_3$ ). The enantiomeric ratio was determined using **2j-NO<sub>2</sub>**.  $^1\text{H NMR}$  (400 MHz,  $\text{CDCl}_3$ )  $\delta$  6.00 (d,  $J = 10.8$  Hz, 1H), 4.26-4.32 (m, 1H), 4.05-4.19 (m, 4H), 3.07 (d,  $J = 16.0$  Hz, 1H), 3.03 (d,  $J = 16.0$  Hz, 1H), 2.86 (s, 1H), 2.79-2.85 (m, 1H), 1.29 (t,  $J = 7.2$  Hz, 3H), 1.24 (t,  $J = 7.2$  Hz, 3H), 1.09 (d,  $J = 6.8$  Hz, 3H), 0.17 (s, 9H);  $^{13}\text{C NMR}$  (150 MHz,  $\text{CDCl}_3$ )  $\delta$  173.9, 172.7, 145.6, 134.6, 61.7, 60.4, 43.7, 40.1, 17.2, 14.2, 14.1, 0.11; IR (liquid film)  $\text{cm}^{-1}$  2918w, 1728m, 1265m, 1249m, 1177m, 1026m, 839s; HRMS (ESI-TOF,  $m/z$ ) calcd for  $\text{C}_{15}\text{H}_{28}\text{O}_5\text{Si}$  ( $\text{M}+\text{Na}$ )<sup>+</sup>: 339.1598, found 339.1597.

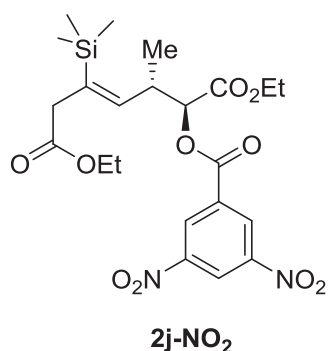

**2j-NO<sub>2</sub>**: Using the same procedure as that used for **2i-NO<sub>2</sub>** afforded **2j-NO<sub>2</sub>** (58.9 mg, 92%) as a colorless liquid. The enantiomeric ratio was determined to be 98:2 by HPLC analysis on Chiralpak IC column (0.67% 2-propanol/*n*-hexane, 1.0 mL/min), UV 220 nm,  $t_{\text{minor}} = 46.75$  min,  $t_{\text{major}} = 40.73$  min;  $[\alpha]_{\text{D}}^{20} = -4.0$  ( $c = 1.0$  in  $\text{CHCl}_3$ );  $^1\text{H NMR}$  (400 MHz,  $\text{CDCl}_3$ )  $\delta$  9.23 (d,  $J = 2.0$ , 1H), 9.17 (d,  $J = 2.0$  Hz, 1H), 5.98 (d,  $J = 10.8$  Hz, 1H), 5.08 (d,  $J = 7.2$  Hz, 1H), 4.26 (dq,  $J_1 = 7.2$  Hz,  $J_2 = 3.2$  Hz, 2H), 4.03 (q,  $J = 6.8$  Hz, 2H), 3.16-3.24 (m, 1H), 3.12 (d,  $J = 16.0$  Hz, 1H), 3.07 (d,  $J = 16.0$  Hz, 1H), 1.31 (t,  $J = 7.2$  Hz, 3H), 1.23 (d,  $J = 10.8$  Hz, 3H), 1.20 (t,  $J = 6.8$  Hz, 3H), 0.22 (s, 9H);  $^{13}\text{C NMR}$  (100 MHz,  $\text{CDCl}_3$ )  $\delta$  175.1, 172.4, 168.3, 162.1, 148.6, 144.9, 135.8, 133.1, 129.8, 122.6, 77.9, 61.9, 60.4, 43.5, 38.2, 17.2, 14.1, 0.1; IR (liquid film)  $\text{cm}^{-1}$  2917m, 2849w, 1737w, 1549w, 1215m, 754s; HRMS (ESI-TOF,  $m/z$ ) calcd for  $\text{C}_{22}\text{H}_{30}\text{N}_2\text{O}_{10}\text{Si}$  ( $\text{M}+\text{Na}$ )<sup>+</sup>:549.1301, found 549.1300.

## 2.4. Synthesis of 3a-3j

### Preparation of (±)-3a

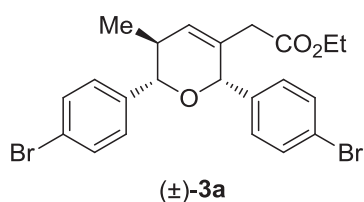

(±)-**3a** was obtained in 36% yield as the by-product in the reaction to form racemic **2a** (Table 1, entry 2).  $^1\text{H NMR}$  (400 MHz,  $\text{CDCl}_3$ )  $\delta$  7.47 (d,  $J = 7.6$  Hz, 2H), 7.45 (d,  $J = 6.0$  Hz, 2H), 7.25 (d,  $J = 6.0$  Hz, 2H), 7.24 (d,  $J = 7.6$  Hz, 2H), 5.72 (s, 1H), 5.35 (s, 1H), 4.19 (d,  $J = 9.6$  Hz, 1H), 4.07 (dq,  $J_1 = 2.4$  Hz,  $J_2 = 6.8$  Hz, 2H), 2.81 (d,  $J = 16.0$  Hz, 1H), 2.63 (d,  $J = 16.0$  Hz, 3H), 2.57 (s, 1H), 1.23 (t,  $J = 6.8$  Hz, 3H), 0.87 (t,  $J = 6.8$  Hz, 3H);  $^{13}\text{C NMR}$  (100 MHz,  $\text{CDCl}_3$ )  $\delta$  171.0, 139.5, 138.8, 132.0, 131.6, 131.4, 130.0, 129.0, 122.2, 121.8, 82.6, 79.9, 60.7, 38.9, 36.7, 16.8, 14.1; IR



(liquid film)  $\text{cm}^{-1}$  2917m, 2849, 1731, 1487, 1369m, 1260m, 1175m, 1103m, 1070s, 1010s, 850m, 809s; HRMS (ESI-TOF,  $m/z$ ) calcd for  $\text{C}_{22}\text{H}_{22}\text{Br}_2\text{O}_3$  ( $\text{M}+\text{Na}$ ) $^+$ : 514.9828, found 514.9822.

### Preparation of 3b

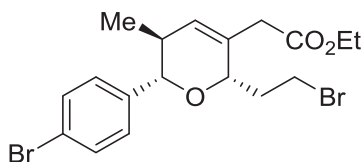

**3b**

**3b:** To a solution of **2a** (19.9 mg, 0.05 mmol) in  $\text{CH}_2\text{Cl}_2$  (1mL) was added  $\text{Ph}_3\text{C}^+\text{B}(\text{C}_6\text{F}_5)_4^-$  (0.922 mg, 0.001 mmol). The mixture was stirred at room temperature for 20 h before quenching with sat aq  $\text{NaHCO}_3$  (1 mL) and extraction with  $\text{CH}_2\text{Cl}_2$  ( $3 \times 2$  mL). The combined organic layers were dried over anhydrous  $\text{Na}_2\text{SO}_4$ , filtered and concentrated under reduced pressure. Purification of the crude residue via silica gel flash column chromatography (gradient eluent: 0-10% of EtOAc/petroleum ether) afforded **3b** (20.4 mg, 92%) as a colorless liquid. The enantiomeric ratio was determined to be 97:3 by HPLC analysis on Chiralpak OD column (0.67% 2-propanol/*n*-hexane, 1.0 mL/min), UV 220 nm,  $t_{\text{minor}} = 16.27$  min,  $t_{\text{major}} = 11.69$  min;  $[\alpha]_{\text{D}}^{20} = -3.2$  ( $c = 1.0$  in  $\text{CHCl}_3$ );  $^1\text{H}$  NMR (400 MHz,  $\text{CDCl}_3$ )  $\delta$  7.47 (d,  $J = 7.6$  Hz, 2H), 7.19 (d,  $J = 7.6$  Hz, 2H), 5.26 (s, 1H), 4.44 (s, 1H), 4.17 (q,  $J = 6.8$  Hz, 2H), 3.96 (d,  $J = 9.2$  Hz, 3H); 3.46 (t,  $J = 6.8$  Hz, 2H), 3.08 (d,  $J = 15.6$  Hz, 1H), 3.00 (d,  $J = 15.6$  Hz, 1H), 3.32 (m, 1H), 2.02 (m, 2H), 1.91 (d,  $J = 8.8$  Hz, 2H), 1.29 (t,  $J = 6.8$  Hz, 3H), 0.79 (d,  $J = 6.8$  Hz, 3H);  $^{13}\text{C}$  NMR (150 MHz,  $\text{CDCl}_3$ )  $\delta$  171.0, 140.1, 131.9, 131.8, 131.3, 128.9, 121.6, 82.0, 75.6, 60.9, 38.7, 36.8, 34.3, 31.0, 27.7, 16.7, 14.2; IR (liquid film)  $\text{cm}^{-1}$  2960w, 2918m, 2850w, 1733m, 1260m, 1175w, 1094m, 1011s, 754s; HRMS (ESI-TOF,  $m/z$ ) calcd for  $\text{C}_{19}\text{H}_{24}\text{Br}_2\text{O}_3$  ( $\text{M}+\text{Na}$ ) $^+$ : 480.9984, found 480.9983.

### Preparation of 3c

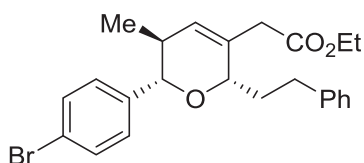

**3c**

**3c:** Using the same procedure as that used for **3b** afforded **3c** (15.5 mg, 70%) as a colorless liquid. The enantiomeric ratio was determined to be 97:3 by HPLC analysis on Chiralpak IC column (0.25% 2-propanol/*n*-hexane, 1.0 mL/min), UV 220 nm,  $t_{\text{minor}} = 30.17$  min,  $t_{\text{major}} = 35.48$  min;  $[\alpha]_{\text{D}}^{20} = -8.0$  ( $c = 1.0$  in  $\text{CHCl}_3$ );  $^1\text{H NMR}$  (400 MHz,  $\text{CDCl}_3$ )  $\delta$  7.49 (d,  $J = 7.6$  Hz, 2H), 7.19-7.29 (m, 2H), 5.64 (s, 1H), 4.42 (s, 1H), 4.15 (q,  $J = 6.8$  Hz, 2H), 3.99 (d,  $J = 9.6$  Hz, 1H), 3.09 (d,  $J = 15.6$  Hz, 1H), 3.02 (d,  $J = 15.6$  Hz, 1H), 2.69-2.82 (m, 2H), 2.36 (m, 1H), 2.10-2.12 (m, 1H), 1.87-1.92 (m, 1H), 1.25 (t,  $J = 6.8$  Hz, 3H), 0.81 (d,  $J = 7.2$  Hz, 3H);  $^{13}\text{C NMR}$  (150 MHz,  $\text{CDCl}_3$ )  $\delta$  171.1, 142.4, 140.4, 132.1, 131.7, 128.9, 128.5, 128.3, 125.7, 121.5, 82.0, 75.7, 60.8, 38.8, 36.9, 34.3, 16.7, 14.2; IR (liquid film)  $\text{cm}^{-1}$  2959m, 2927m, 1732s, 1490m, 1454m, 1369m, 1264m, 1172m, 1098m, 1030s, 1011s, 812m; HRMS (ESI-TOF,  $m/z$ ) calcd for  $\text{C}_{24}\text{H}_{27}\text{BrO}_3$  ( $\text{M}+\text{Na}$ ) $^+$ : 465.1036, found 465.1039.

### Preparation of 3d

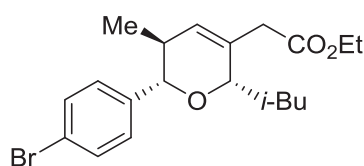

**3d**

**3d:** Using the same procedure as that used for **3b** afforded **3d** (19.4 mg, 98%) as a colorless liquid. The enantiomeric ratio was determined to be 98:2 by HPLC analysis on Chiralpak IC column (0.25% 2-propanol/*n*-hexane, 1.0 mL/min), UV 220 nm,  $t_{\text{minor}} = 8.79$  min,  $t_{\text{major}} = 9.41$  min;  $[\alpha]_{\text{D}}^{20} = -18.5$  ( $c = 1.0$  in  $\text{CHCl}_3$ );  $^1\text{H NMR}$  (400 MHz,  $\text{CDCl}_3$ )  $\delta$  7.46 (d,  $J = 8.0$  Hz, 2H), 7.21 (d,  $J = 8.0$  Hz, 2H), 5.55 (s, 1H), 4.37 (t,  $J = 4.0$  Hz, 1H), 4.17 (q,  $J = 7.2$  Hz, 2H), 3.95 (d,  $J = 9.2$  Hz, 1H); 3.09 (d,  $J = 16.0$  Hz, 1H), 2.99 (d,  $J = 16.0$  Hz, 1H), 2.31 (m, 1H), 1.85-1.95 (dt,  $J_1 = 6.8$  Hz, d,  $J_2 = 6.8$  Hz, 1H), 1.42-1.54 (m, 2H), 1.28 (t,  $J = 7.2$  Hz, 3H), 0.90 (t,  $J = 6.8$  Hz, 6H), 0.80 (d,  $J = 7.2$  Hz, 3H);  $^{13}\text{C NMR}$  (100 MHz,  $\text{CDCl}_3$ )  $\delta$  171.2, 140.5, 133.2, 131.1, 130.8, 128.9, 121.3, 82.0, 60.7, 41.8, 38.9, 36.9, 24.1, 24.0, 21.7, 16.8, 14.2; IR (liquid film)  $\text{cm}^{-1}$  2956m, 2927m, 1735s, 1156m, 1094s, 1009s, 912w, 810s; HRMS (ESI-TOF,  $m/z$ ) calcd for  $\text{C}_{20}\text{H}_{27}\text{BrO}_3$  ( $\text{M}+\text{Na}$ ) $^+$ : 417.1036, found 417.1038.

### Preparation of 3e

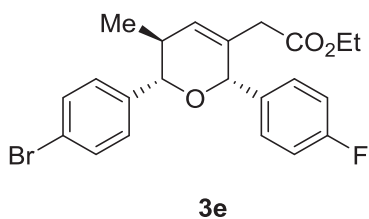

**3e:** Using the same procedure as that used for **3b** afforded **3e** (19.5 mg, 90%) as a colorless liquid. The enantiomeric ratio was determined to be 98:2 by HPLC analysis on Chiralpak OD column (0.67% 2-propanol/*n*-hexane, 1.0 mL/min), UV 220 nm,  $t_{\text{minor}} = 15.81$  min,  $t_{\text{major}} = 10.32$  min;  $[\alpha]_{\text{D}}^{20} = +21.6$  ( $c = 1.0$  in  $\text{CHCl}_3$ );  $^1\text{H NMR}$  (400 MHz,  $\text{CDCl}_3$ )  $\delta$  7.45 (d,  $J = 8.4$  Hz, 1H), 7.35 (d,  $J = 8.0$  Hz, 2H), 7.34 (d,  $J = 5.6$  Hz, 1H), 7.26-7.30 (m, 2H), 7.25 (d,  $J = 8.4$  Hz, 1H), 7.03 (d,  $J = 8.4$  Hz, 1H), 7.01 (d,  $J = 8.4$  Hz, 1H), 5.72 (s, 1H), 5.36 (s, 1H), 4.07 (dq,  $J_1 = 4.8$  Hz,  $J_2 = 7.2$  Hz, 2H), 2.80 (d,  $J = 16.0$  Hz, 1H), 2.64 (d,  $J = 16.0$  Hz, 1H), 2.57 (m, 1H), 1.23 (t,  $J = 7.2$  Hz, 3H), 0.87 (d,  $J = 7.2$  Hz, 3H);  $^{13}\text{C NMR}$  (100 MHz,  $\text{CDCl}_3$ )  $\delta$  171.0, 163.7 (CH, d,  $J_{\text{C-F}} = 245.5$  Hz), 139.6, 135.6, 132.3, 131.4, 131.2, 130.0 (CH, d,  $J_{\text{C-F}} = 8.1$  Hz), 129.0, 127.9, 127.2, 121.7, 115.4 (CH, d,  $J_{\text{C-F}} = 21.6$  Hz), 82.7, 79.9, 60.7, 38.9, 36.7, 16.8, 14.1; IR (liquid film)  $\text{cm}^{-1}$  2926w, 1729w, 1510w, 1261w, 1215m, 1012w, 746s; HRMS (ESI-TOF,  $m/z$ ) calcd for  $\text{C}_{22}\text{H}_{22}\text{BrFO}_3$  ( $\text{M}+\text{Na}$ ) $^+$ :455.0629, found 455.0636.

### Preparation of 3f

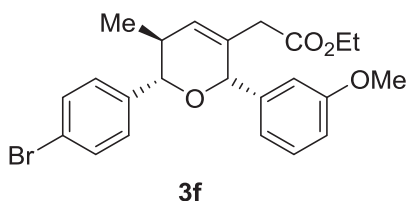

**3f:** Using the same procedure as that used for **3b** afforded **3f** (21.6 mg, 95%) as a colorless liquid. The enantiomeric ratio was determined to be 97:3 by HPLC analysis on Chiralpak OD column (0.25% 2-propanol/*n*-hexane, 1.0 mL/min), UV 220 nm,  $t_{\text{minor}} = 72.38$  min,  $t_{\text{major}} = 78.18$  min;  $[\alpha]_{\text{D}}^{20} = +57.6$  ( $c = 1.0$  in  $\text{CHCl}_3$ );  $^1\text{H NMR}$  (400 MHz,  $\text{CDCl}_3$ )  $\delta$  7.45 (d,  $J = 8.0$ , 2H), 7.26 (d,  $J = 7.6$  Hz, 1H), 7.24 (d,  $J = 7.2$  Hz, 1H), 6.96 (d,  $J = 7.6$  Hz, 1H), 6.94 (d,  $J = 7.2$  Hz, 1H), 6.84 (d,  $J = 8.0$  Hz, 1H), 5.71 (s, 1H), 5.35 (s, 1H), 4.20 (d,  $J = 9.2$  Hz, 1H), 4.09 (dq,  $J_1 = 4.8$  Hz,  $J_2 = 6.8$  Hz, 2H), 3.81 (s, 3H), 2.82 (d,  $J = 16.0$  Hz, 1H), 2.68 (d,  $J = 16.0$  Hz, 1H), 2.58 (m, 1H), 1.24 (t,  $J = 6.8$  Hz,

3H), 0.87 (d,  $J = 7.2$  Hz, 3H);  $^{13}\text{C}$  NMR (150 MHz,  $\text{CDCl}_3$ )  $\delta$  171.2, 159.7, 141.3, 139.7, 132.4, 131.3, 130.8, 129.5, 129.0, 121.6, 120.7, 113.9, 113.6, 82.6, 80.5, 60.6, 55.2, 38.9, 36.7, 14.2, 14.1; IR (liquid film)  $\text{cm}^{-1}$  2963w, 1730m, 1488m, 1264s, 1070m, 1012m, 816m, 792m, 732m, 703s; HRMS (ESI-TOF,  $m/z$ ) calcd for  $\text{C}_{23}\text{H}_{25}\text{BrO}_4$  ( $\text{M}+\text{Na}$ ) $^+$ : 467.0828, found 467.0824.

### Preparation of 3g

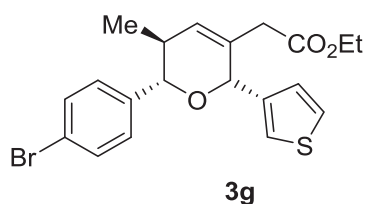

**3g**: Using the same procedure as that used for **3b** afforded **3g** (20.7 mg, 98%) as a colorless liquid. The enantiomeric ratio was determined to be 97:3 by HPLC analysis on Chiralpak IC column (1.0% 2-propanol/*n*-hexane, 1.0 mL/min), UV 220 nm,  $t_{\text{minor}} = 12.29$  min,  $t_{\text{major}} = 16.51$  min;  $[\alpha]_{\text{D}}^{20} = +11.0$  ( $c = 1.0$  in  $\text{CHCl}_3$ );  $^1\text{H}$  NMR (400 MHz,  $\text{CDCl}_3$ )  $\delta$  7.45 (d,  $J = 8.0$  Hz, 2H), 7.24-7.30 (m, 4H), 7.09 (d,  $J = 4.8$  Hz, 1H), 5.68 (s, 1H), 5.52 (s, 1H), 4.18 (d,  $J = 9.6$  Hz, 1H), 4.09 (q,  $J = 6.8$  Hz, 2H), 2.84 (d,  $J = 16.0$  Hz, 1H), 2.63 (d,  $J = 16.0$  Hz, 1H), 1.24 (t,  $J = 6.8$  Hz, 3H), 0.86 (t,  $J = 6.8$  Hz, 3H);  $^{13}\text{C}$  NMR (150 MHz,  $\text{CDCl}_3$ )  $\delta$  171.1, 140.6, 139.7, 132.1, 131.1, 130.7, 129.0, 126.6, 126.1, 124.1, 121.7, 82.8, 38.9, 36.7, 16.8, 14.2; IR (liquid film)  $\text{cm}^{-1}$  2918w, 1731m, 1489w, 1264m, 1177w, 1071m, 1012m, 788m; HRMS (ESI-TOF,  $m/z$ ) calcd for  $\text{C}_{20}\text{H}_{21}\text{BrO}_3\text{S}$  ( $\text{M}+\text{Na}$ ) $^+$ : 443.0287, found 443.0290.

### Preparation of 3h

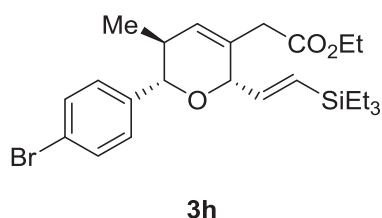

**3h**: Using the same procedure as that used for **3b** afforded **3h** (21.6 mg, 90%) as a colorless liquid. The enantiomeric ratio was determined to be 98:2 by HPLC analysis on Chiralpak IC column (1.0% 2-propanol/*n*-hexane, 1.0 mL/min), UV 220 nm,  $t_{\text{minor}} = 4.50$  min,  $t_{\text{major}} = 5.78$  min;  $[\alpha]_{\text{D}}^{20} = +3.7$  ( $c = 1.0$  in  $\text{CHCl}_3$ );  $^1\text{H}$  NMR (400 MHz,  $\text{CDCl}_3$ )  $\delta$  7.47 (d,  $J = 8.0$  Hz, 2H), 7.24 (d,  $J = 8.0$  Hz, 2H),

5.29-5.93 (m, 2H), 5.61 (s, 1H), 4.79 (s, 1H), 4.15 (q,  $J = 7.2$  Hz, 2H), 4.03 (d,  $J = 9.2$  Hz, 1H), 3.05 (d,  $J = 16.0$  Hz, 1H), 2.95 (d,  $J = 16.0$  Hz, 1H), 2.40 (m, 1H), 1.27 (t,  $J = 7.2$  Hz, 3H), 0.93 (t,  $J = 8.0$  Hz, 9H), 0.80 (t,  $J = 7.2$  Hz, 3H), 0.58 (q,  $J = 8.0$  Hz, 6H);  $^{13}\text{C}$  NMR (150 MHz,  $\text{CDCl}_3$ )  $\delta$  171.2, 144.7, 139.9, 131.9, 131.4, 131.1, 130.9, 129.1, 121.6, 82.1, 82.0, 60.7, 38.7, 36.6, 16.8, 14.2, 7.3, 3.3; IR (liquid film)  $\text{cm}^{-1}$  2955m, 2918m, 1737s, 1260m, 1180m, 1070s, 1012s, 991m;; HRMS (ESI-TOF,  $m/z$ ) calcd for  $\text{C}_{24}\text{H}_{35}\text{BrO}_3\text{Si}$  ( $\text{M}+\text{Na}$ ) $^+$ : 501.1431, found 501.1425.

### Preparation of 3i

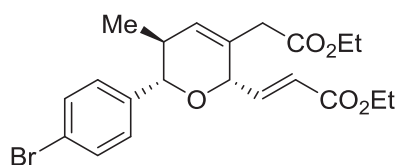

**3i**

**3i:** Using the same procedure as that used for **3b** afforded **3i** (15.5 mg, 80%) as a colorless liquid. The enantiomeric ratio was determined to be 98:2 by HPLC analysis on Chiralpak IC column (1.0% 2-propanol/*n*-hexane, 1.0 mL/min), UV 220 nm,  $t_{\text{minor}} = 55.01$  min,  $t_{\text{major}} = 59.21$  min;  $[\alpha]_{\text{D}}^{20} = -3.2^\circ$  ( $c = 1.0$  in  $\text{CHCl}_3$ );  $^1\text{H}$  NMR (400 MHz,  $\text{CDCl}_3$ )  $\delta$  7.48 (d,  $J = 8.4$  Hz, 2H), 7.24 (d,  $J = 8.4$  Hz, 2H), 6.90 (dd,  $J_1 = 6.8$  Hz,  $J_2 = 6.8$  Hz, 1H), 6.14 (d,  $J = 15.6$  Hz, 1H), 5.67 (s, 1H), 5.02 (s, 1H), 4.20 (q,  $J = 7.2$  Hz, 2H), 4.15 (q,  $J = 7.2$  Hz, 2H), 4.06 (d,  $J = 9.2$  Hz, 1H), 3.09 (d,  $J = 16.0$  Hz, 1H), 3.01 (d,  $J = 16.0$  Hz, 1H), 2.42 (s, 1H), 1.29 (t,  $J = 7.2$  Hz, 3H), 1.27 (t,  $J = 7.2$  Hz, 3H), 0.82 (d,  $J = 7.2$  Hz, 3H);  $^{13}\text{C}$  NMR (150 MHz,  $\text{CDCl}_3$ )  $\delta$  170.8, 166.0, 144.4, 139.4, 132.0, 131.5, 129.8, 129.0, 123.8, 121.9, 82.1, 60.9, 60.5, 38.7, 36.4, 16.6, 14.2, 14.1; IR (liquid film)  $\text{cm}^{-1}$  2962w, 2921m, 2851w, 1722s, 1369m, 1261s, 1175s, 1071s, 1031s, 1011s, 981m, 805s; HRMS (ESI-TOF,  $m/z$ ) calcd for  $\text{C}_{21}\text{H}_{25}\text{BrO}_5$  ( $\text{M}+\text{Na}$ ) $^+$ : 459.0778, found 459.0778.

### Preparation of 3j

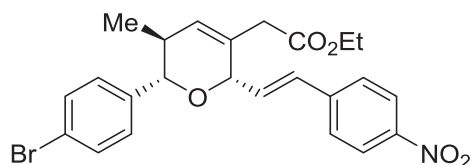

**3j**

**3j**: Using the same procedure as that used for **3b** afforded **3j** (21.9 mg, 90%) as a colorless liquid. The enantiomeric ratio was determined to be 98:2 by HPLC analysis on Chiralpak OD column (5.0% 2-propanol/*n*-hexane, 1.0 mL/min), UV 220 nm,  $t_{\text{minor}} = 18.16$  min,  $t_{\text{major}} = 14.81$  min;  $[\alpha]_{\text{D}}^{20} = +12.0$  ( $c = 1.0$  in  $\text{CHCl}_3$ );  $^1\text{H NMR}$  (400 MHz,  $\text{CDCl}_3$ )  $\delta$  8.15 (d,  $J = 8.0$  Hz, 2H), 7.49 (d,  $J = 8.0$  Hz, 2H), 7.47 (d,  $J = 8.0$  Hz, 2H), 7.25 (d,  $J = 8.0$  Hz, 2H), 6.74 (d,  $J = 16.0$  Hz, 1H), 6.33 (dd,  $J_1 = 16.0$  Hz,  $J_2 = 8.0$  Hz, 1H), 5.71 (s, 1H), 5.00 (d,  $J = 6.0$  Hz, 1H), 4.10 (q,  $J = 6.8$  Hz, 2H), 4.07 (d,  $J = 6.8$  Hz, 1H), 3.08 (d,  $J = 16.0$  Hz, 1H), 3.00 (d,  $J = 16.0$  Hz, 1H), 2.50 (m, 1H), 1.19 (t,  $J = 6.8$  Hz, 3H), 0.83 (d,  $J = 6.8$  Hz, 3H);  $^{13}\text{C NMR}$  (150 MHz,  $\text{CDCl}_3$ )  $\delta$  171.1, 147.1, 142.8, 139.4, 132.5, 131.8, 131.5, 130.6, 129.0, 127.1, 123.9, 121.9, 82.3, 78.8, 60.8, 38.7, 36.3, 16.7, 14.1; IR (liquid film)  $\text{cm}^{-1}$  2917w, 1730m, 1596m, 1516s, 1341s, 1179m, 1070s, 1011s, 972m, 863m; HRMS (ESI-TOF,  $m/z$ ) calcd for  $\text{C}_{24}\text{H}_{24}\text{BrNO}_5$  ( $\text{M}+\text{Na}$ ) $^+$ : 508.0730, found 508.0731.

## 2.5. One-pot Synthesis of 3k-3m.

### Preparation of 3k

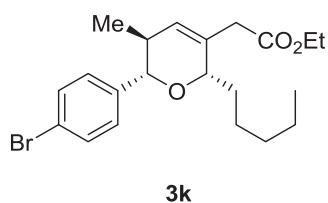

**3k**: To a solution of (*S*)-**1a** (20.5 mg, 0.05 mmol) and *p*-Br- $\text{C}_6\text{H}_4\text{CHO}$  (9.25 mg, 0.05 mmol) in anhydrous  $\text{CHCl}_3$  (0.5 mL) was added  $\text{Ph}_3\text{C}^+\text{B}(\text{C}_6\text{F}_5)_4^-$  (0.92 mg, 0.001 mmol) at room temperature. After stirring for 2 h, a solution of *n*-hexanal (14.6 mg, 0.146 mmol) in anhydrous  $\text{CH}_2\text{Cl}_2$  (0.5 mL) was added to the above mixture. The reaction was stirred for 20 h before quenching with sat aq  $\text{NaHCO}_3$  (2 mL) and extraction with  $\text{CH}_2\text{Cl}_2$  ( $3 \times 2$  mL). The combined organic phases were dried over anhydrous  $\text{Na}_2\text{SO}_4$ , filtered and concentrated under reduced pressure. Purification of the crude residue via silica gel flash column chromatography (gradient eluent: 0-20% of EtOAc/petroleum ether) afforded **3k** (11.2 mg, 55%) as a yellow oil. The enantiomeric ratio was determined to be 97.5:2.5 by HPLC analysis on Chiralpak IC column (0.5% 2-propanol/*n*-hexane, 1.0 mL/min), UV 220nm,  $t_{\text{minor}} = 8.13$  min,  $t_{\text{major}} = 9.09$  min;  $[\alpha]_{\text{D}}^{20} = -3.5$  ( $c = 1.0$  in  $\text{CHCl}_3$ );  $^1\text{H NMR}$  (400 MHz,  $\text{CDCl}_3$ )  $\delta$  7.46 (d,  $J = 8.4$  Hz, 2H), 7.22 (d,  $J = 8.4$  Hz, 2H), 5.58 (s, 1H), 4.37 (s, 1H), 4.17 (q,  $J = 7.2$  Hz, 2H), 3.95 (d,  $J = 9.6$  Hz, 1H), 3.05 (d,  $J = 15.6$  Hz, 1H), 2.98 (d,  $J = 15.6$  Hz, 1H), 2.31 (m,

1H), 1.70-1.74 (m, 1H), 1.51-1.58 (m, 2H), 1.43-1.50 (m, 1H), 1.28-1.39 (m, 4H), 1.28 (t,  $J = 7.2$  Hz, 3H), 0.88 (t,  $J = 6.8$  Hz, 3H), 0.78 (d,  $J = 6.8$  Hz, 3H);  $^{13}\text{C}$  NMR (100 MHz,  $\text{CDCl}_3$ )  $\delta$  171.3, 140.5, 132.5, 131.3, 128.9, 121.5, 81.9, 82.0, 82.0, 76.3, 60.7, 38.9, 36.9, 32.6, 32.0, 23.8, 22.6, 16.8, 14.2, 14.1; IR (liquid film)  $\text{cm}^{-1}$  2926s, 2851m, 1736s, 1490m, 1457m, 1369m, 1174m, 1071m, 1011s, 811m; HRMS (ESI-TOF,  $m/z$ ) calcd for  $\text{C}_{21}\text{H}_{29}\text{BrO}_3$  ( $\text{M}+\text{Na}$ ) $^+$ : 431.1192, found 431.1193.

### Preparation of 3l

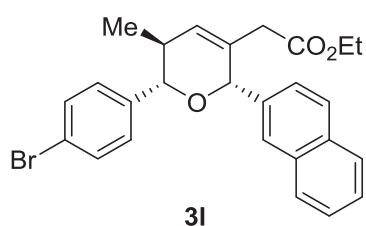

**3l**: Using the same procedure as that used for **3k** afforded **3l** (11.6 mg, 50%) as a colorless liquid. The enantiomeric ratio was determined to be 97:3 by HPLC analysis on Chiralpak IC column (1.0% 2-propanol/*n*-hexane, 1.0 mL/min), UV 220nm,  $t_{\text{minor}} = 43.10\text{min}$ ,  $t_{\text{major}} = 62.82\text{ min}$ ;  $[\alpha]_{\text{D}}^{20} = +42.5$  ( $c = 1.0$  in  $\text{CHCl}_3$ );  $^1\text{H}$  NMR (400 MHz,  $\text{CDCl}_3$ )  $\delta$  7.80-7.86 (m, 4H), 7.52 (d,  $J = 8.0$ , 1H), 7.48 (d,  $J = 3.2$  Hz, 1H), 7.45 (d,  $J = 8.0$  Hz, 2H), 5.78 (s, 1H), 5.56 (s, 1H), 4.27 (d,  $J = 6.8$  Hz, 1H), 4.02 (dq,  $J_1 = 3.2$  Hz,  $J_2 = 7.2$  Hz, 2H), 2.83 (d,  $J = 16.0$  Hz, 1H), 2.66 (d,  $J = 16.0$  Hz, 1H), 2.64 (m, 1H), 1.16 (t,  $J = 7.2$  Hz, 3H), 0.91 (d,  $J = 6.8$  Hz, 3H);  $^{13}\text{C}$  NMR (150 MHz,  $\text{CDCl}_3$ )  $\delta$  171.1, 139.8, 132.4, 131.4, 131.2, 129.0, 128.5, 128.0, 127.9, 127.6, 126.1, 125.4, 121.7, 82.6, 80.8, 60.6, 38.9, 36.9; IR (liquid film)  $\text{cm}^{-1}$  3054w, 1729m, 1264s, 1176w, 1072m, 1012m, 816m; HRMS (ESI-TOF,  $m/z$ ) calcd for  $\text{C}_{26}\text{H}_{25}\text{BrO}_3$  ( $\text{M}+\text{Na}$ ) $^+$ : 487.0879, found 487.0878.

### Preparation of 3m

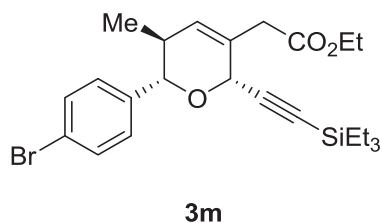

**3m**: Using the same procedure as that used for **3k** afforded **3m** (15.5 mg, 65%) as a colorless liquid. The enantiomeric ratio was determined to be 97:3 by HPLC analysis on Chiralpak IC column (1.0% 2-propanol/*n*-hexane, 1.0 mL/min), UV 220 nm,  $t_{\text{minor}} = 4.61$  min,  $t_{\text{major}} = 5.61$  min;  $[\alpha]_{\text{D}}^{20} = +9.6$  ( $c = 1.0$  in  $\text{CHCl}_3$ );  $^1\text{H NMR}$  (400 MHz,  $\text{CDCl}_3$ )  $\delta$  7.47 (d,  $J = 8.0$  Hz, 2H), 7.25 (d,  $J = 8.0$  Hz, 2H), 5.62 (s, 1H), 5.29 (s, 1H), 4.16 (q,  $J = 7.2$  Hz, 2H), 4.03 (d,  $J = 9.2$  Hz, 1H), 3.46 (d,  $J = 16.4$  Hz, 1H), 3.13 (d,  $J = 16.4$  Hz, 1H), 2.48 (m, 1H), 1.28 (t,  $J = 7.2$  Hz, 3H), 0.97 (t,  $J = 8.0$  Hz, 9H), 0.60 (q,  $J = 8.0$  Hz, 6H);  $^{13}\text{C NMR}$  (100 MHz,  $\text{CDCl}_3$ )  $\delta$  171.0, 139.1, 131.4, 131.0, 129.3, 129.2, 121.9, 102.5, 88.9, 82.8, 69.1, 60.8, 39.0, 36.2, 16.6, 14.2, 7.4, 4.2; IR (liquid film)  $\text{cm}^{-1}$  2958w, 1731w, 1265m, 1088w, 1075w, 1012w; HRMS (ESI-TOF,  $m/z$ ) calcd for  $\text{C}_{24}\text{H}_{33}\text{BrO}_3\text{Si}$  ( $\text{M}+\text{Na}$ ) $^+$ :499.1275, found 499.1275.

## 2.6. Functionalization of **3d**

### Preparation of **8**

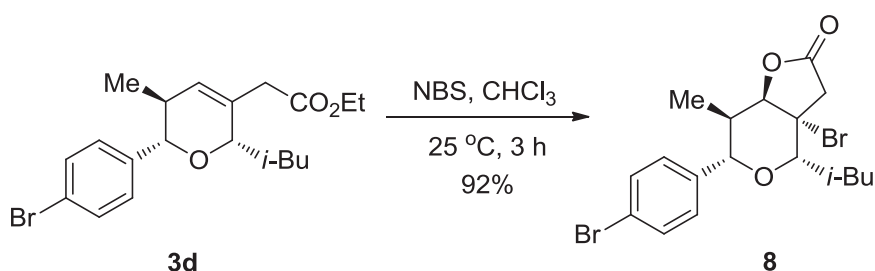

**8**: To a solution of **3d** (50.0 mg, 0.127 mmol) in anhydrous  $\text{CHCl}_3$  (1 mL) was added NBS (25 mg, 0.140 mmol) at 25 °C. After stirring for 3 h, the reaction was quenched with sat aq  $\text{NH}_4\text{Cl}$  (1 mL) and extracted with  $\text{CH}_2\text{Cl}_2$  ( $3 \times 1$  mL). The combined organic layers were dried over anhydrous  $\text{Na}_2\text{SO}_4$ , filtered and concentrated under reduced pressure. Purification of the crude residue via silica gel flash column chromatography (gradient eluent: 0-1.0% of EtOAc/petroleum ether) afforded **8** (51.9 mg, 92% yield) as a colorless oil. The enantiomeric ratio was determined to be 97:3 by HPLC analysis on Chiralpak IC column (5% 2-propanol/*n*-hexane, 1.0 mL/min), UV 220nm,  $t_{\text{minor}} = 10.80$ ,  $t_{\text{major}} = 6.99$  min;  $[\alpha]_{\text{D}}^{20} = +1.6$  ( $c = 1.0$  in  $\text{CHCl}_3$ );  $^1\text{H NMR}$  (400 MHz,  $\text{CDCl}_3$ )  $\delta$  7.49 (d,  $J = 8.0$  Hz, 1H), 7.22 (d,  $J = 8.0$  Hz, 1H), 4.76 (d,  $J = 2.8$  Hz, 1H), 4.21 (d,  $J = 10.4$  Hz, 1H), 3.31 (d,  $J = 8.8$  Hz, 1H), 3.11 (d,  $J = 17.2$  Hz, 1H), 2.88 (d,  $J = 17.2$  Hz, 1H), 2.36-2.41 (m, 1H), 1.70-1.77 (m, 1H), 1.16-1.25 (m, 1H), 0.87 (q,  $J = 7.2$  Hz, 9H);  $^{13}\text{C NMR}$  (150 MHz,  $\text{CDCl}_3$ )  $\delta$  172.4, 138.3, 131.5, 128.9, 122.2, 87.7, 80.3, 76.7, 59.9, 43.6, 41.7, 34.1, 24.7, 23.4,



22.0, 13.0; IR (liquid film)  $\text{cm}^{-1}$  2957w, 2917s, 2849s, 1795s, 1462m, 1376w, 1260w, 1073m, 1012m, 808m; HRMS (ESI-TOF,  $m/z$ ) calcd for  $\text{C}_{19}\text{H}_{25}\text{BrO}_3$  ( $\text{M}+\text{Na}$ ) $^+$ :468.9807, found 468.9803.

### Preparation of 9

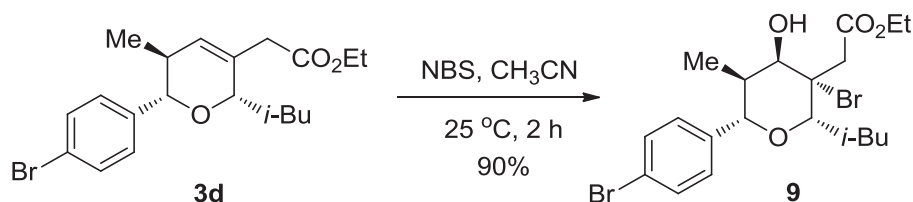

**9**: To a solution of **3d** (50.0 mg, 0.127 mmol) in anhydrous  $\text{CH}_3\text{CN}$  (1 mL) was added NBS (25 mg, 0.140 mmol) at  $25\text{ }^\circ\text{C}$ . After stirring for 2 h, the reaction was quenched with sat aq  $\text{NH}_4\text{Cl}$  (1 mL) and extracted with  $\text{CH}_2\text{Cl}_2$  ( $3 \times 1$  mL). The combined organic layers were dried over anhydrous  $\text{Na}_2\text{SO}_4$ , filtered and concentrated under reduced pressure. Purification of the crude residue via silica gel flash column chromatography (gradient eluent: 0-1.0% of EtOAc/petroleum ether) afforded **9** (56.0 mg, 90% yield) as a colorless oil. The enantiomeric ratio was determined to be 97:3 by HPLC analysis on Chiralpak OD column (5% 2-propanol/*n*-hexane, 1.0 mL/min), UV 220nm,  $t_{\text{minor}} = 13.68$ ,  $t_{\text{major}} = 12.58$  min;  $[\alpha]_{\text{D}}^{20} = -28.5$  ( $c = 1.0$  in  $\text{CHCl}_3$ );  $^1\text{H}$  NMR (400 MHz,  $\text{CDCl}_3$ )  $\delta$  7.46 (d,  $J = 8.4$  Hz, 2H), 7.24 (d,  $J = 8.4$  Hz, 2H), 4.25 (dq,  $J_1 = 3.6$  Hz,  $J_2 = 7.2$  Hz, 2H), 4.15 (m, 1H), 3.63 (d,  $J = 8.0$  Hz, 1H), 3.62 (s, 1H), 3.03 (d,  $J = 14.4$  Hz, 1H), 2.94 (d,  $J = 14.4$  Hz, 1H), 2.54-2.59 (m, 1H), 1.67-1.79 (m, 2H), 1.33 (t,  $J = 7.2$  Hz, 3H), 0.87 (d,  $J = 6.4$  Hz, 3H), 0.84 (d,  $J = 6.4$  Hz, 3H), 0.72 (d,  $J = 6.8$  Hz, 3H);  $^{13}\text{C}$  NMR (100 MHz,  $\text{CDCl}_3$ )  $\delta$  171.0, 140.0, 131.3, 129.1, 121.5, 80.0, 75.9, 74.8, 70.5, 61.6, 42.5, 40.4, 36.7, 24.2, 23.6, 21.8, 14.2, 13.7; IR (liquid film)  $\text{cm}^{-1}$  2925w, 2854w, 1710w, 1261m, 1214s, 1093m, 1012m; HRMS (ESI-TOF,  $m/z$ ) calcd for  $\text{C}_{21}\text{H}_{31}\text{BrO}_4$  ( $\text{M}+\text{Na}$ ) $^+$ :515.0226, found 515.0228.

### **2.7. Determining the absolute configuration of (S)-1a**

#### **DFT Calculation Procedures:**

CD spectroscopy is obtained by density functional theory (DFT) calculations. All the DFT calculations of structure of starting material (ground state) and corresponding vibrational frequencies were performed on Gaussian 03 software with B3LYP/6-31G(d) basic set.

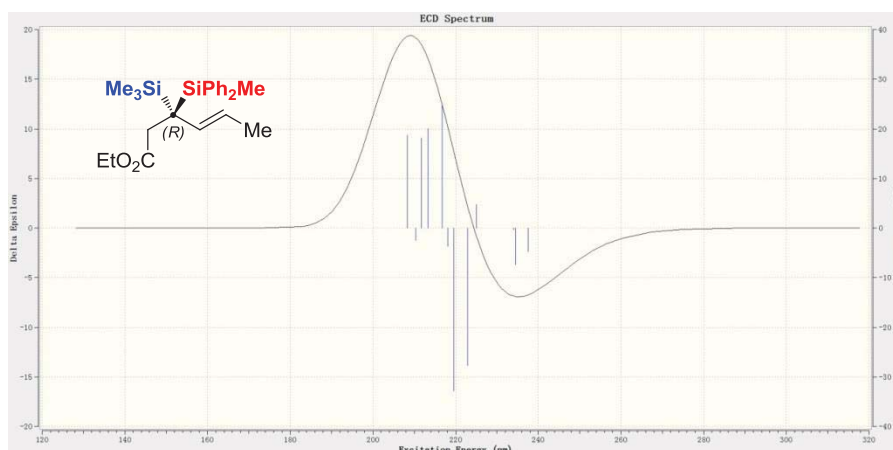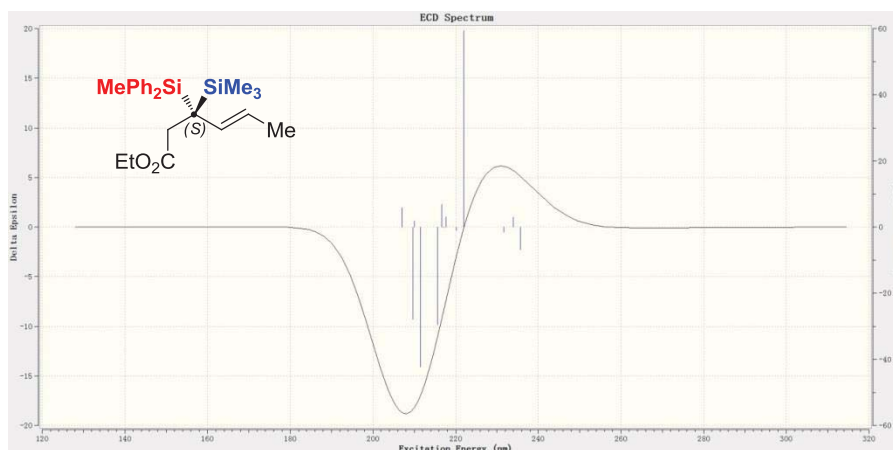

Electronic circular dichroism (ECD) spectra provided by quantum chemical calculation with SMD model, at the B3LYP/6-31G (d) level (methanol as solvent) were performed.

### Computational data:

#### R.log

Zero-point correction= 0.523198 (Hartree/Particle)

Thermal correction to Energy= 0.556411

Thermal correction to Enthalpy= 0.557355

Thermal correction to Gibbs Free Energy= 0.458808

E(sof.) = -1664.64809426 A.U.

---

| Center | Atomic | Atomic | Coordinates (Angstroms) |          |          |
|--------|--------|--------|-------------------------|----------|----------|
| Number | Number | Type   | X                       | Y        | Z        |
| 1      | 6      | 0      | -0.838595               | 0.097596 | 0.160410 |

---

|    |    |   |           |           |           |
|----|----|---|-----------|-----------|-----------|
| 2  | 6  | 0 | -0.596734 | 0.003863  | 1.710542  |
| 3  | 1  | 0 | -0.060821 | 0.907965  | 2.025080  |
| 4  | 1  | 0 | 0.072523  | -0.839662 | 1.911742  |
| 5  | 6  | 0 | -1.651801 | 1.333179  | -0.143060 |
| 6  | 8  | 0 | -1.918052 | 2.229830  | 0.638914  |
| 7  | 8  | 0 | -2.085916 | 1.369980  | -1.433993 |
| 8  | 6  | 0 | -2.859536 | 2.532833  | -1.808978 |
| 9  | 1  | 0 | -2.246913 | 3.427656  | -1.657952 |
| 10 | 1  | 0 | -3.724638 | 2.611387  | -1.143359 |
| 11 | 6  | 0 | -3.269989 | 2.365164  | -3.260162 |
| 12 | 1  | 0 | -3.854331 | 3.234141  | -3.582274 |
| 13 | 1  | 0 | -2.392943 | 2.281144  | -3.909998 |
| 14 | 1  | 0 | -3.885510 | 1.469581  | -3.393878 |
| 15 | 6  | 0 | -1.817844 | -0.125218 | 2.588523  |
| 16 | 1  | 0 | -2.589502 | 0.629626  | 2.445691  |
| 17 | 6  | 0 | -1.965046 | -1.035223 | 3.557181  |
| 18 | 1  | 0 | -1.176684 | -1.775434 | 3.712241  |
| 19 | 6  | 0 | -3.140088 | -1.123063 | 4.490212  |
| 20 | 1  | 0 | -3.885478 | -0.351153 | 4.270424  |
| 21 | 1  | 0 | -3.633984 | -2.102106 | 4.422583  |
| 22 | 1  | 0 | -2.827780 | -1.002304 | 5.536747  |
| 23 | 14 | 0 | -1.816530 | -1.478782 | -0.487259 |
| 24 | 6  | 0 | -1.206396 | -3.037085 | 0.398001  |
| 25 | 1  | 0 | -1.373703 | -2.981706 | 1.477996  |
| 26 | 1  | 0 | -1.772340 | -3.898843 | 0.020599  |
| 27 | 1  | 0 | -0.144952 | -3.235644 | 0.222769  |
| 28 | 6  | 0 | -3.665659 | -1.275382 | -0.111473 |
| 29 | 1  | 0 | -4.094118 | -0.398112 | -0.607902 |
| 30 | 1  | 0 | -4.208343 | -2.157368 | -0.475770 |
| 31 | 1  | 0 | -3.854387 | -1.188409 | 0.962639  |

|    |    |   |           |           |           |
|----|----|---|-----------|-----------|-----------|
| 32 | 6  | 0 | -1.662612 | -1.773554 | -2.354011 |
| 33 | 1  | 0 | -0.651372 | -2.060347 | -2.658337 |
| 34 | 1  | 0 | -2.329513 | -2.601752 | -2.627168 |
| 35 | 1  | 0 | -1.966203 | -0.895420 | -2.930803 |
| 36 | 14 | 0 | 0.922272  | 0.307223  | -0.682180 |
| 37 | 6  | 0 | 1.885140  | -1.329091 | -0.605474 |
| 38 | 6  | 0 | 2.097551  | -2.098355 | -1.764575 |
| 39 | 6  | 0 | 2.427618  | -1.818761 | 0.599637  |
| 40 | 6  | 0 | 2.795052  | -3.307921 | -1.723643 |
| 41 | 1  | 0 | 1.717938  | -1.749590 | -2.721631 |
| 42 | 6  | 0 | 3.125086  | -3.026569 | 0.649161  |
| 43 | 1  | 0 | 2.319497  | -1.241847 | 1.514665  |
| 44 | 6  | 0 | 3.306097  | -3.778153 | -0.513795 |
| 45 | 1  | 0 | 2.941230  | -3.879577 | -2.636700 |
| 46 | 1  | 0 | 3.530471  | -3.378798 | 1.594358  |
| 47 | 1  | 0 | 3.848946  | -4.719155 | -0.477820 |
| 48 | 6  | 0 | 1.959964  | 1.620280  | 0.224861  |
| 49 | 6  | 0 | 1.410505  | 2.809996  | 0.744607  |
| 50 | 6  | 0 | 3.359460  | 1.473483  | 0.291690  |
| 51 | 6  | 0 | 2.220286  | 3.798082  | 1.307957  |
| 52 | 1  | 0 | 0.336886  | 2.970682  | 0.726281  |
| 53 | 6  | 0 | 4.172957  | 2.461239  | 0.850483  |
| 54 | 1  | 0 | 3.826728  | 0.571719  | -0.095170 |
| 55 | 6  | 0 | 3.604303  | 3.627524  | 1.362757  |
| 56 | 1  | 0 | 1.766098  | 4.701677  | 1.707042  |
| 57 | 1  | 0 | 5.249985  | 2.316641  | 0.887768  |
| 58 | 1  | 0 | 4.234214  | 4.397025  | 1.802087  |
| 59 | 6  | 0 | 0.807379  | 0.864313  | -2.487189 |
| 60 | 1  | 0 | 0.381244  | 1.870416  | -2.547904 |
| 61 | 1  | 0 | 1.818370  | 0.908549  | -2.909815 |

62            1            0            0.198171    0.207299    -3.113429

---

**S.log**

Zero-point correction=                            0.522797 (Hartree/Particle)

Thermal correction to Energy=                            0.556172

Thermal correction to Enthalpy=                            0.557116

Thermal correction to Gibbs Free Energy=                            0.457638

E(sof.) = -1664.64469774            A.U.

---

| Center<br>Number | Atomic<br>Number | Atomic<br>Type | Coordinates (Angstroms) |           |           |
|------------------|------------------|----------------|-------------------------|-----------|-----------|
|                  |                  |                | X                       | Y         | Z         |
| 1                | 6                | 0              | 0.147077                | -1.014385 | -0.322342 |
| 2                | 6                | 0              | 0.983003                | -0.651598 | -1.609588 |
| 3                | 1                | 0              | 0.503864                | 0.212574  | -2.095800 |
| 4                | 1                | 0              | 0.873828                | -1.475269 | -2.321064 |
| 5                | 6                | 0              | -1.128081               | -1.690108 | -0.793703 |
| 6                | 8                | 0              | -1.316861               | -2.183475 | -1.890834 |
| 7                | 8                | 0              | -2.085179               | -1.711033 | 0.172801  |
| 8                | 6                | 0              | -3.353025               | -2.298494 | -0.198207 |
| 9                | 1                | 0              | -3.184419               | -3.333857 | -0.510832 |
| 10               | 1                | 0              | -3.751187               | -1.750977 | -1.057957 |
| 11               | 6                | 0              | -4.271479               | -2.206812 | 1.005931  |
| 12               | 1                | 0              | -5.246792               | -2.641987 | 0.761340  |
| 13               | 1                | 0              | -3.856958               | -2.752408 | 1.860033  |
| 14               | 1                | 0              | -4.424835               | -1.163669 | 1.300204  |
| 15               | 6                | 0              | 2.447362                | -0.331003 | -1.444799 |
| 16               | 1                | 0              | 2.713277                | 0.438006  | -0.722392 |
| 17               | 6                | 0              | 3.418369                | -0.873580 | -2.187755 |

|    |    |   |           |           |           |
|----|----|---|-----------|-----------|-----------|
| 18 | 1  | 0 | 3.154635  | -1.631898 | -2.928119 |
| 19 | 6  | 0 | 4.874191  | -0.510552 | -2.105267 |
| 20 | 1  | 0 | 5.054633  | 0.254711  | -1.342605 |
| 21 | 1  | 0 | 5.492718  | -1.385842 | -1.863913 |
| 22 | 1  | 0 | 5.242251  | -0.123969 | -3.065672 |
| 23 | 14 | 0 | -0.352496 | 0.576187  | 0.693925  |
| 24 | 6  | 0 | -0.809097 | 0.208146  | 2.495084  |
| 25 | 1  | 0 | 0.008459  | -0.271752 | 3.043347  |
| 26 | 1  | 0 | -1.047967 | 1.138452  | 3.022983  |
| 27 | 1  | 0 | -1.680611 | -0.449713 | 2.547111  |
| 28 | 14 | 0 | 1.070032  | -2.427373 | 0.687525  |
| 29 | 6  | 0 | -0.086164 | -3.317355 | 1.899931  |
| 30 | 1  | 0 | -0.884352 | -3.861440 | 1.384884  |
| 31 | 1  | 0 | 0.504752  | -4.052668 | 2.461828  |
| 32 | 1  | 0 | -0.555452 | -2.644662 | 2.622974  |
| 33 | 6  | 0 | -1.826334 | 1.452773  | -0.135417 |
| 34 | 6  | 0 | -2.232453 | 1.244173  | -1.466803 |
| 35 | 6  | 0 | -2.542413 | 2.410268  | 0.609504  |
| 36 | 6  | 0 | -3.300772 | 1.951060  | -2.024894 |
| 37 | 1  | 0 | -1.724302 | 0.512322  | -2.087607 |
| 38 | 6  | 0 | -3.611137 | 3.119348  | 0.059668  |
| 39 | 1  | 0 | -2.263430 | 2.613914  | 1.640858  |
| 40 | 6  | 0 | -3.994458 | 2.891204  | -1.262932 |
| 41 | 1  | 0 | -3.588996 | 1.764162  | -3.056409 |
| 42 | 1  | 0 | -4.143823 | 3.849515  | 0.664078  |
| 43 | 1  | 0 | -4.825883 | 3.441973  | -1.695432 |
| 44 | 6  | 0 | 1.050258  | 1.860906  | 0.723672  |
| 45 | 6  | 0 | 1.995516  | 1.906497  | 1.765735  |
| 46 | 6  | 0 | 1.162904  | 2.831880  | -0.290509 |
| 47 | 6  | 0 | 3.016506  | 2.858845  | 1.786109  |

|    |   |   |          |           |           |
|----|---|---|----------|-----------|-----------|
| 48 | 1 | 0 | 1.940165 | 1.190291  | 2.581410  |
| 49 | 6 | 0 | 2.181702 | 3.785529  | -0.278686 |
| 50 | 1 | 0 | 0.438414 | 2.848848  | -1.100924 |
| 51 | 6 | 0 | 3.114896 | 3.799180  | 0.759459  |
| 52 | 1 | 0 | 3.731997 | 2.868232  | 2.604731  |
| 53 | 1 | 0 | 2.243913 | 4.520530  | -1.077354 |
| 54 | 1 | 0 | 3.908476 | 4.542016  | 0.772242  |
| 55 | 6 | 0 | 2.542654 | -1.784147 | 1.691800  |
| 56 | 1 | 0 | 3.239841 | -1.193739 | 1.091893  |
| 57 | 1 | 0 | 2.229706 | -1.177505 | 2.548536  |
| 58 | 1 | 0 | 3.092405 | -2.646766 | 2.090452  |
| 59 | 6 | 0 | 1.659881 | -3.731069 | -0.553108 |
| 60 | 1 | 0 | 2.481911 | -3.364212 | -1.174050 |
| 61 | 1 | 0 | 2.013948 | -4.619034 | -0.014299 |
| 62 | 1 | 0 | 0.847192 | -4.045759 | -1.217803 |

---

### Experiment procedure:

Prior to each use, the CD instrument was purged with nitrogen for 20 min and the chiller was set to equilibrate at 25.0 °C. Spectra were collected between 200 and 520 nm with a standard sensitivity of 100 mdeg, a data pitch of 0.5 nm, a band width of 1 nm, a scanning speed of 500 nm/s<sup>-1</sup> and a response of 0.5 s using a quartz cuvette (1 cm path length). The data were adjusted through baseline correction and binomial smoothing. The concentration of (*S*)-**1a** was 6.0×10<sup>-4</sup> M in methanol.

### The experimental ECD spectrum of (*S*)-**1a**

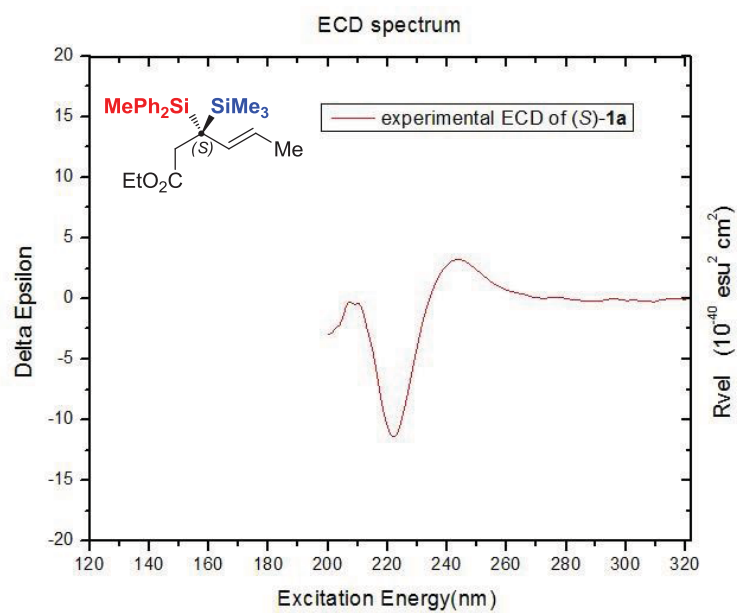

Comparison of experimental ECD spectrum of (*S*)-**1a** in methanol with the calculated ECD spectrum of (*S*)-**1a**.

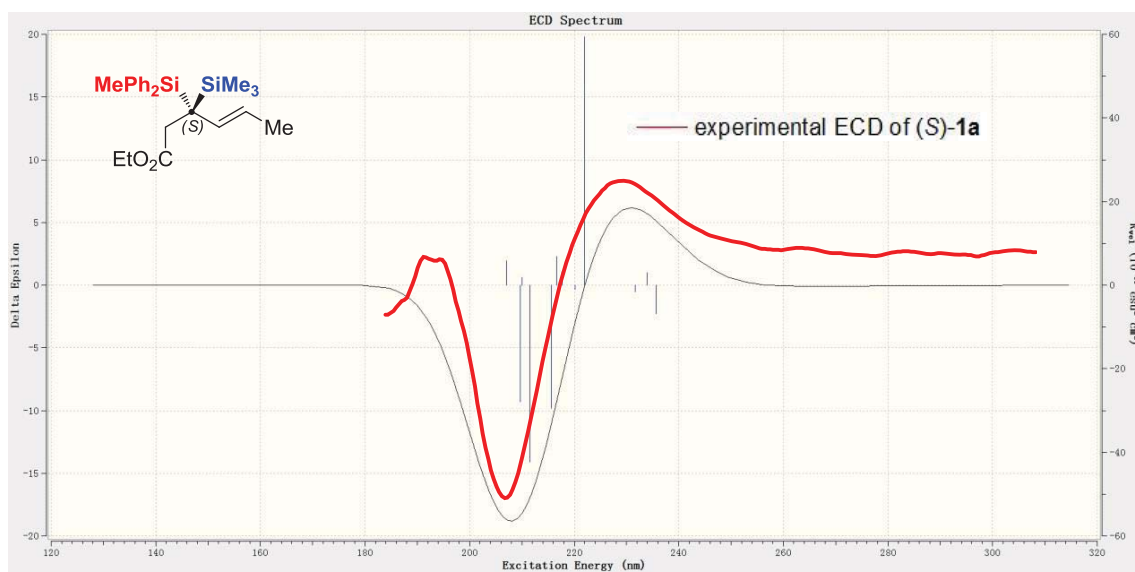



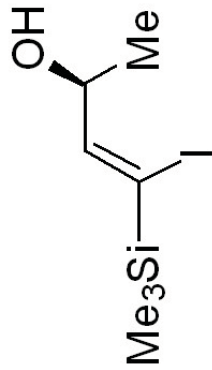

(S)-S1

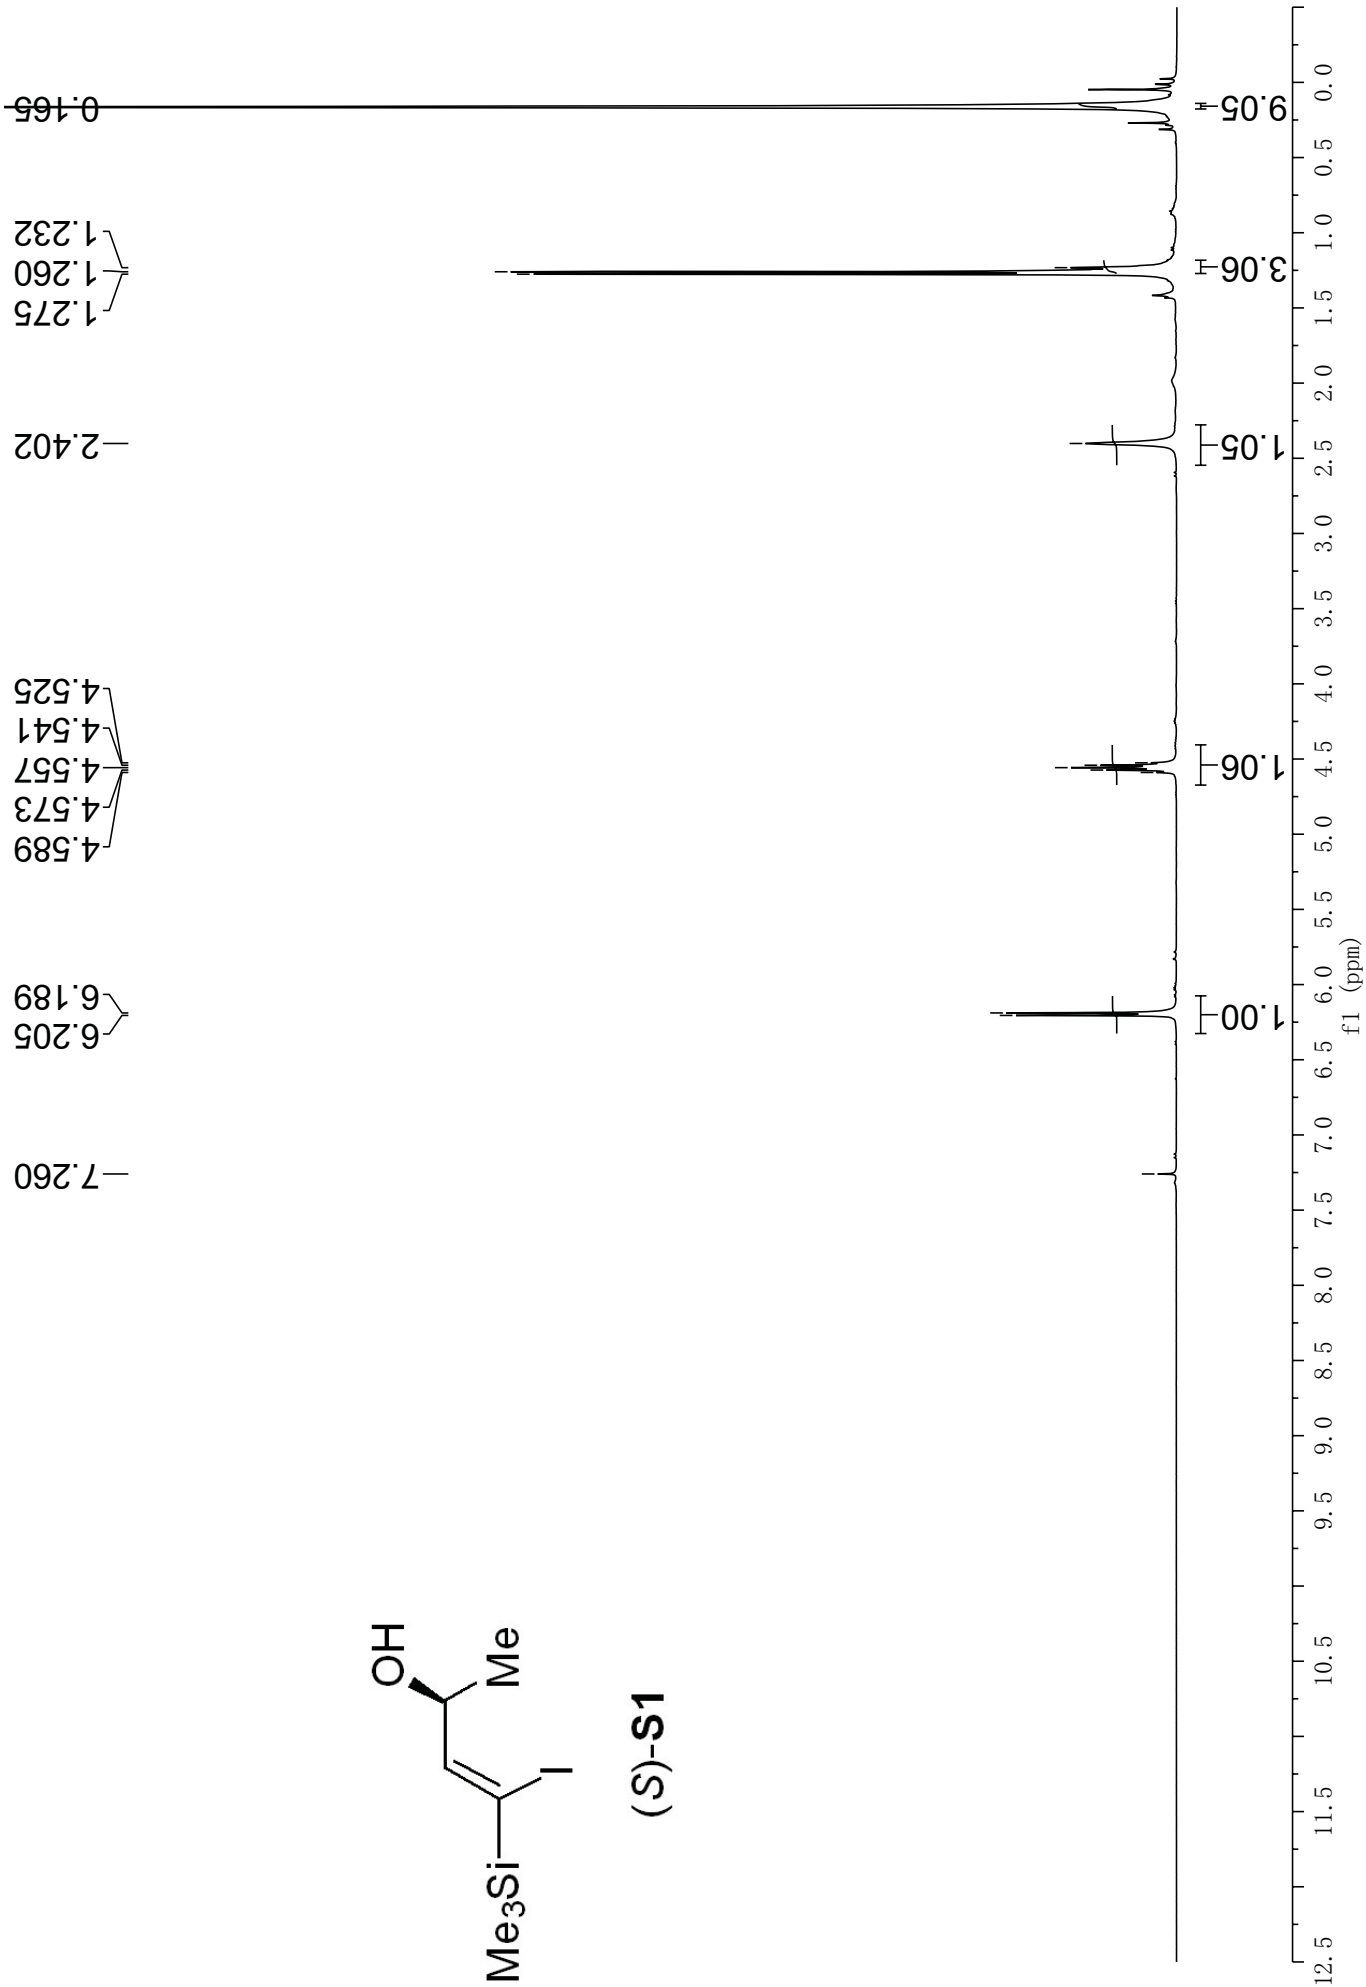

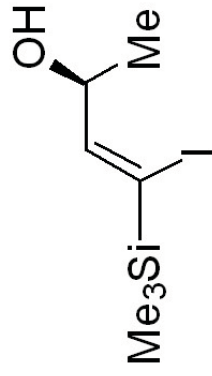

(S)-S1

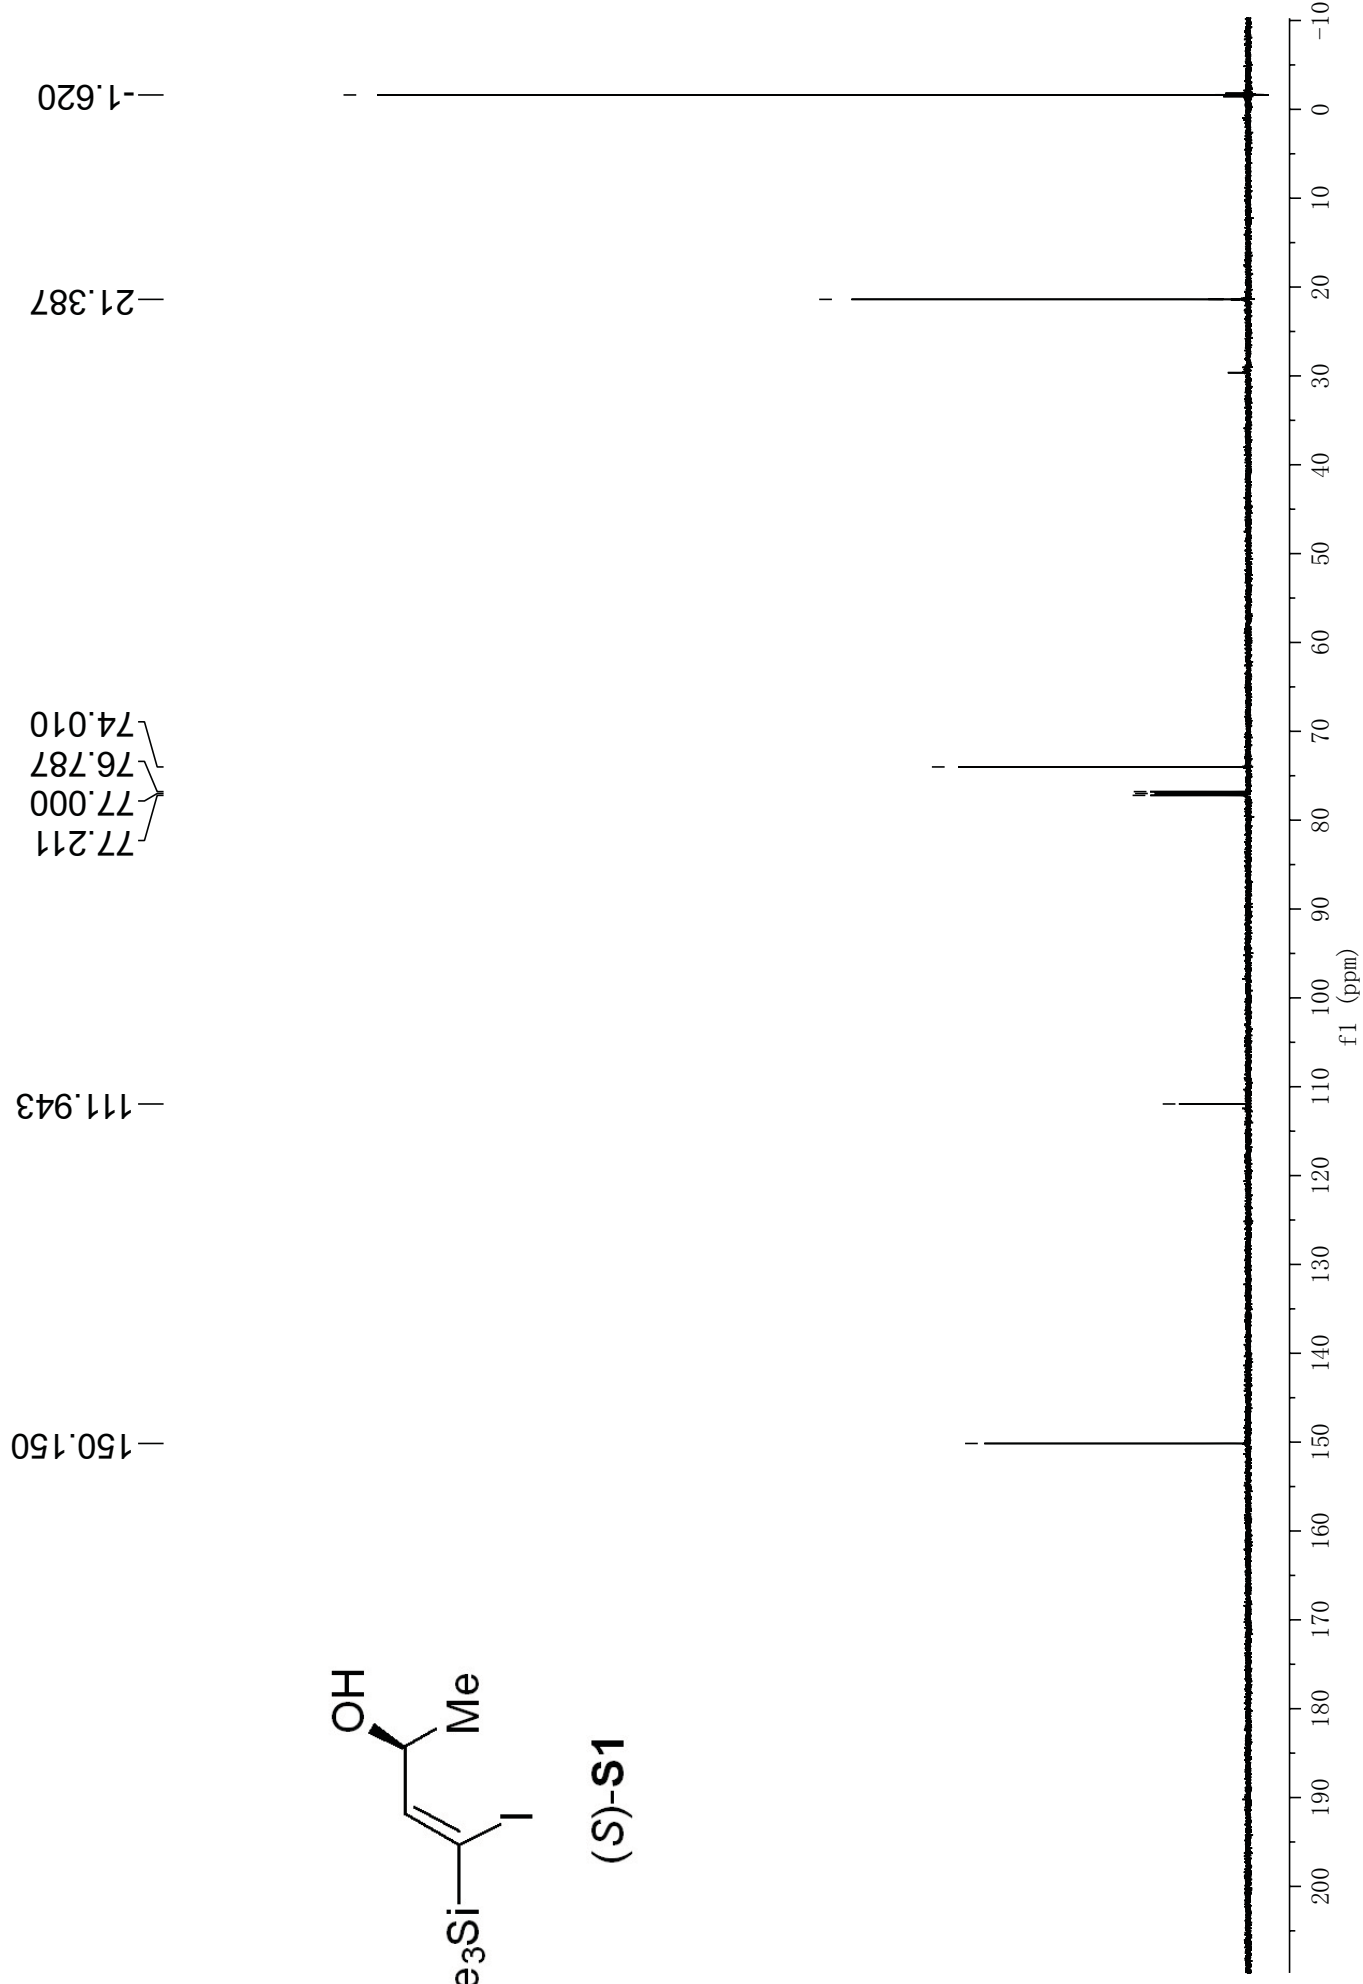

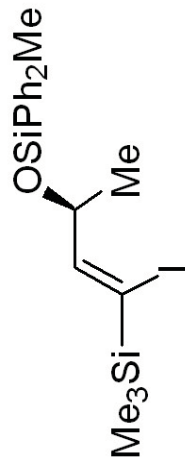

(S)-5

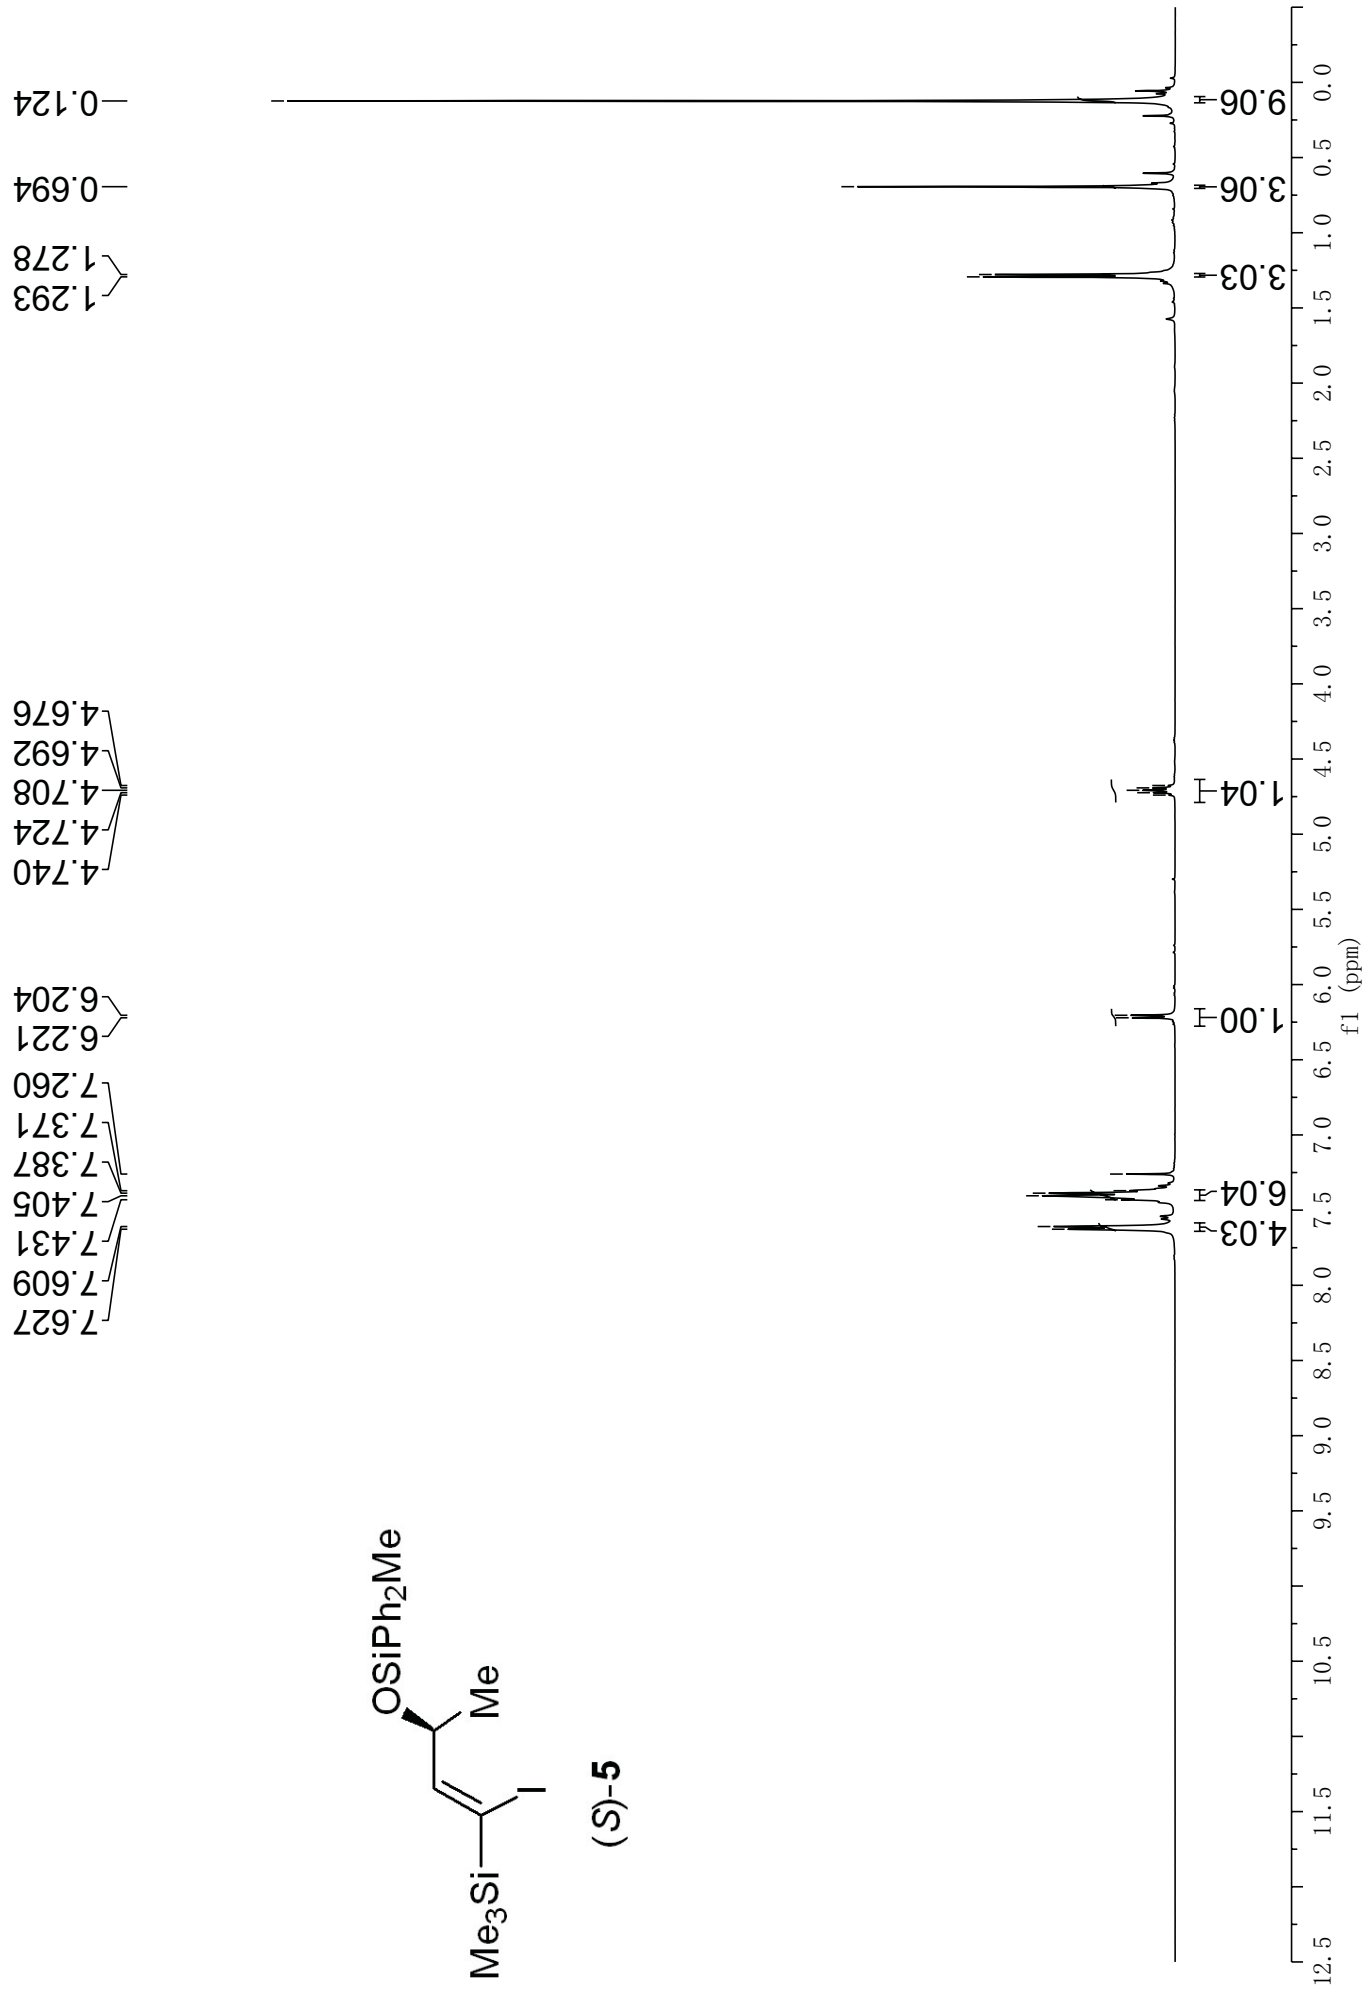

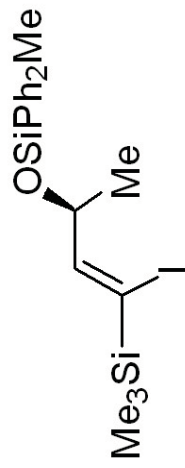

(S)-5

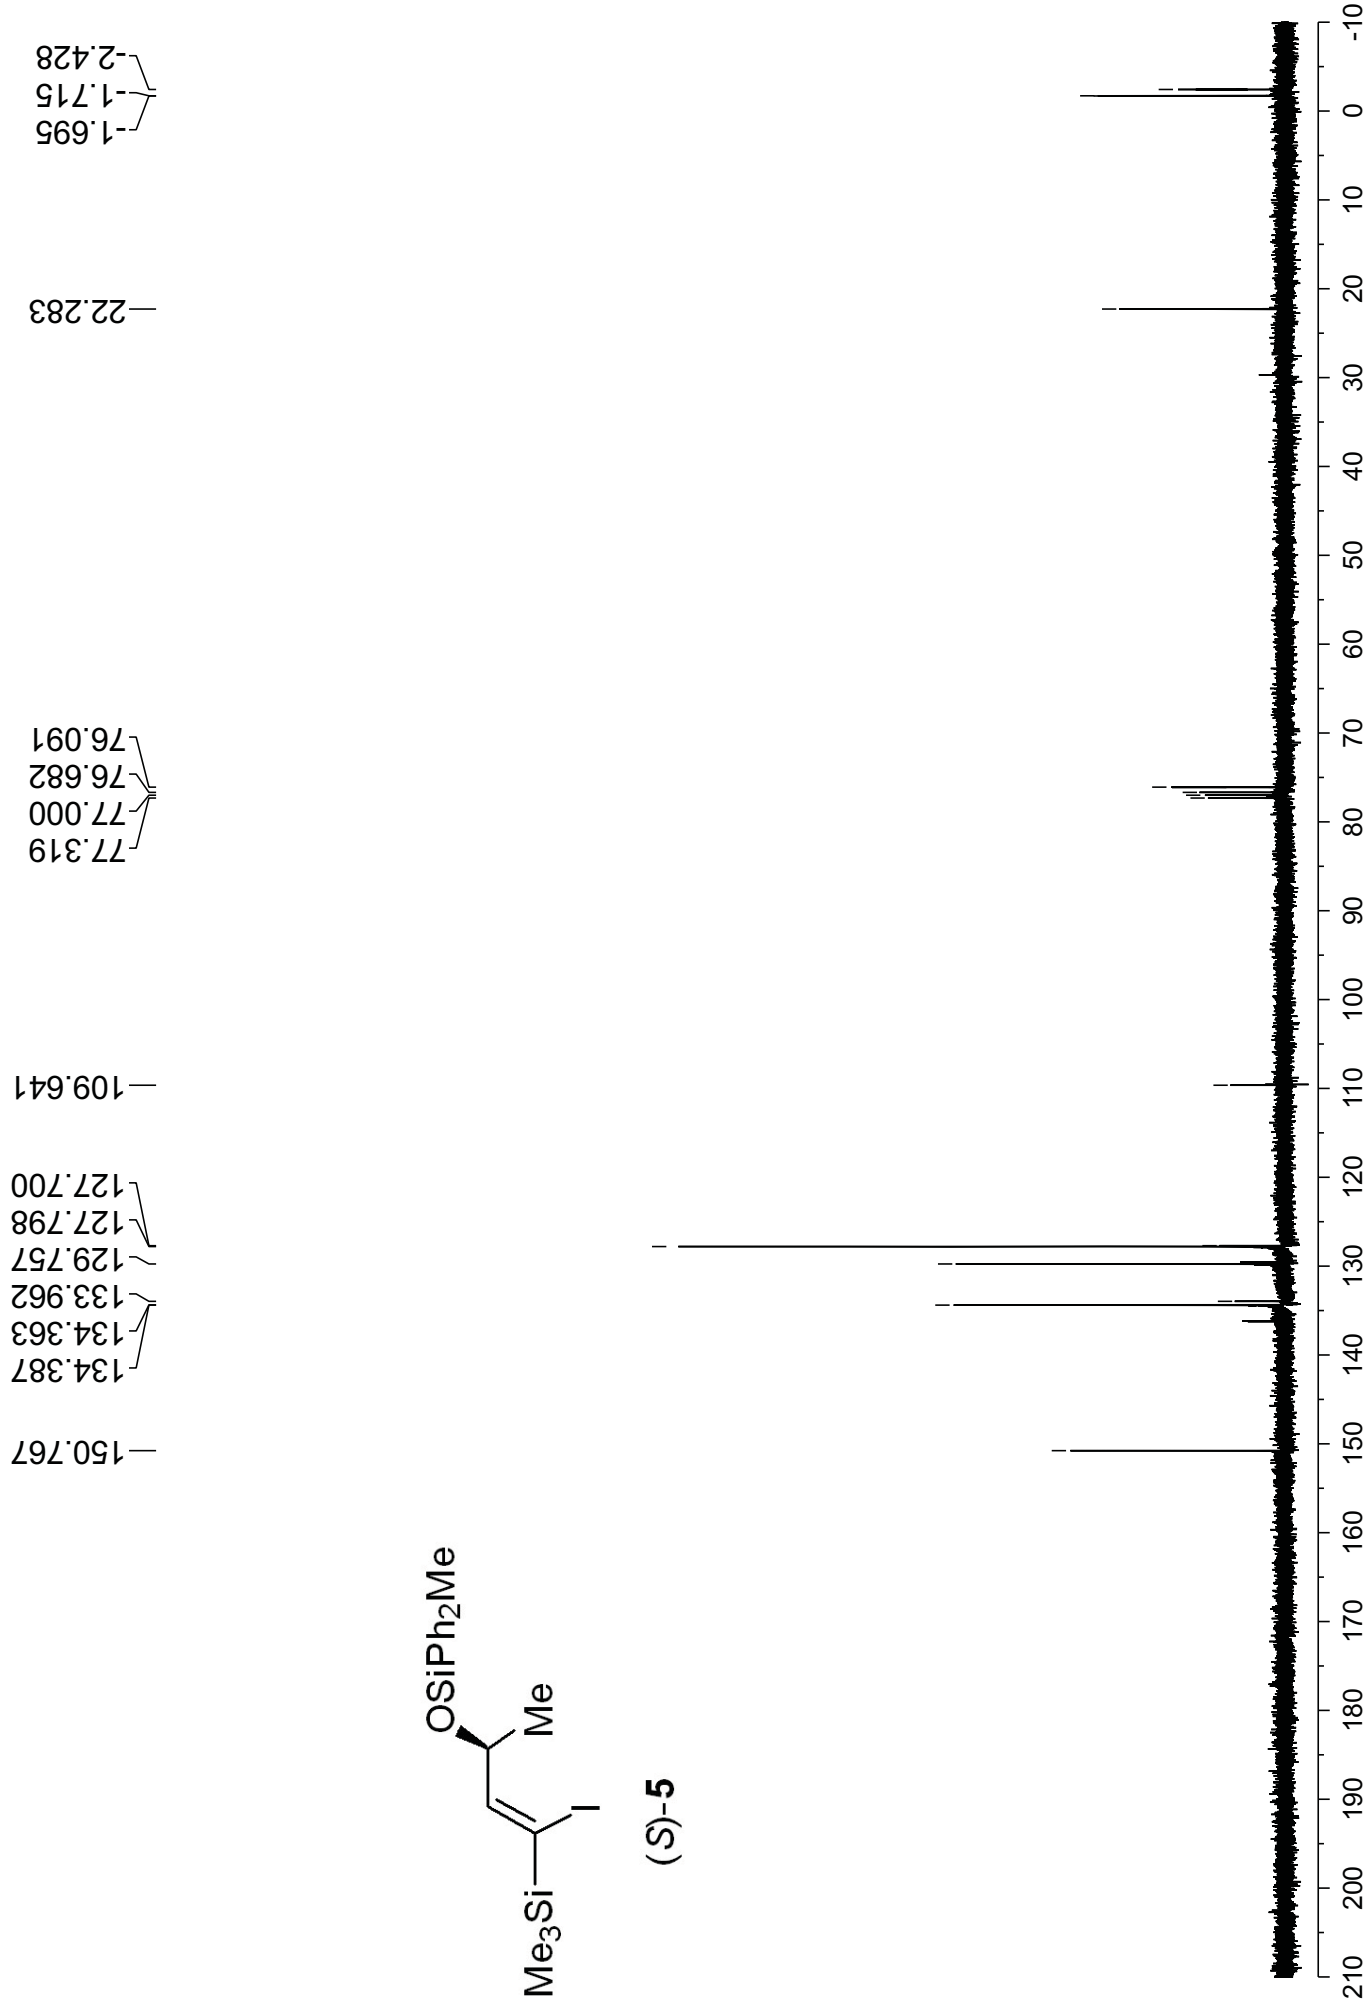

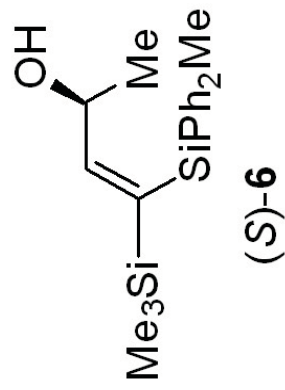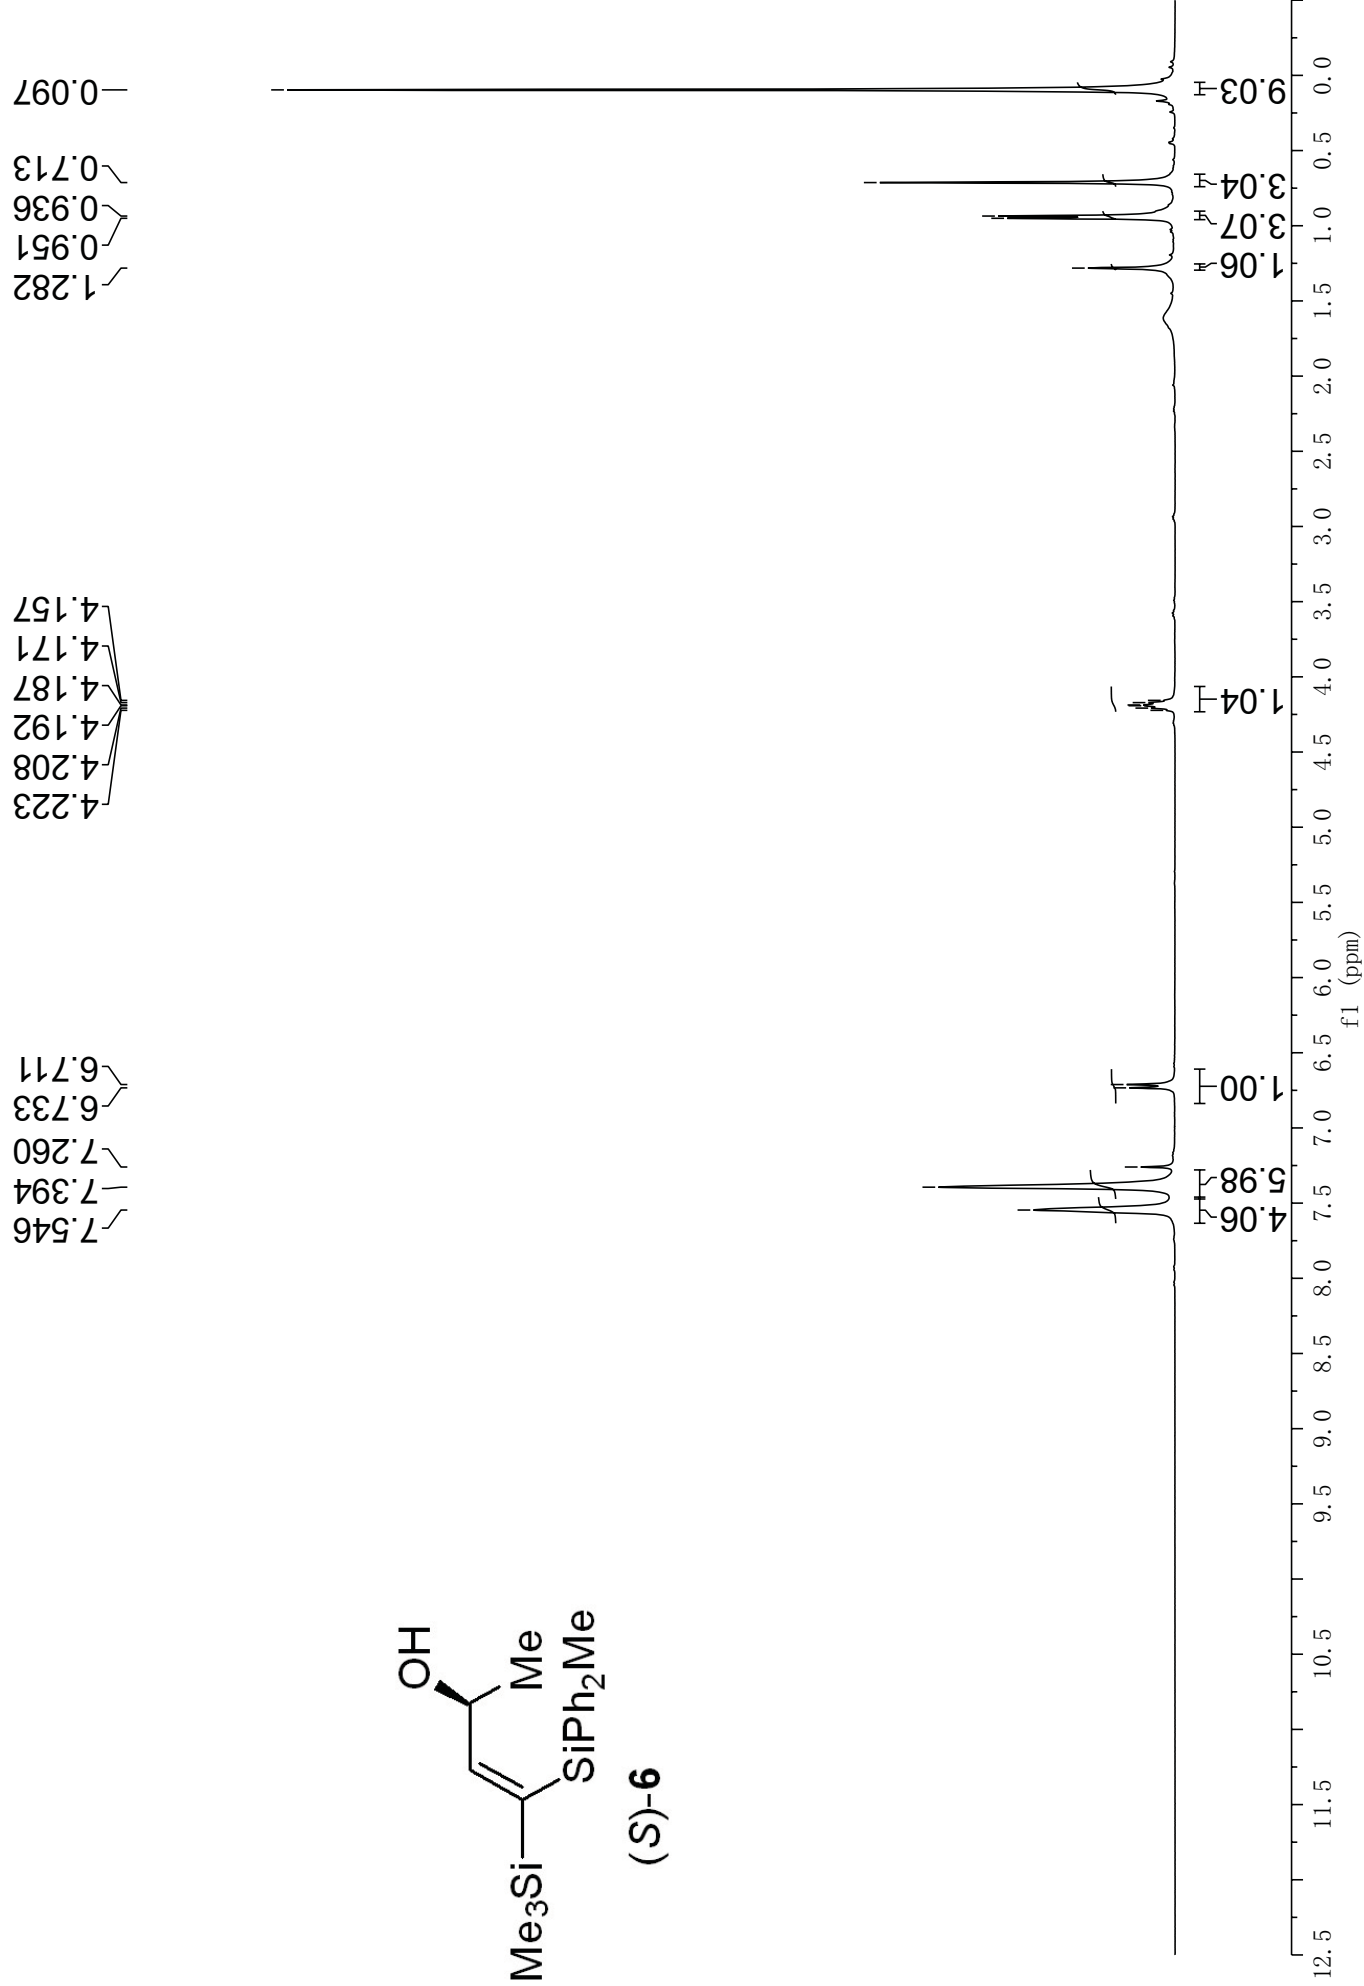

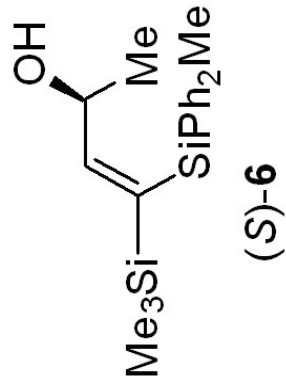

161.884  
138.253  
137.919  
137.718  
134.775  
134.697  
129.283  
129.225  
128.020  
127.912  
77.211  
77.000  
76.788  
68.900  
-21.495  
0.523  
0.150

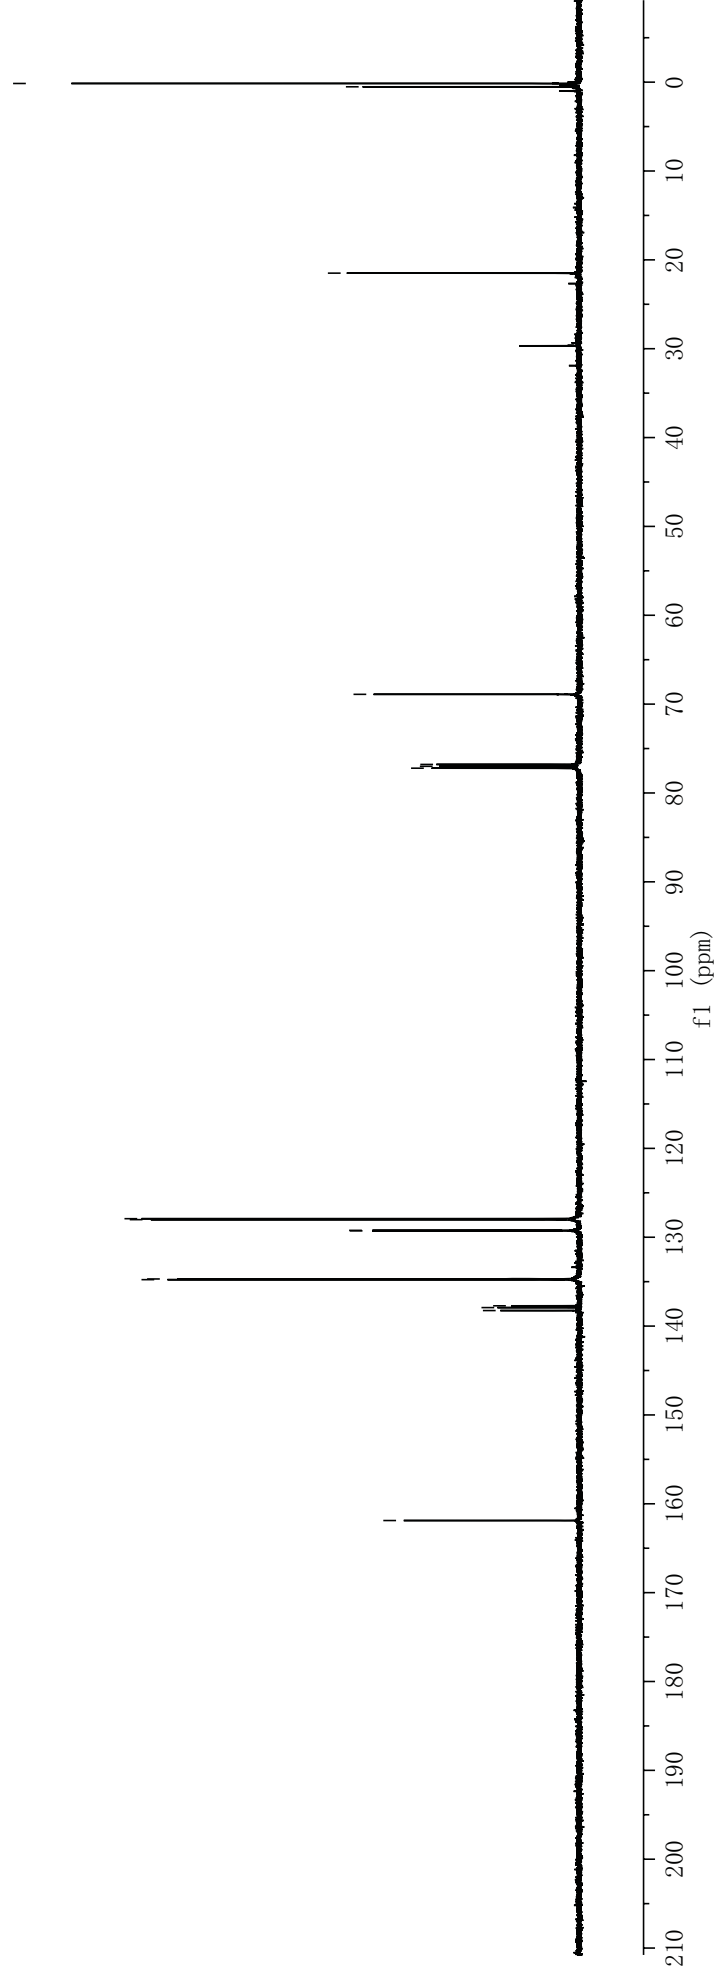

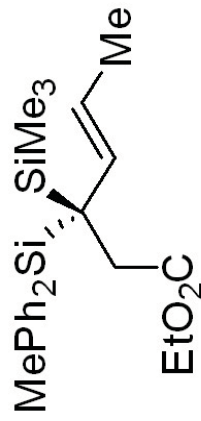

(S)-1a

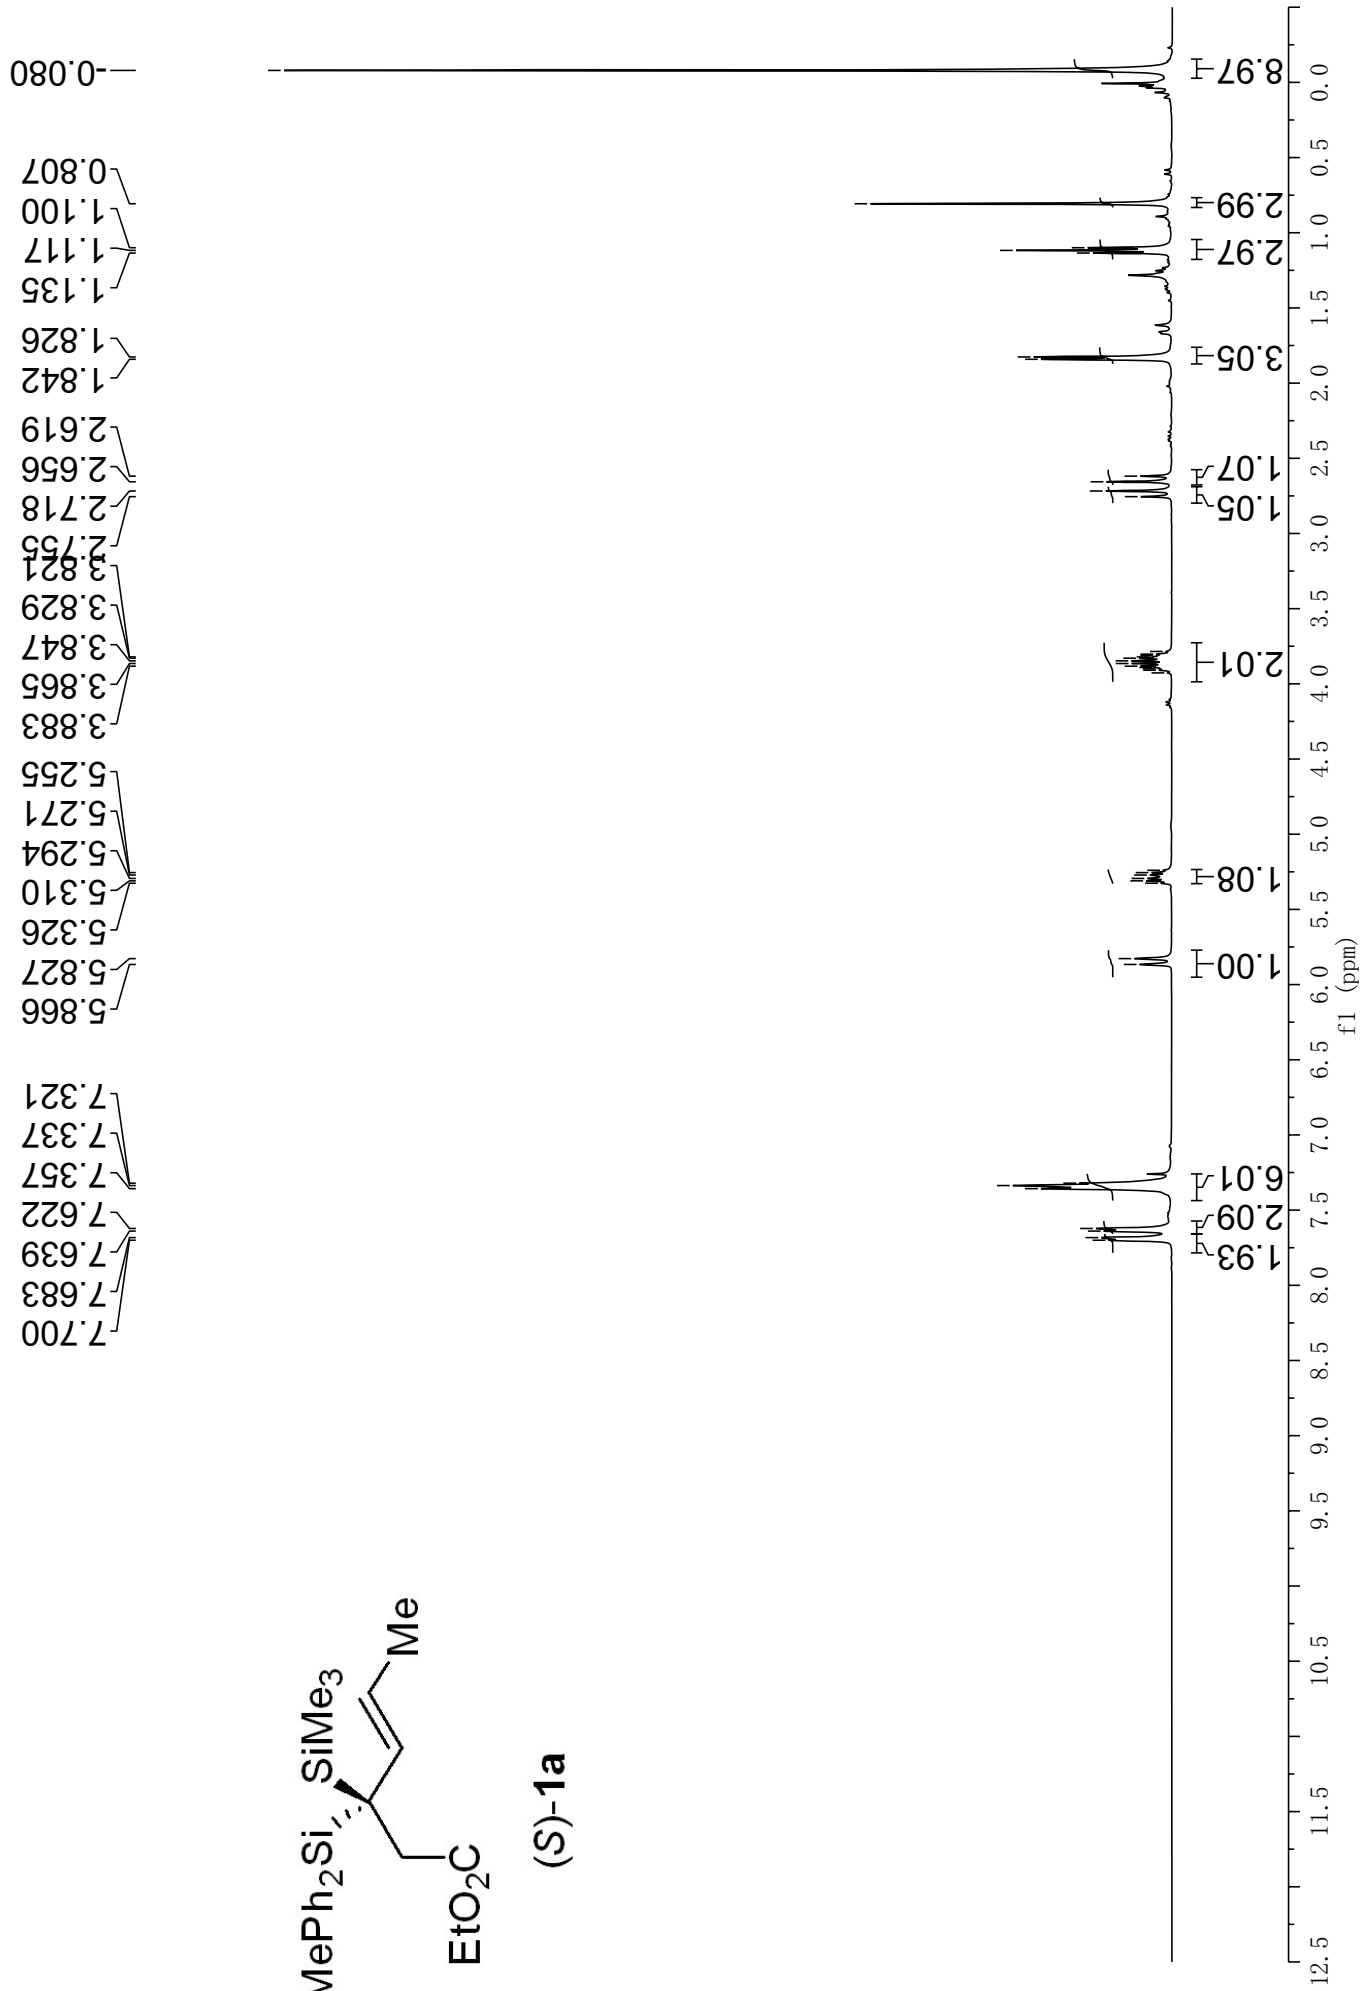

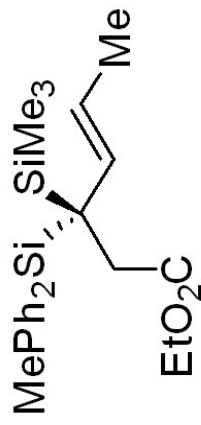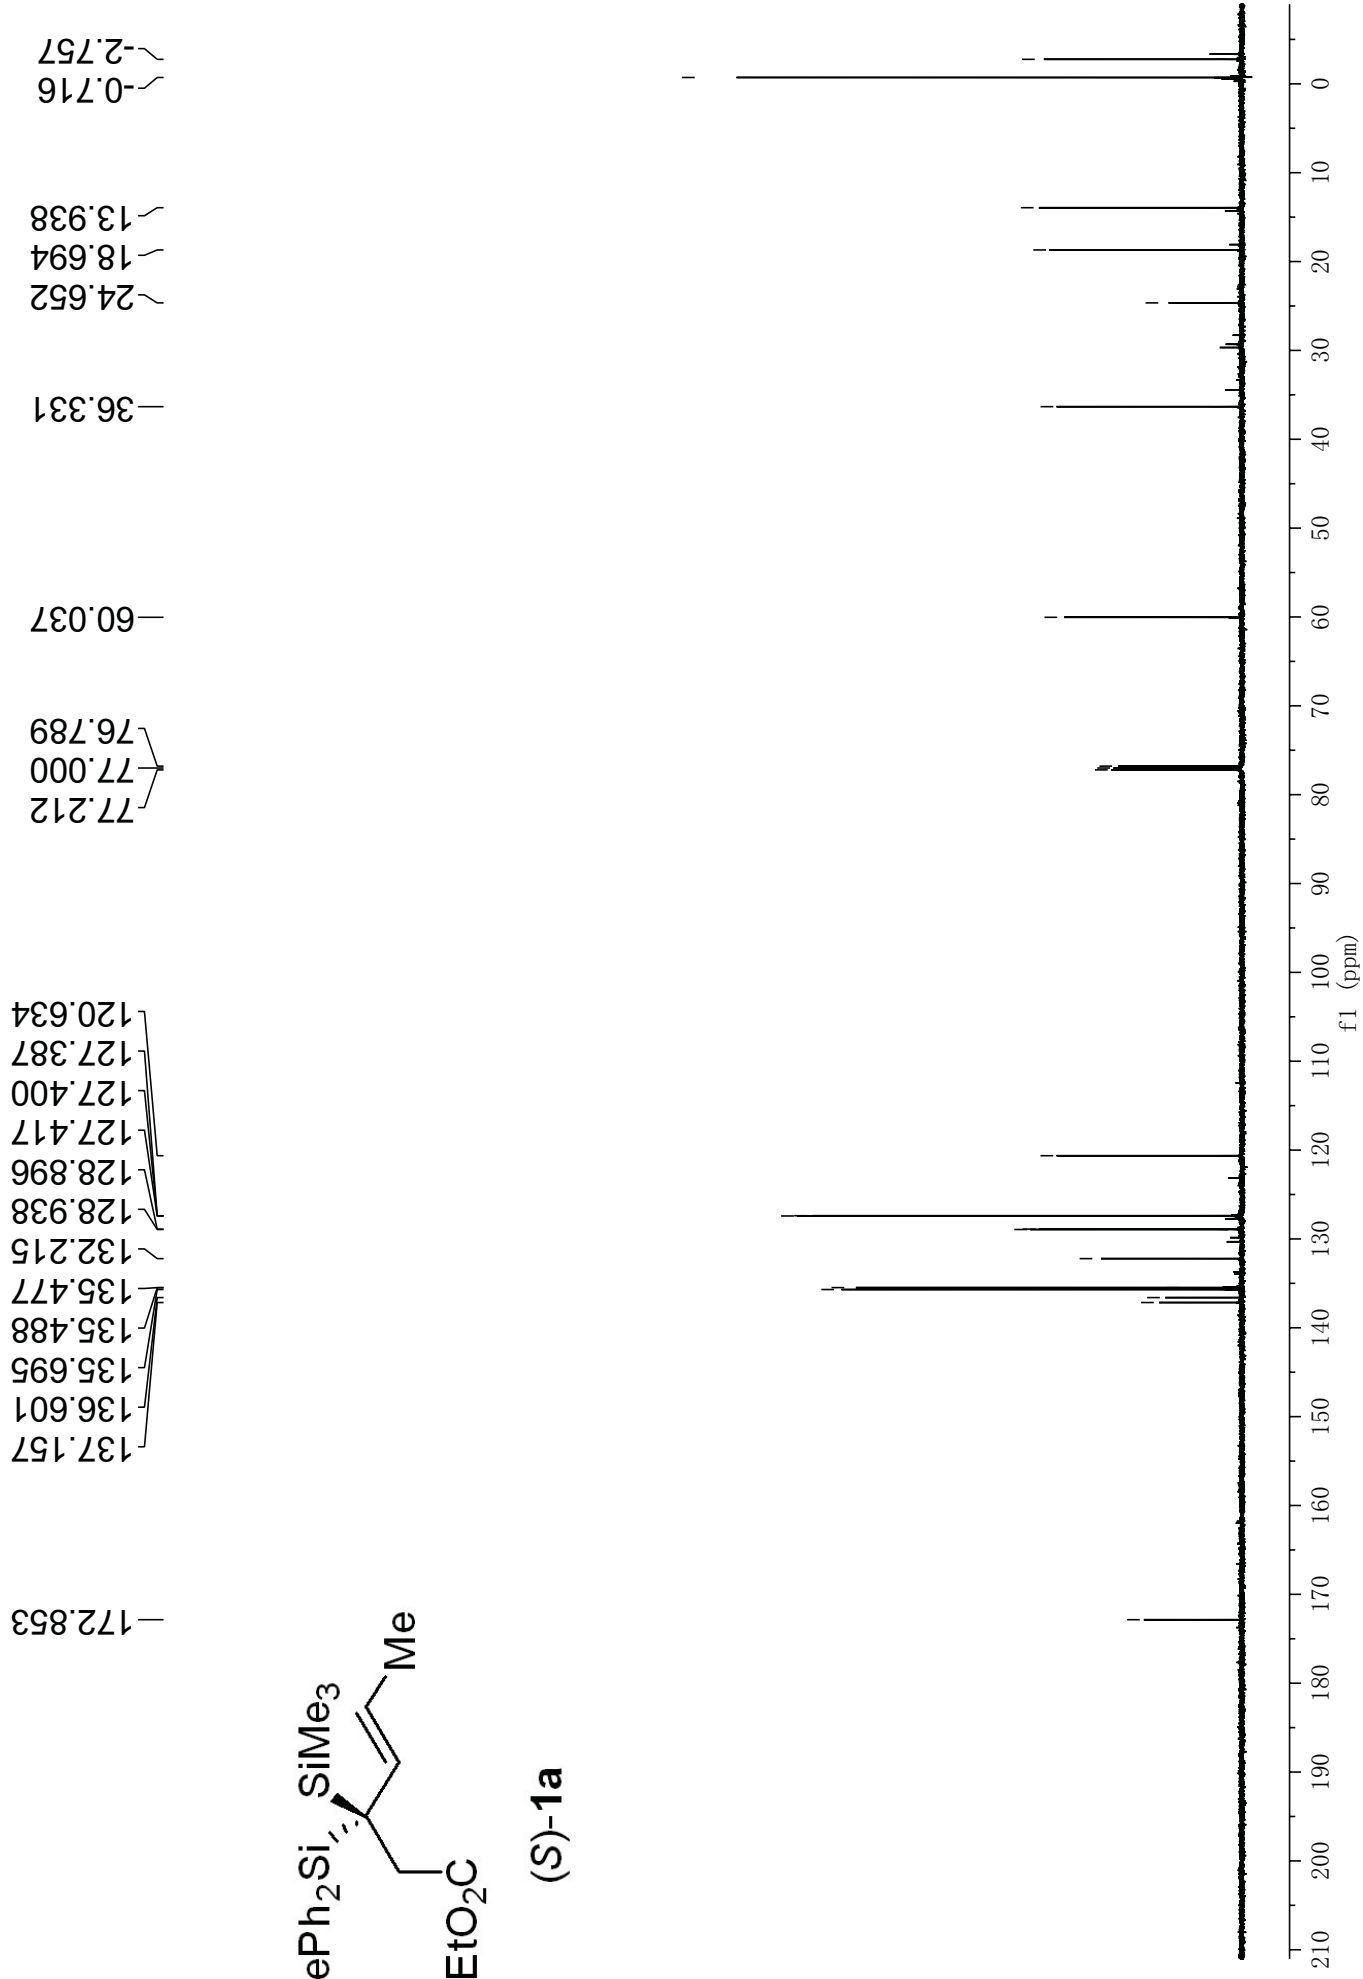



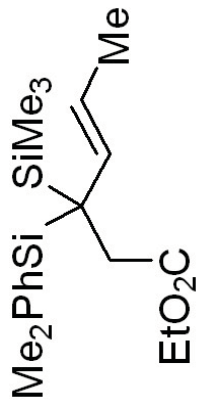

**1b**

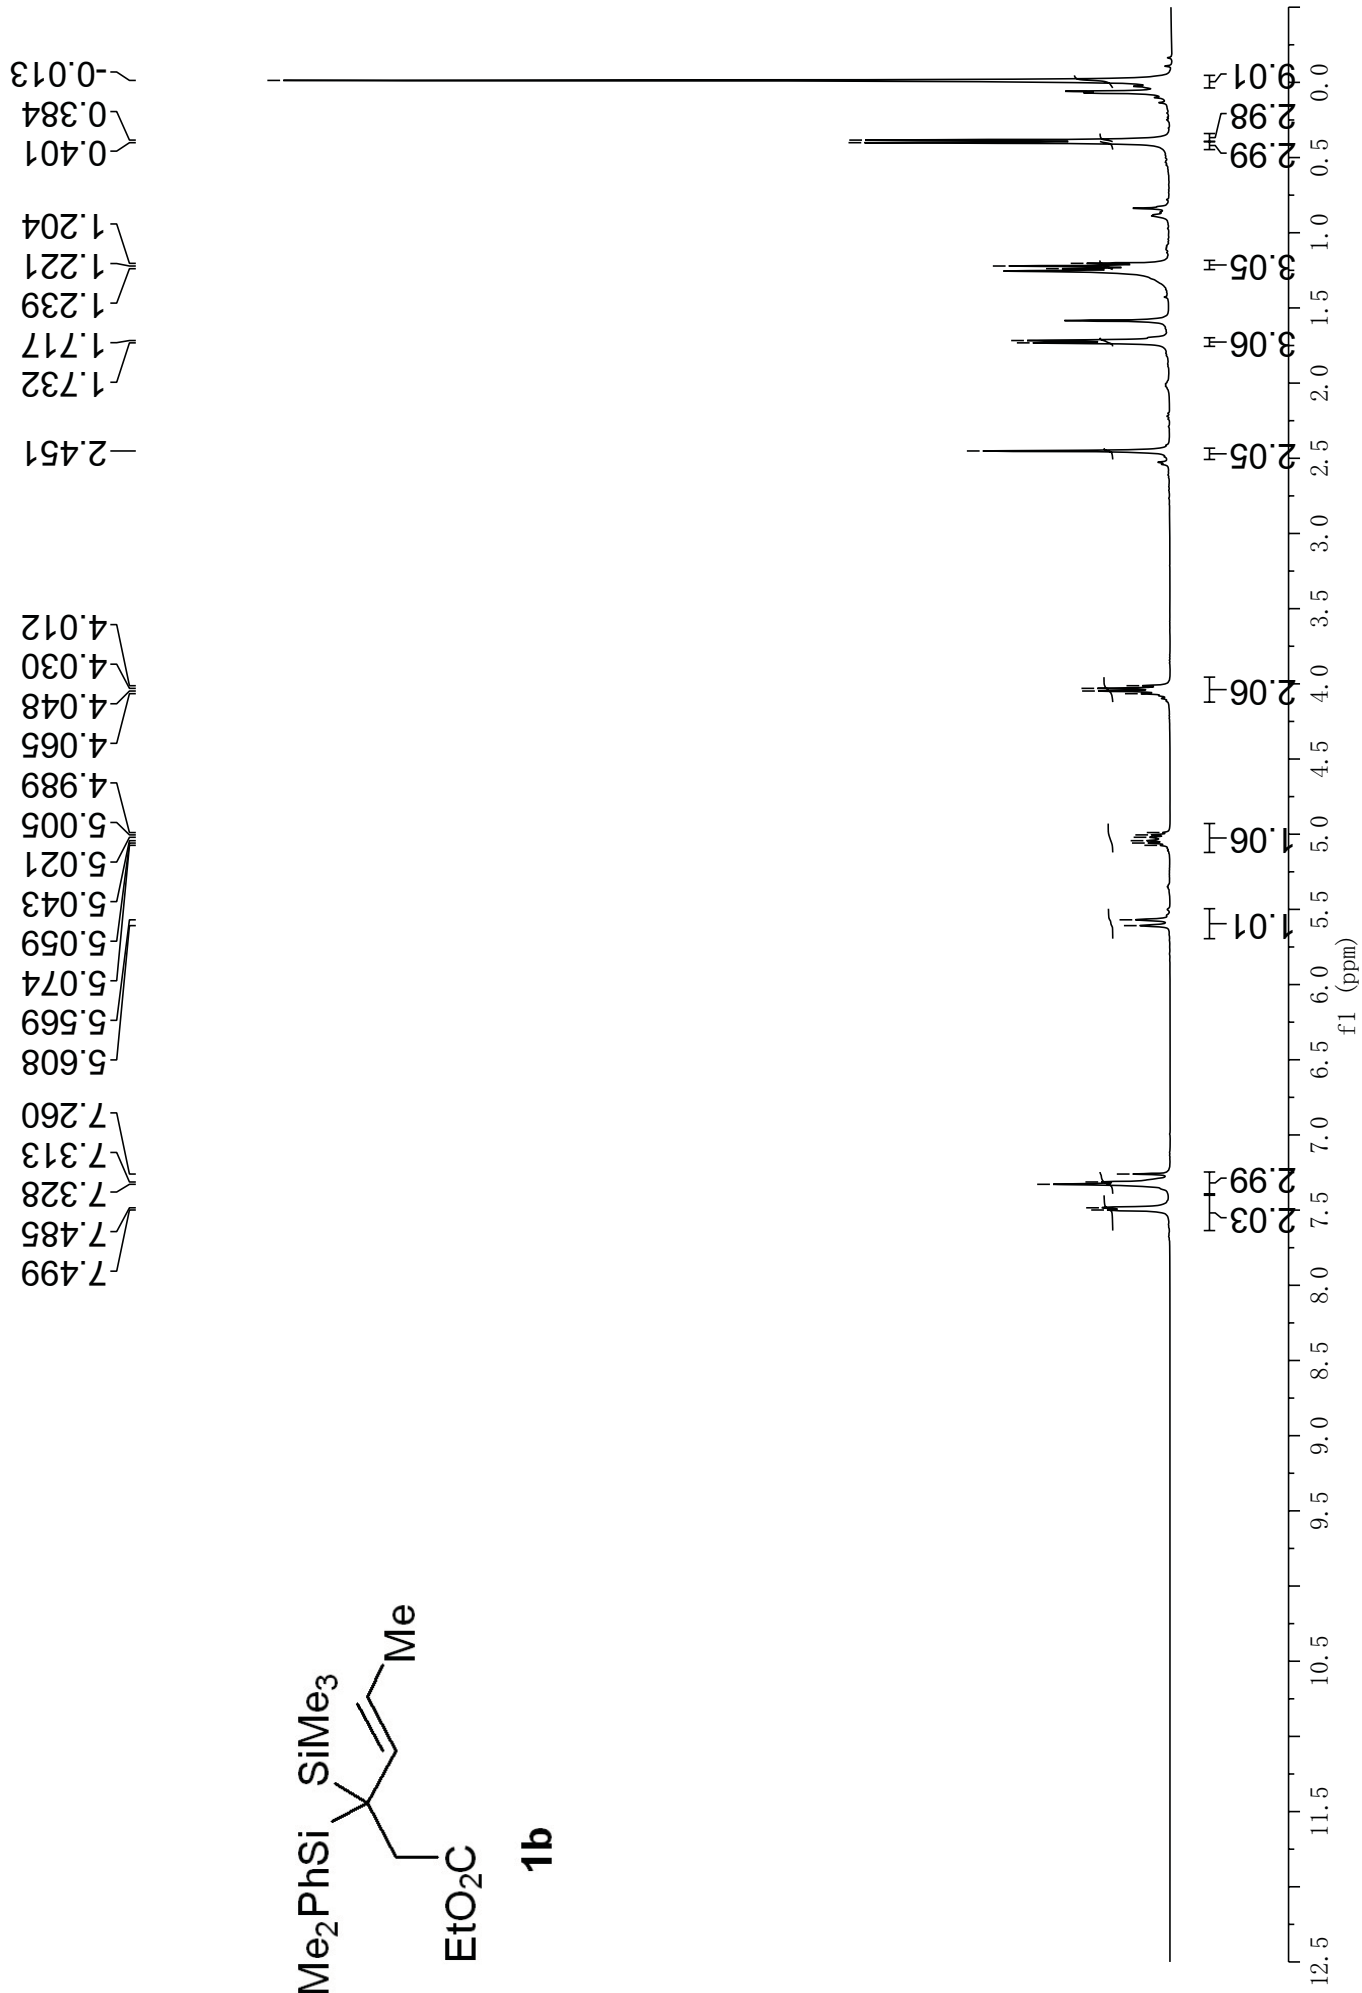

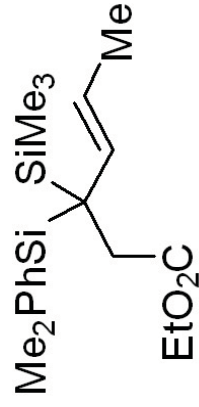

**1b**

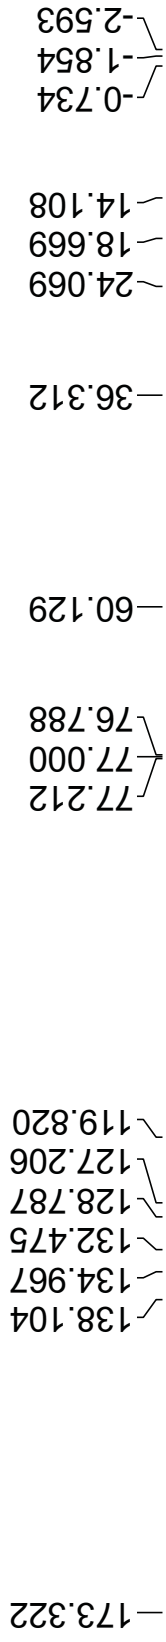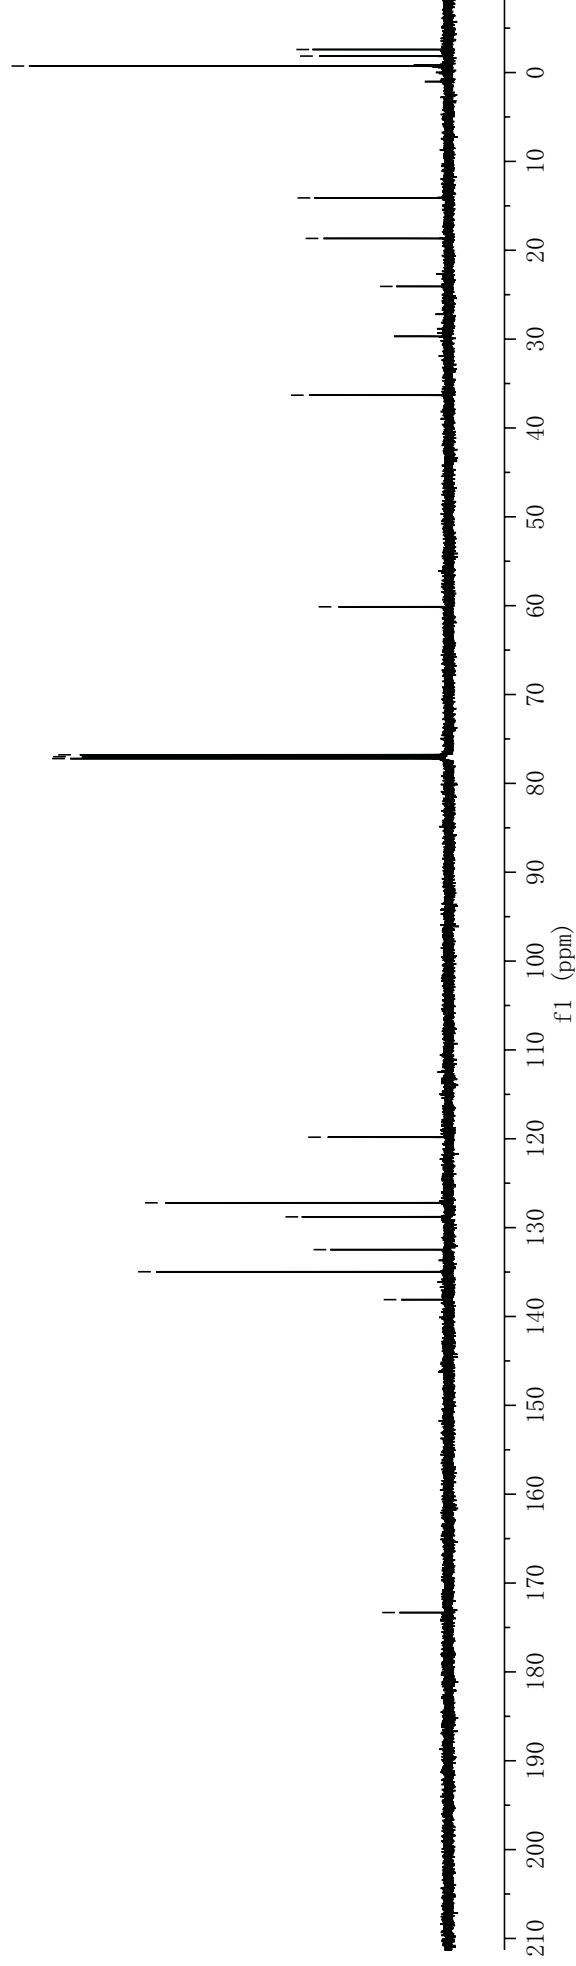

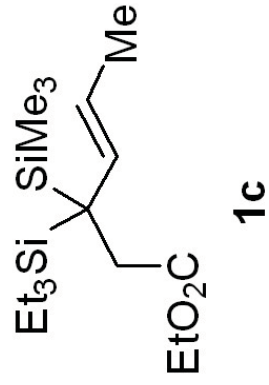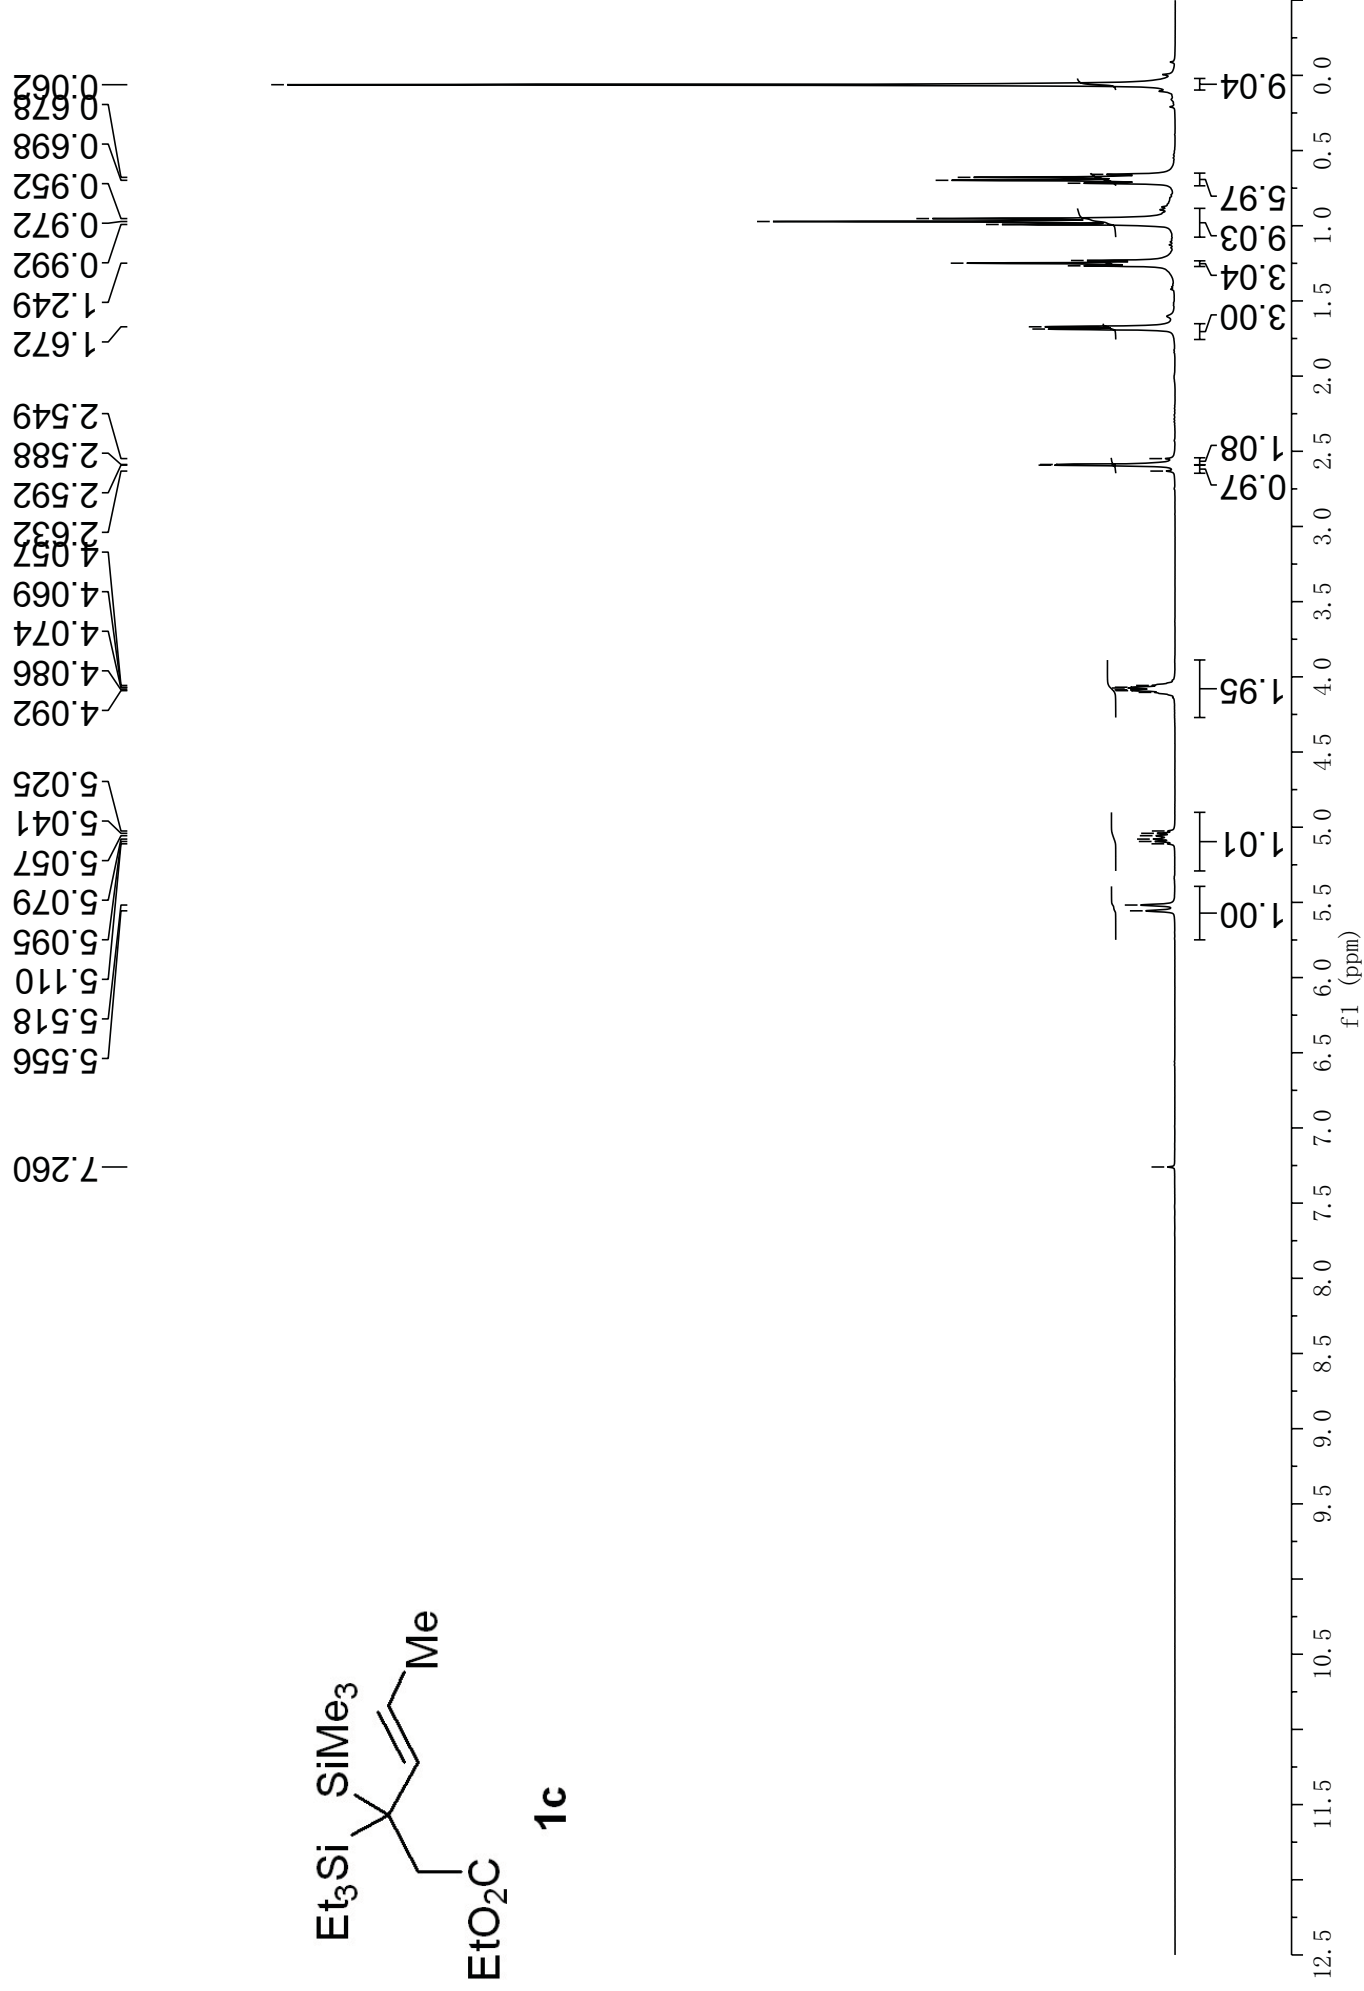

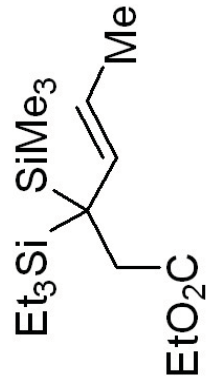

**1c**

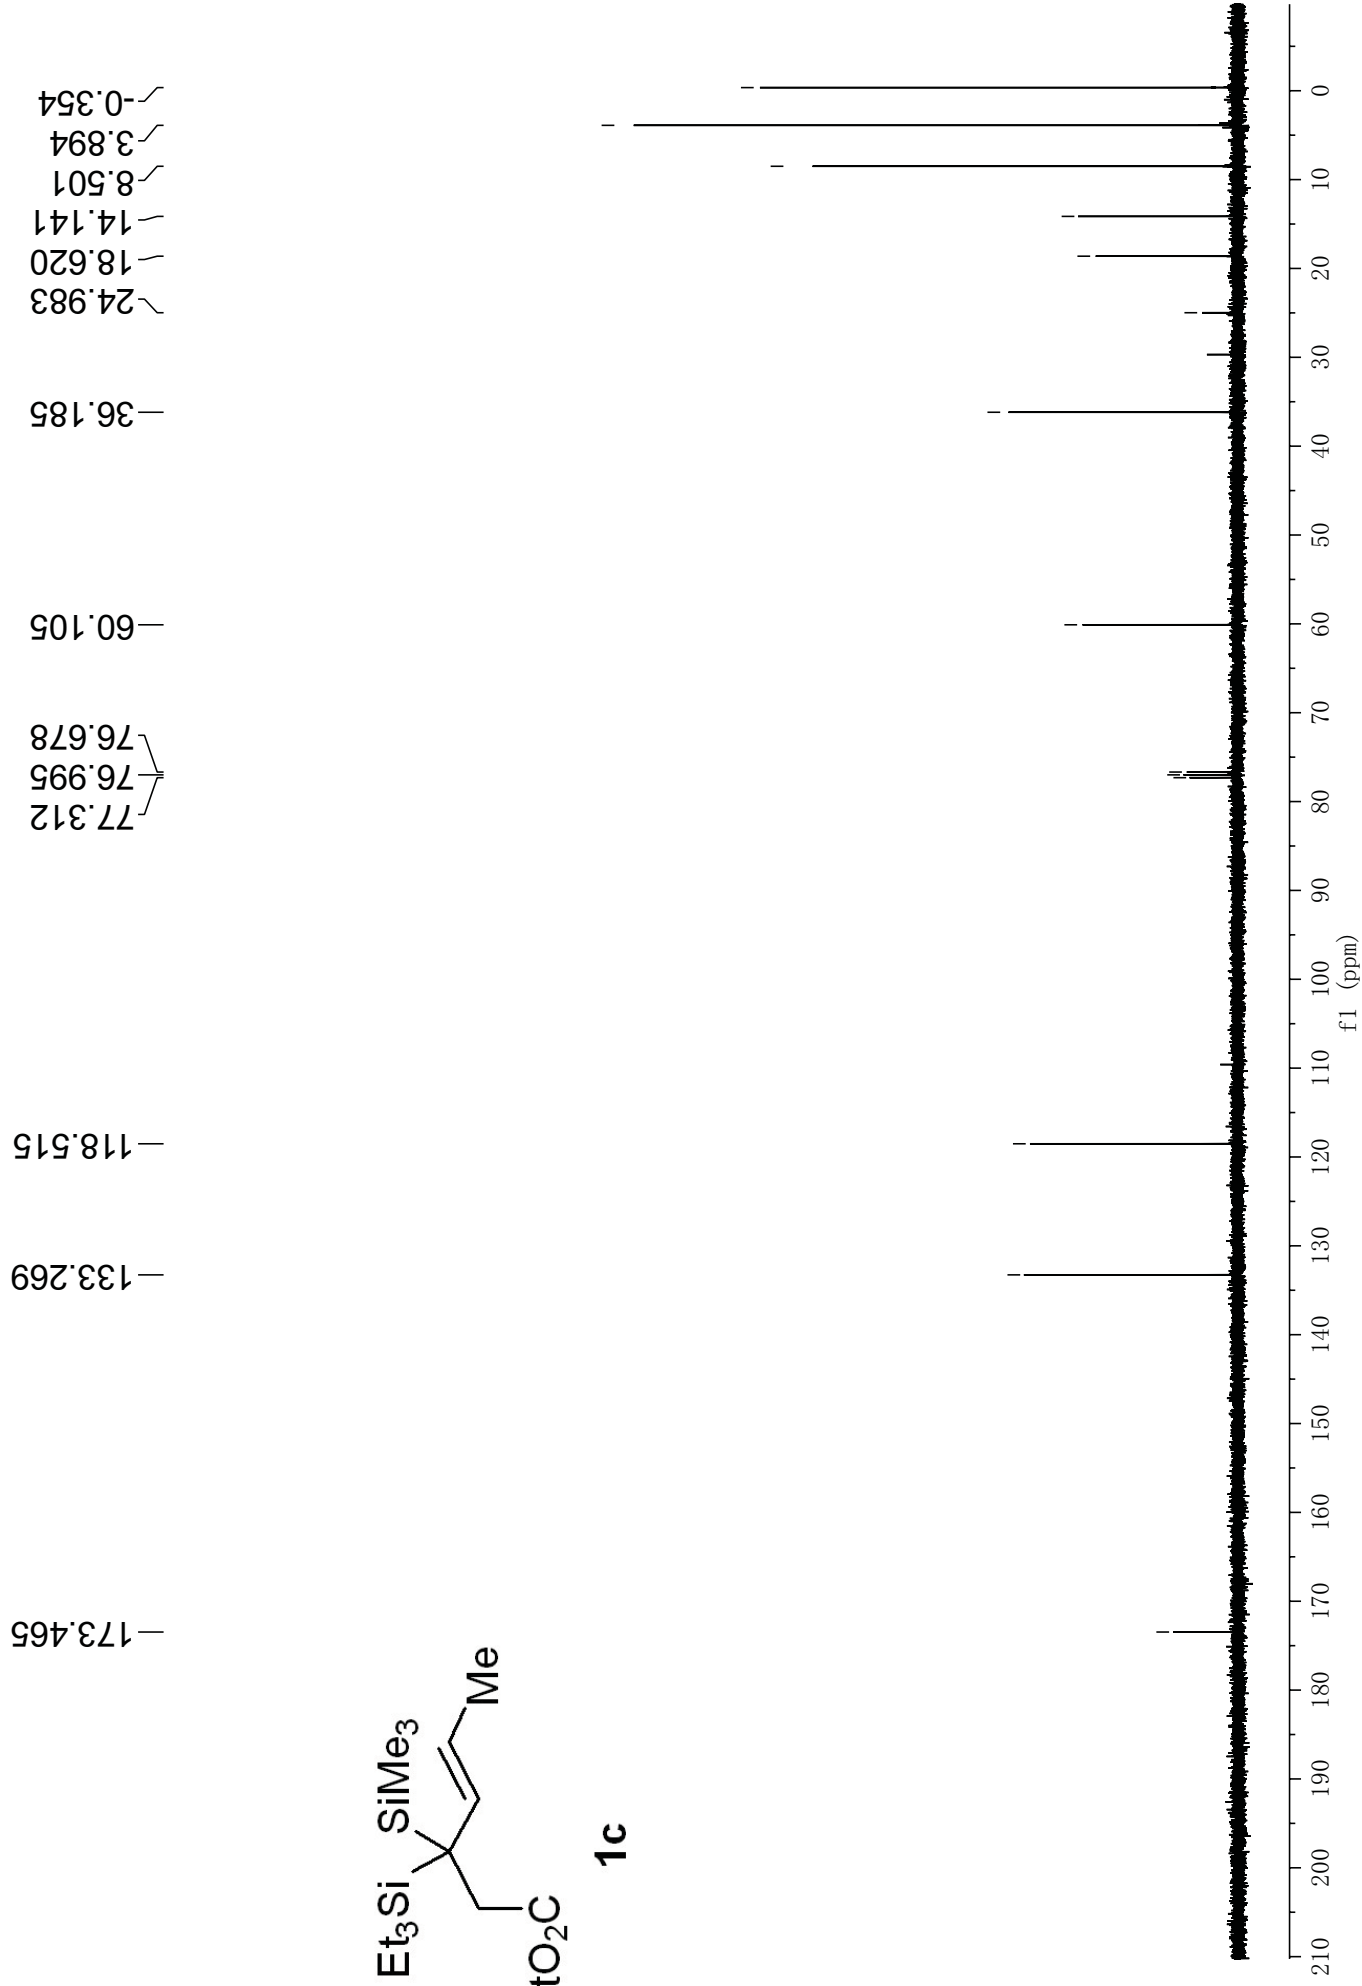

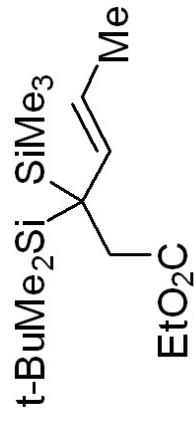

1d

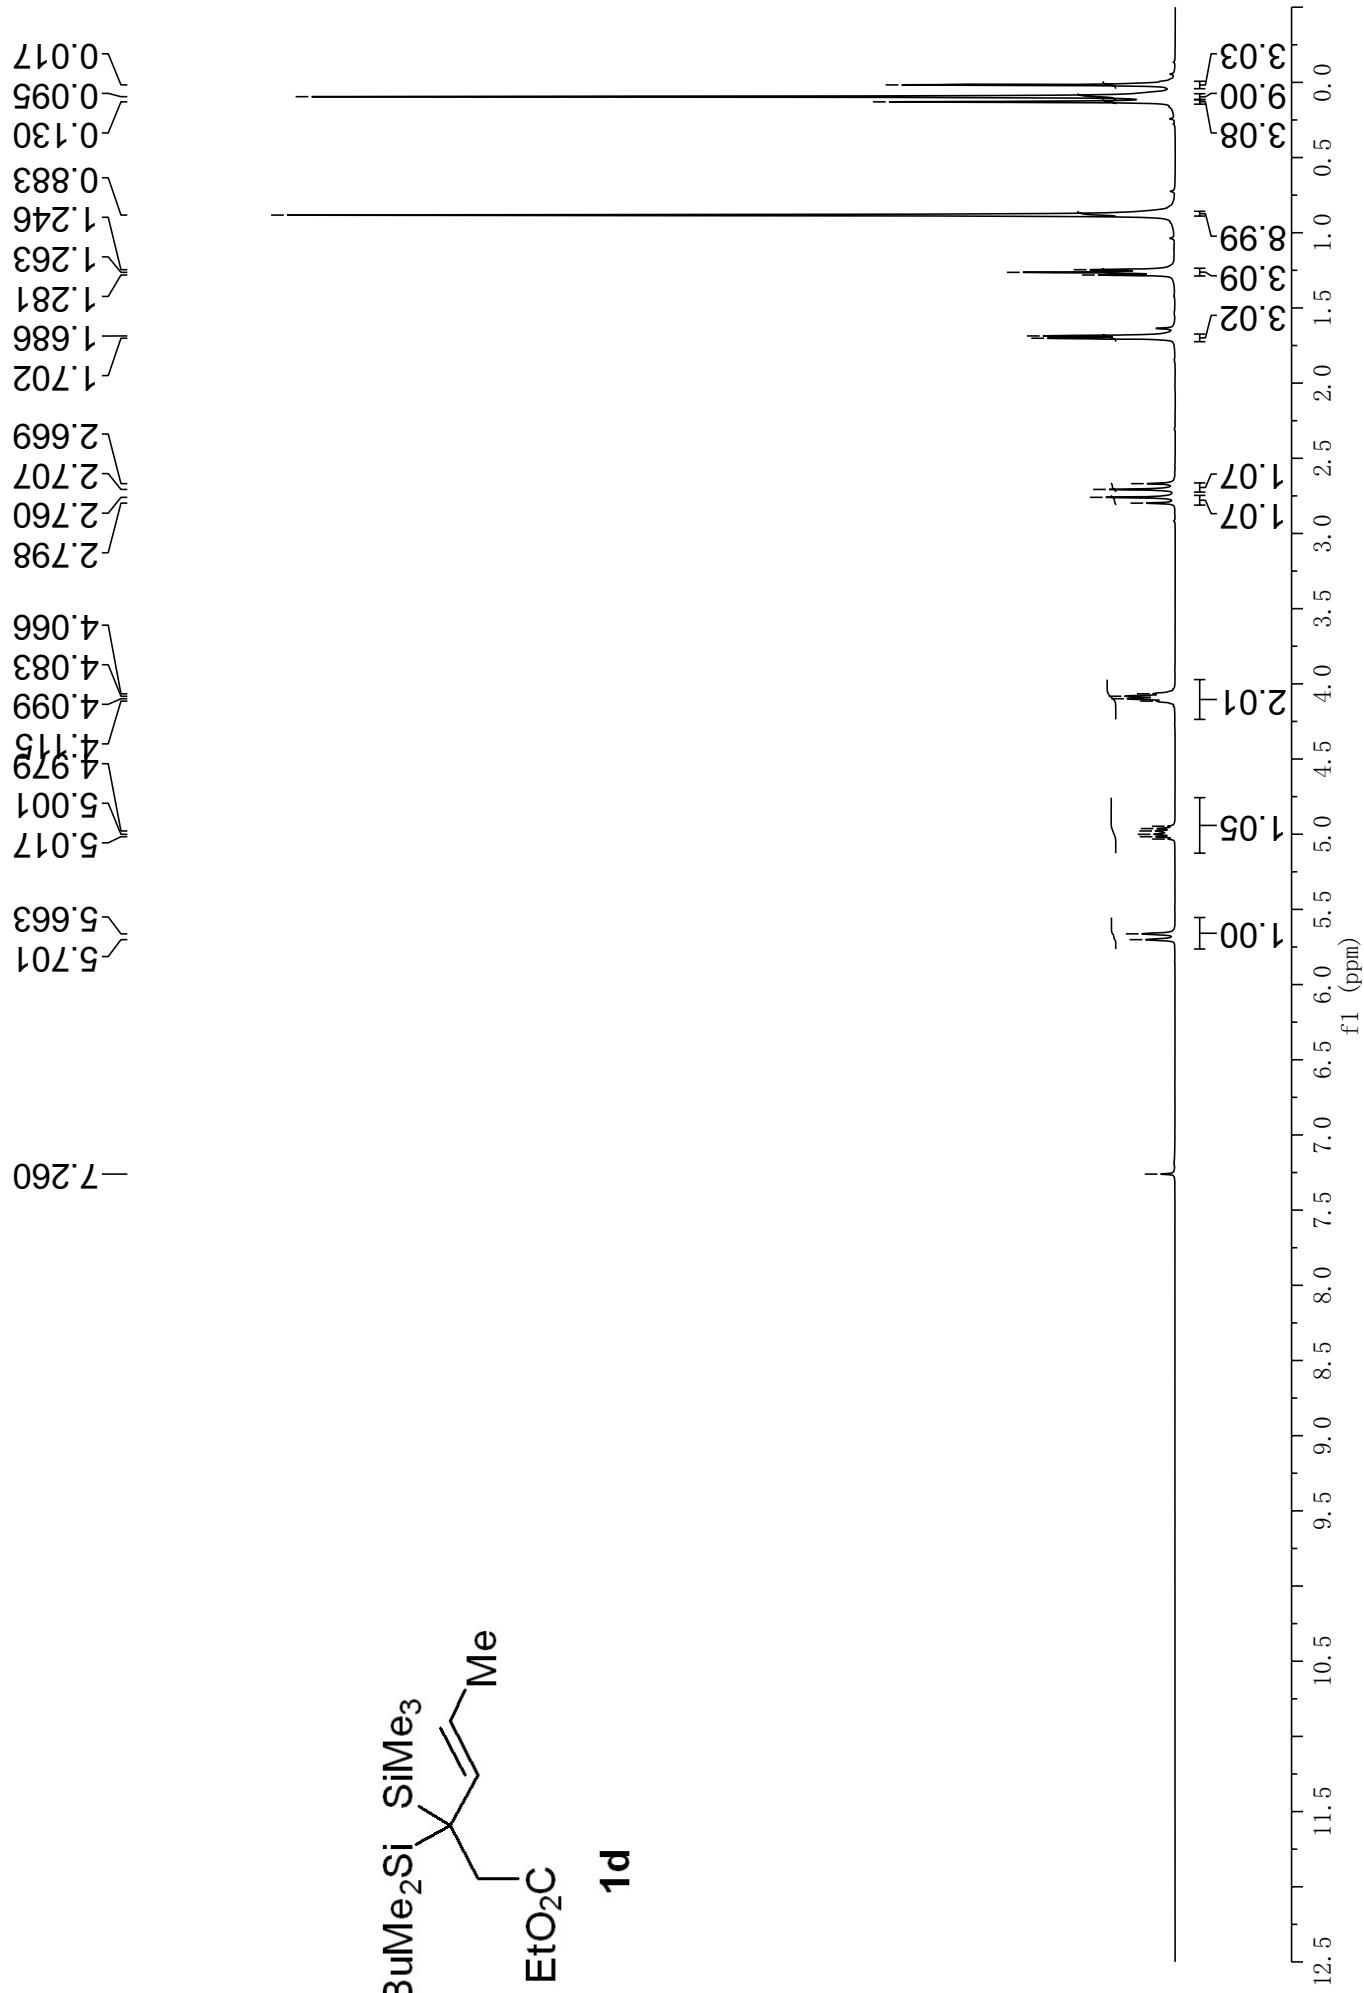

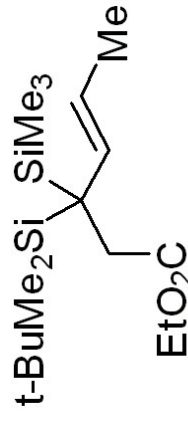

**1d**

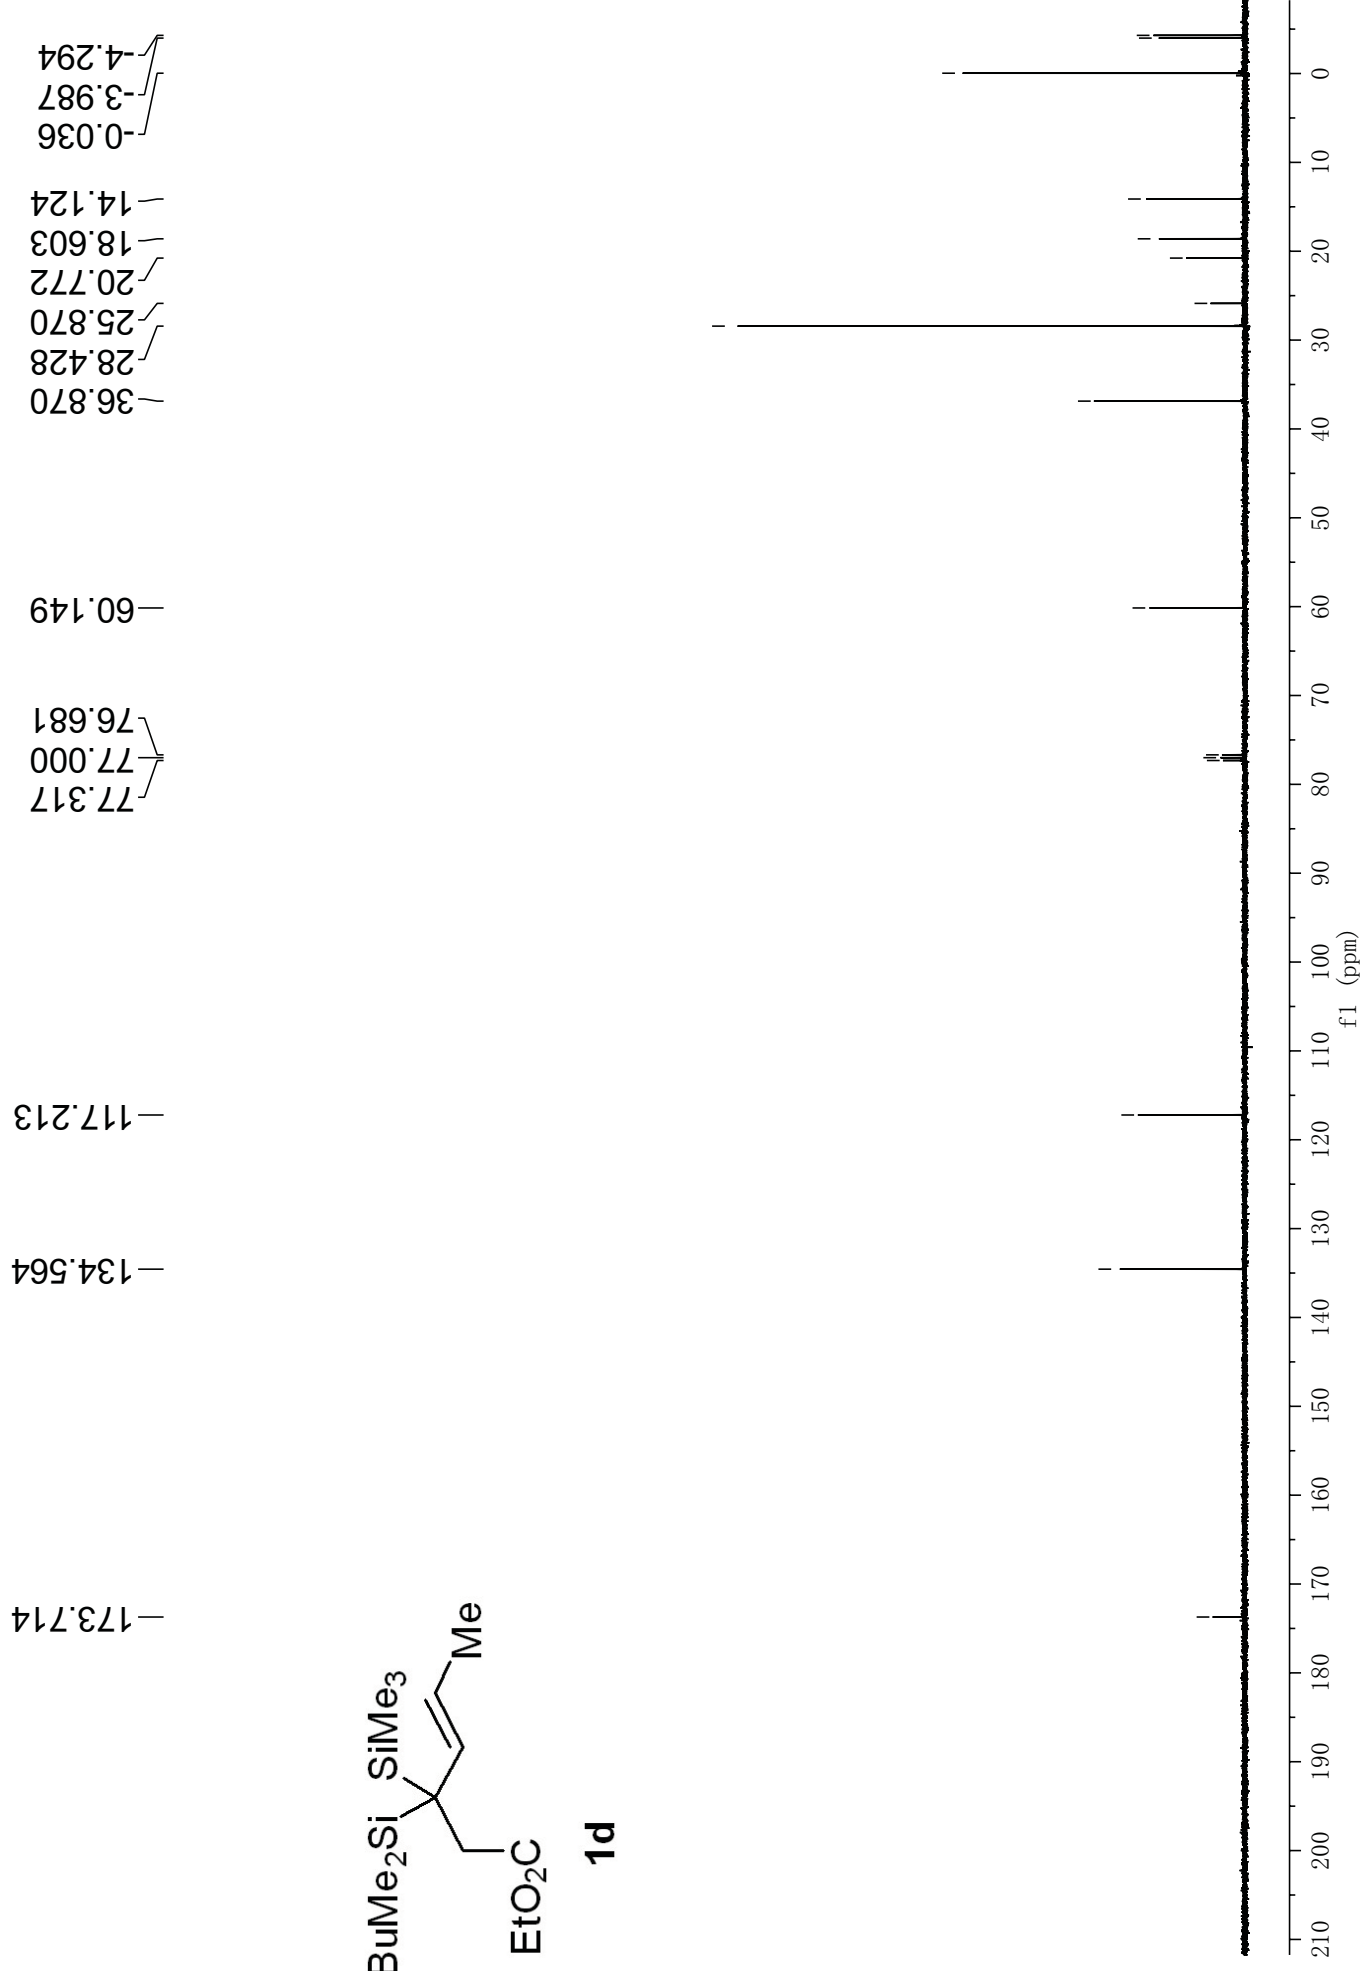

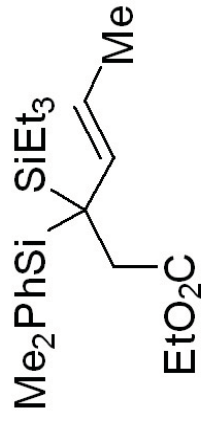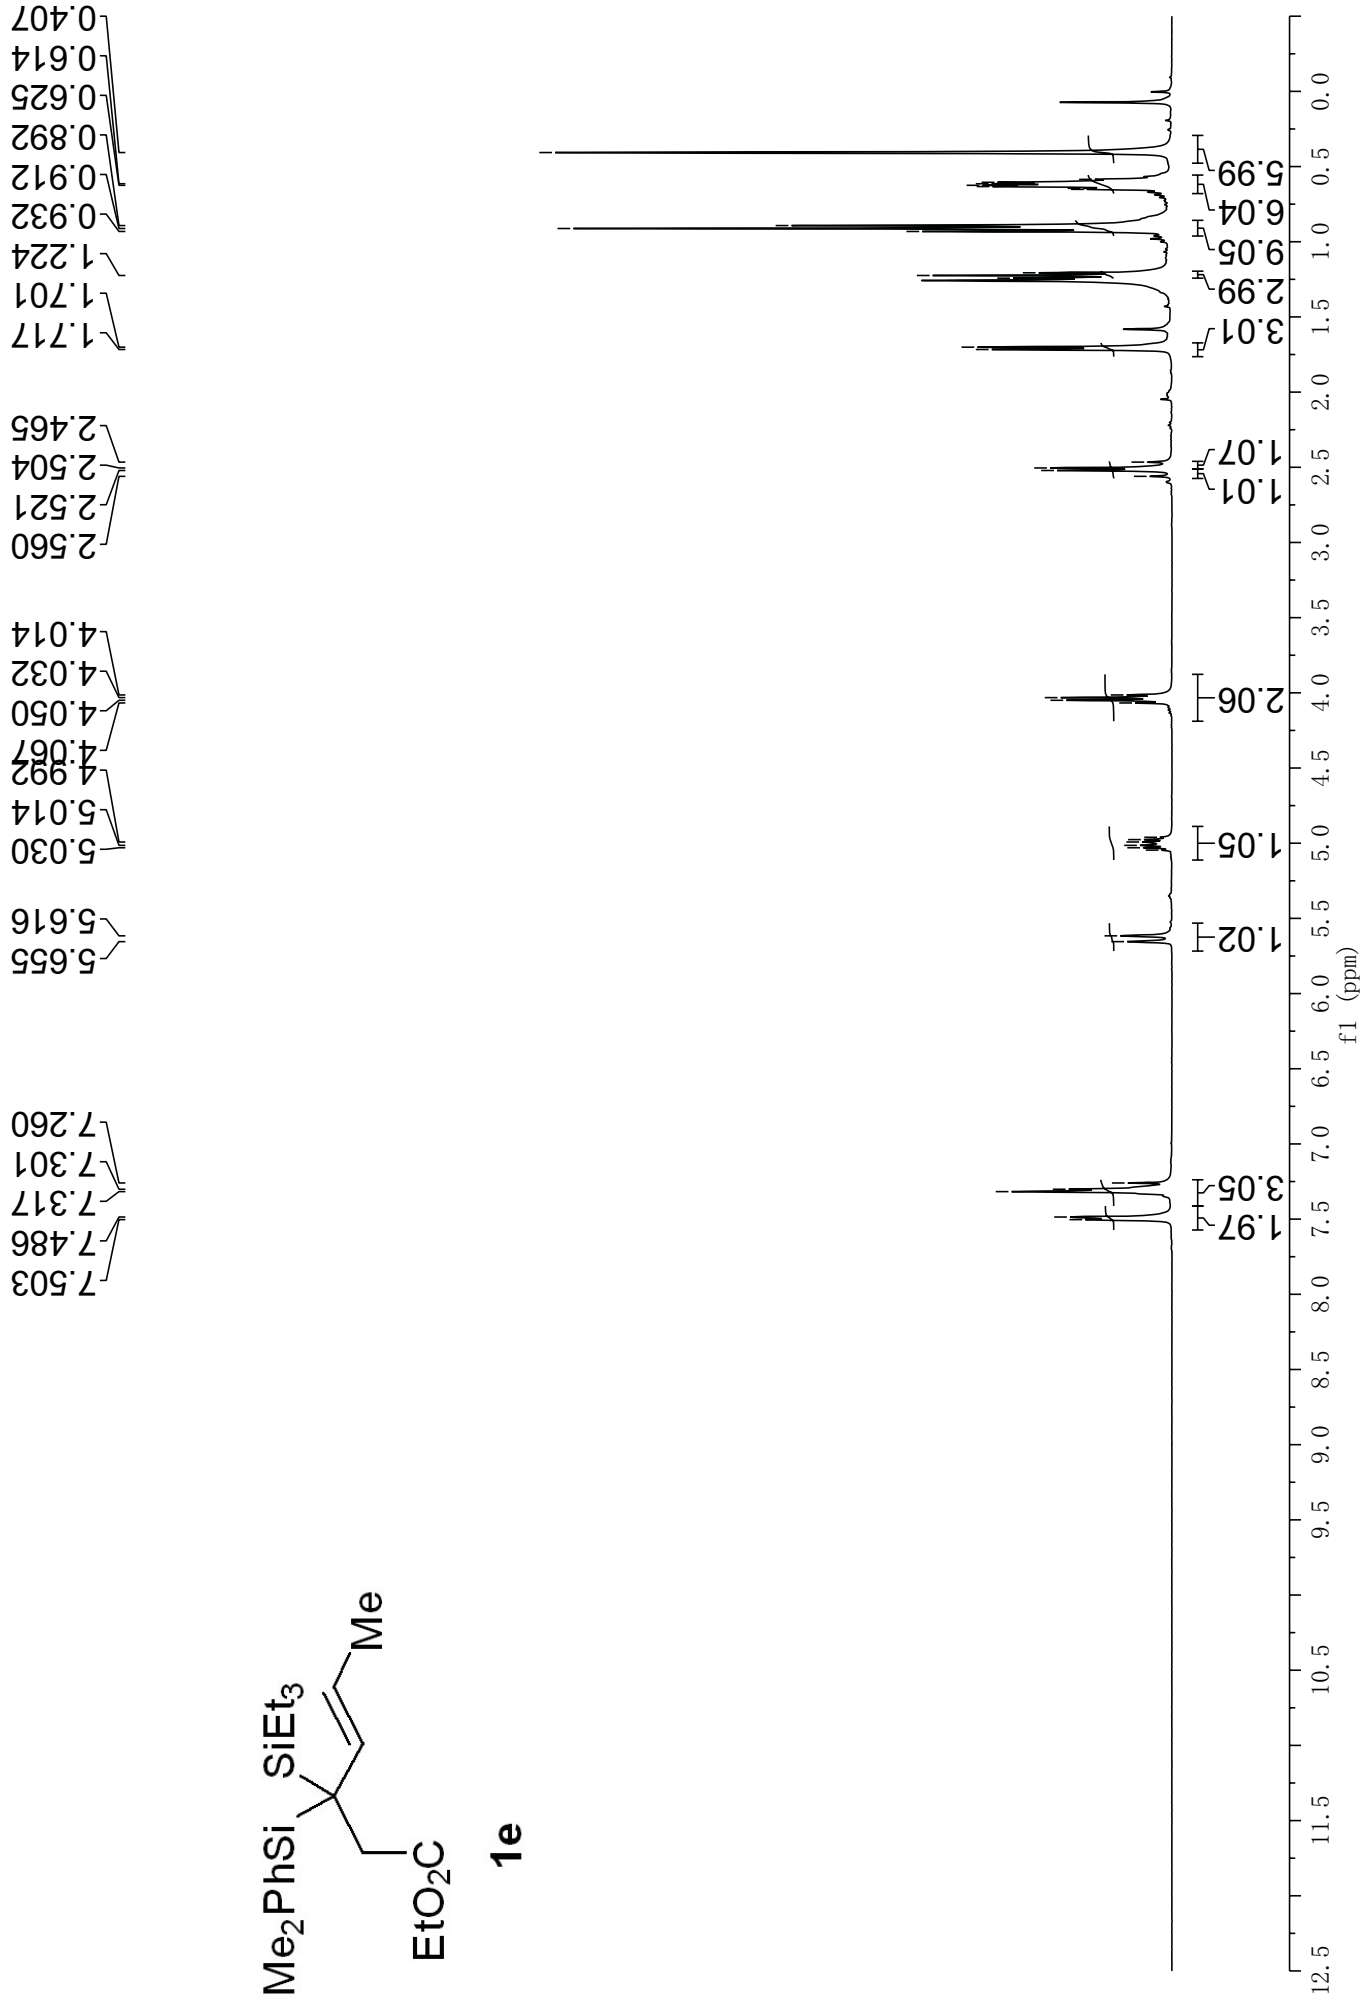

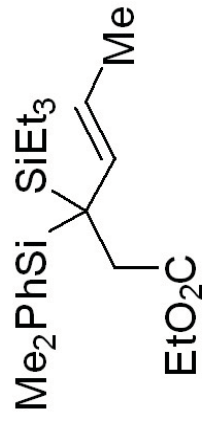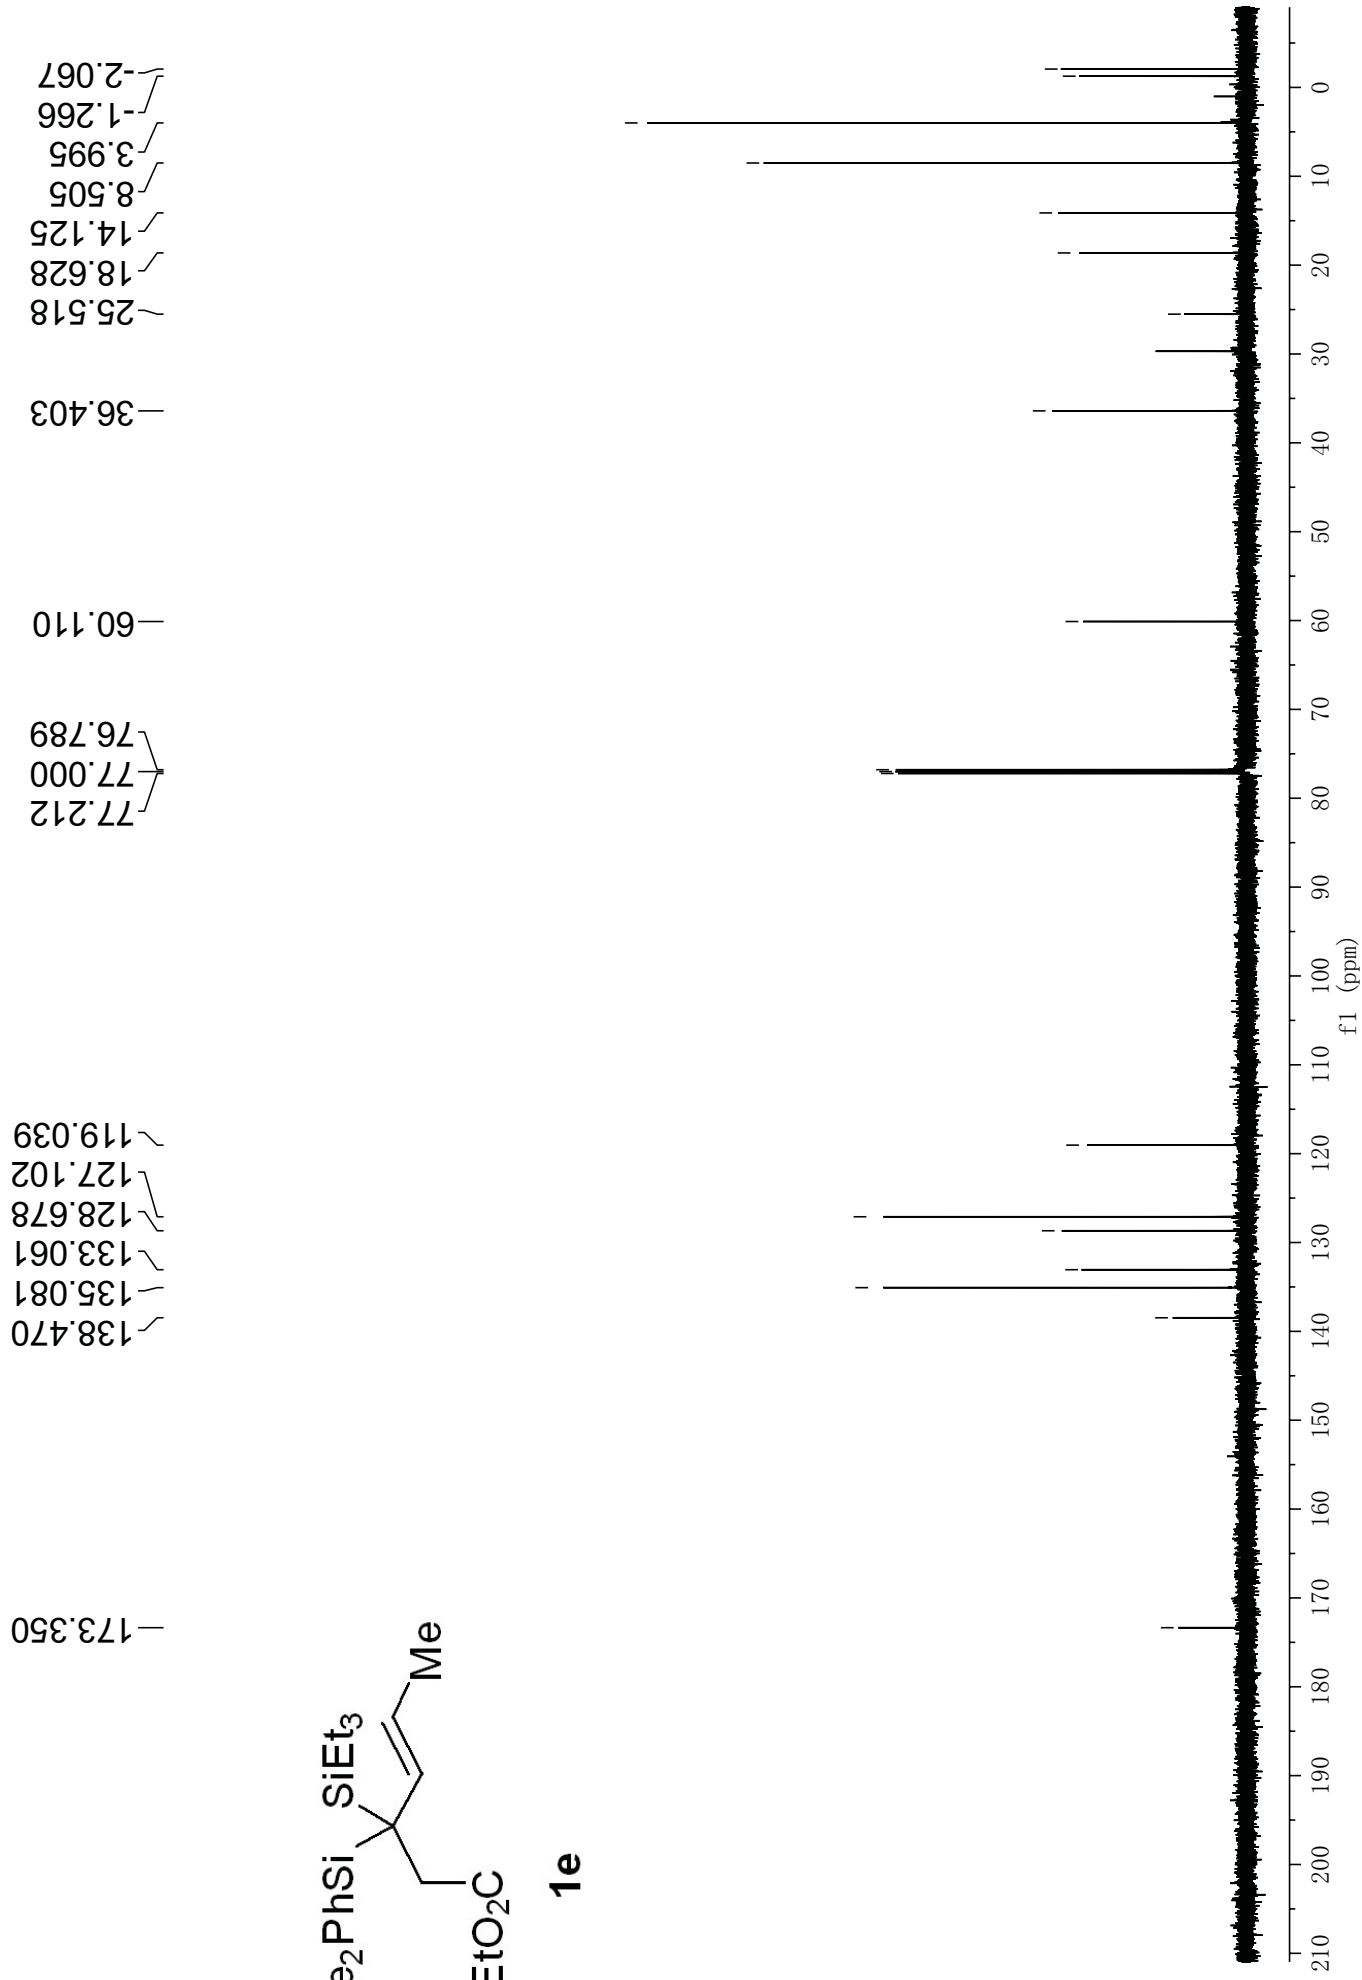



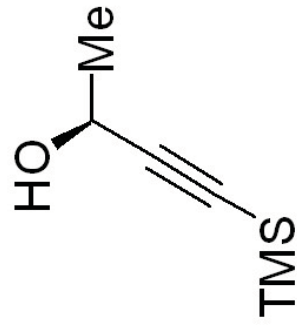

(S)-4

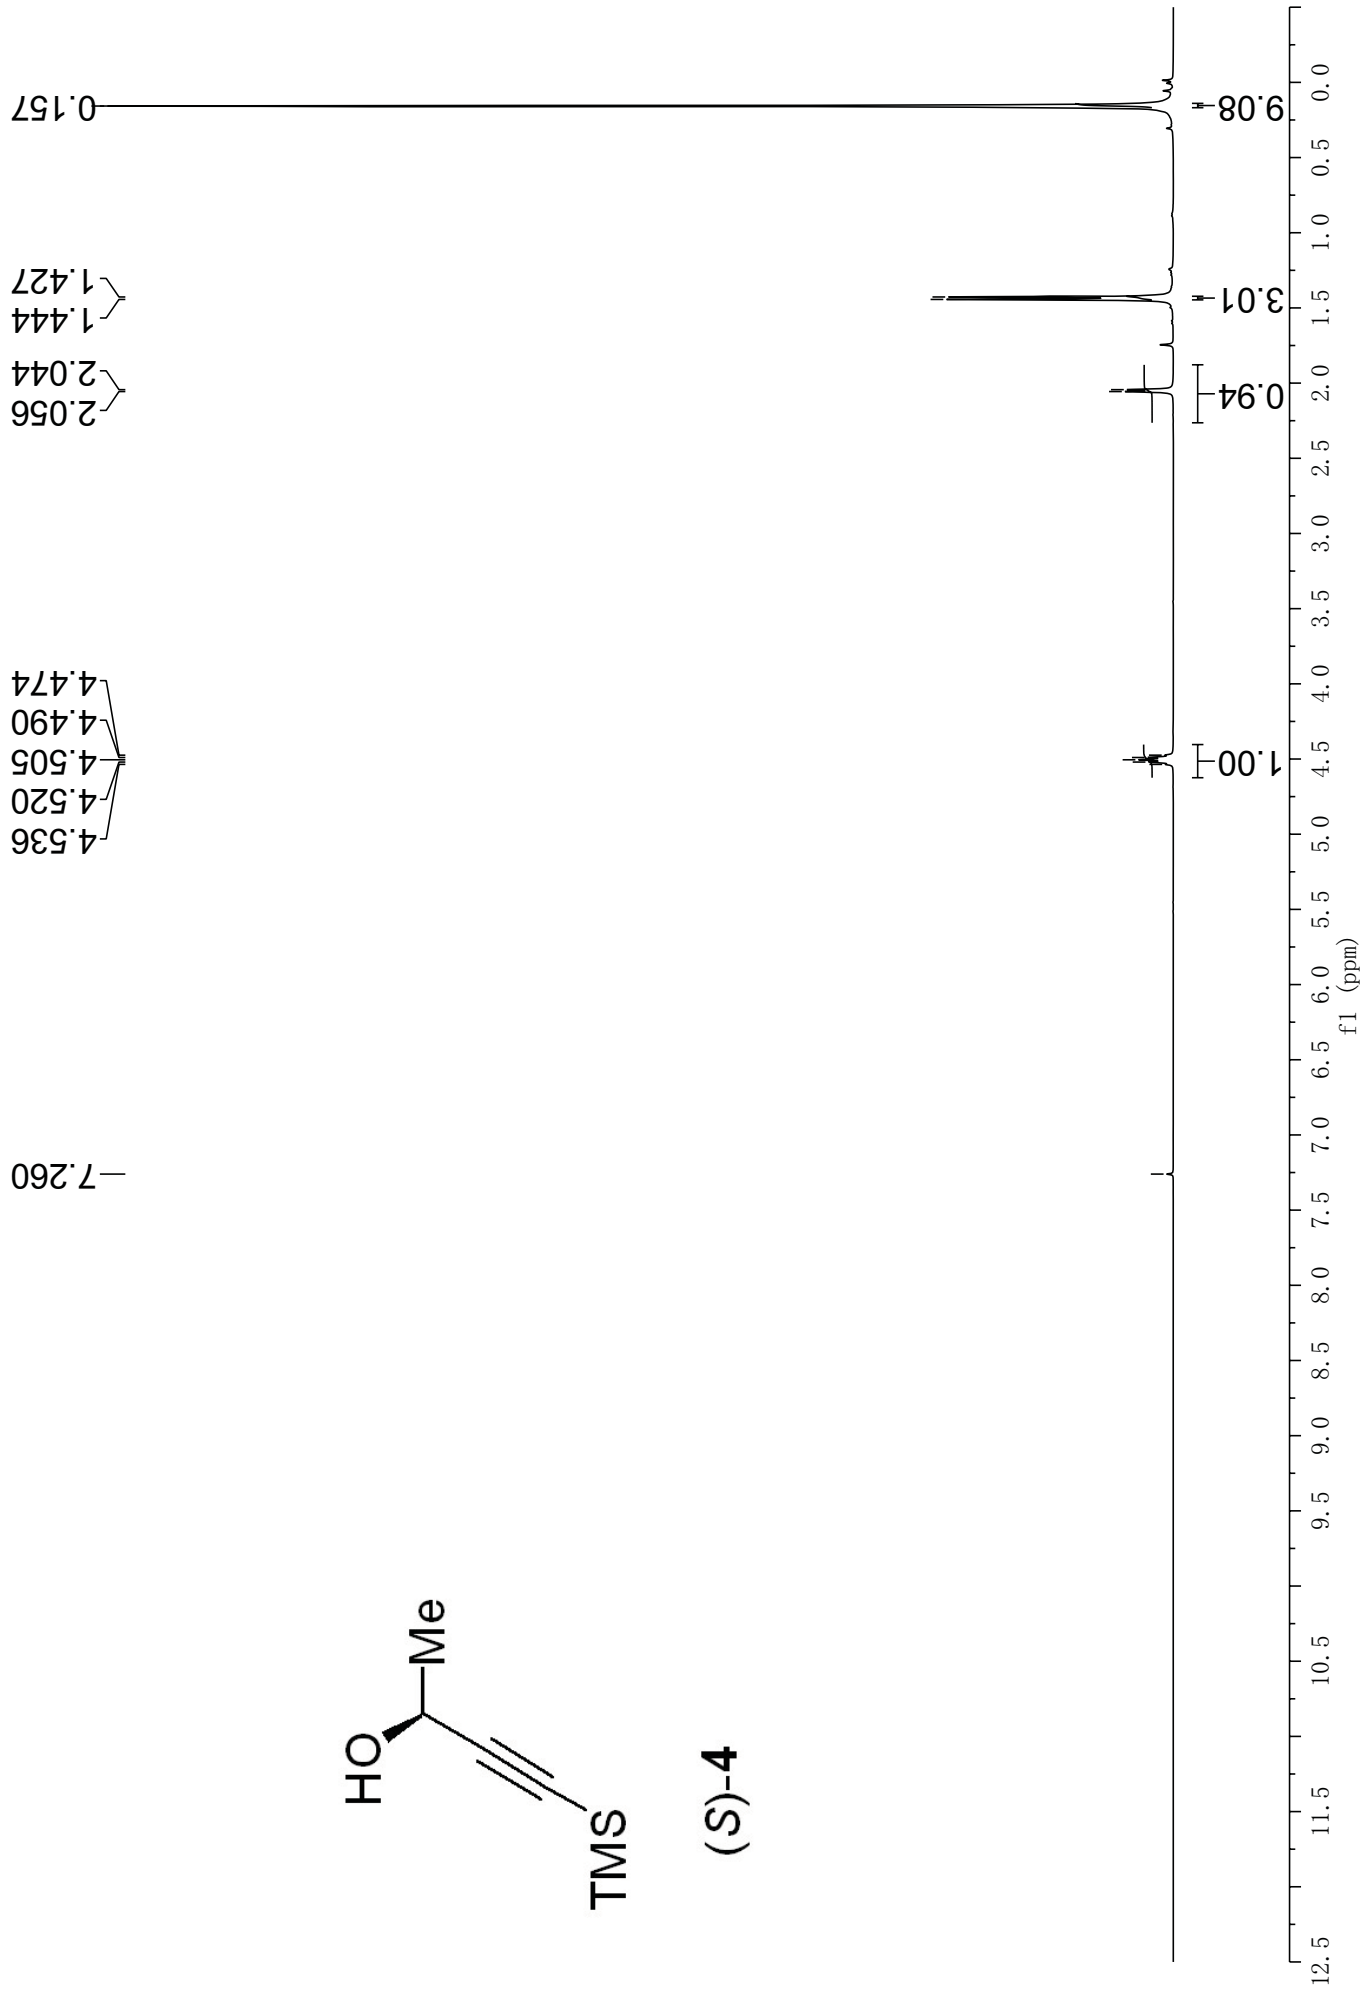

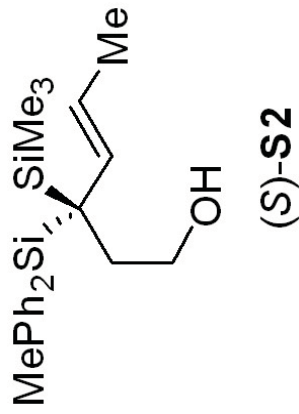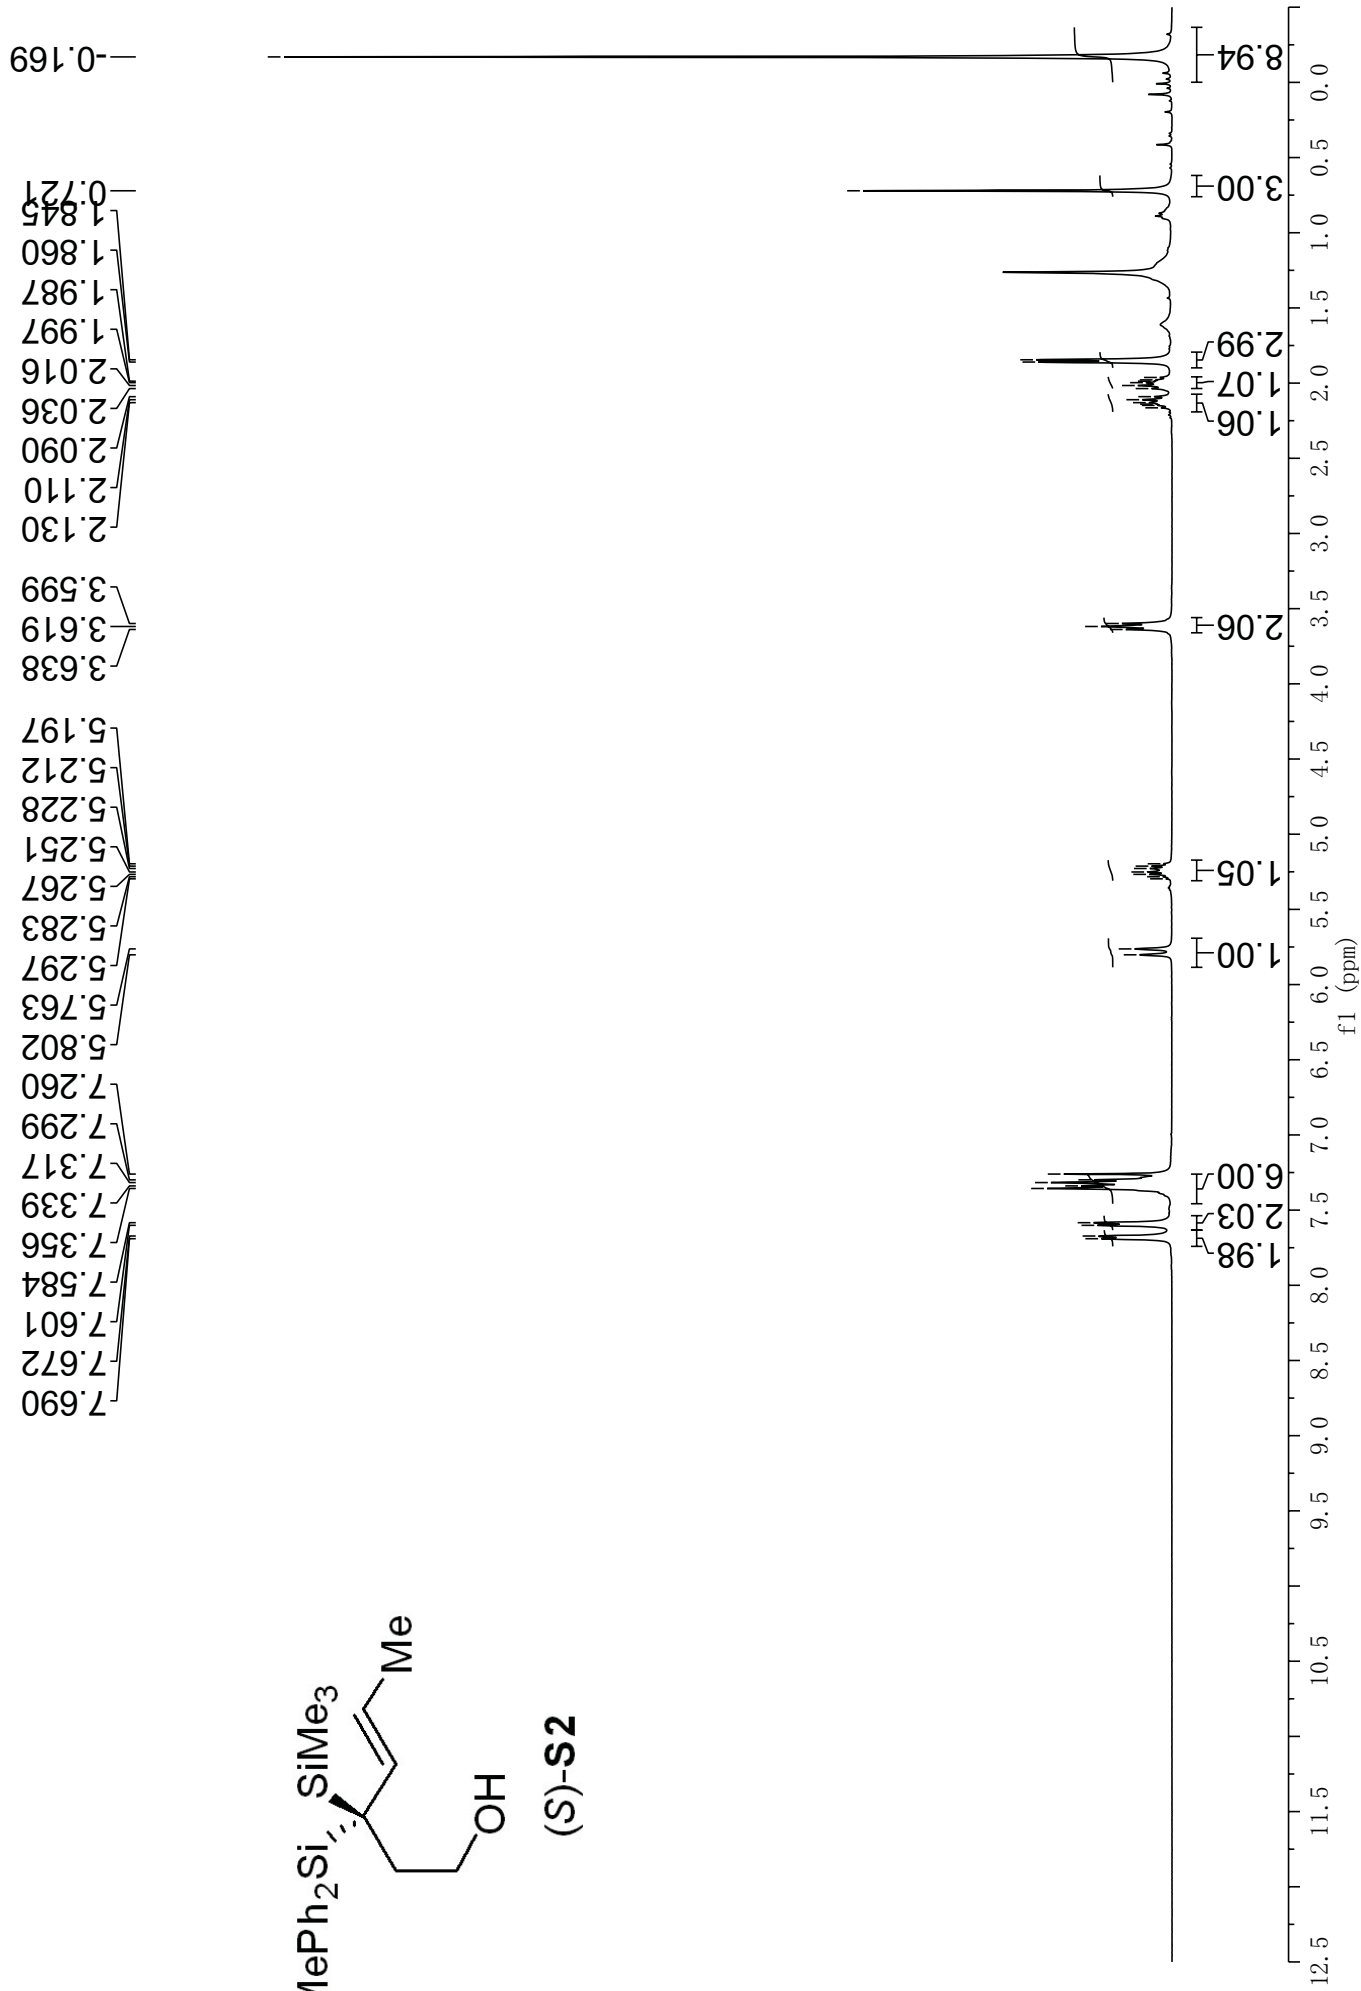

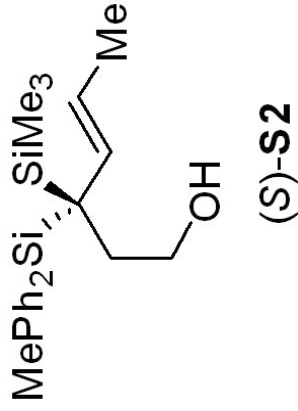

137.391  
136.997  
135.435  
135.415  
131.570  
129.057  
128.933  
127.583  
127.478  
120.618

77.211  
77.000  
76.788

60.683

34.058

24.388  
18.704

0.940  
-3.110

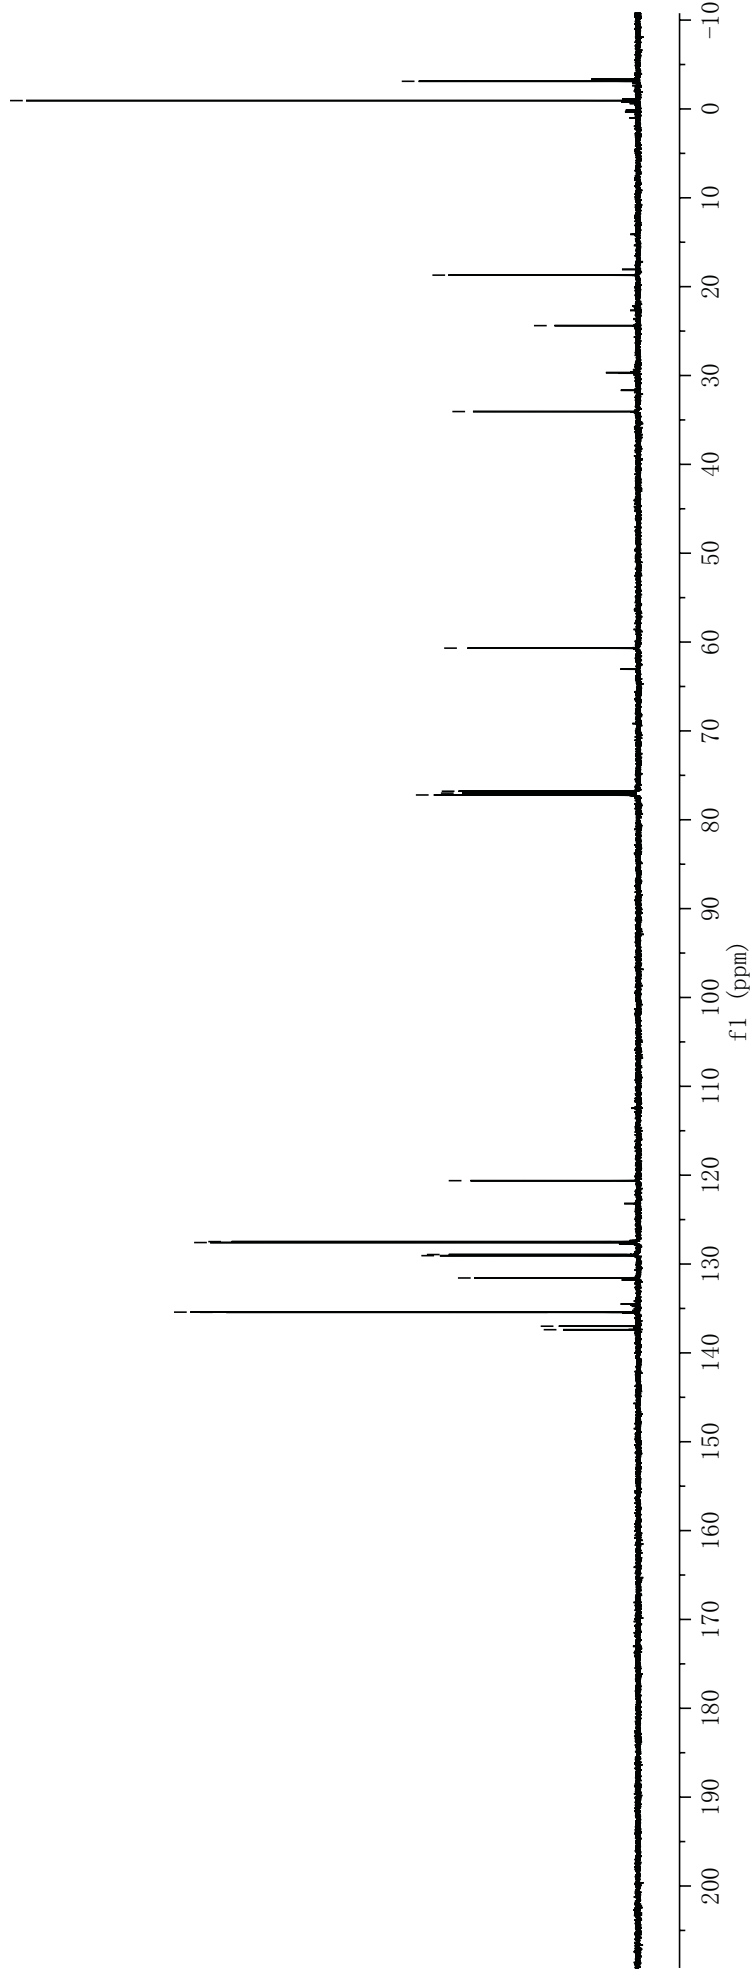

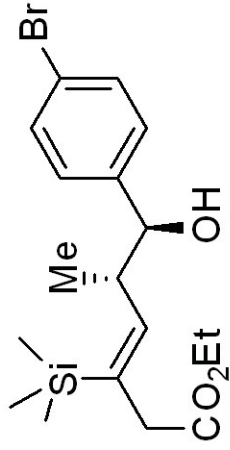

2a

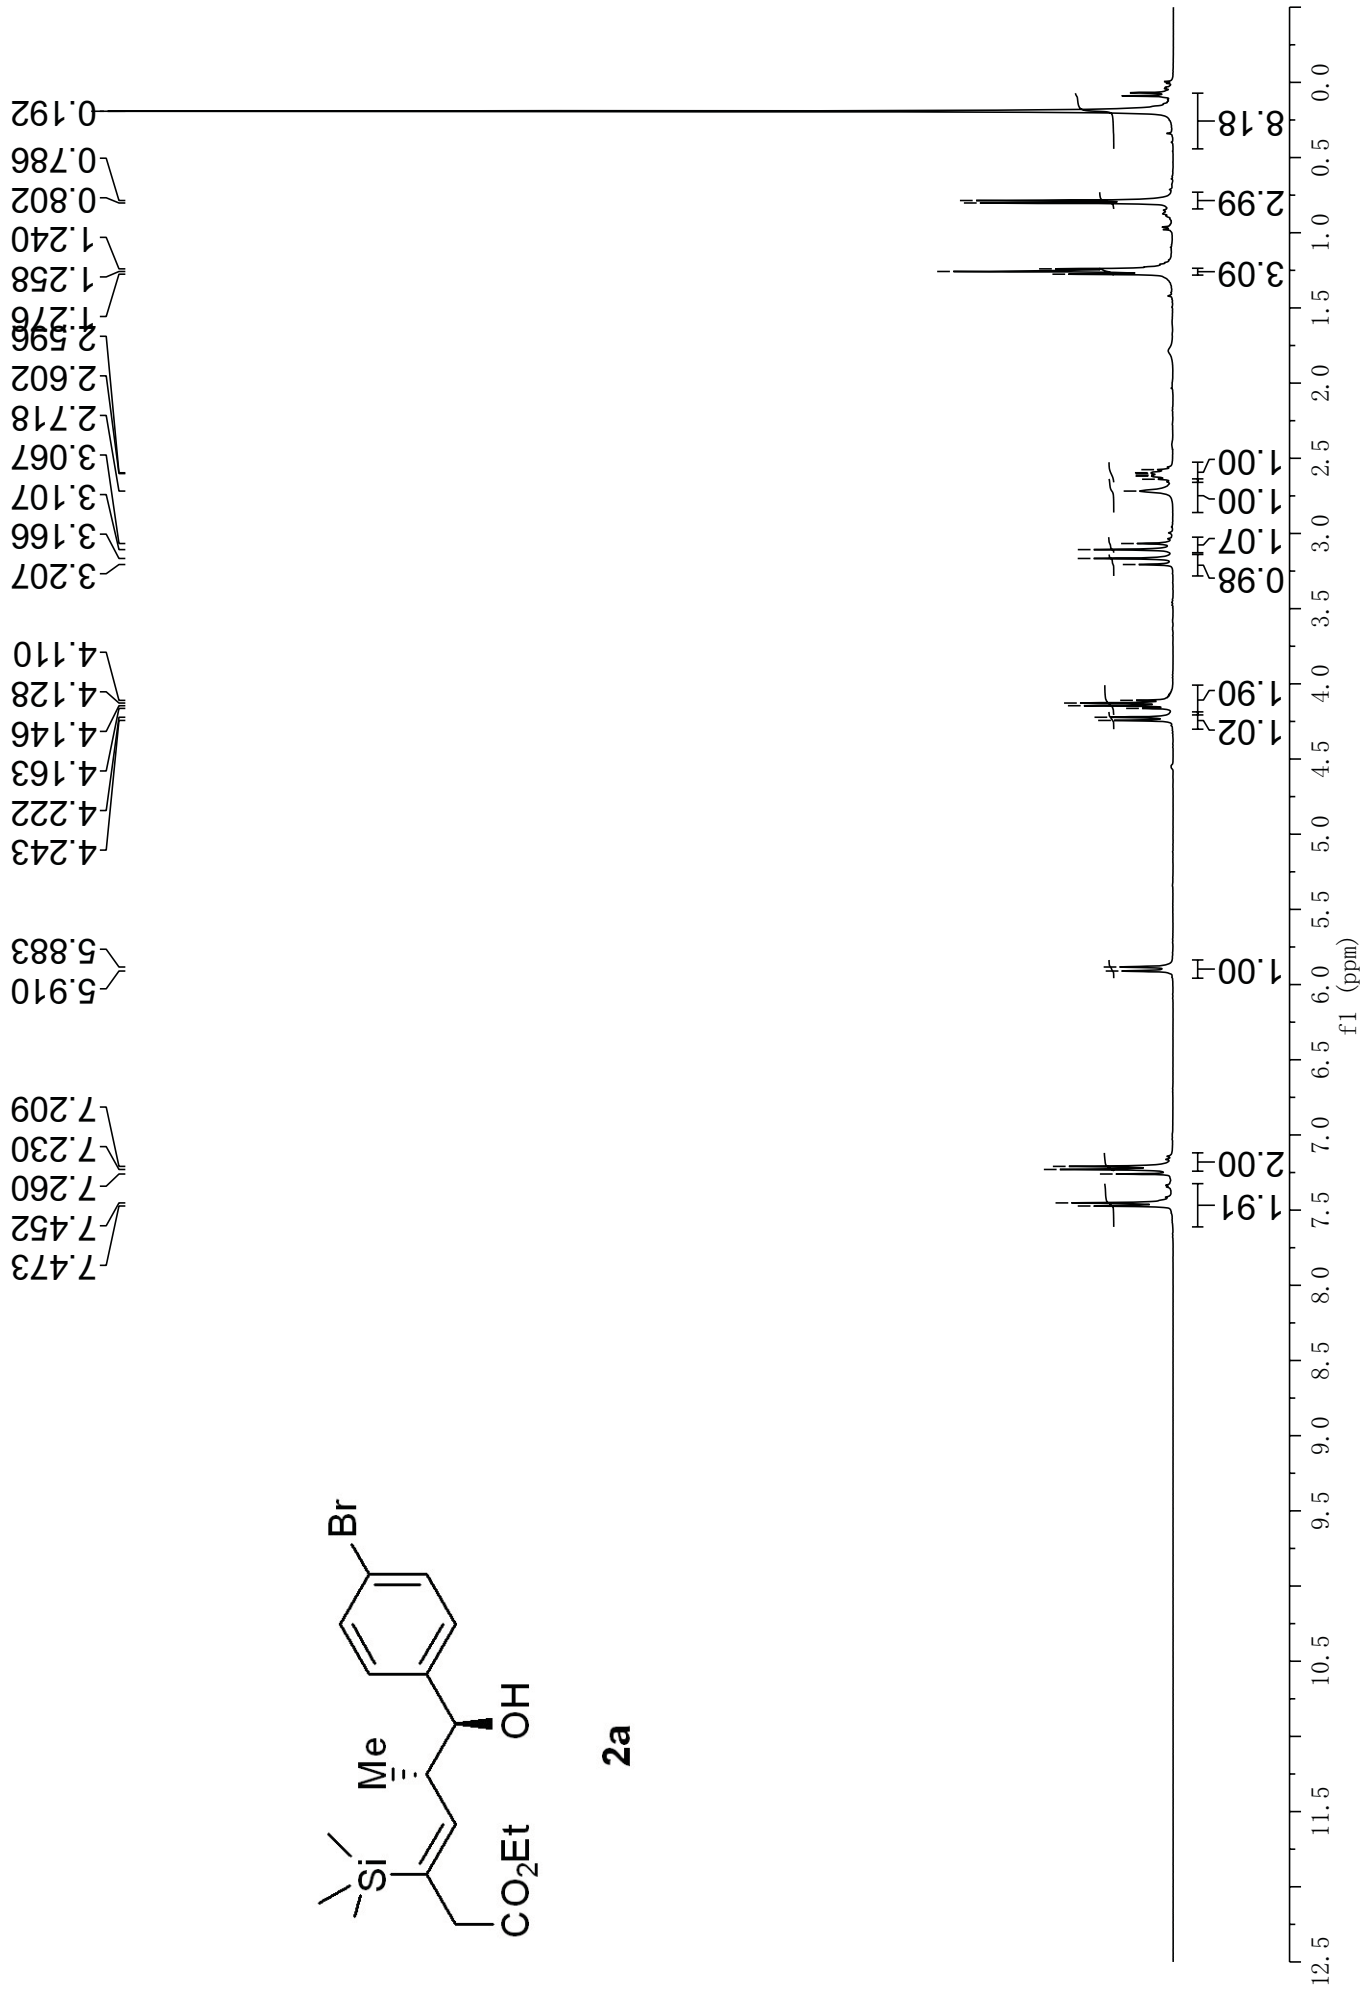

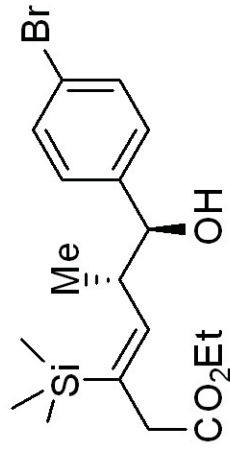

2a

|         |         |         |         |         |         |         |
|---------|---------|---------|---------|---------|---------|---------|
| 172.792 | 148.693 | 141.032 | 136.417 | 131.149 | 128.787 | 121.280 |
| 77.686  | 77.649  | 77.321  | 77.000  | 76.683  | 60.673  | 44.916  |
| 43.518  | 16.575  | 14.115  | 0.180   | 0.159   |         |         |

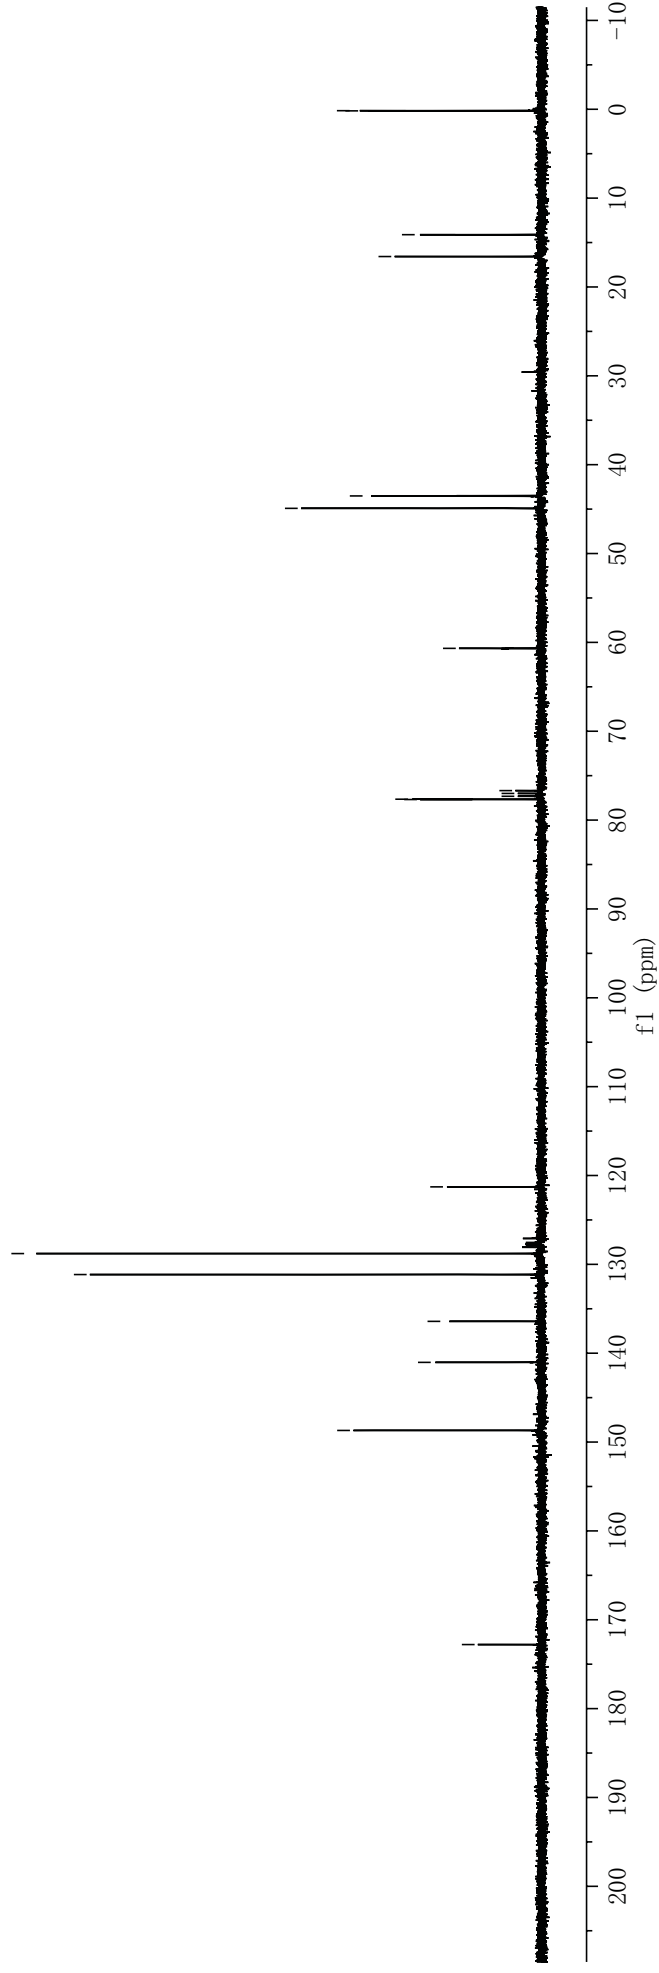

CHU-8-33FPBa H1 CDCI3 400MHZ

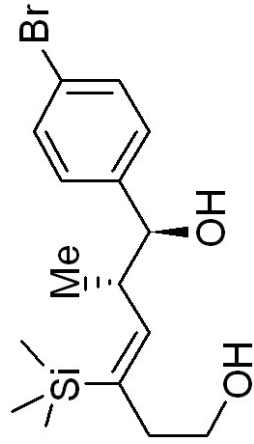

S3

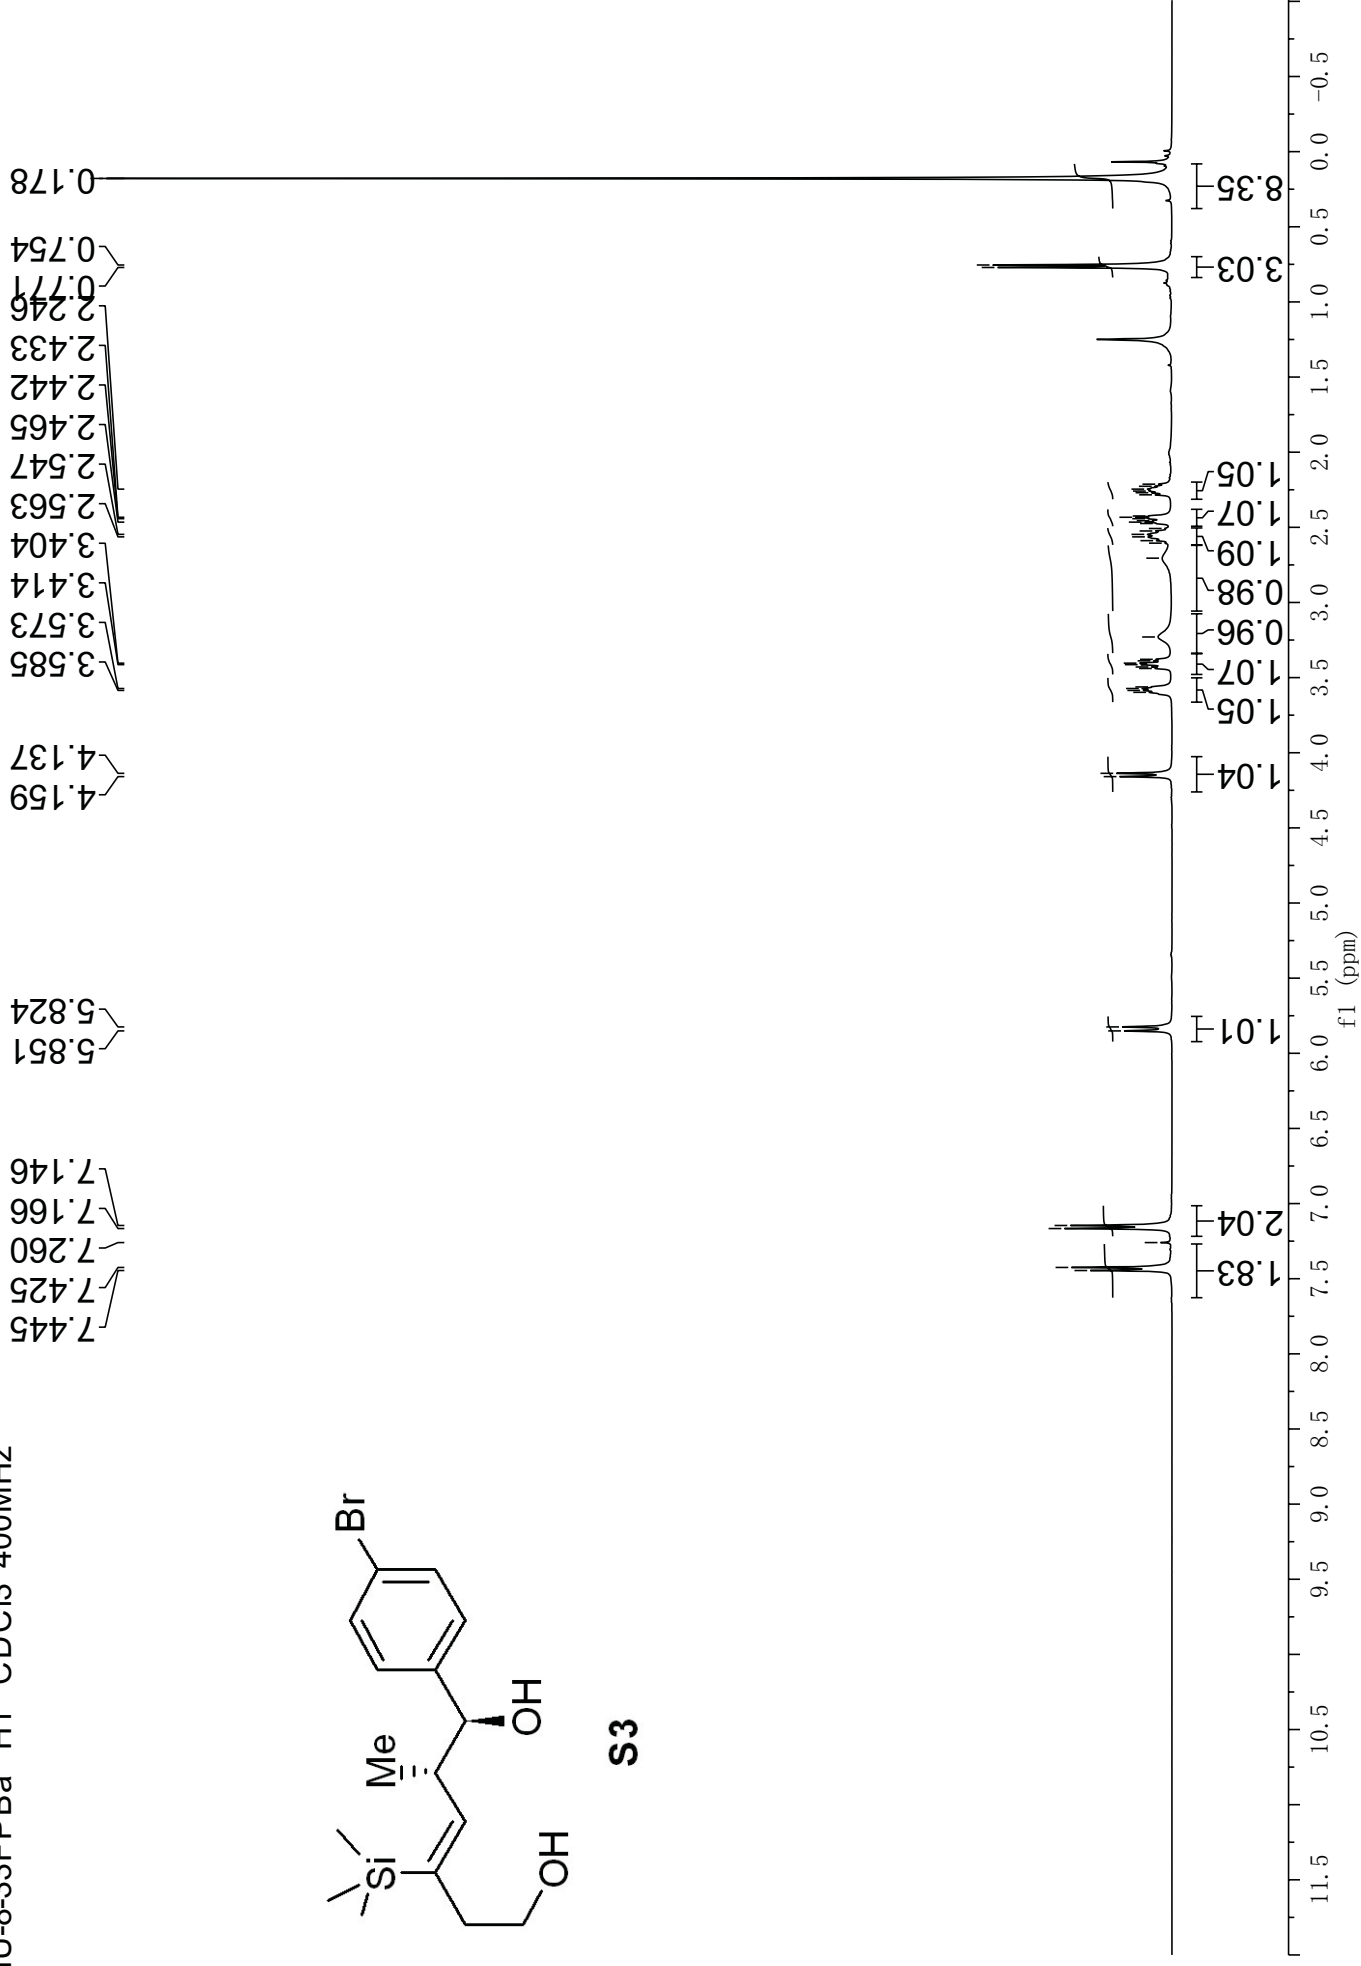

CHU-8-33FPBa C13 CDCI3 400MHZ

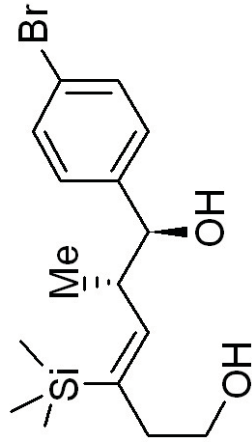

S3

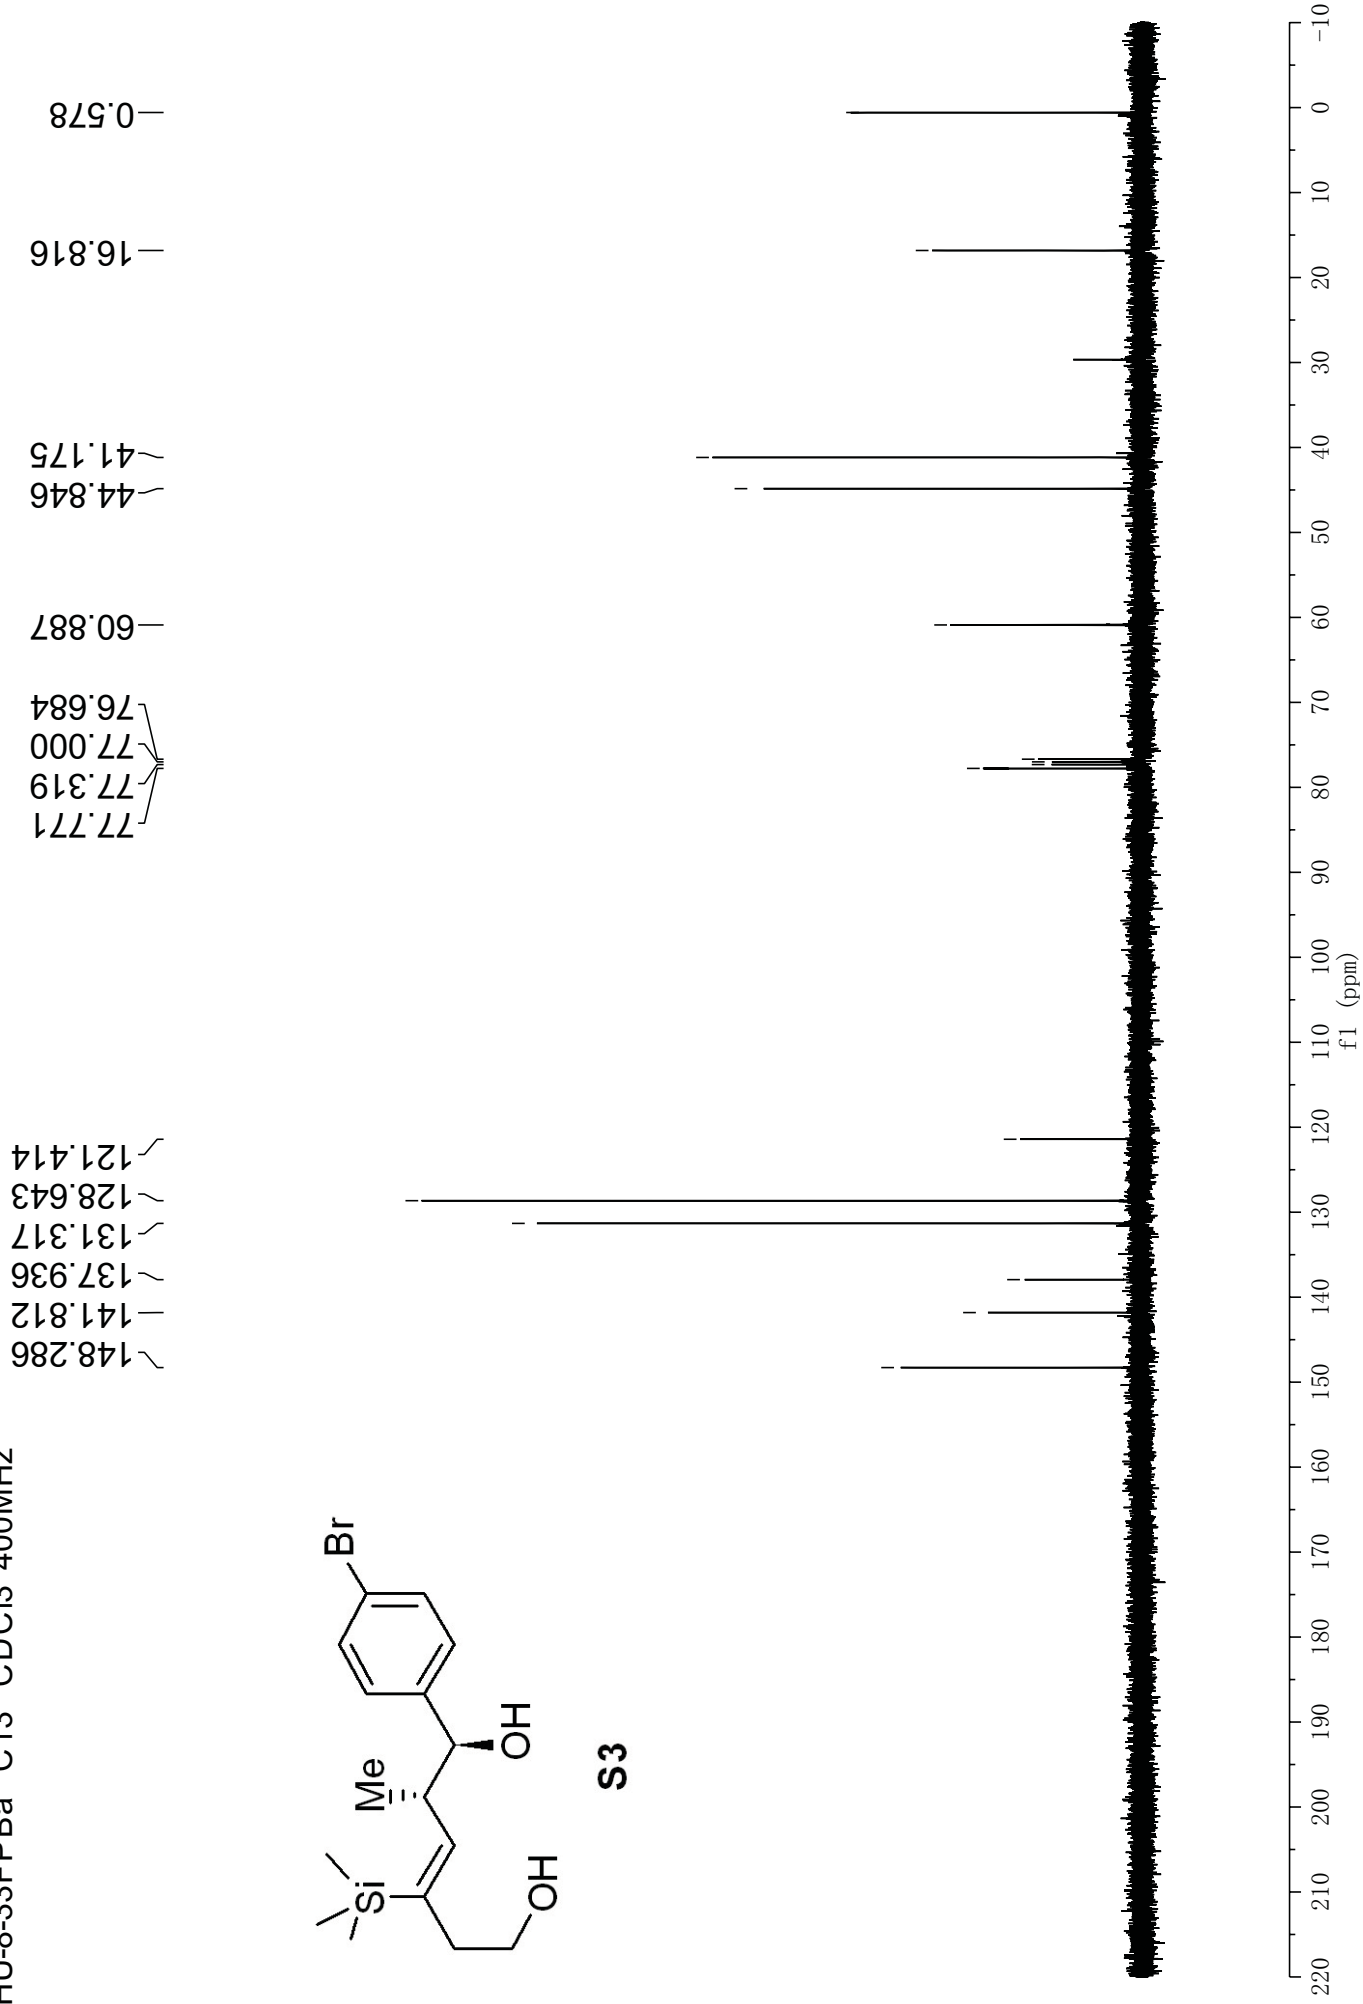

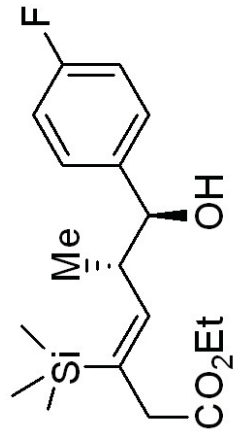

2b

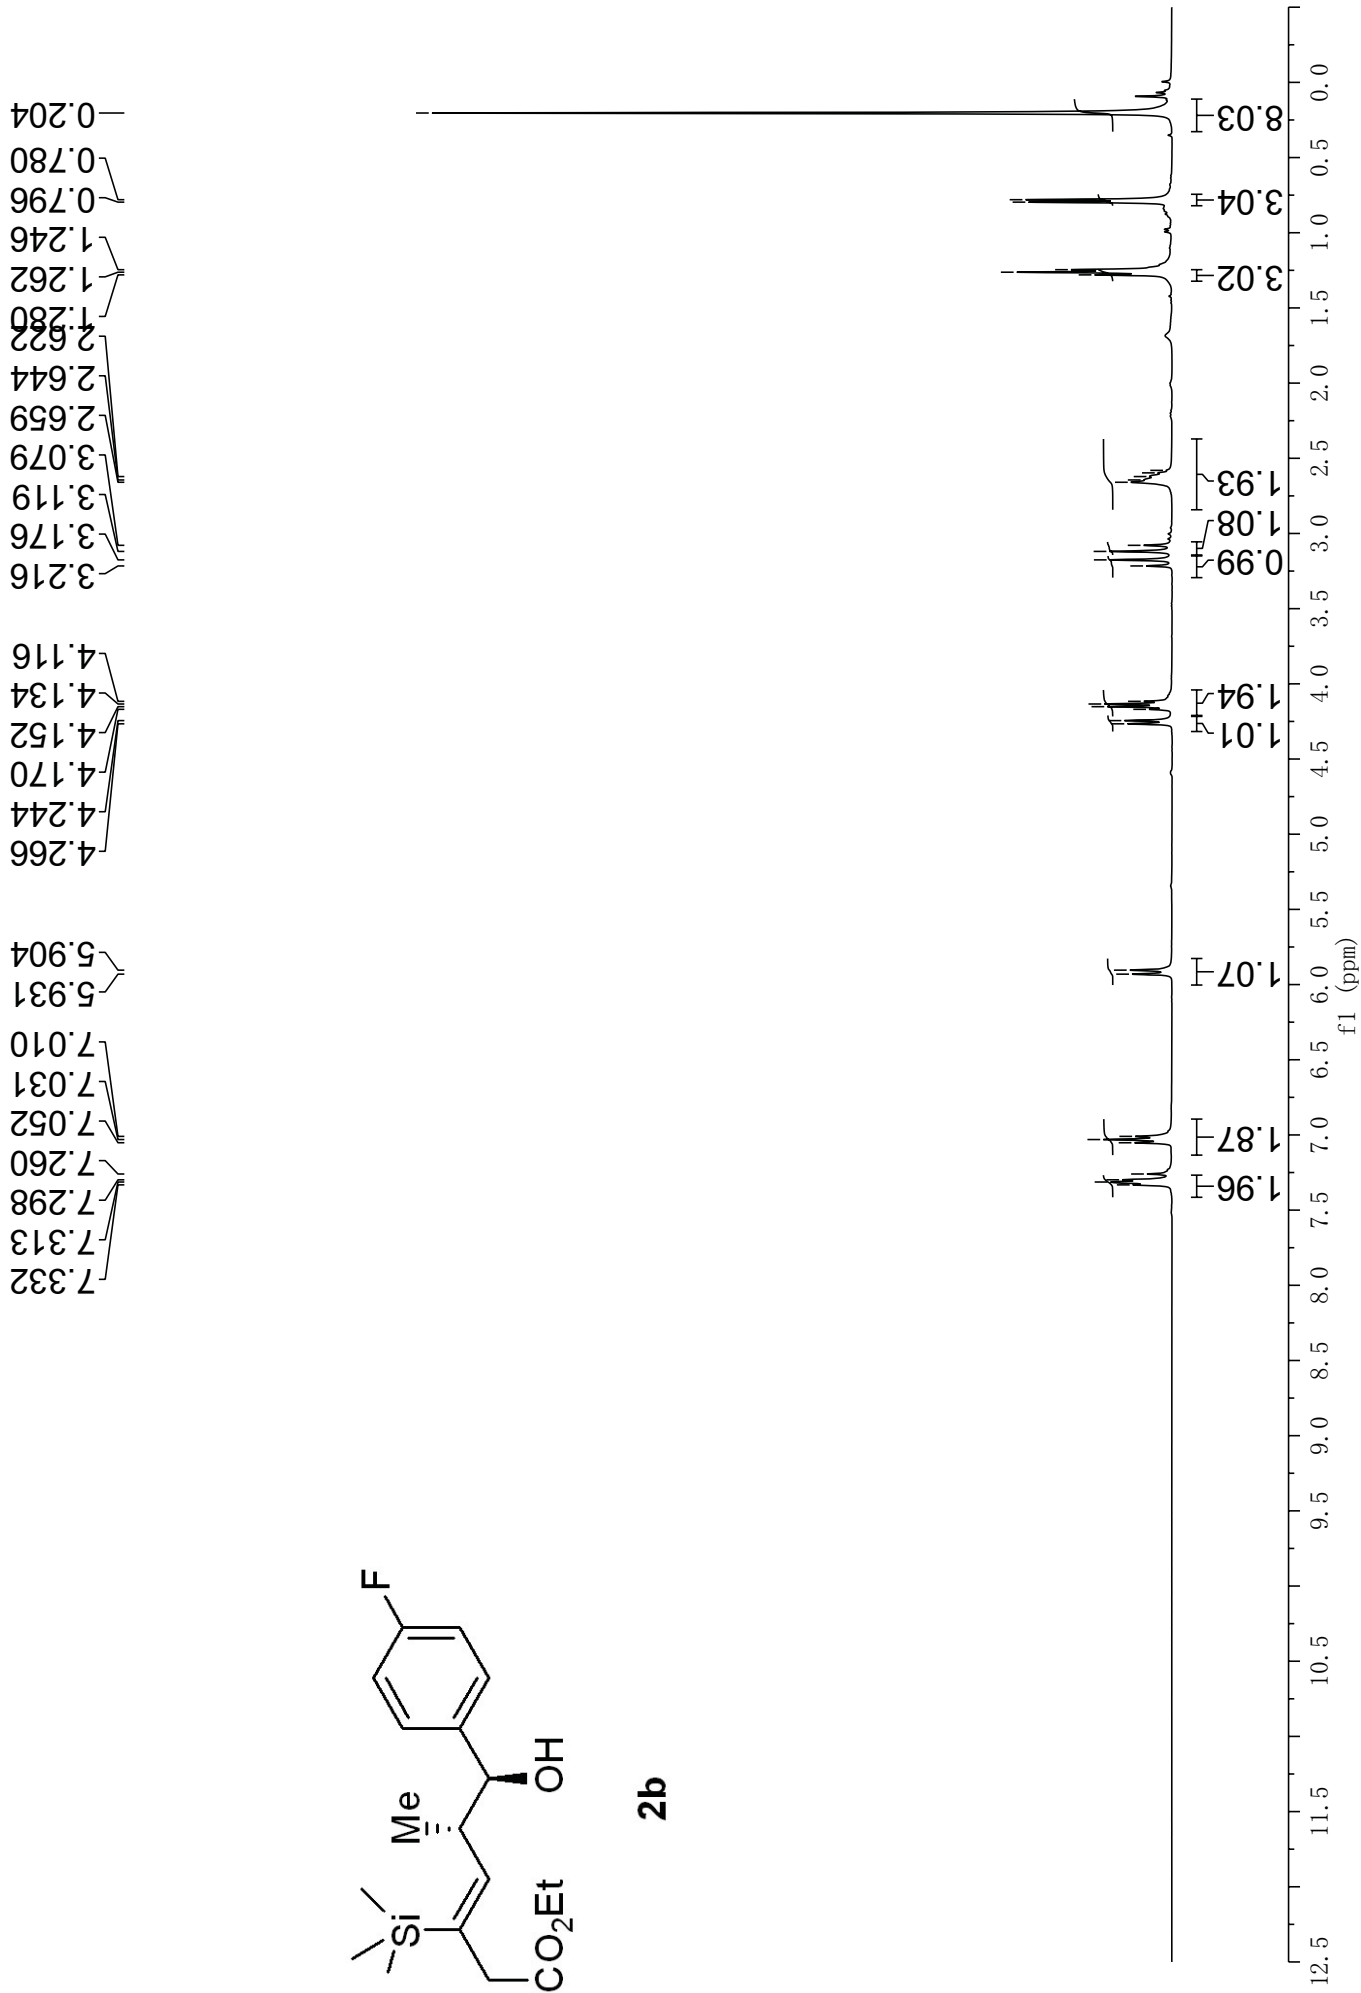



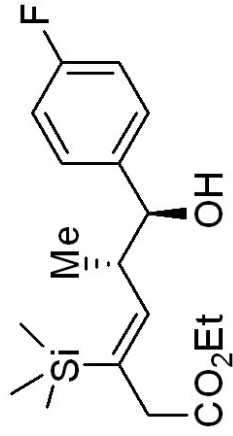

2b

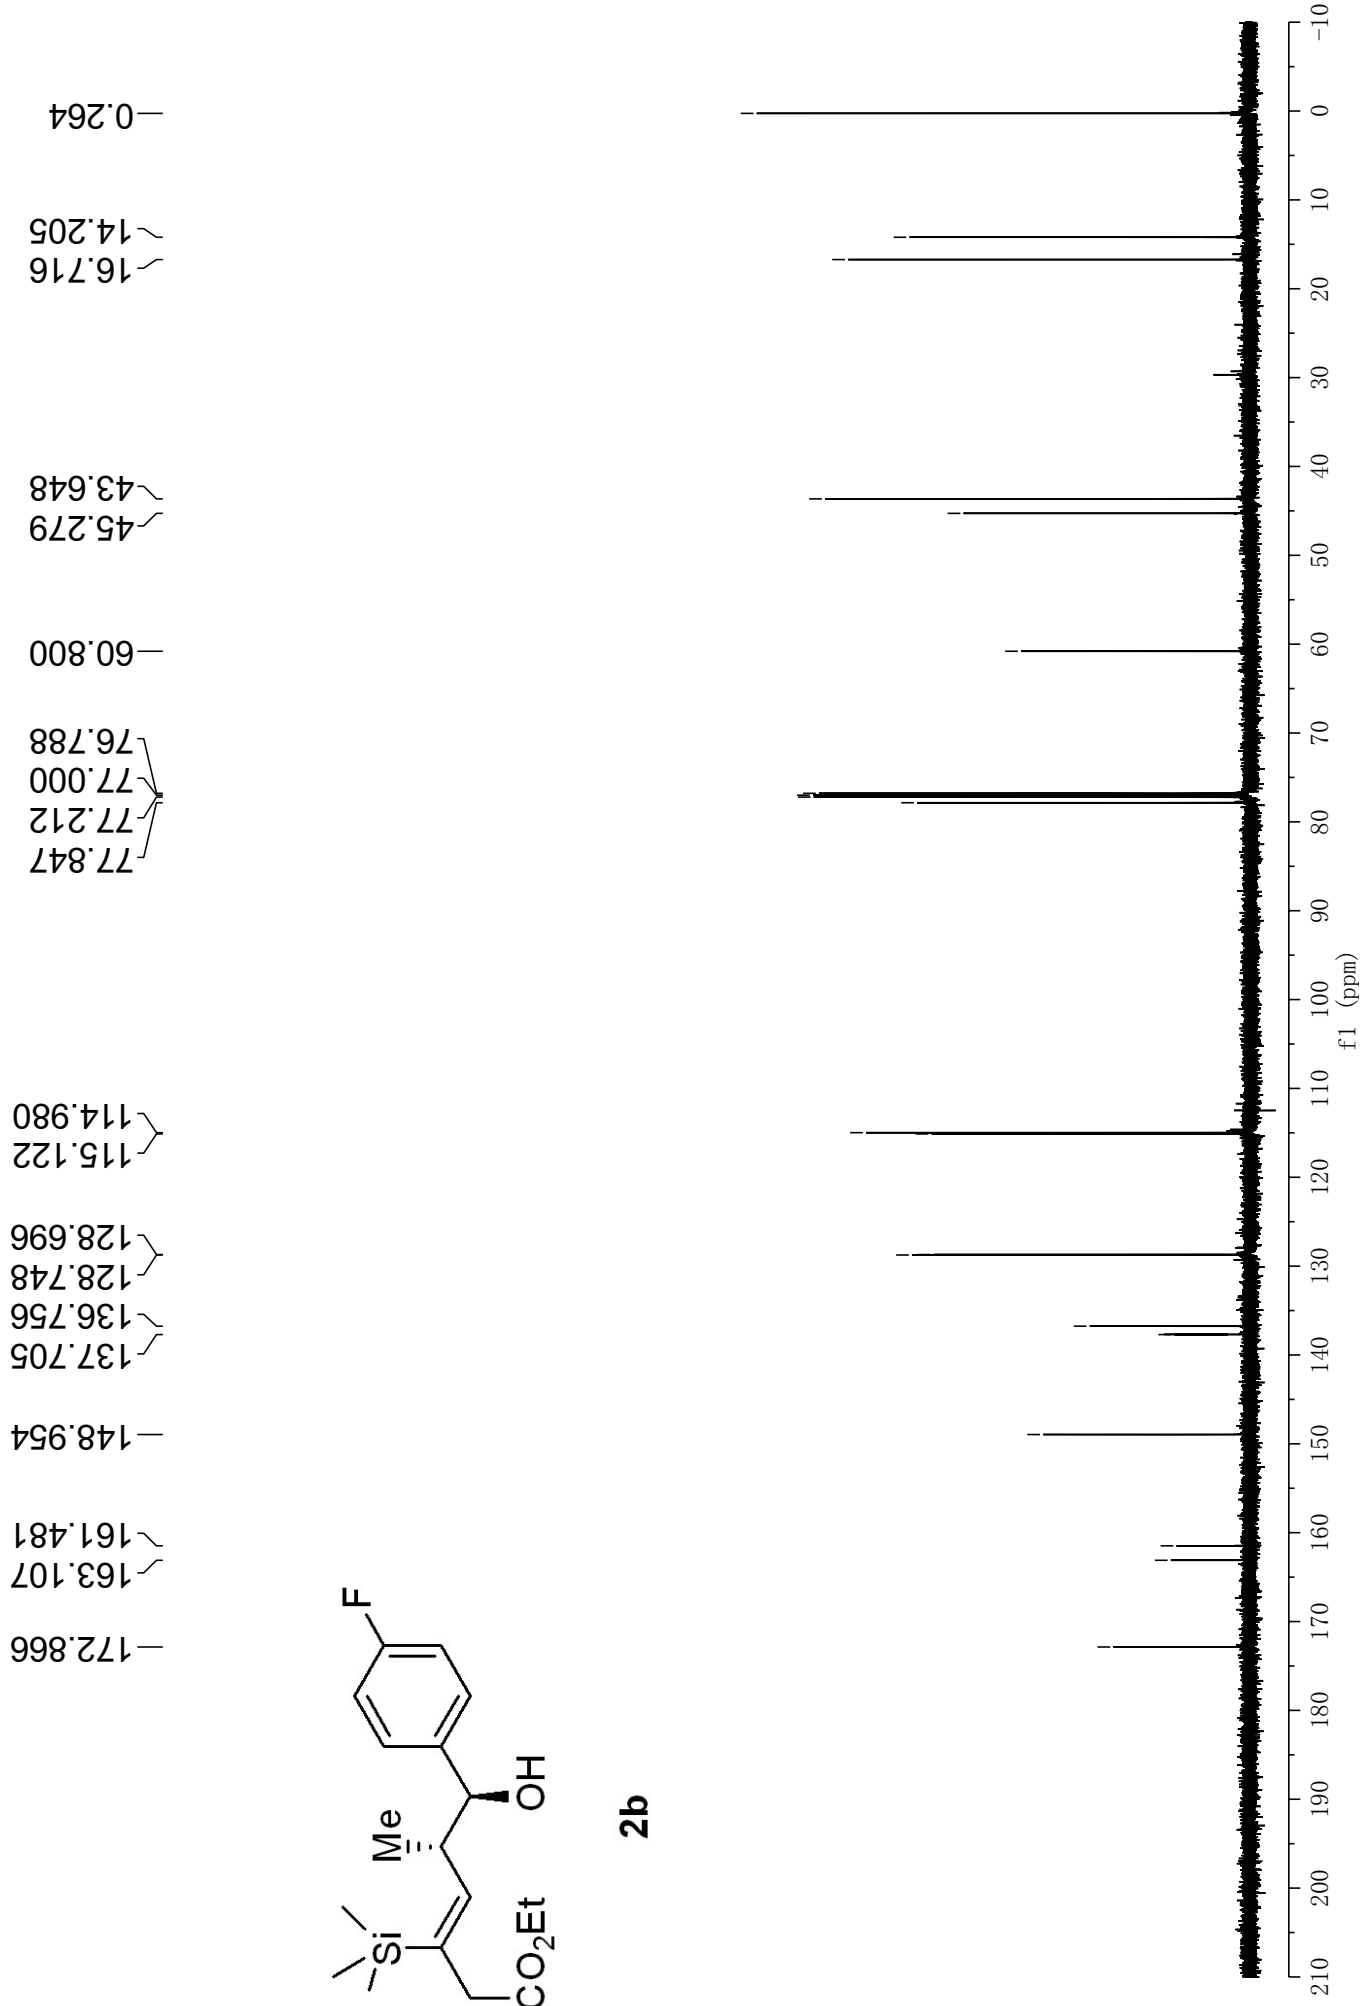

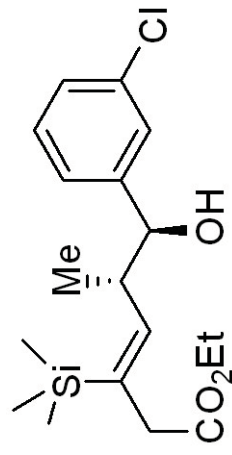

2c

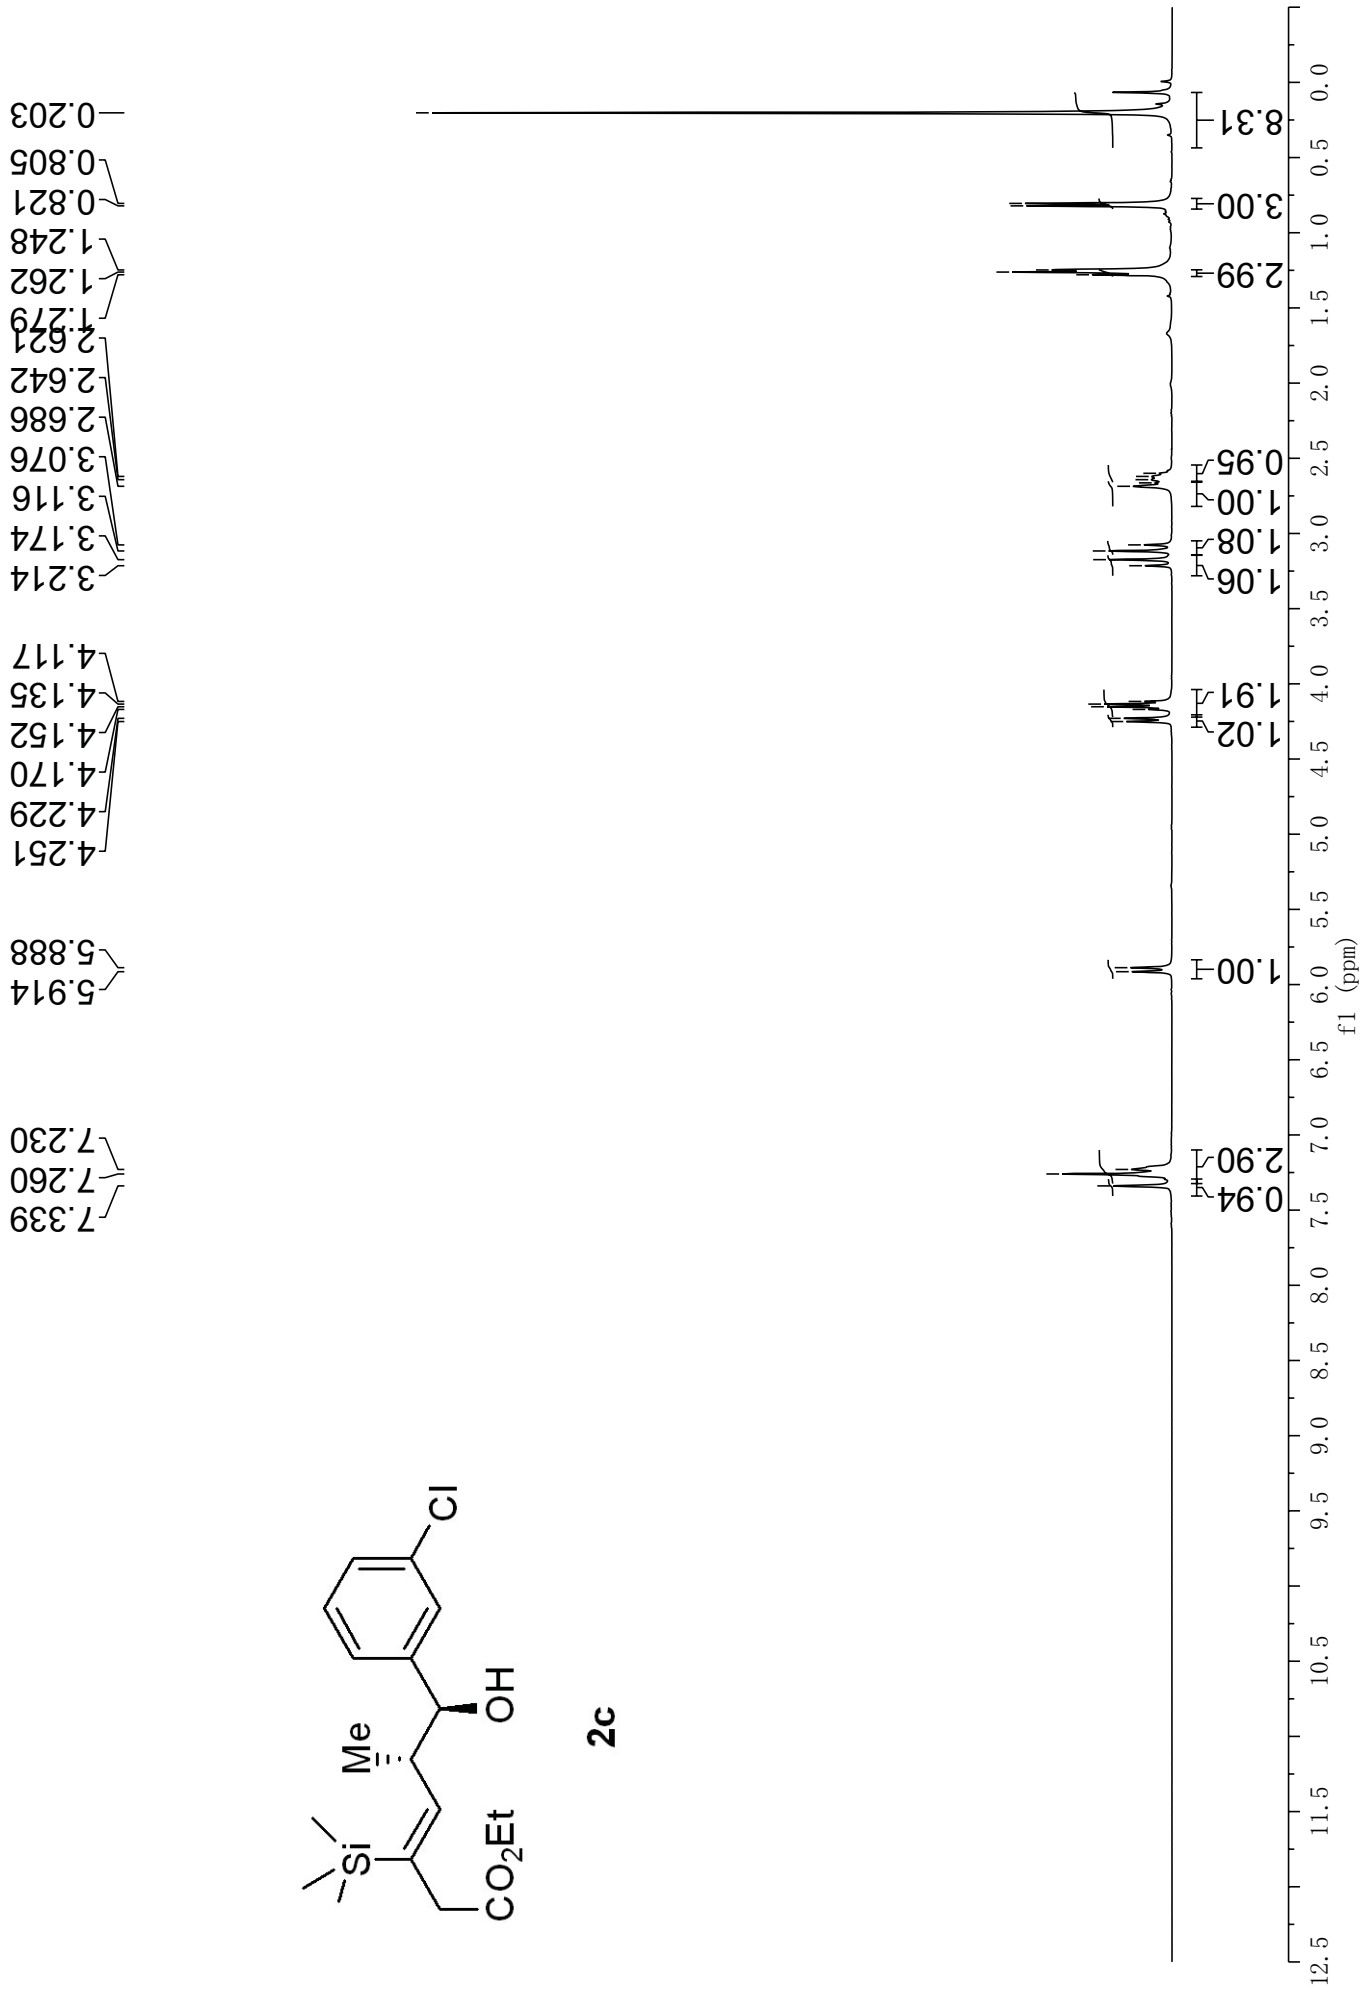

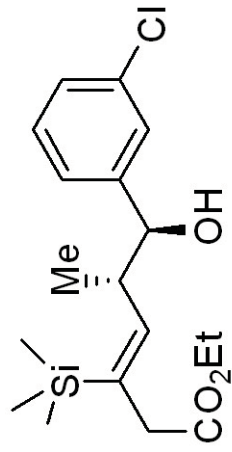

**2c**

172.853  
148.677  
144.046  
136.991  
134.100  
129.466  
127.833  
127.318  
125.404

77.931  
77.317  
77.000  
76.682

60.821

45.108  
43.633

16.693  
14.201

0.266  
0.247

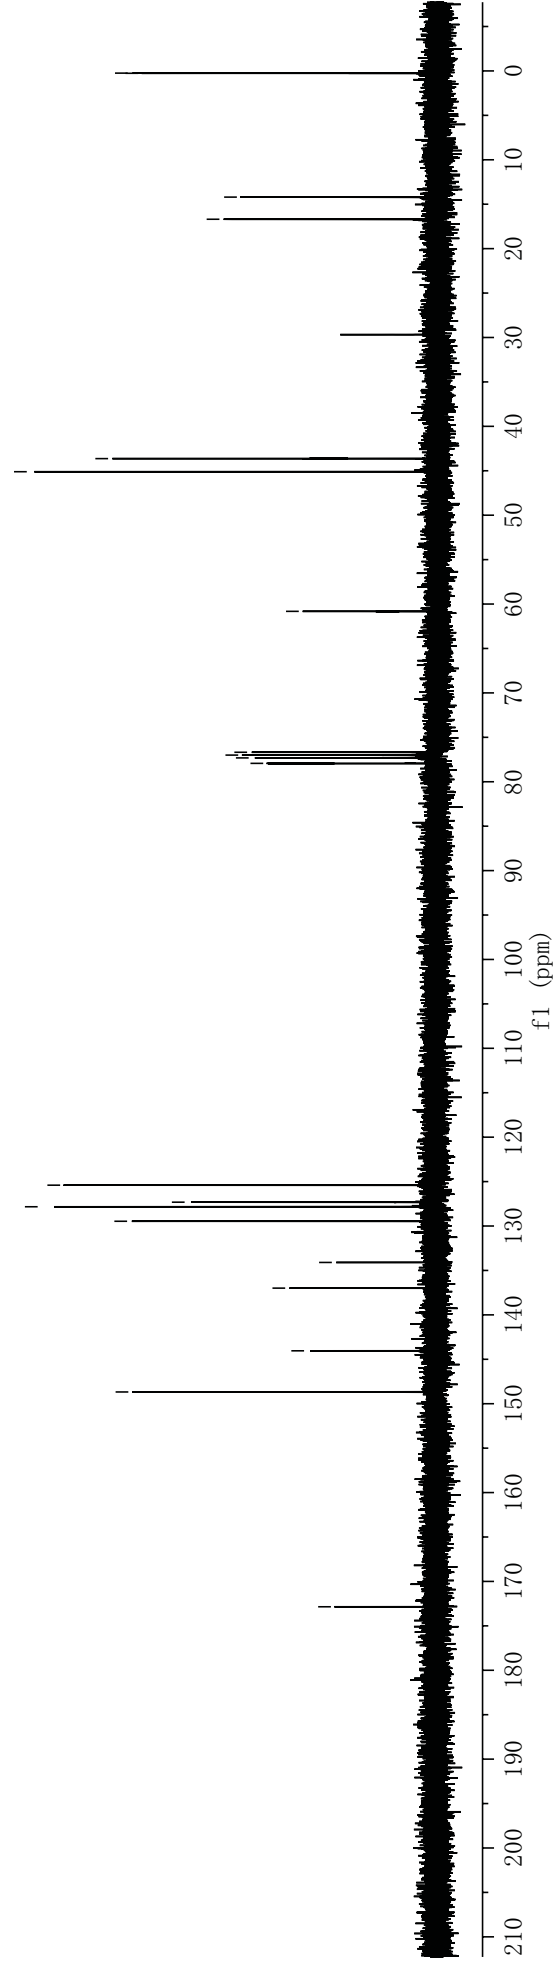

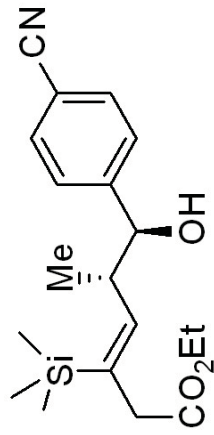

2d

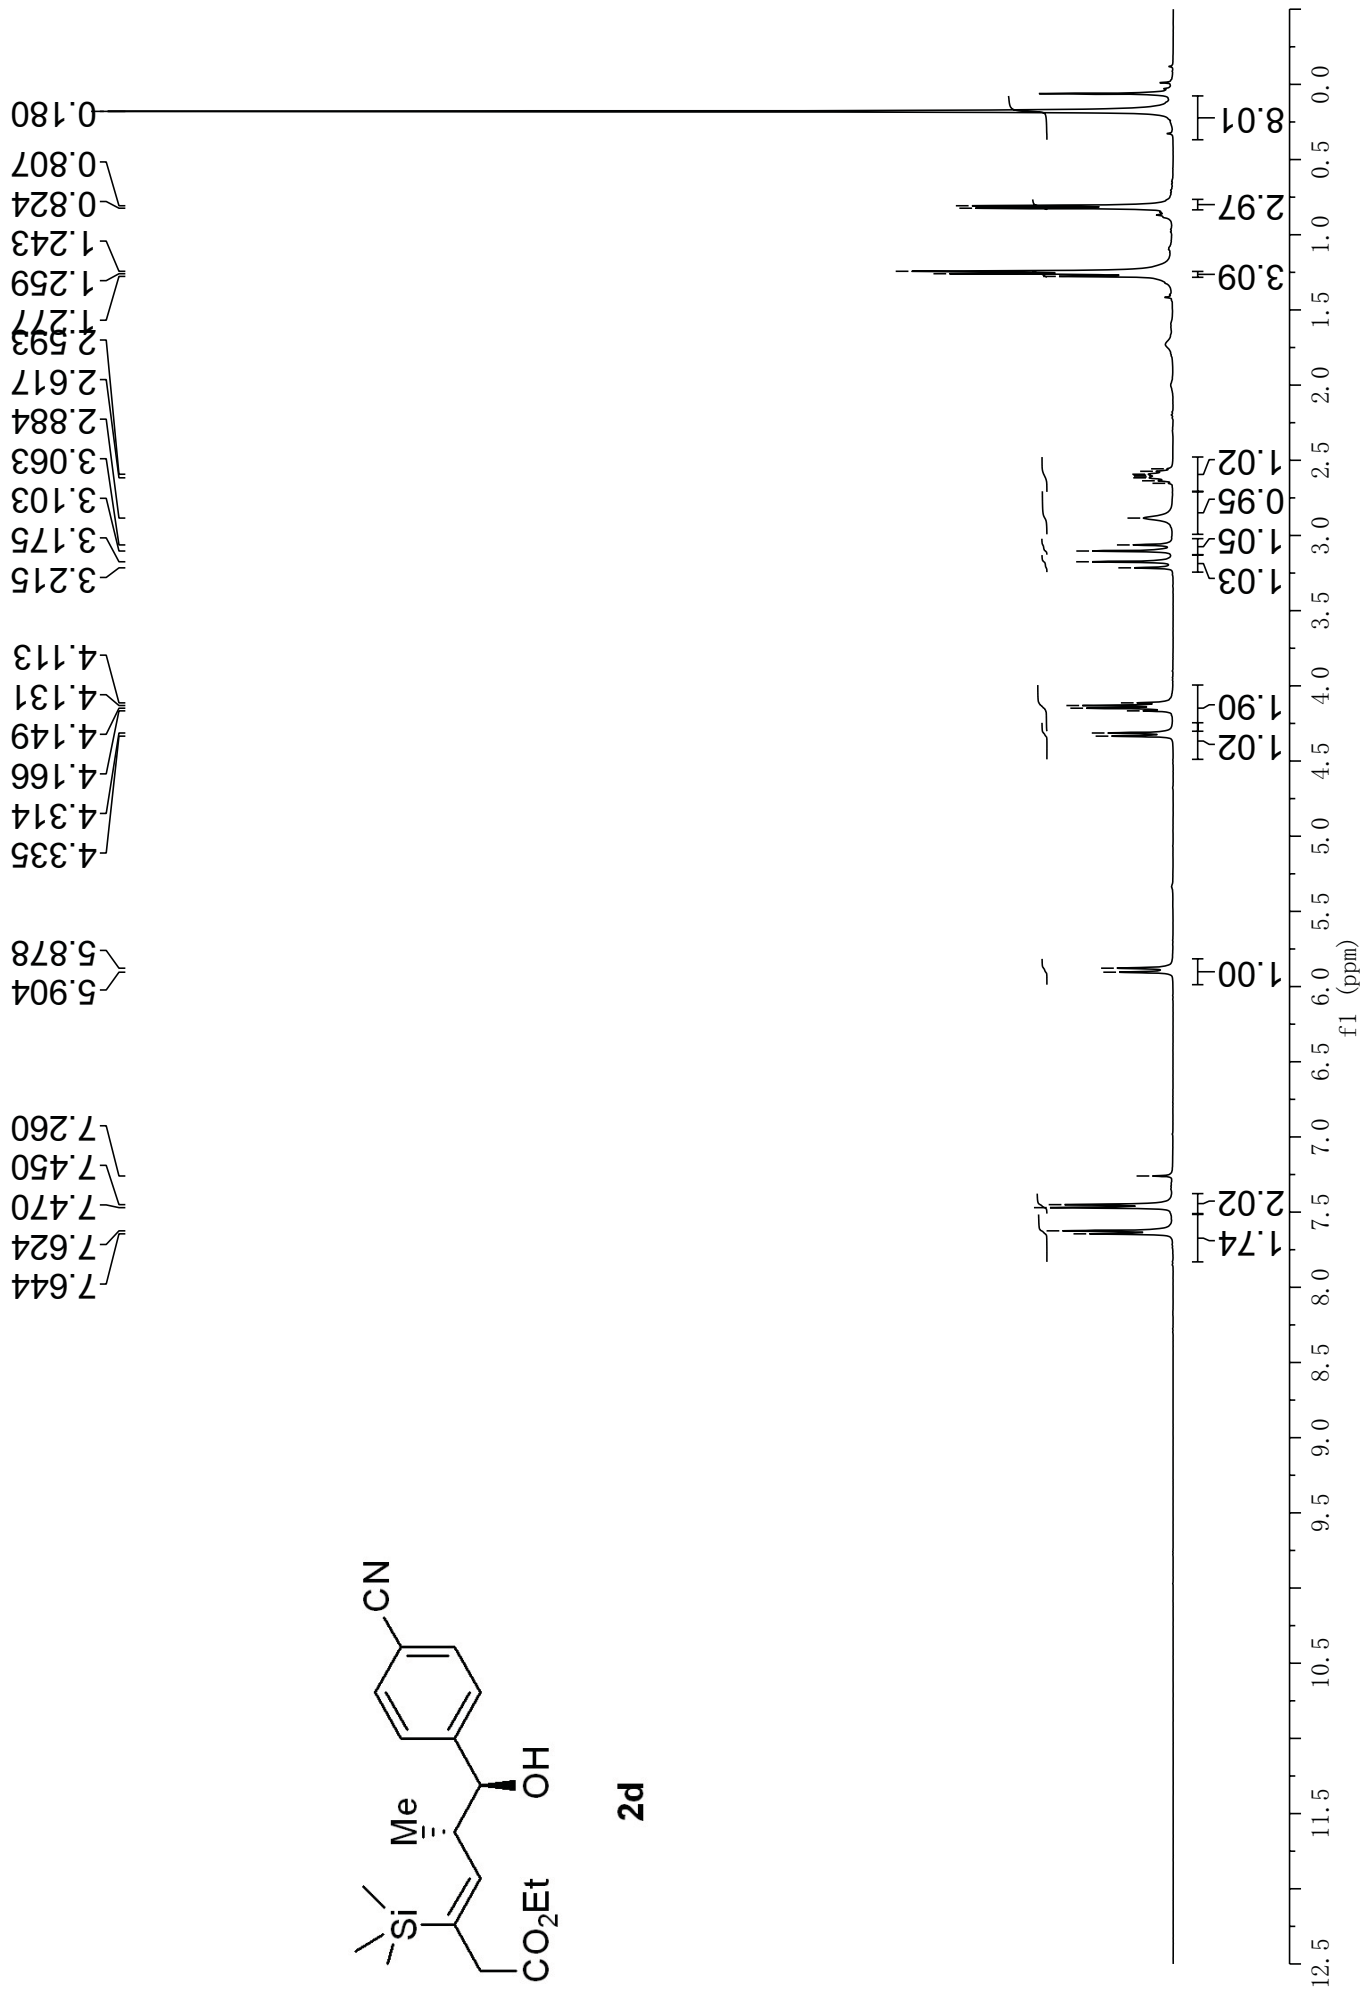

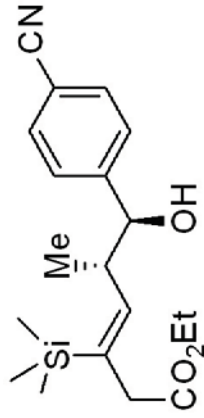

2d

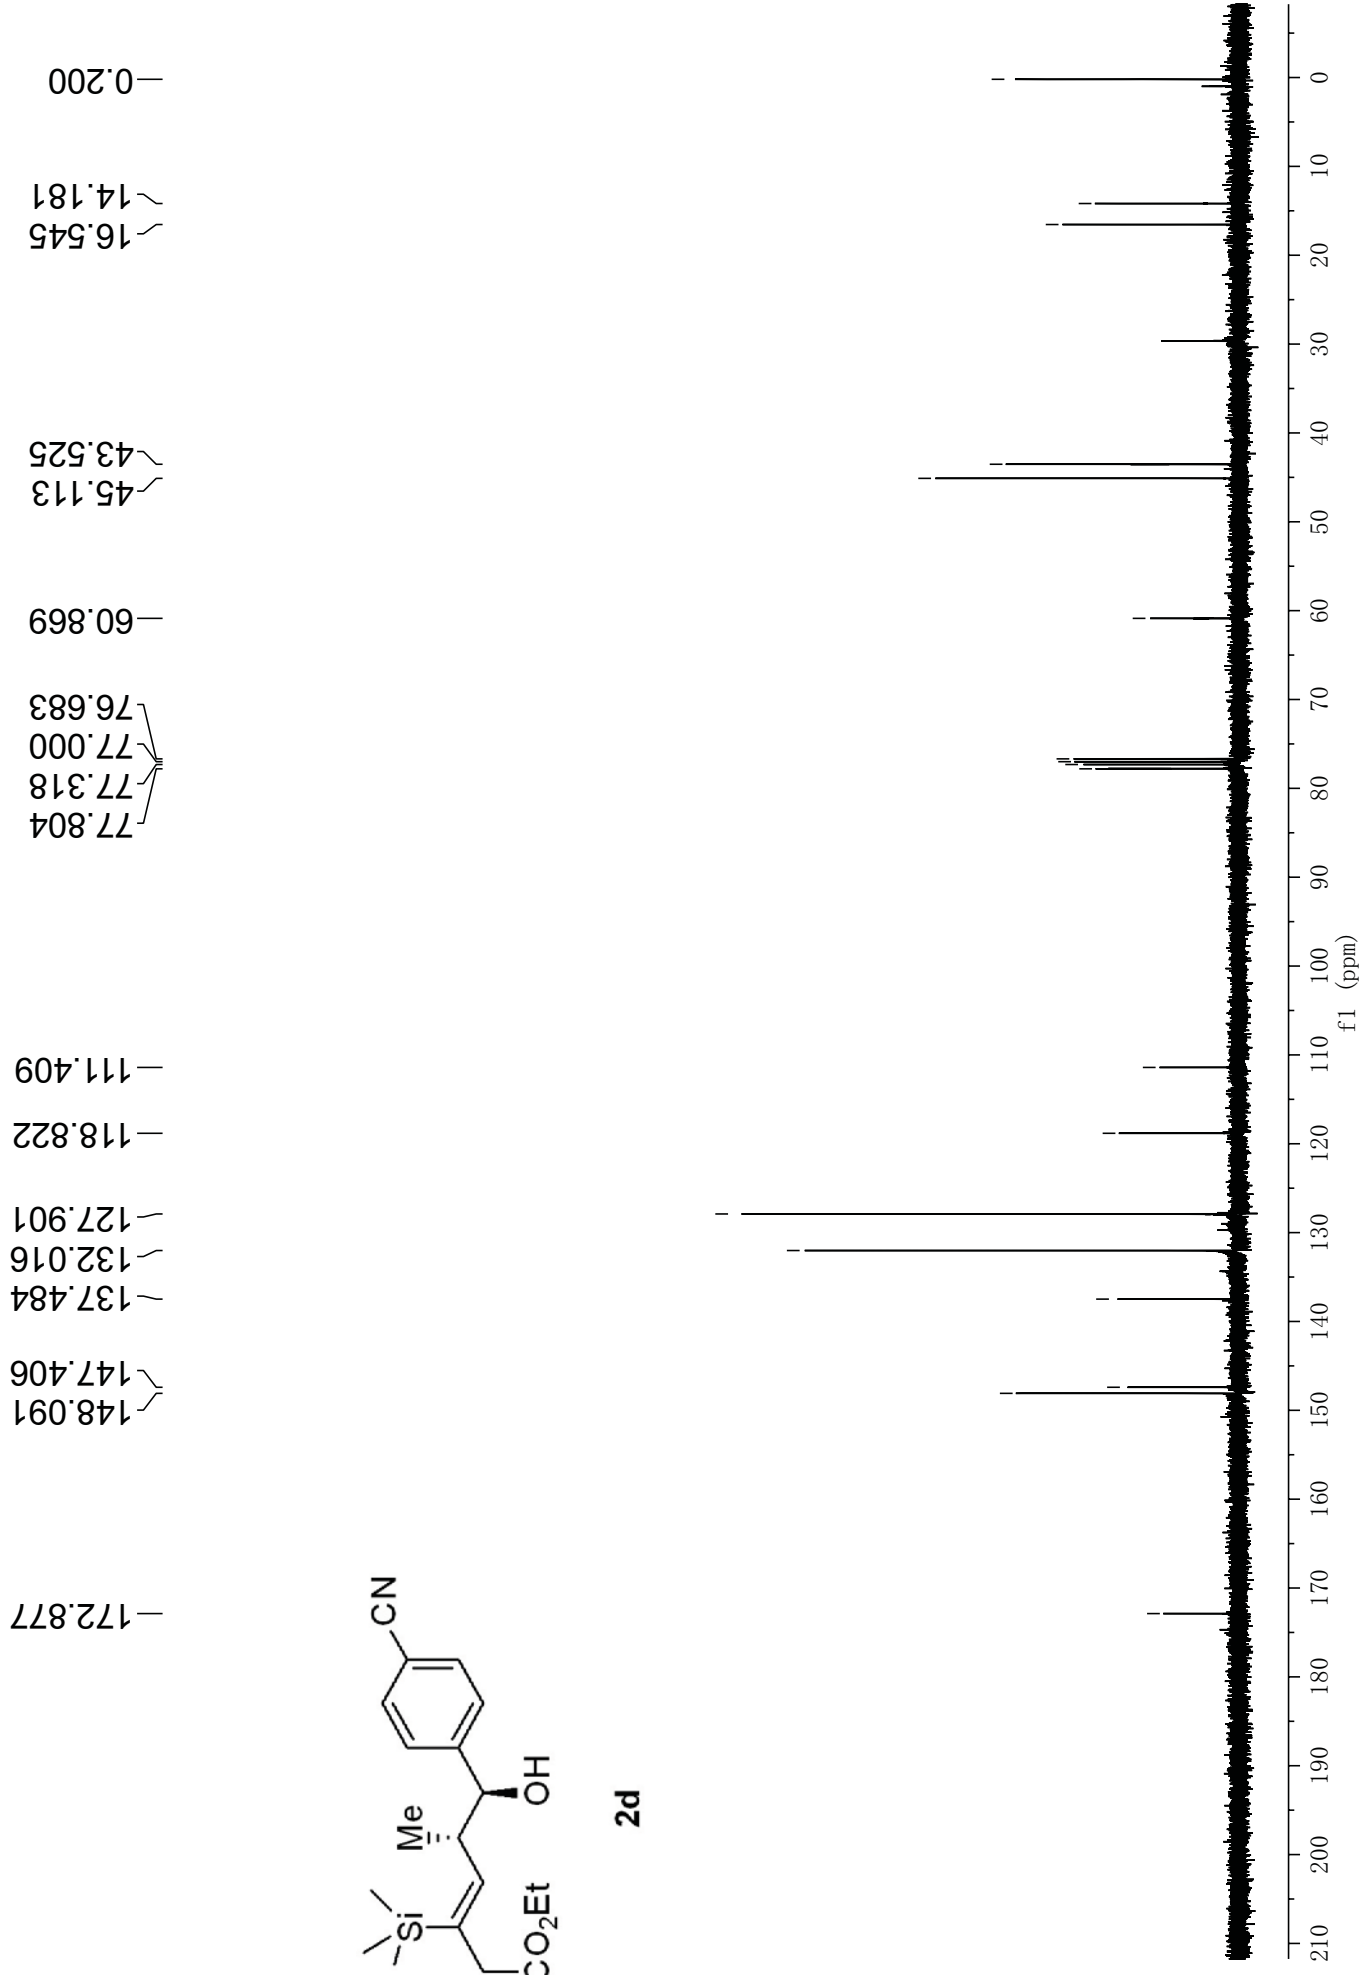

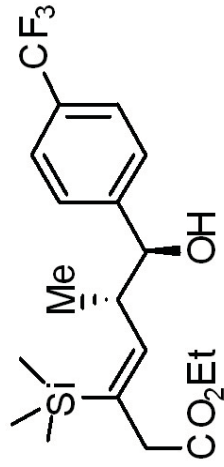

**2e**

7.613  
7.593  
7.479  
7.459  
7.260  
5.930  
5.903  
4.345  
4.324  
4.171  
4.153  
4.136  
4.118  
3.222  
3.182  
3.118  
3.077  
2.806  
2.656  
2.533  
2.281  
1.262  
1.254  
0.828  
0.811  
0.197

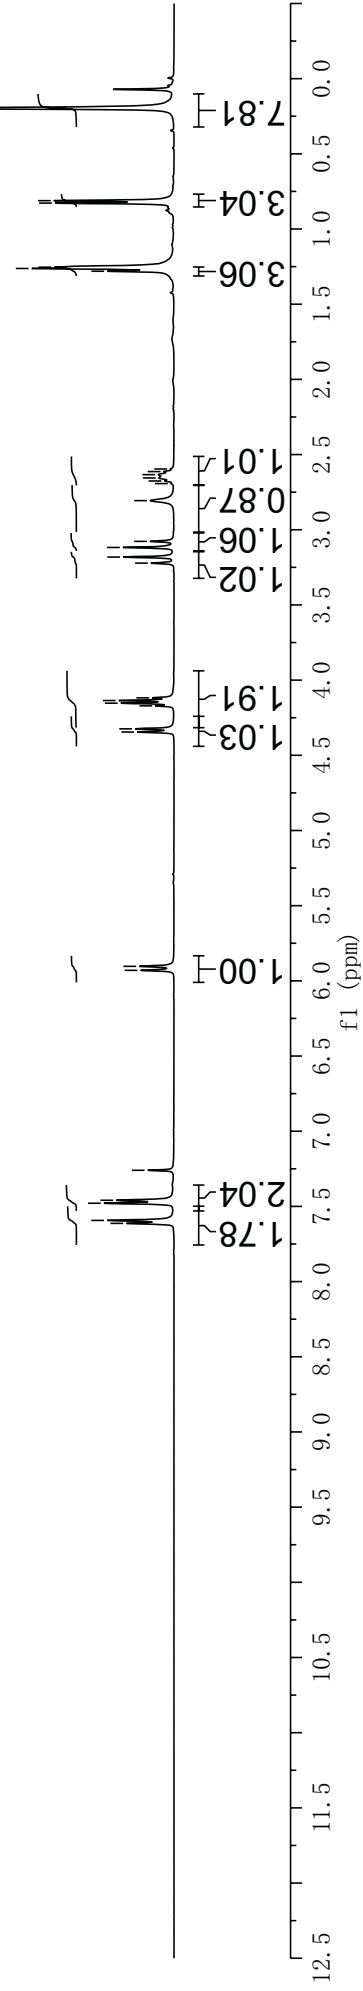

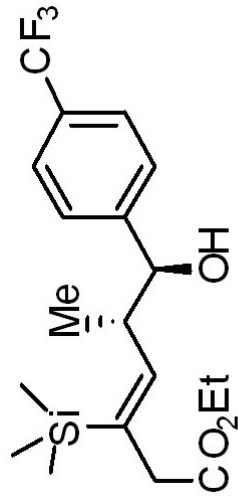

2e

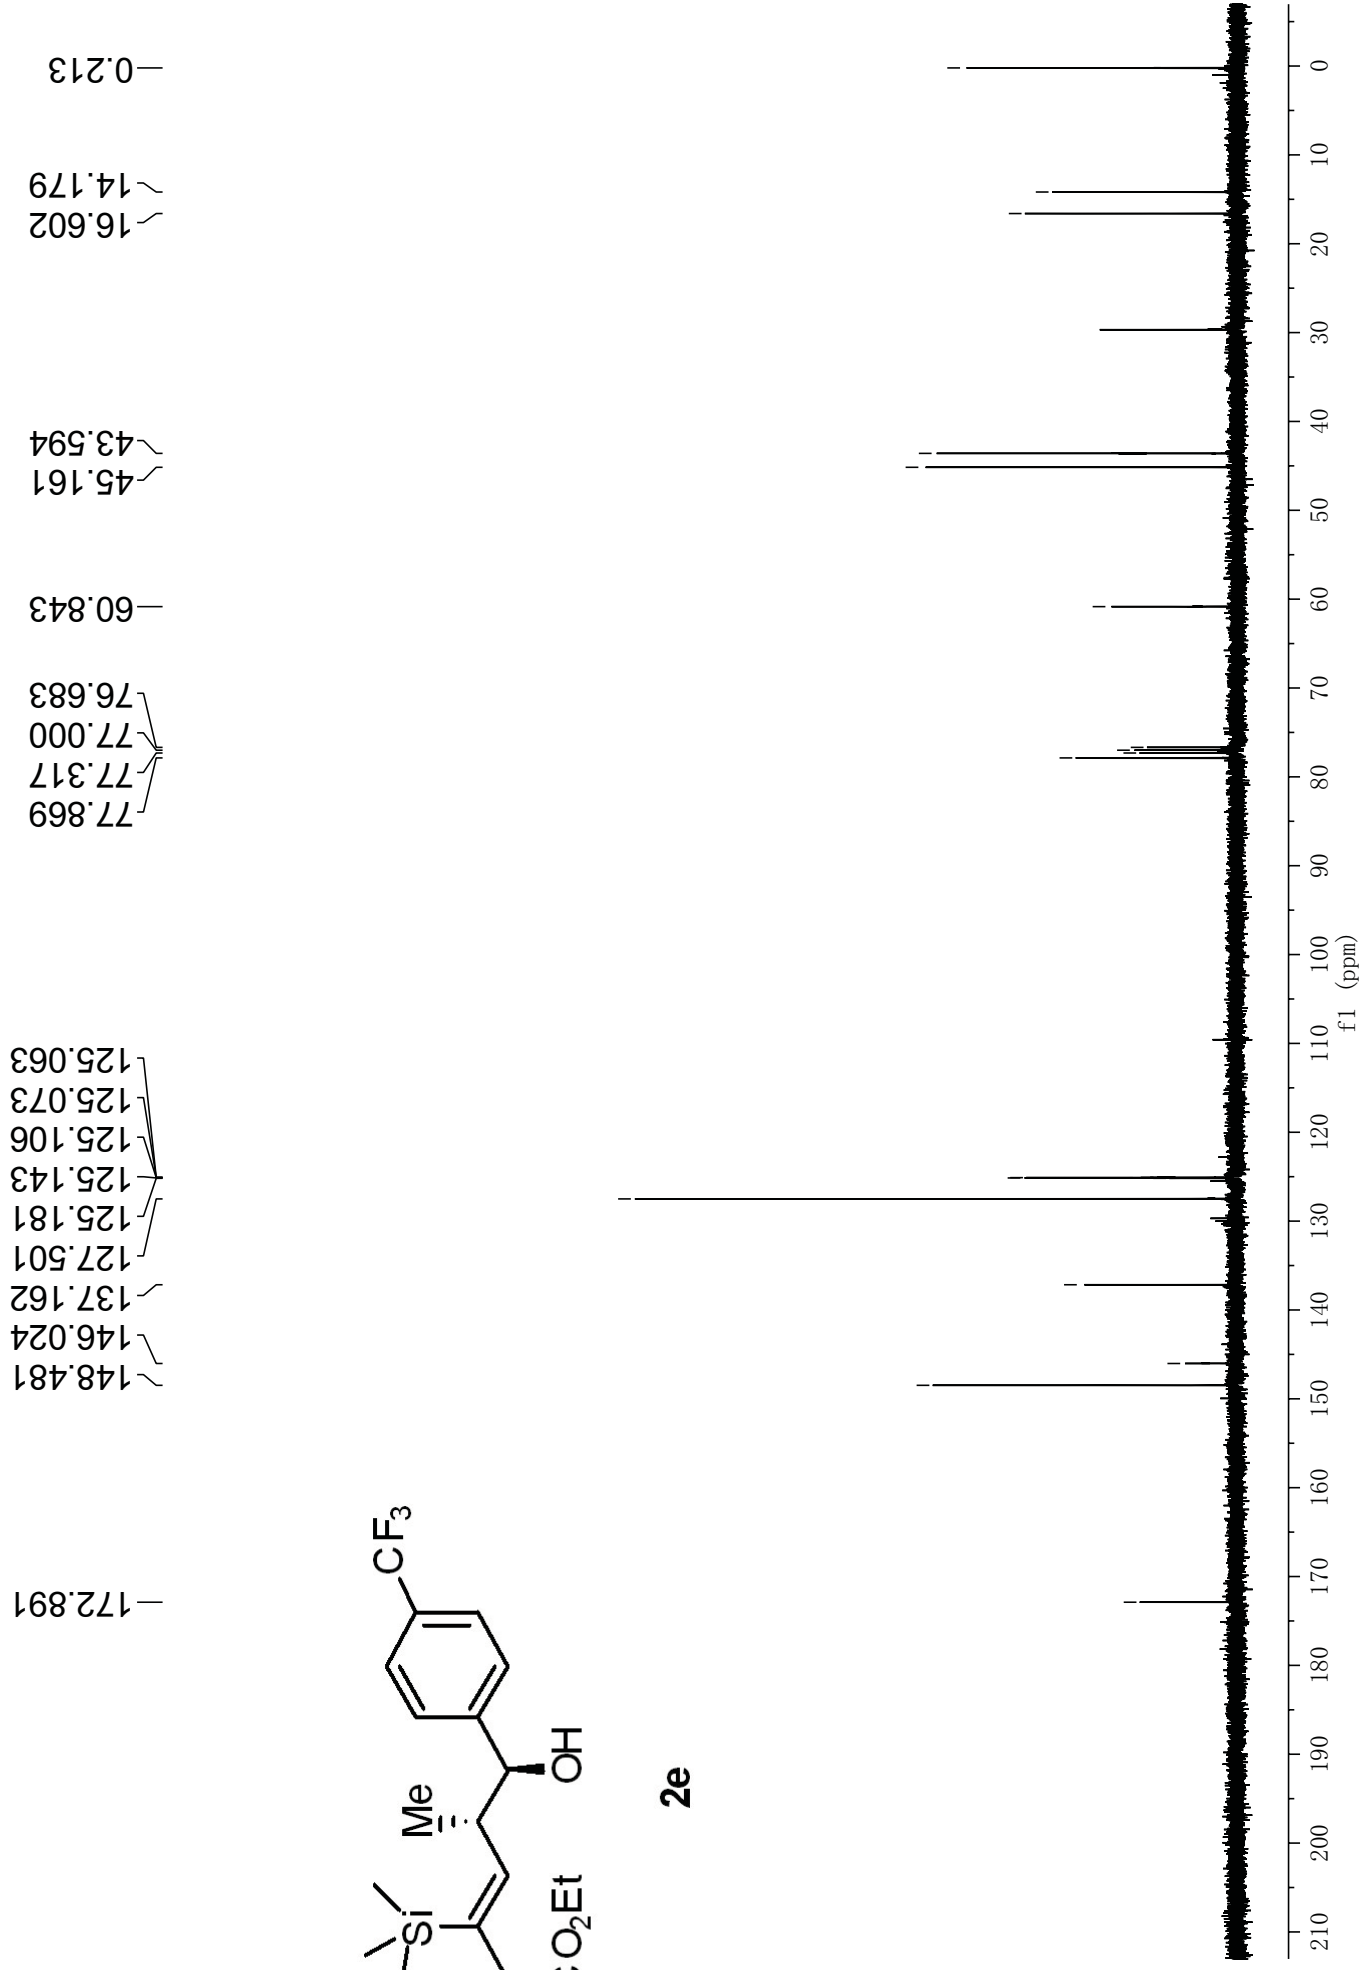

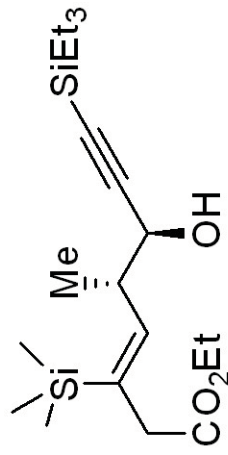

2h

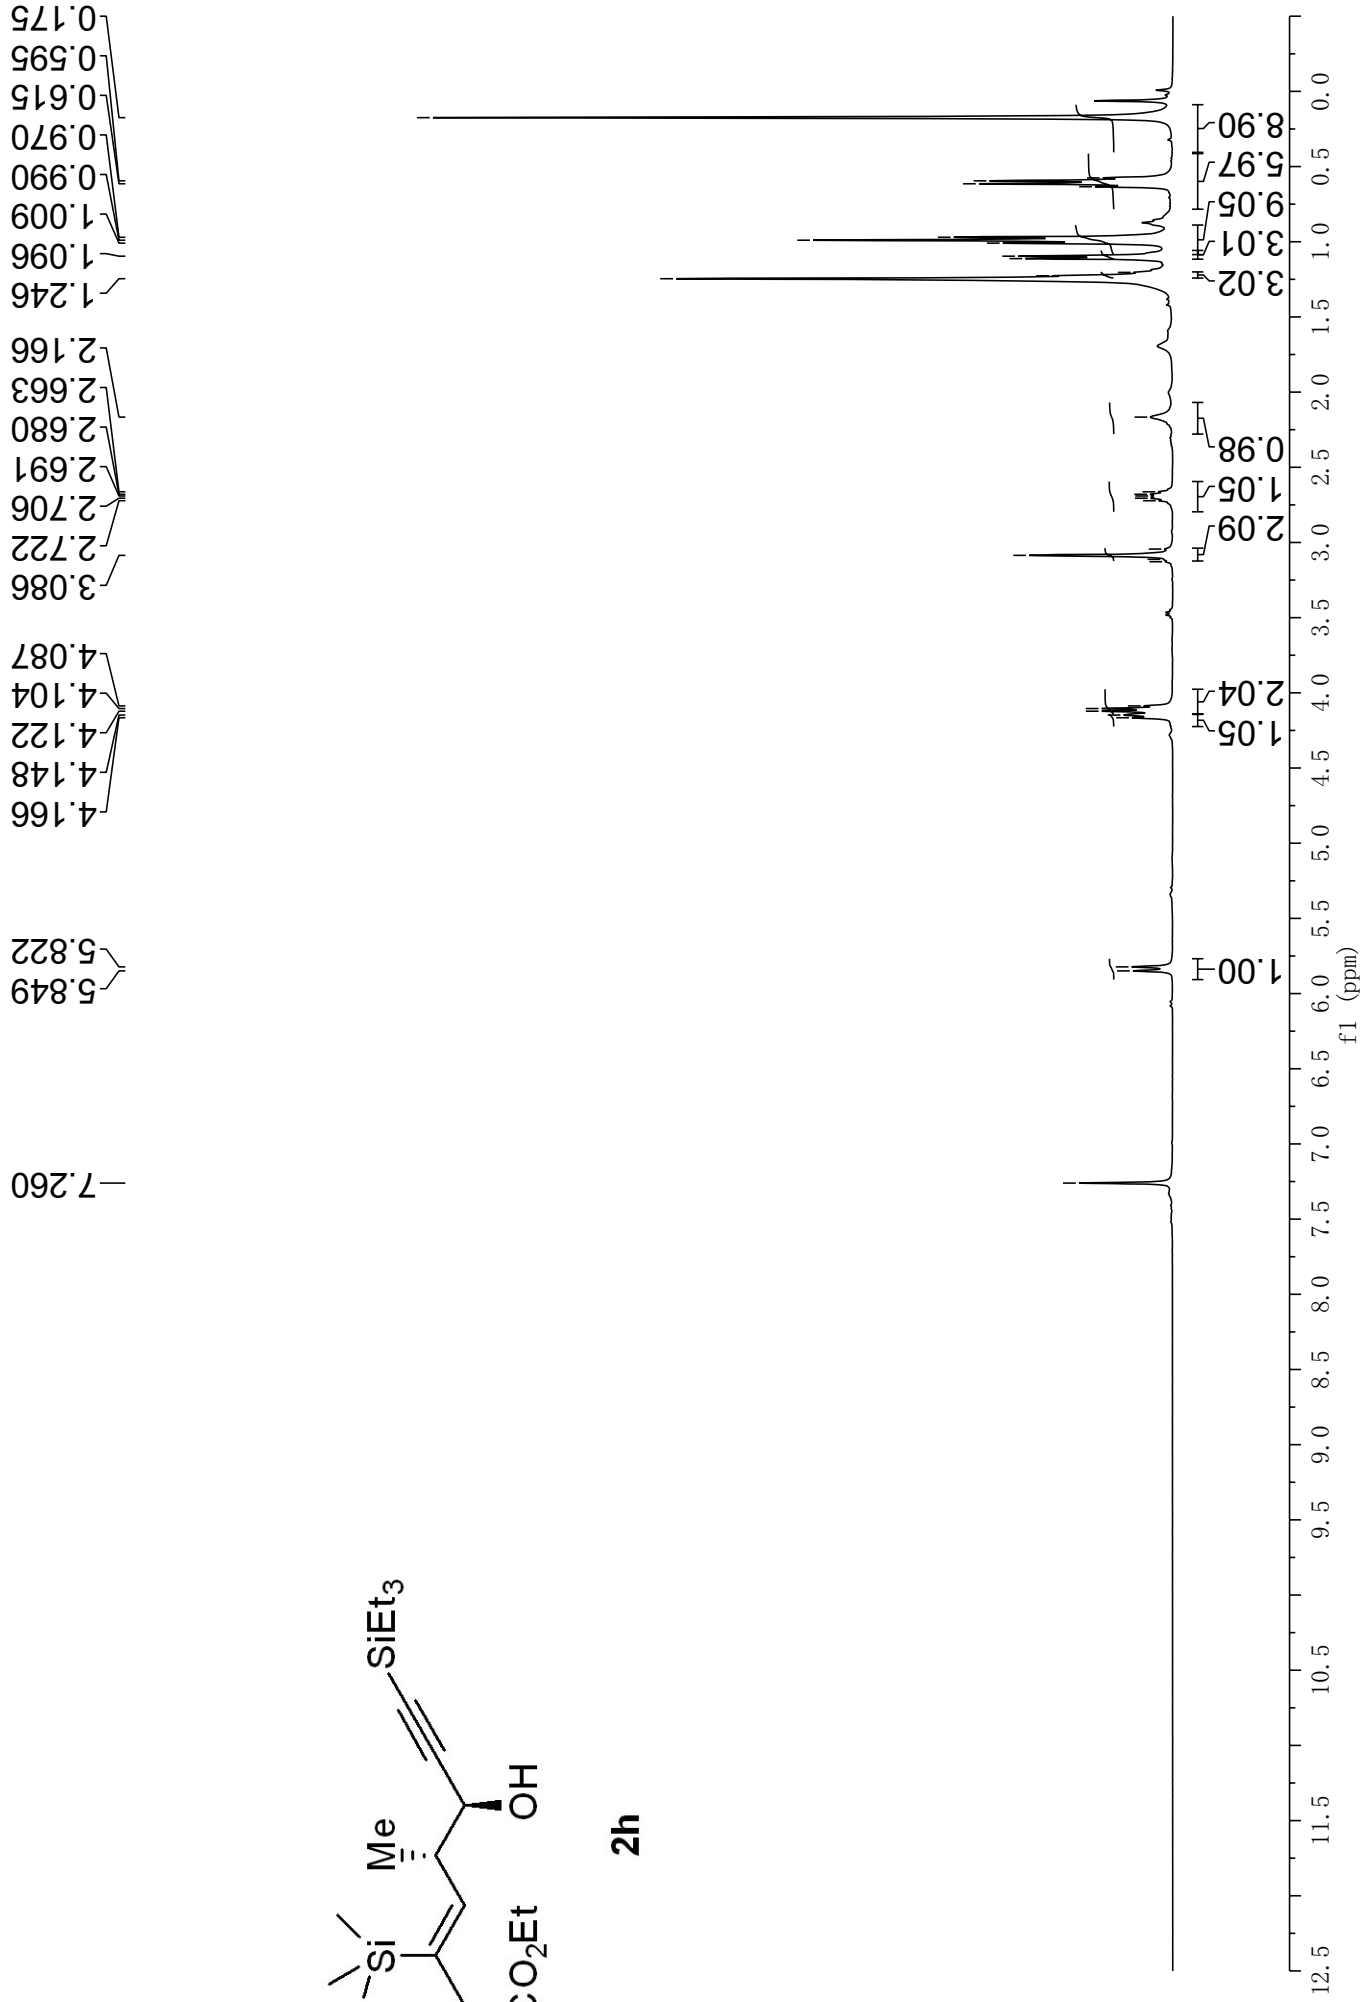



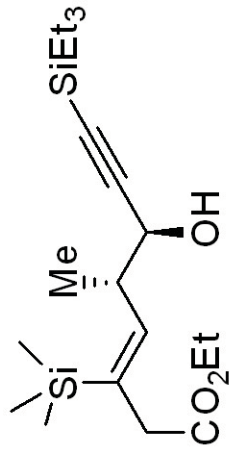

2h

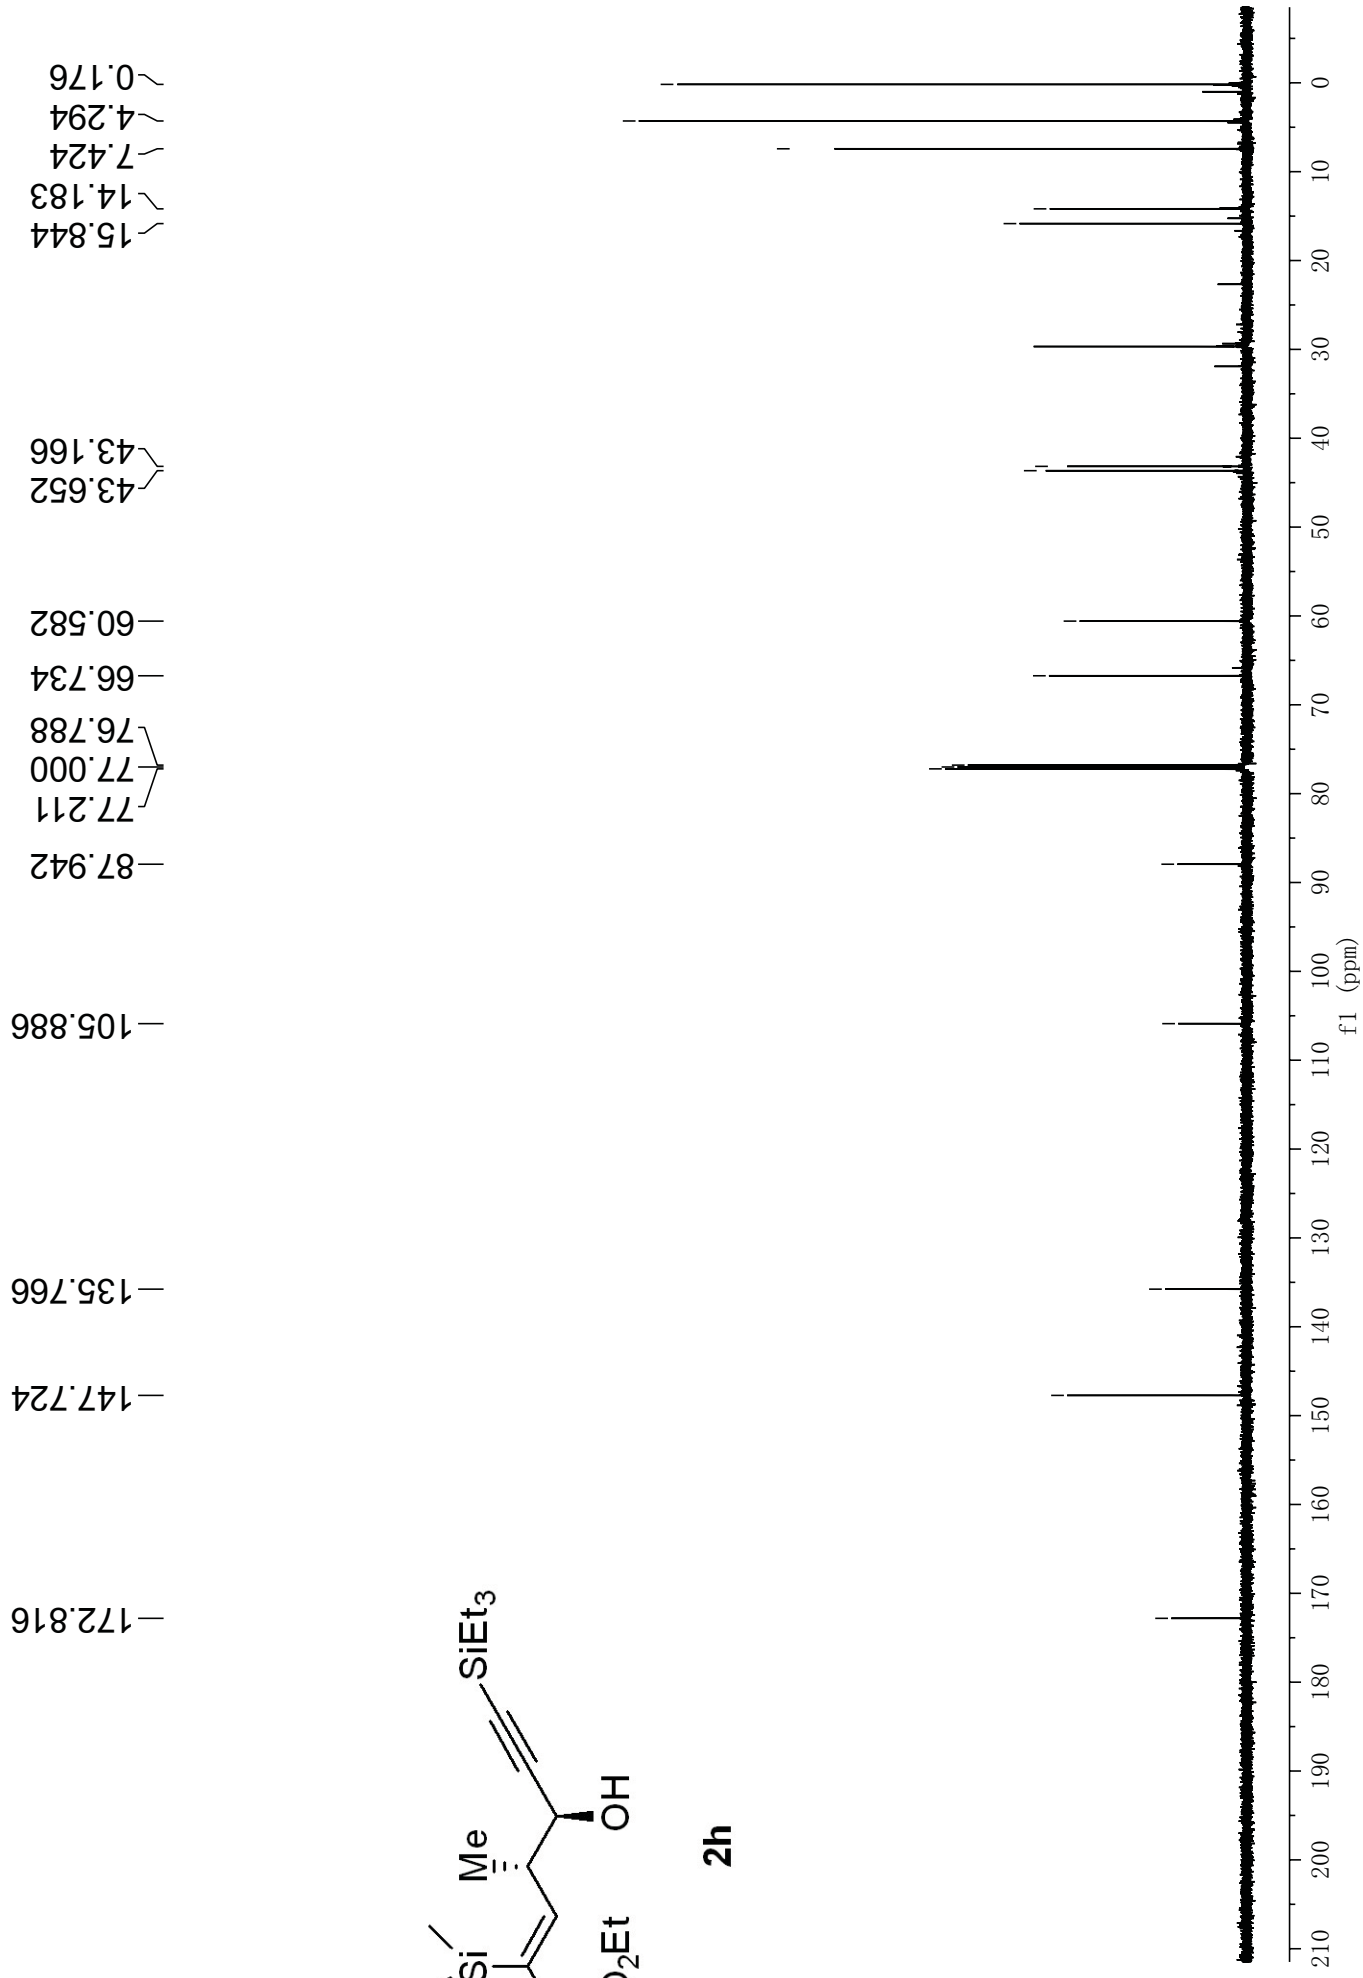

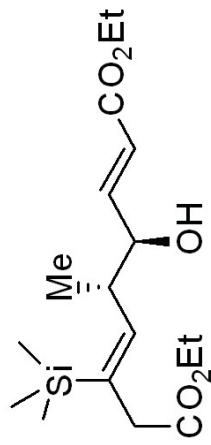

2g

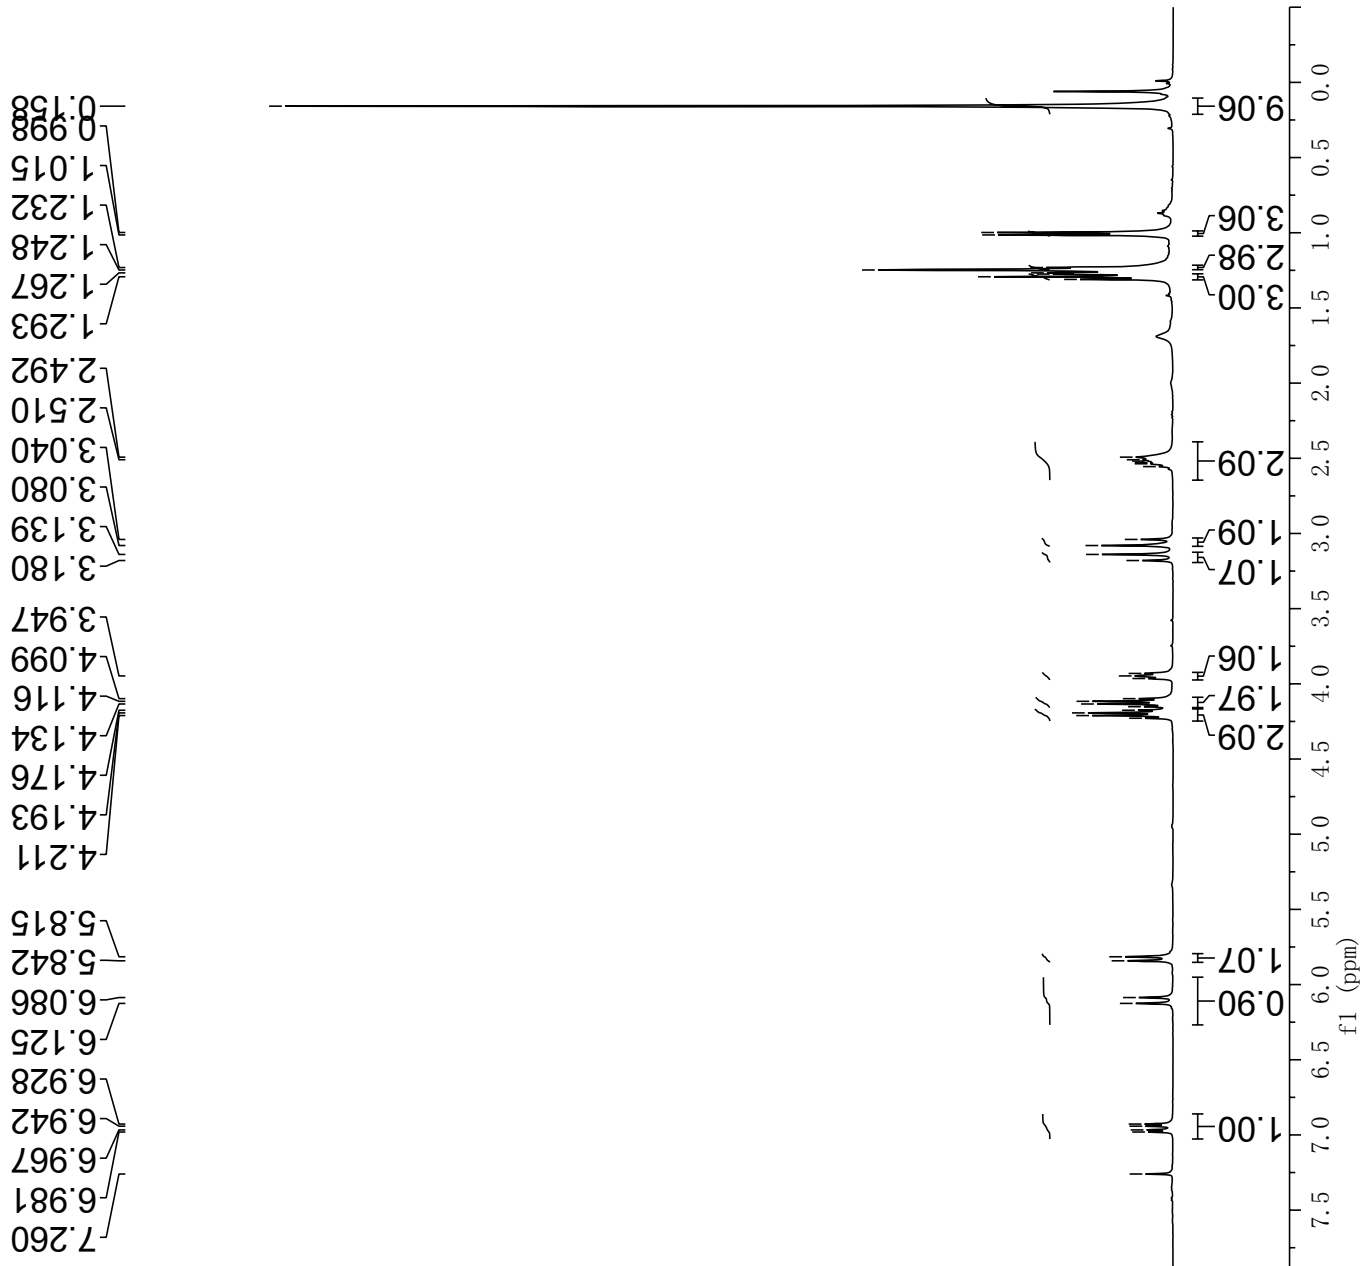

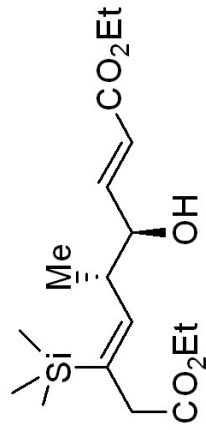

2g

|         |         |         |         |         |         |        |        |        |        |        |        |        |        |        |        |        |       |
|---------|---------|---------|---------|---------|---------|--------|--------|--------|--------|--------|--------|--------|--------|--------|--------|--------|-------|
| 172.892 | 166.415 | 147.902 | 147.159 | 137.244 | 121.961 | 77.317 | 77.000 | 76.683 | 74.482 | 60.824 | 60.415 | 43.495 | 43.169 | 16.355 | 14.221 | 14.170 | 0.188 |
|---------|---------|---------|---------|---------|---------|--------|--------|--------|--------|--------|--------|--------|--------|--------|--------|--------|-------|

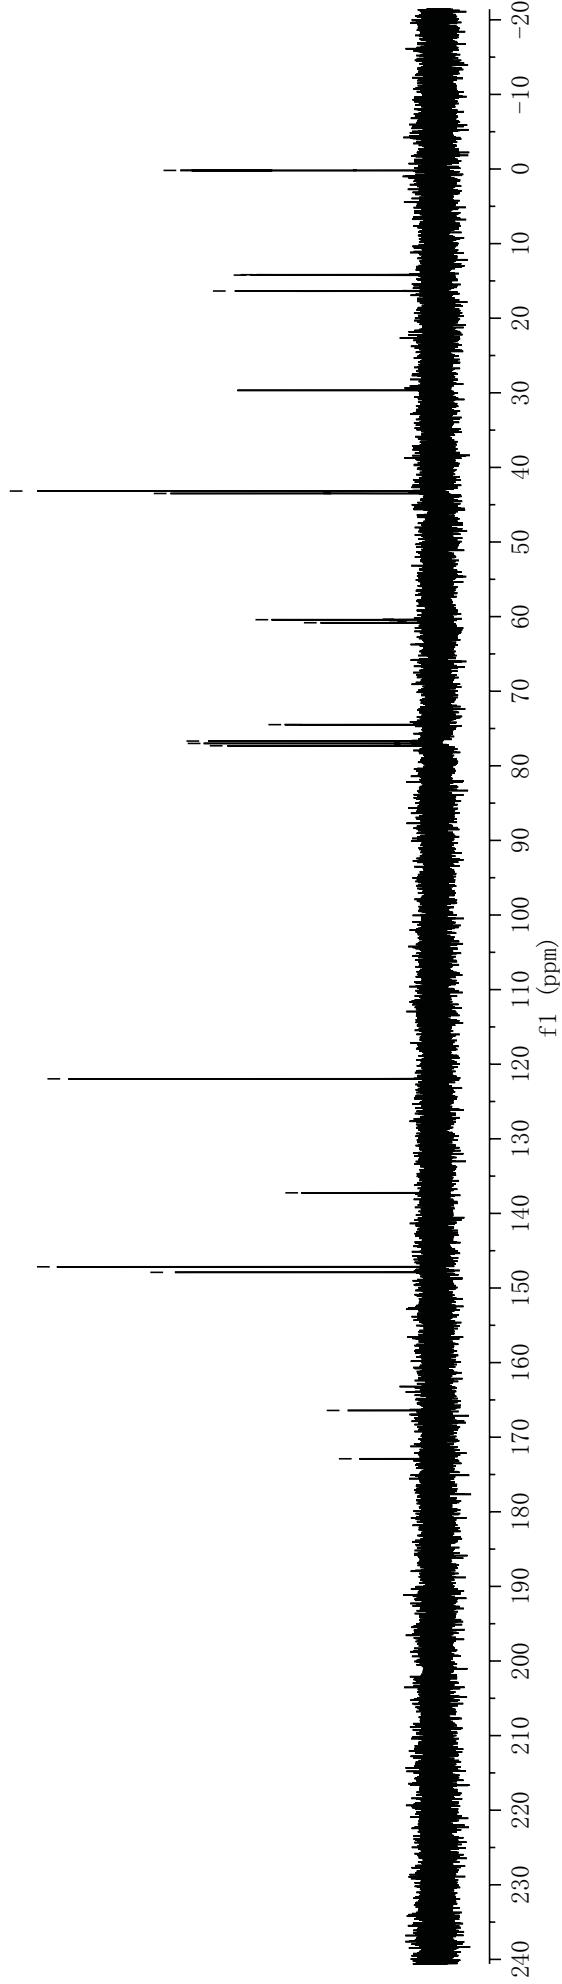

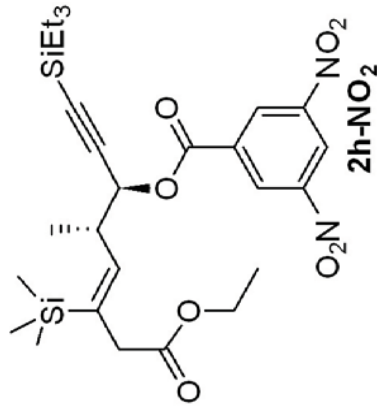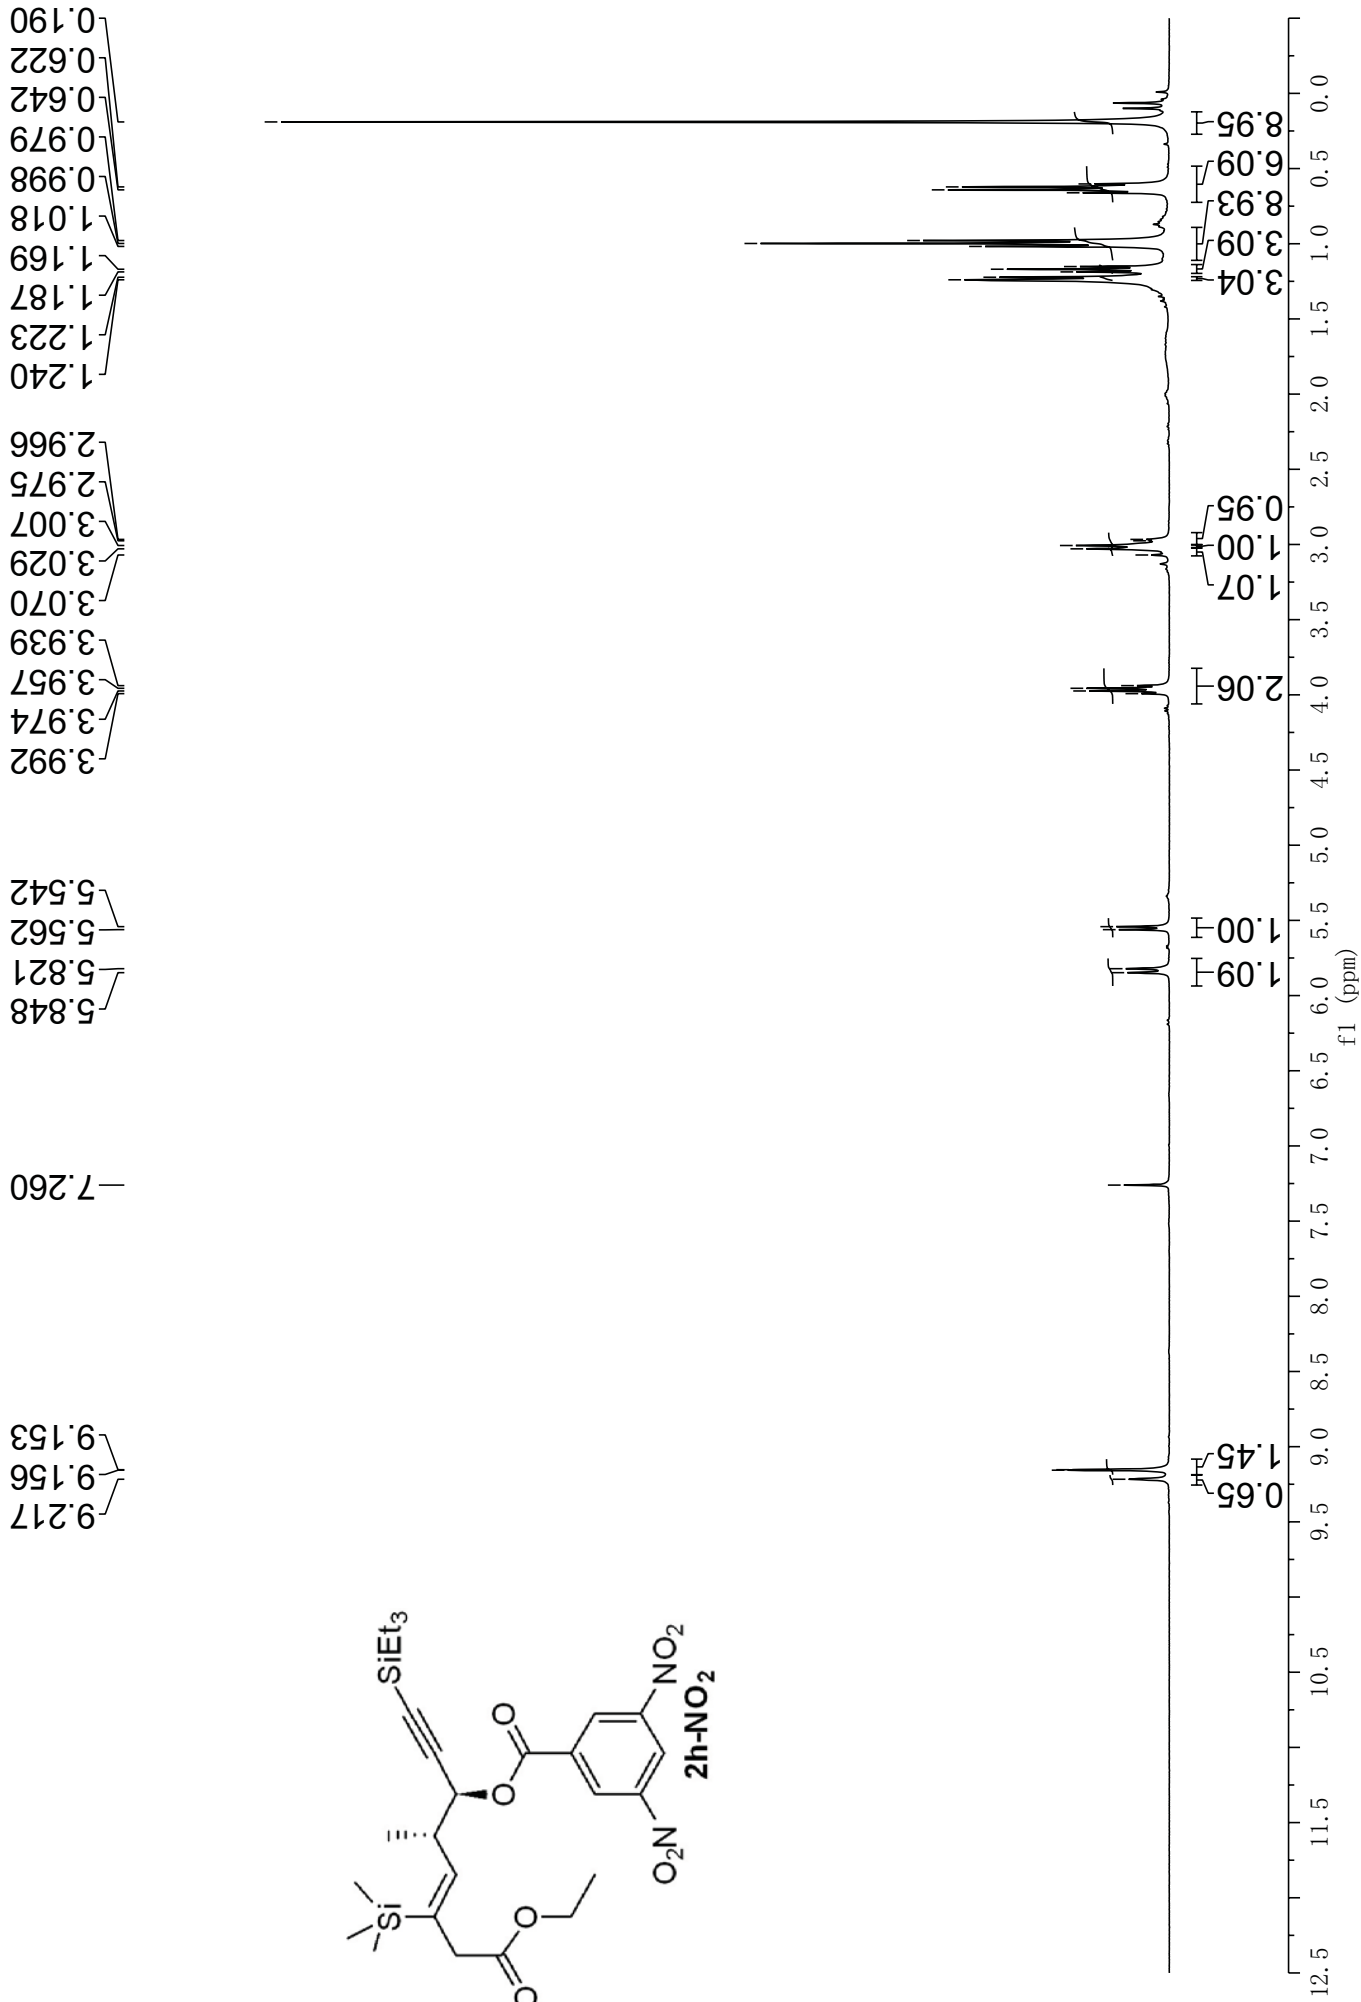

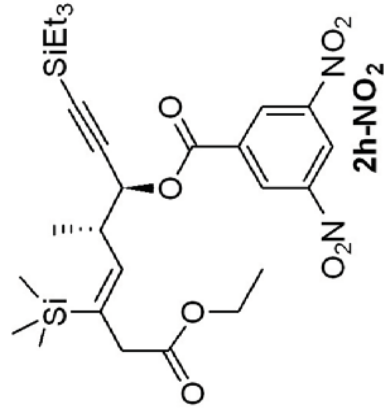

- 172.343
- 161.438
- ~148.528
- ~146.013
- 135.787
- ~133.697
- ~129.815
- 122.346
- 100.938
- 90.944
- 77.211
- 77.000
- 76.788
- 70.102
- 60.331
- ~43.466
- ~41.462
- ~16.638
- ~14.116
- ~7.399
- ~4.146
- ~0.070

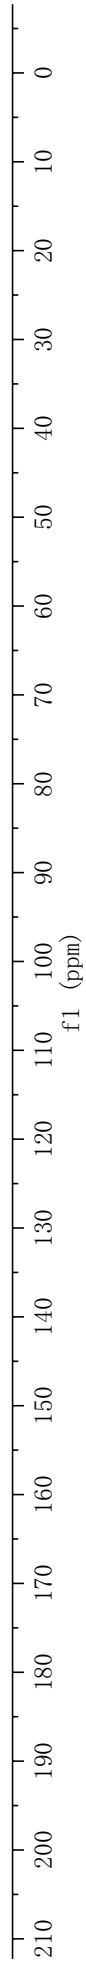

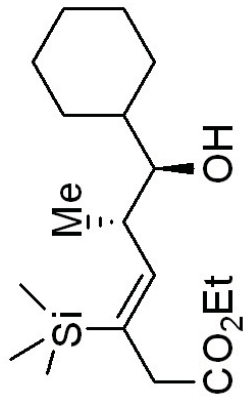

2i

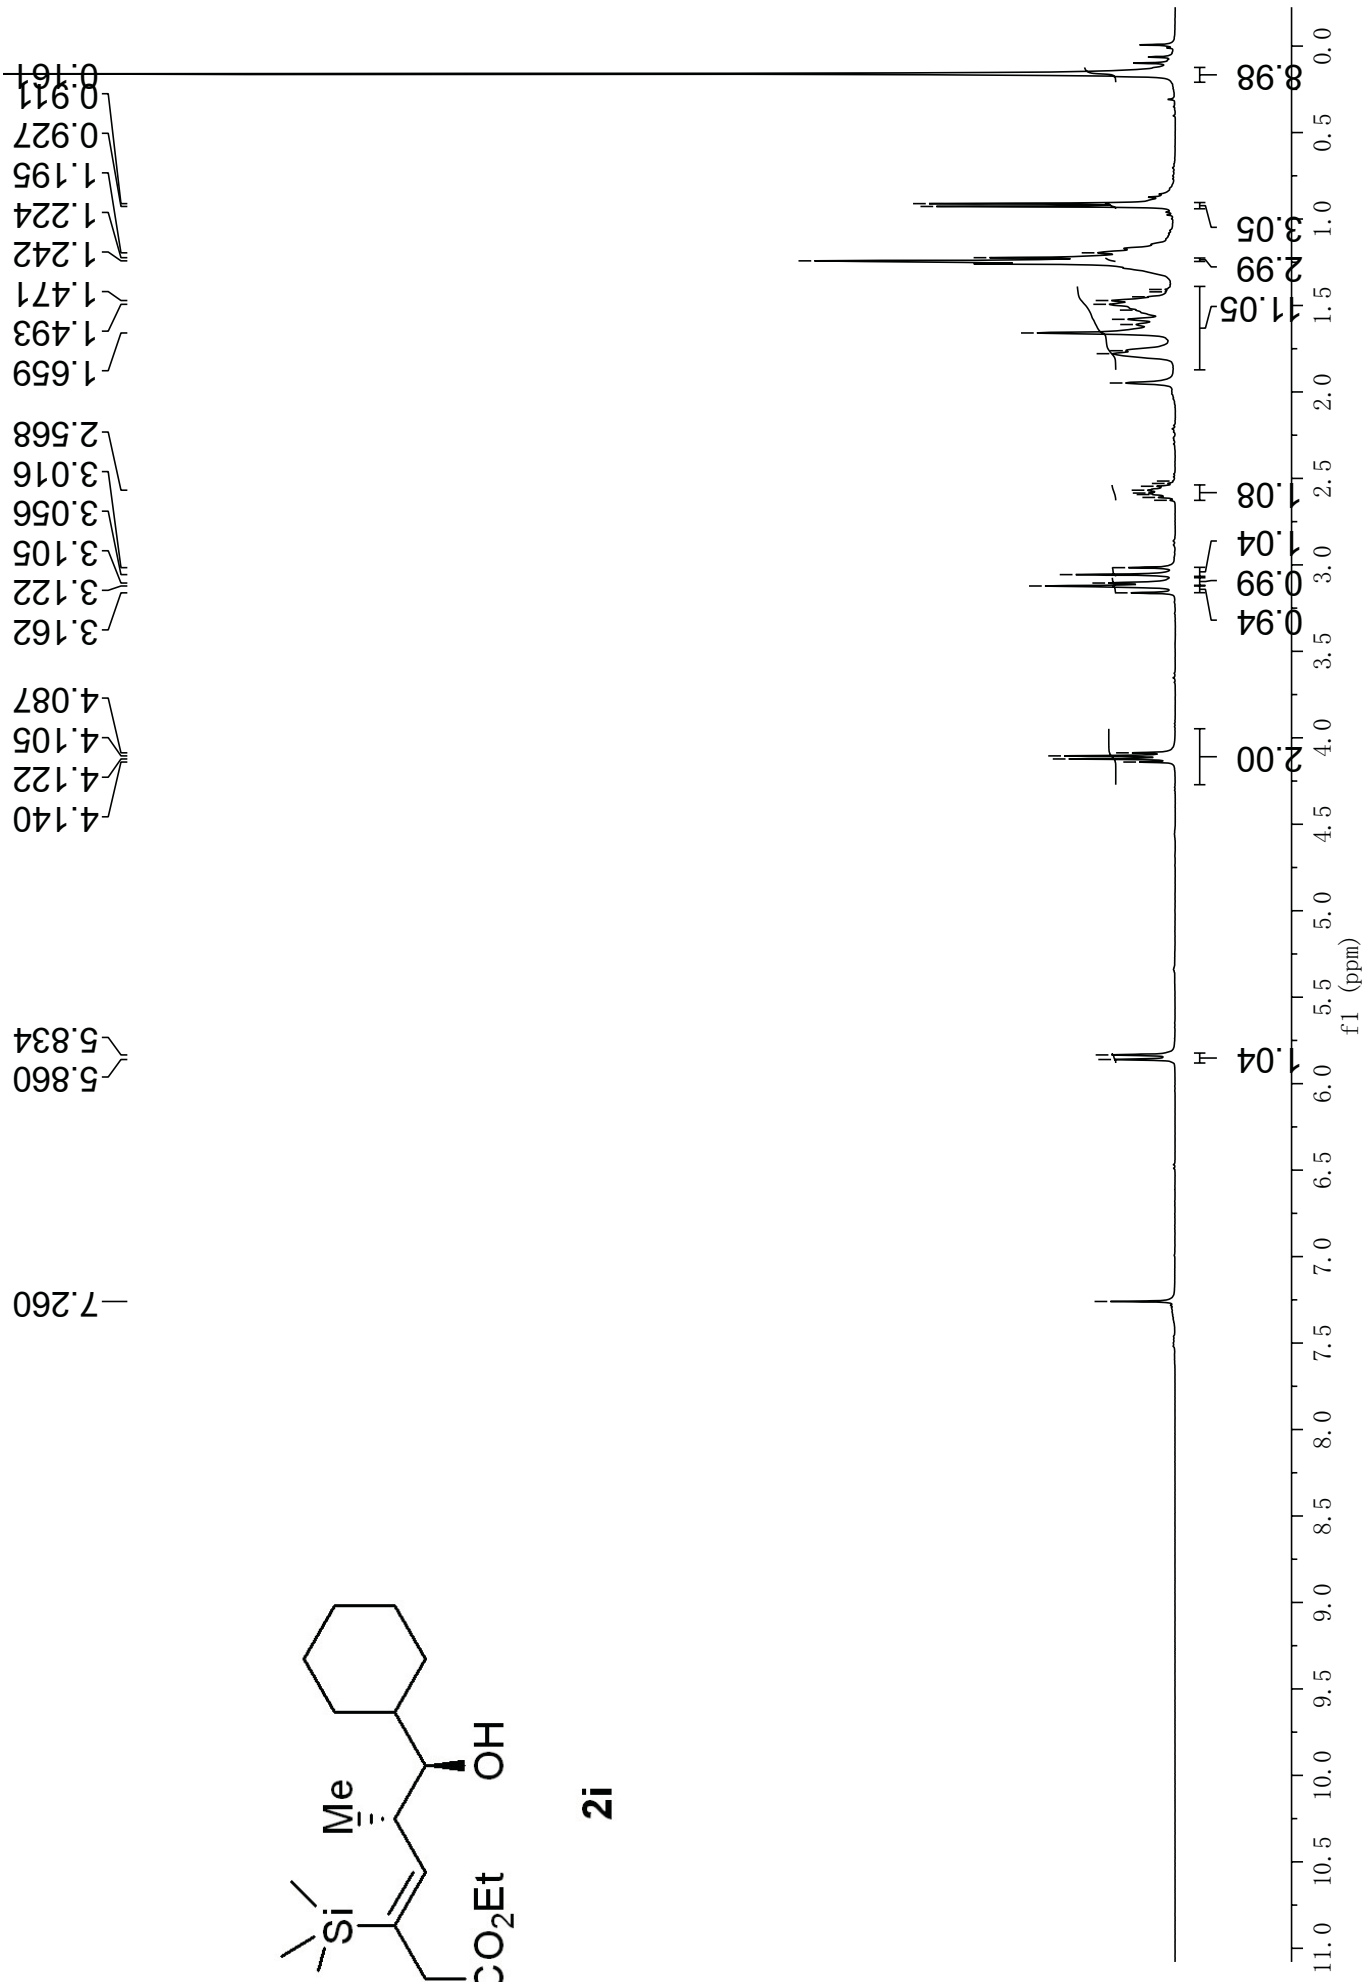

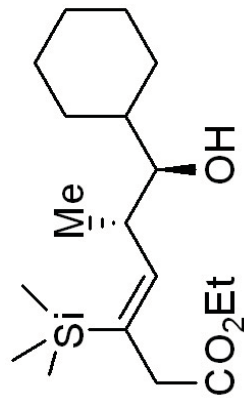

2i

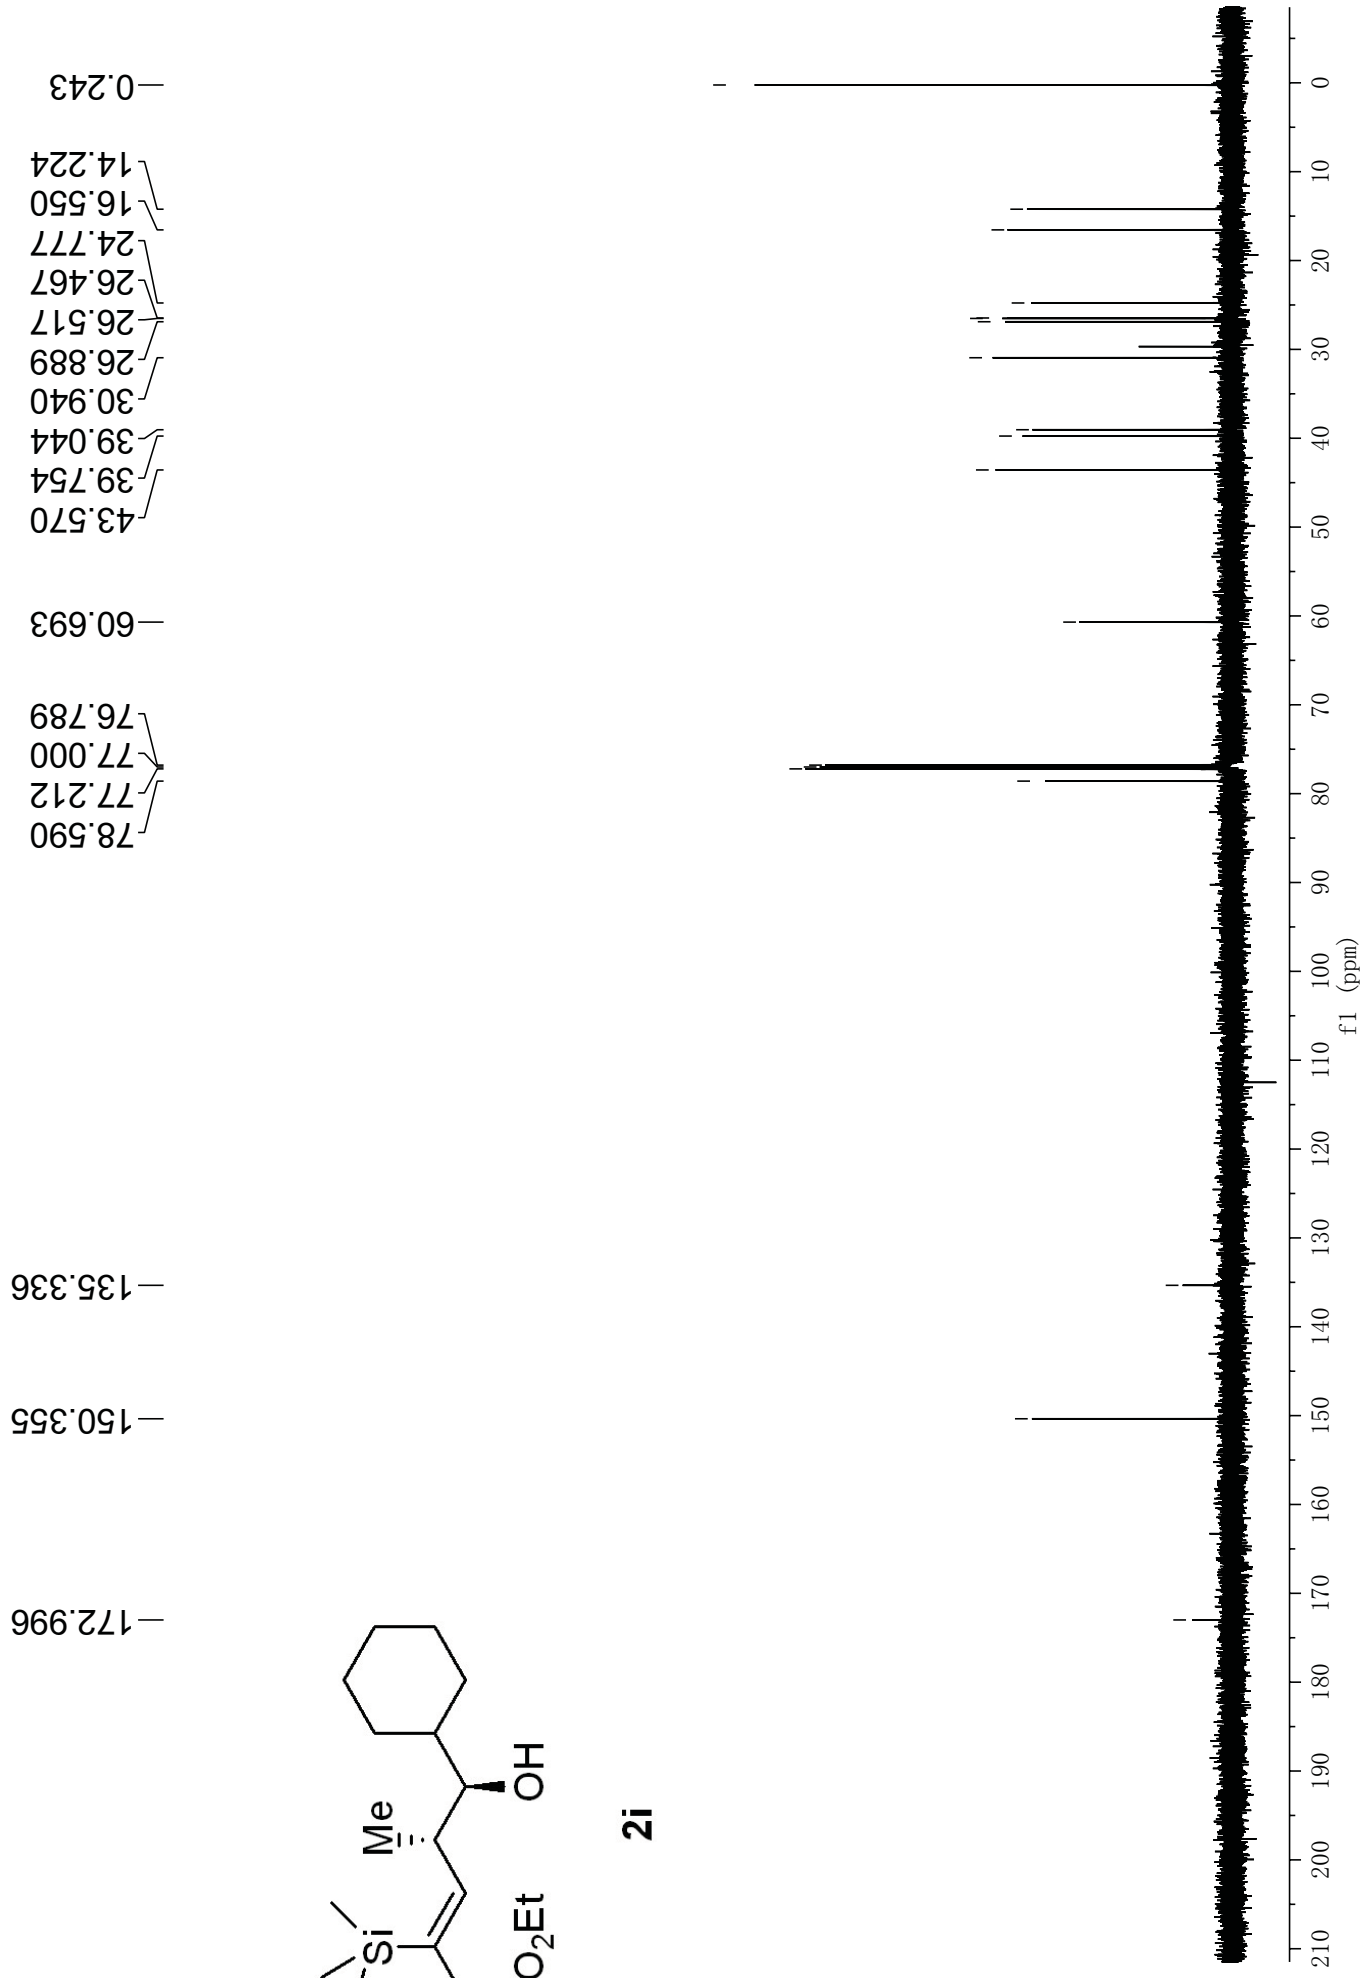

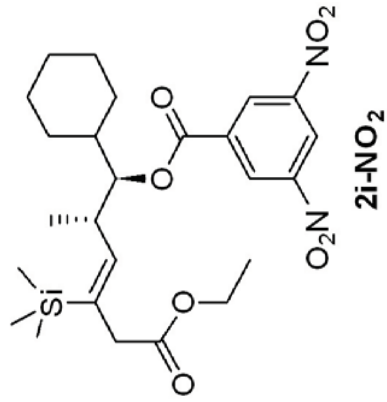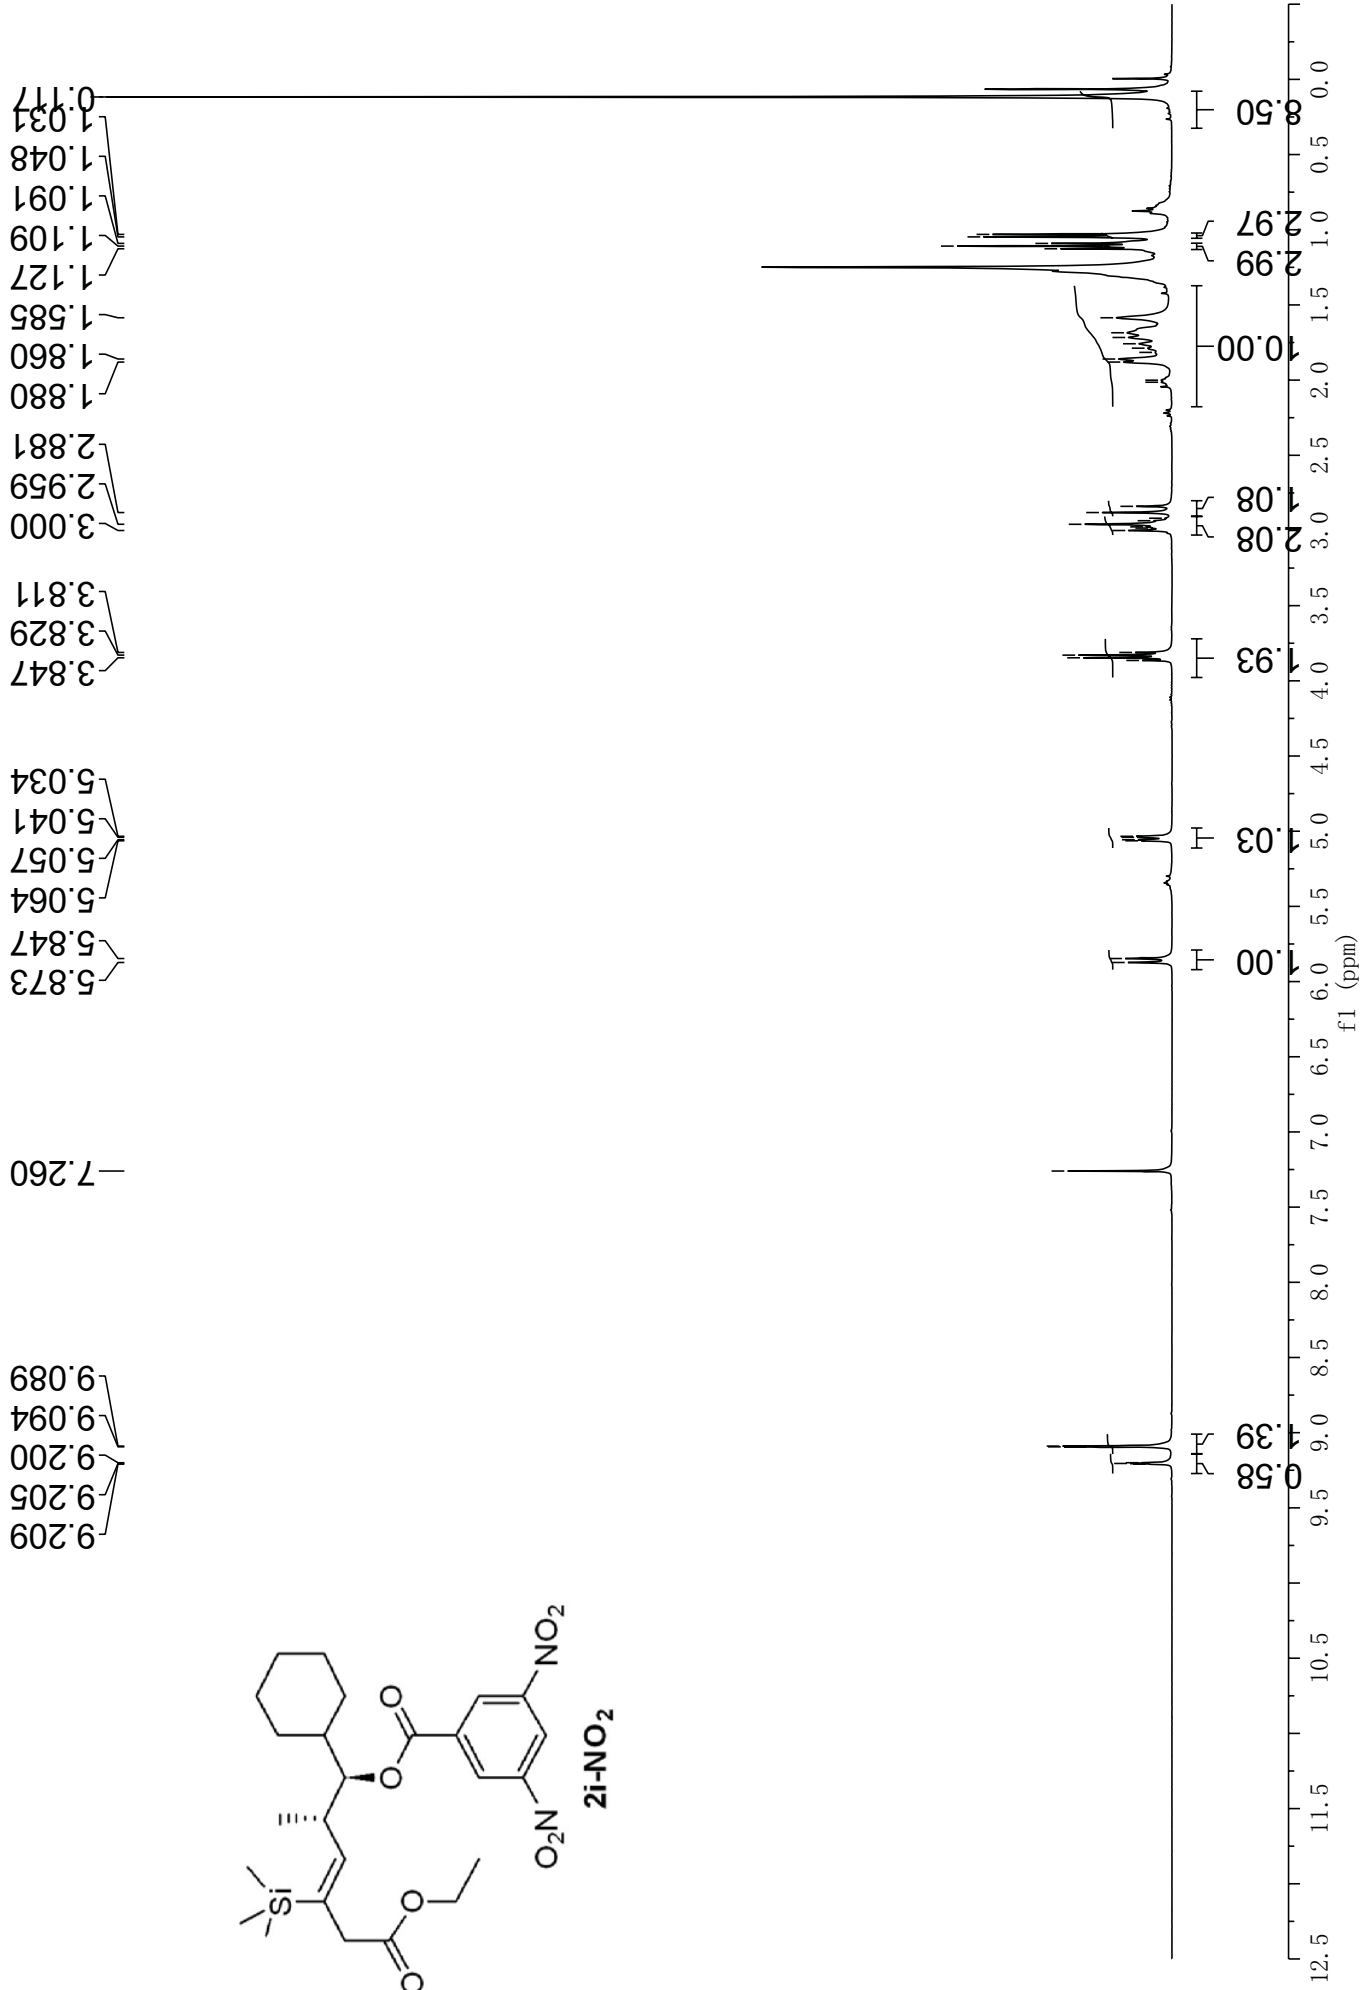



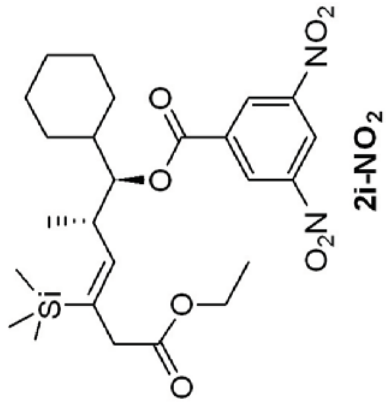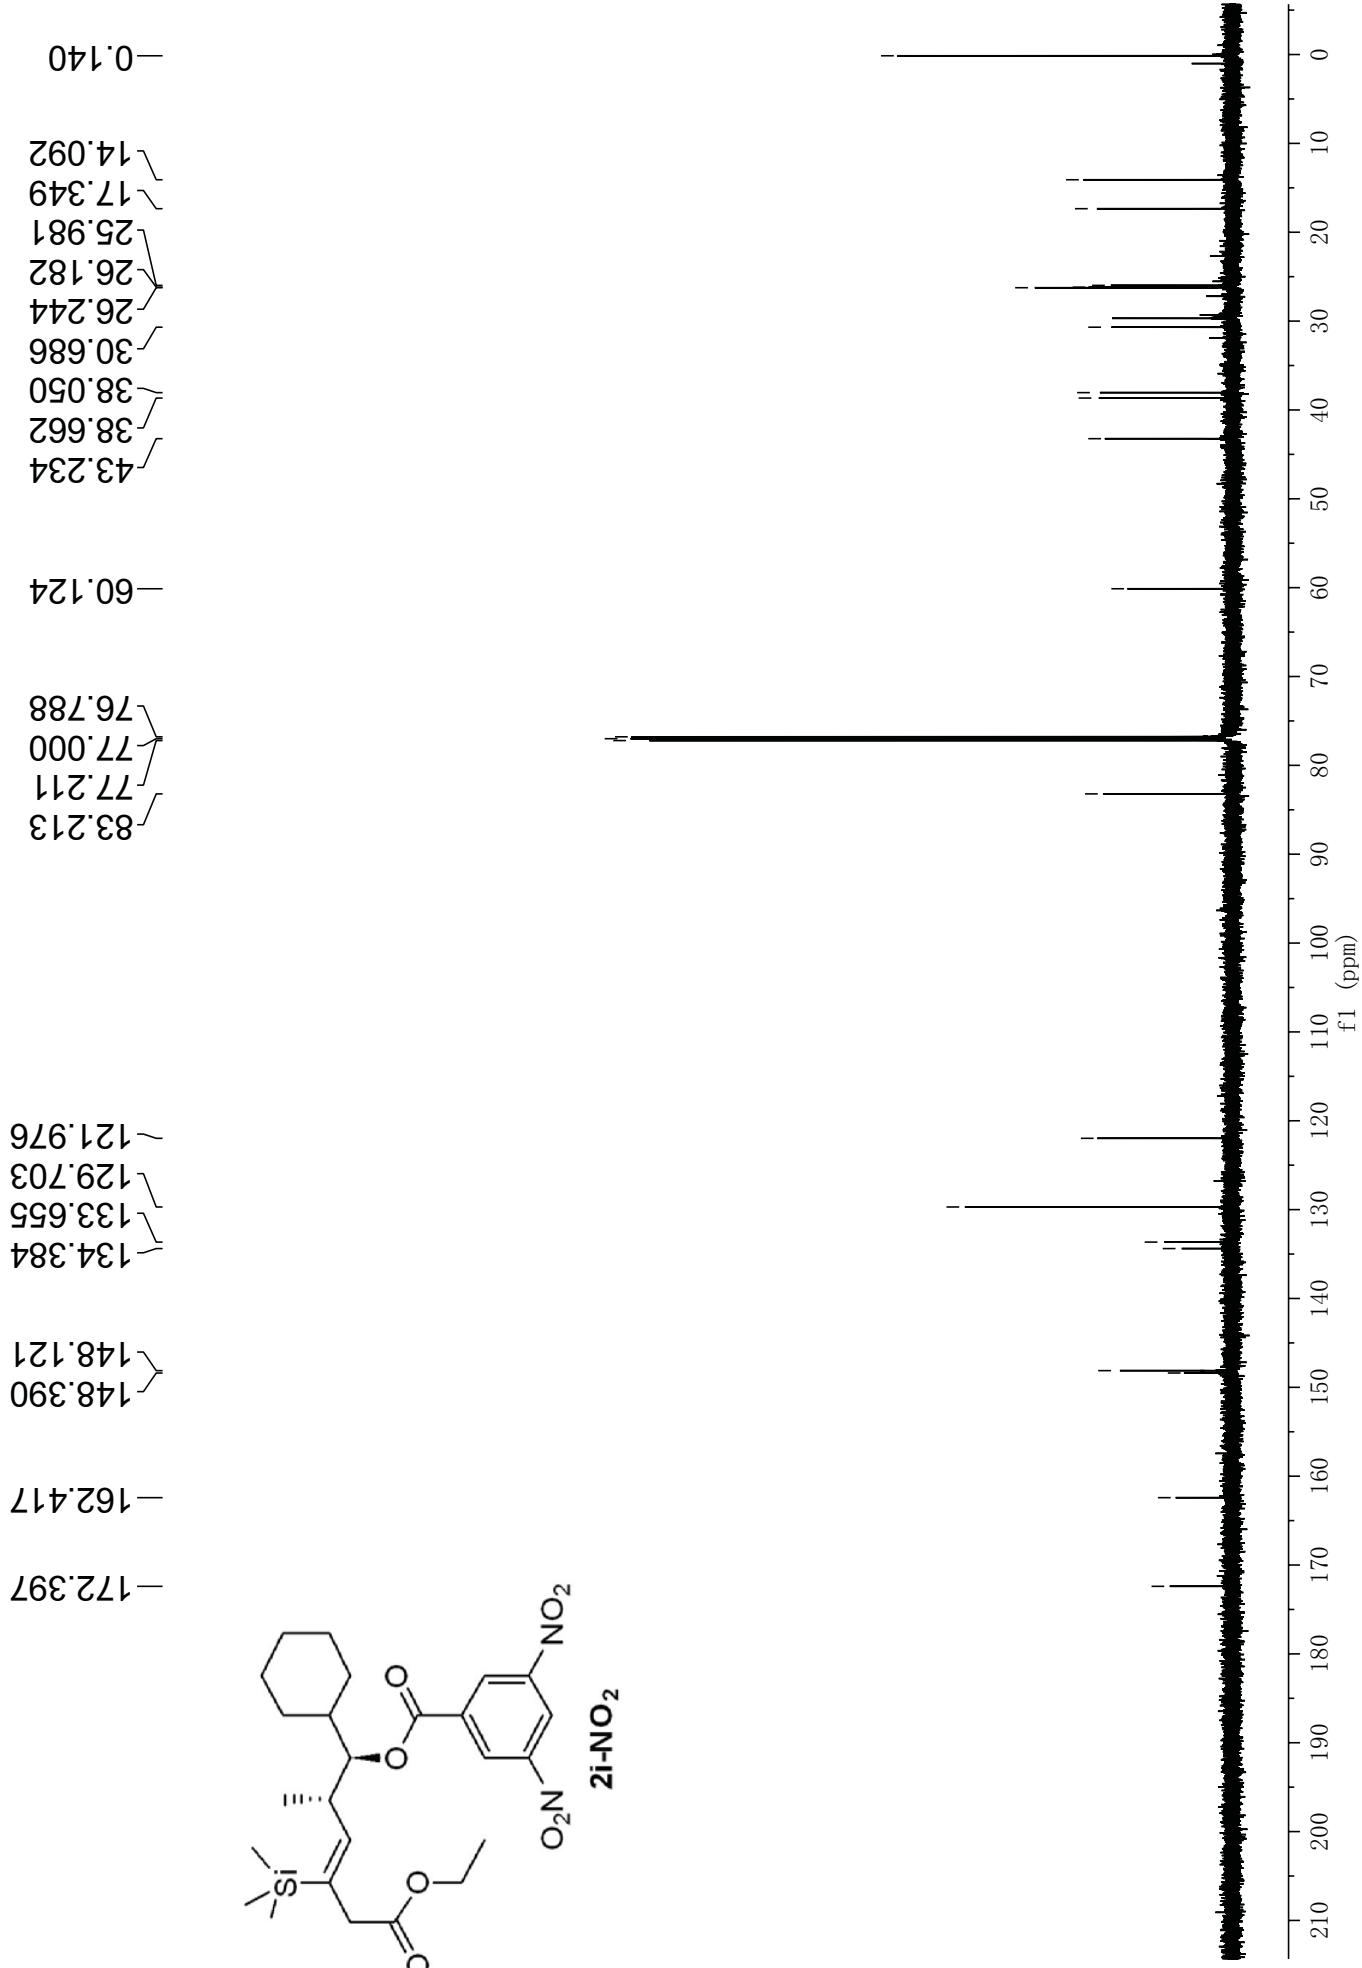

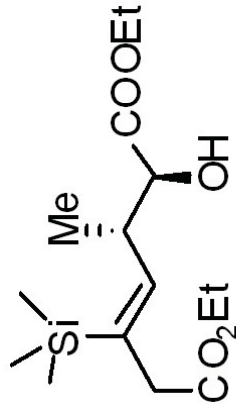

2j

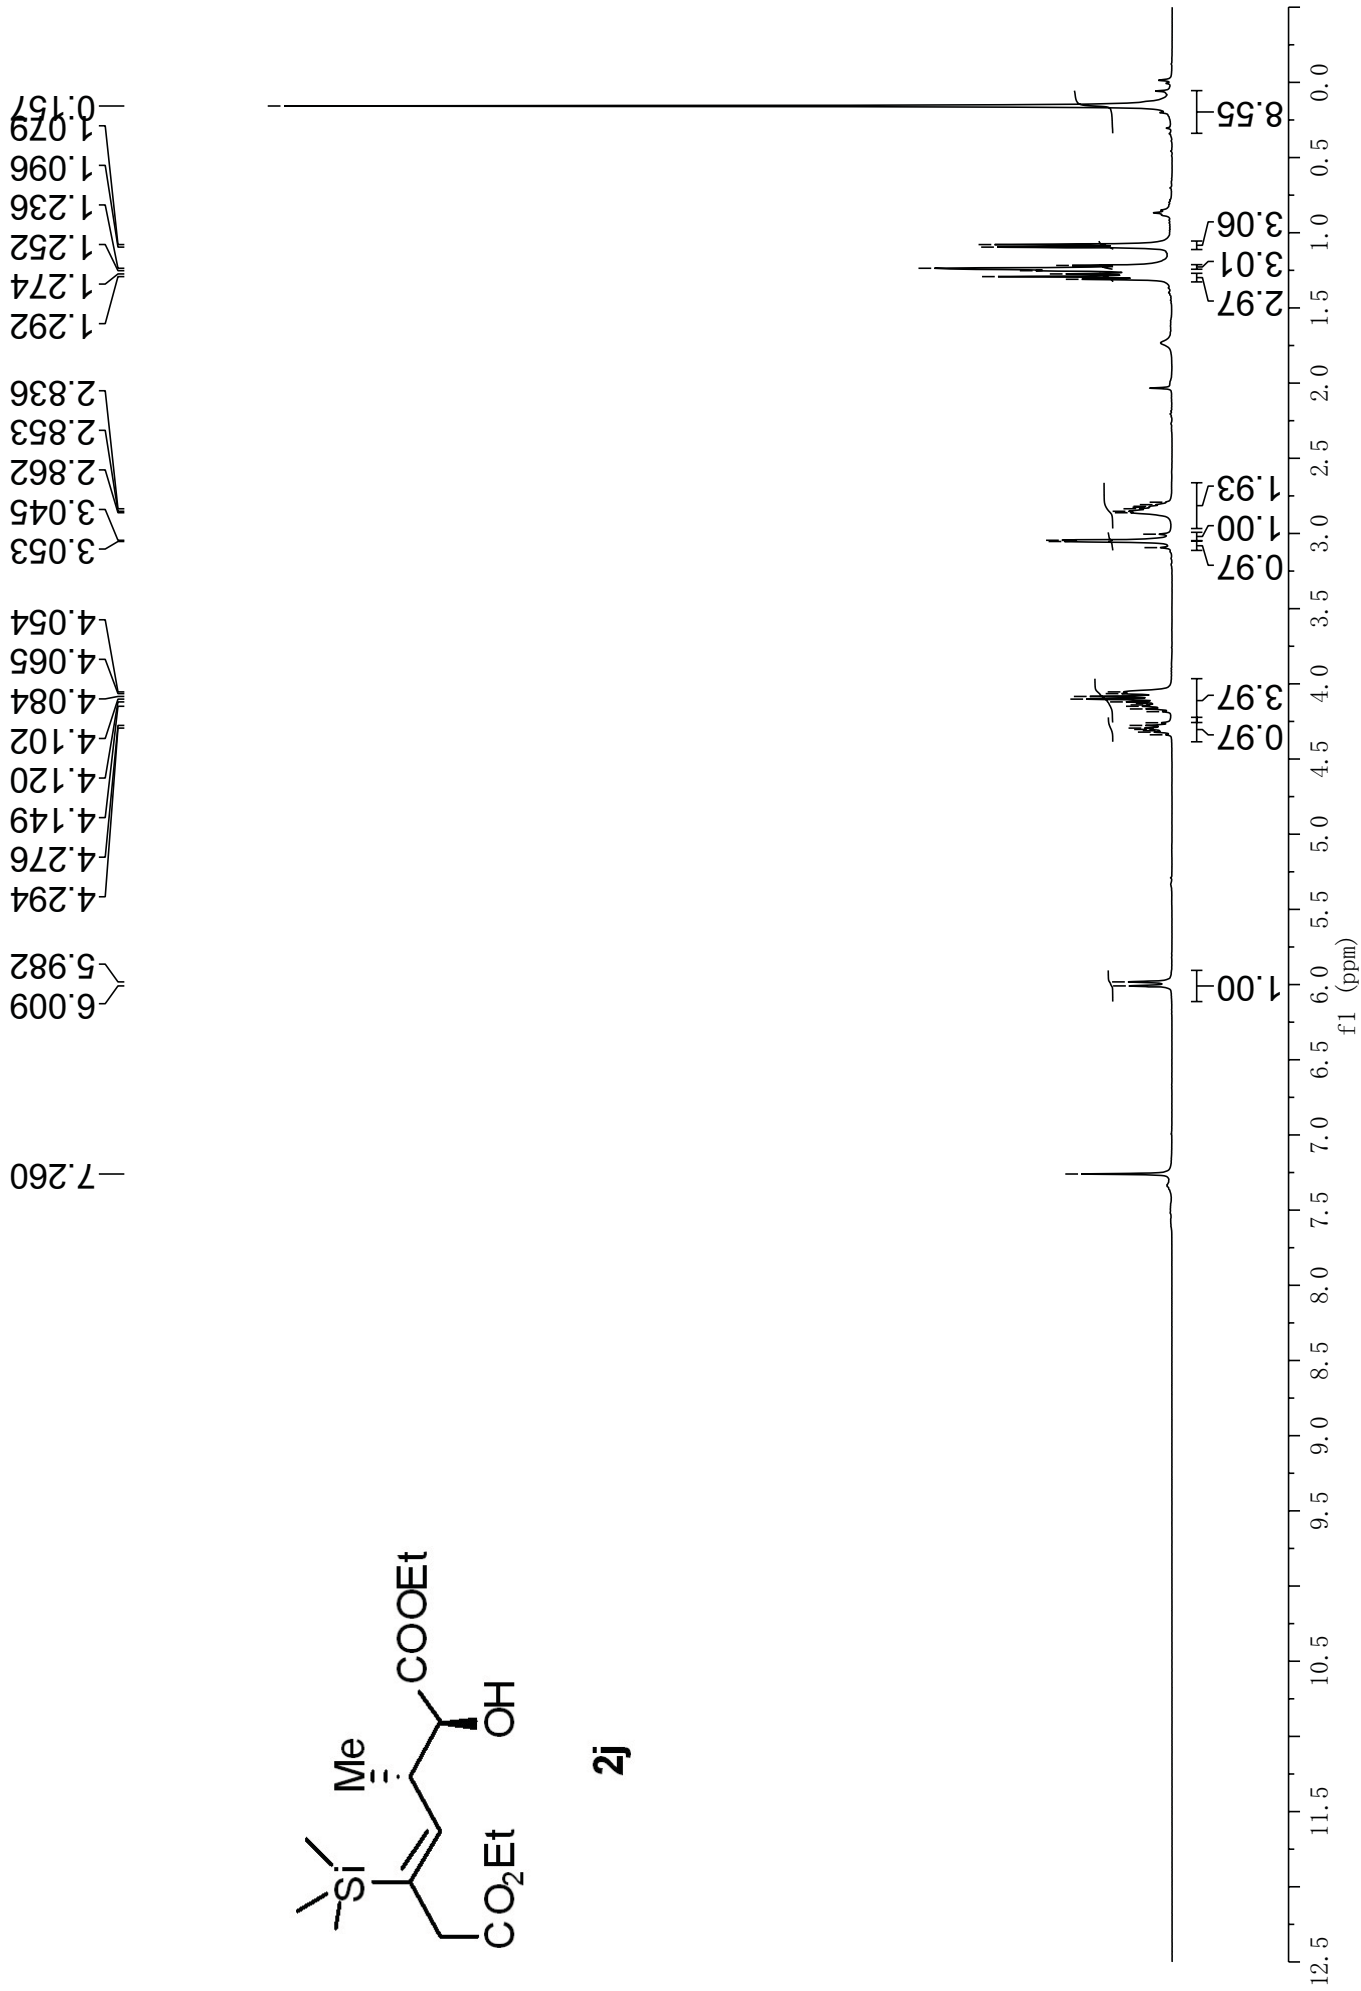

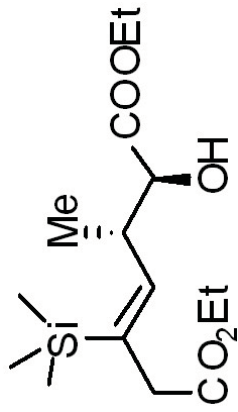

2j

173.895  
172.685  
145.552  
134.625  
77.211  
77.000  
76.788  
61.725  
60.421  
43.672  
40.079  
17.216  
14.178  
14.112  
0.109

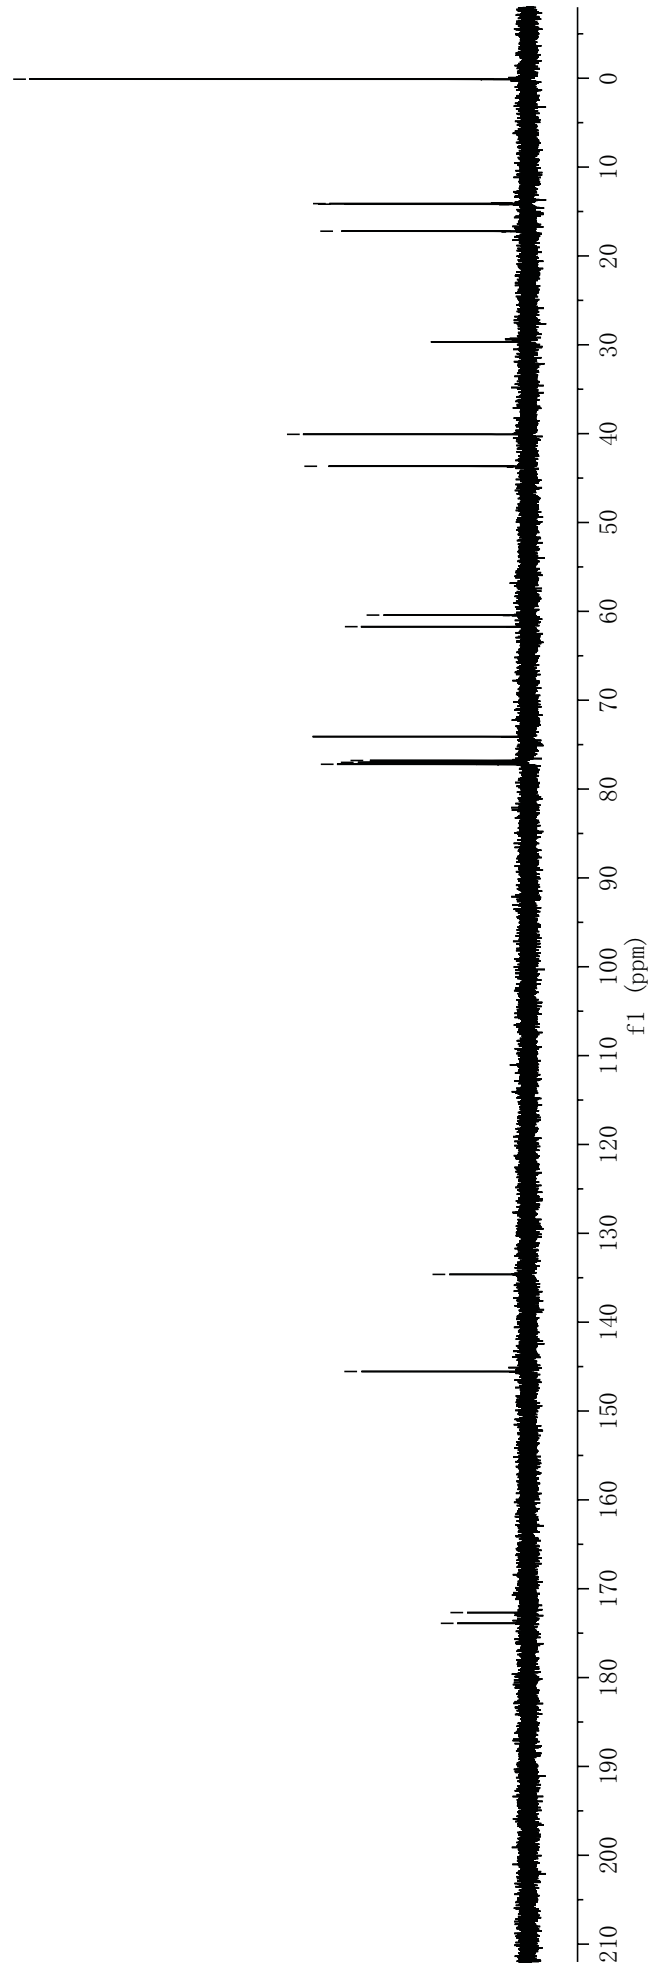

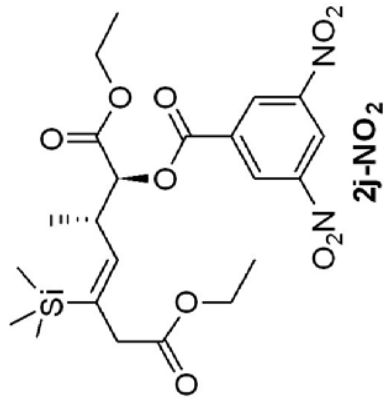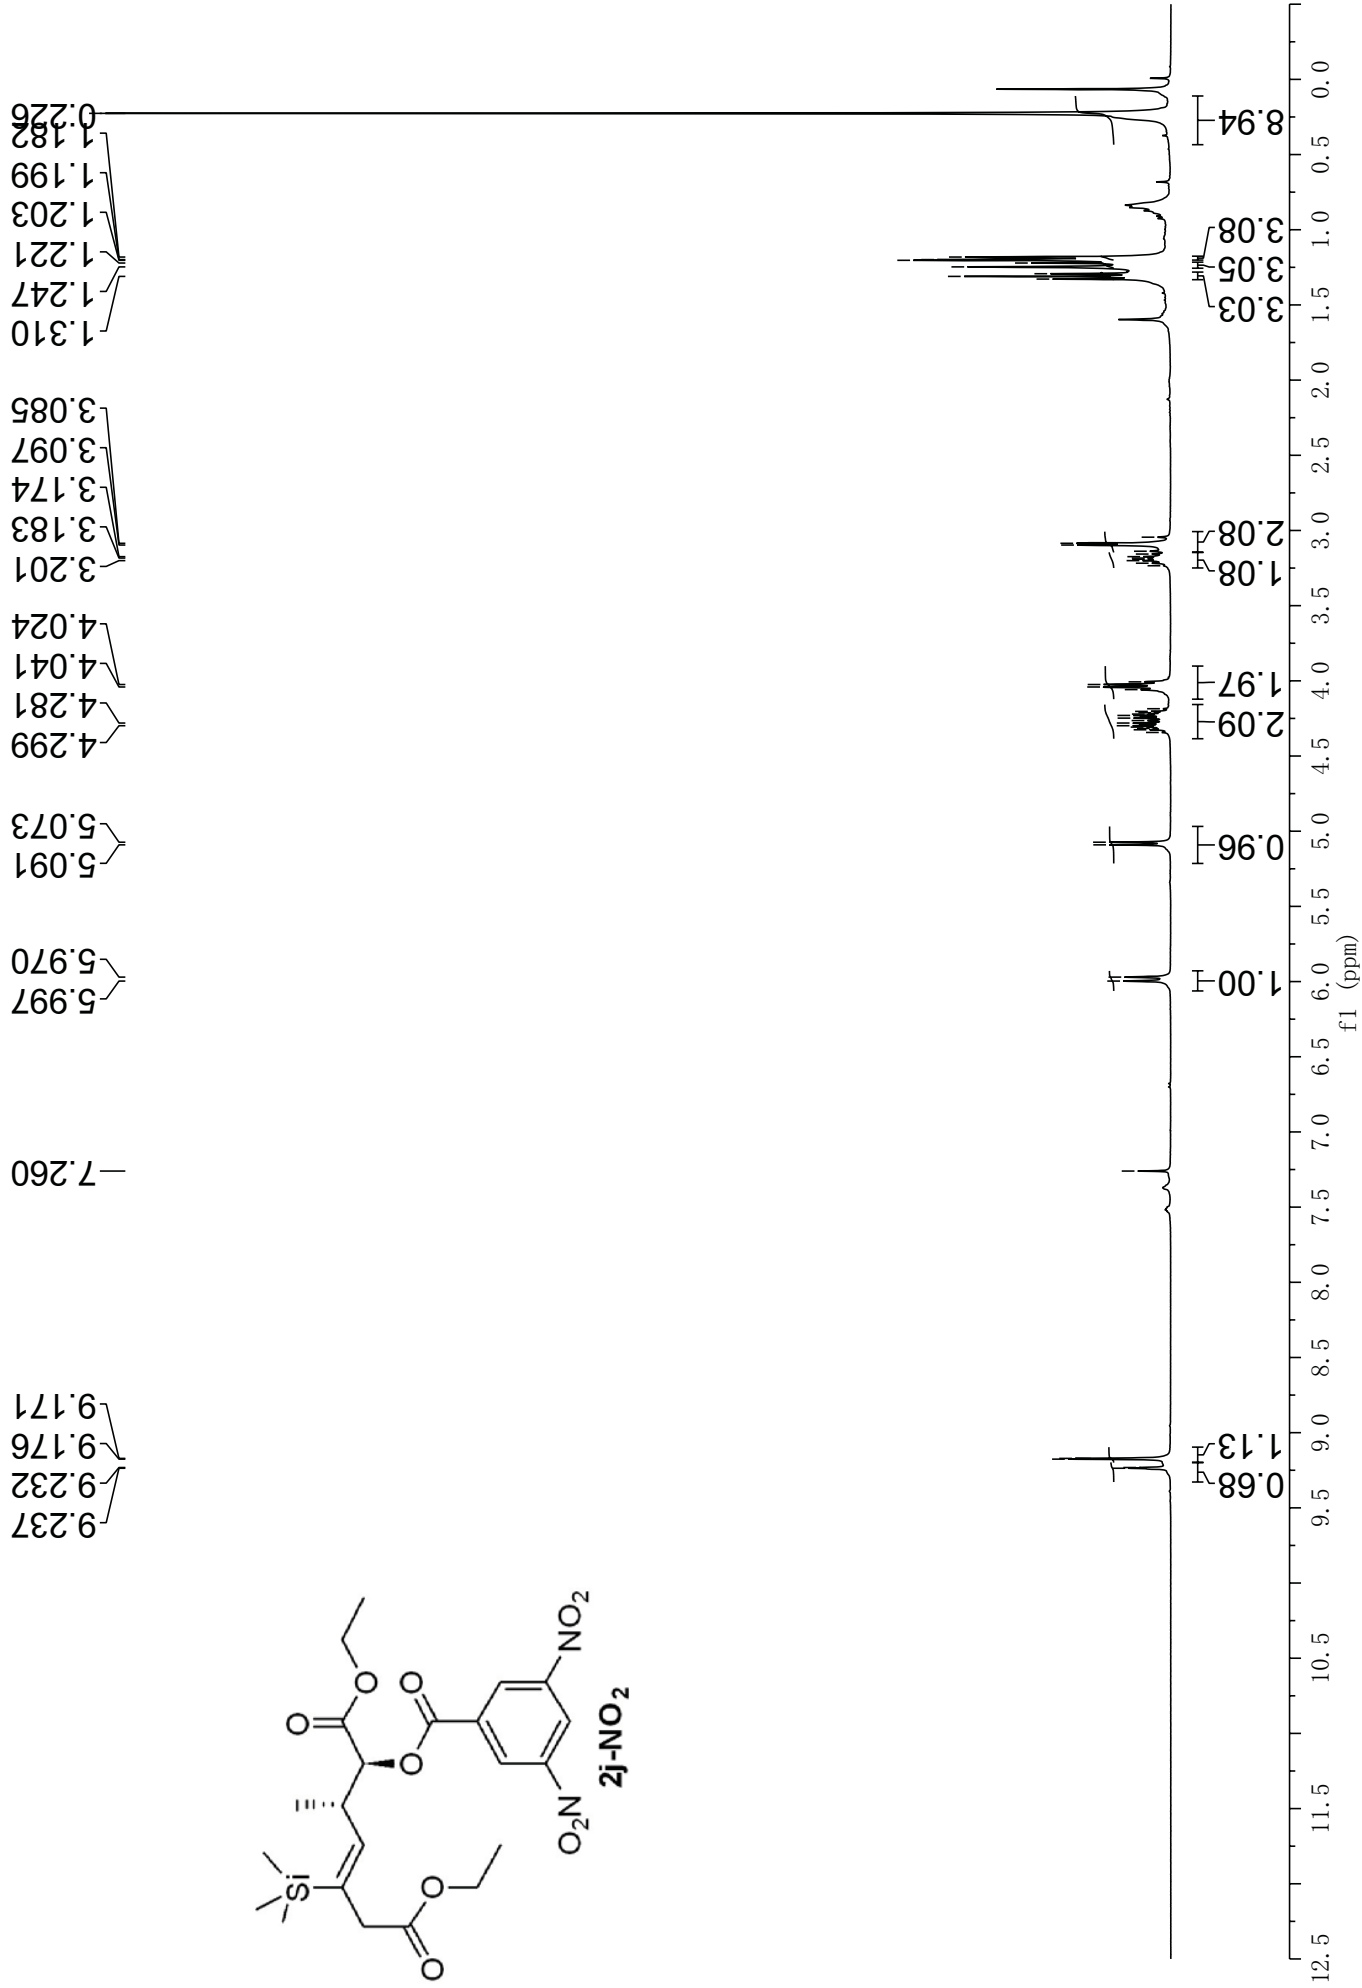

- ~ 175.102
- ~ 172.358
- ~ 168.270
- ~ 162.119
- ~ 148.641
- ~ 144.884
- ~ 135.843
- ~ 133.094
- ~ 129.759
- ~ 122.633

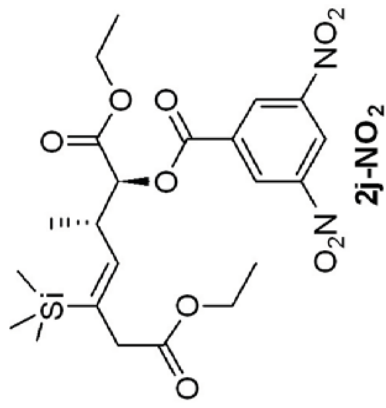

- ~ 77.856
- ~ 77.826
- ~ 77.317
- ~ 77.000
- ~ 76.682
- ~ 61.870
- ~ 60.446
- ~ 43.450
- ~ 38.171
- ~ 17.235
- ~ 14.108
- ~ 0.065

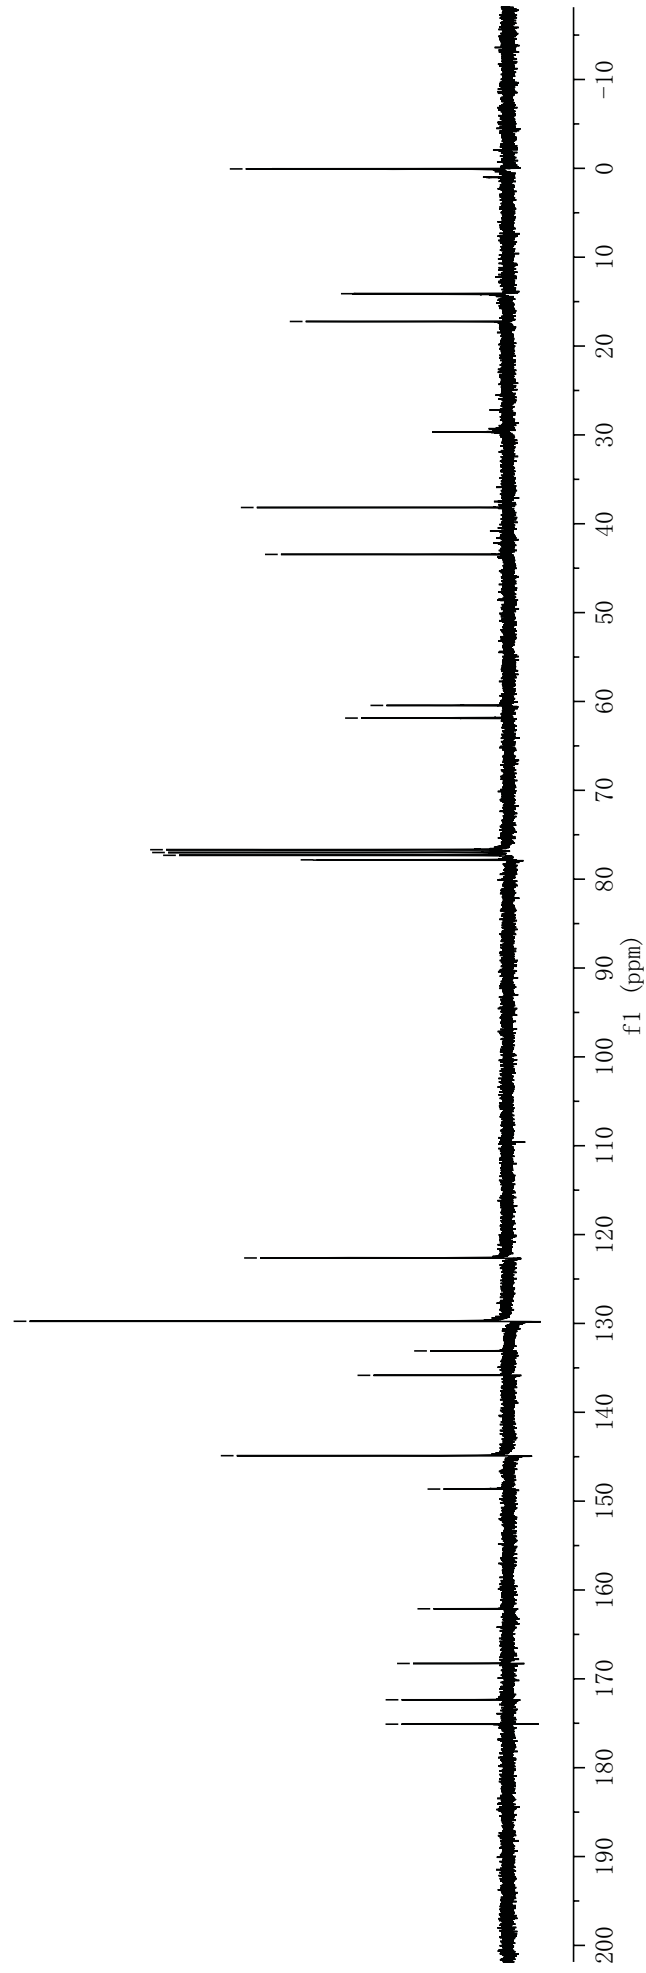

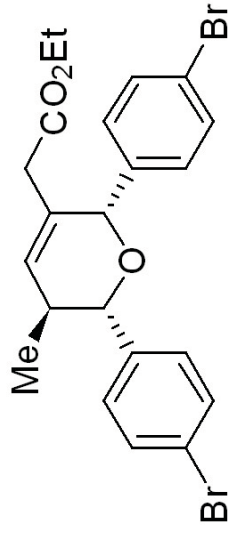

3a

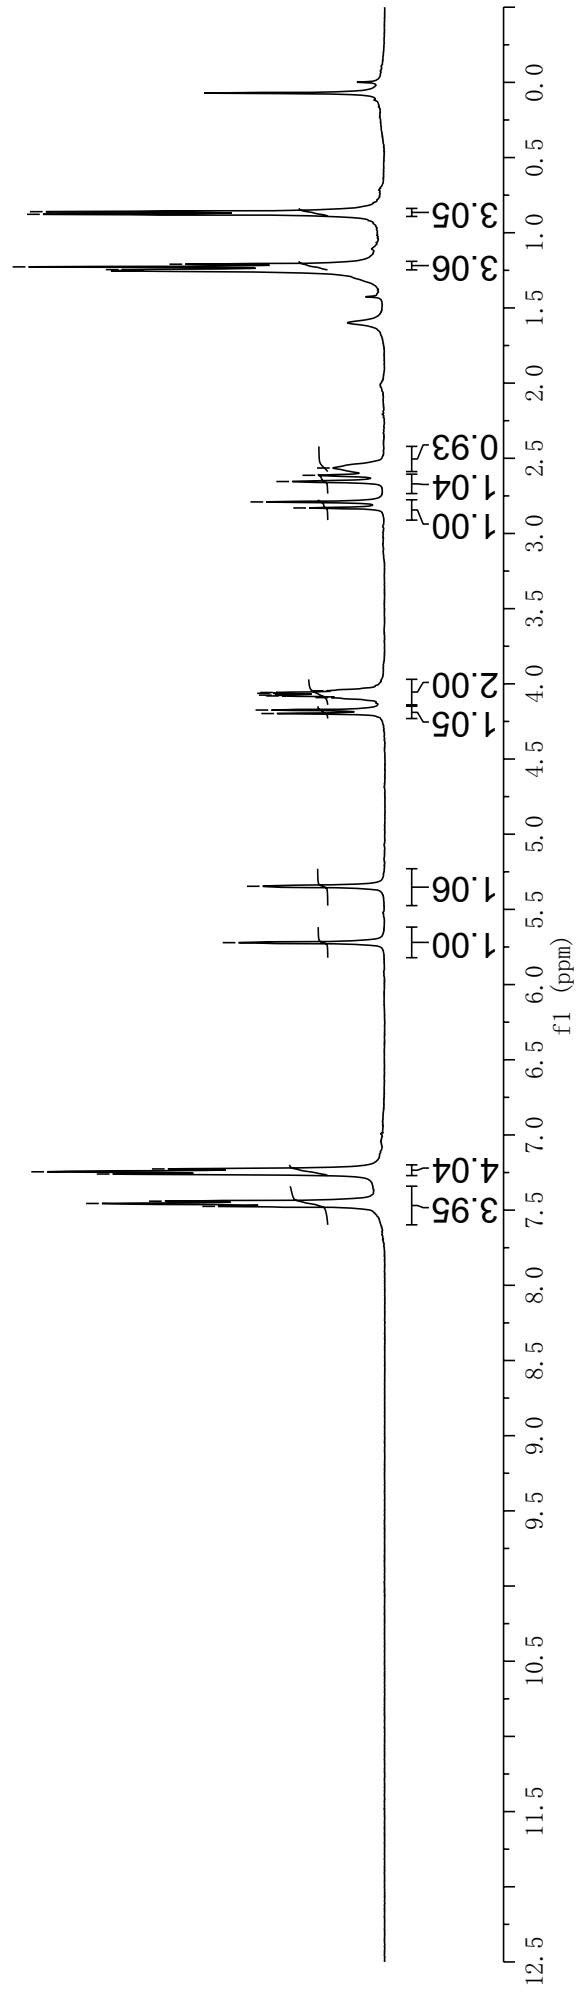

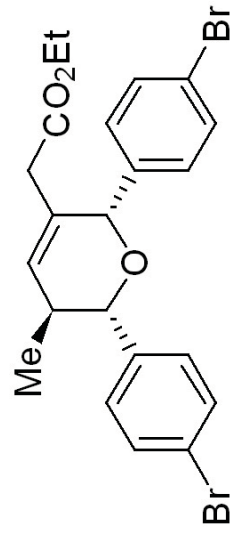

3a

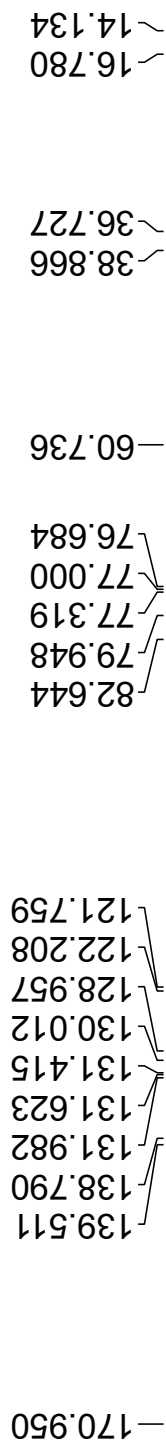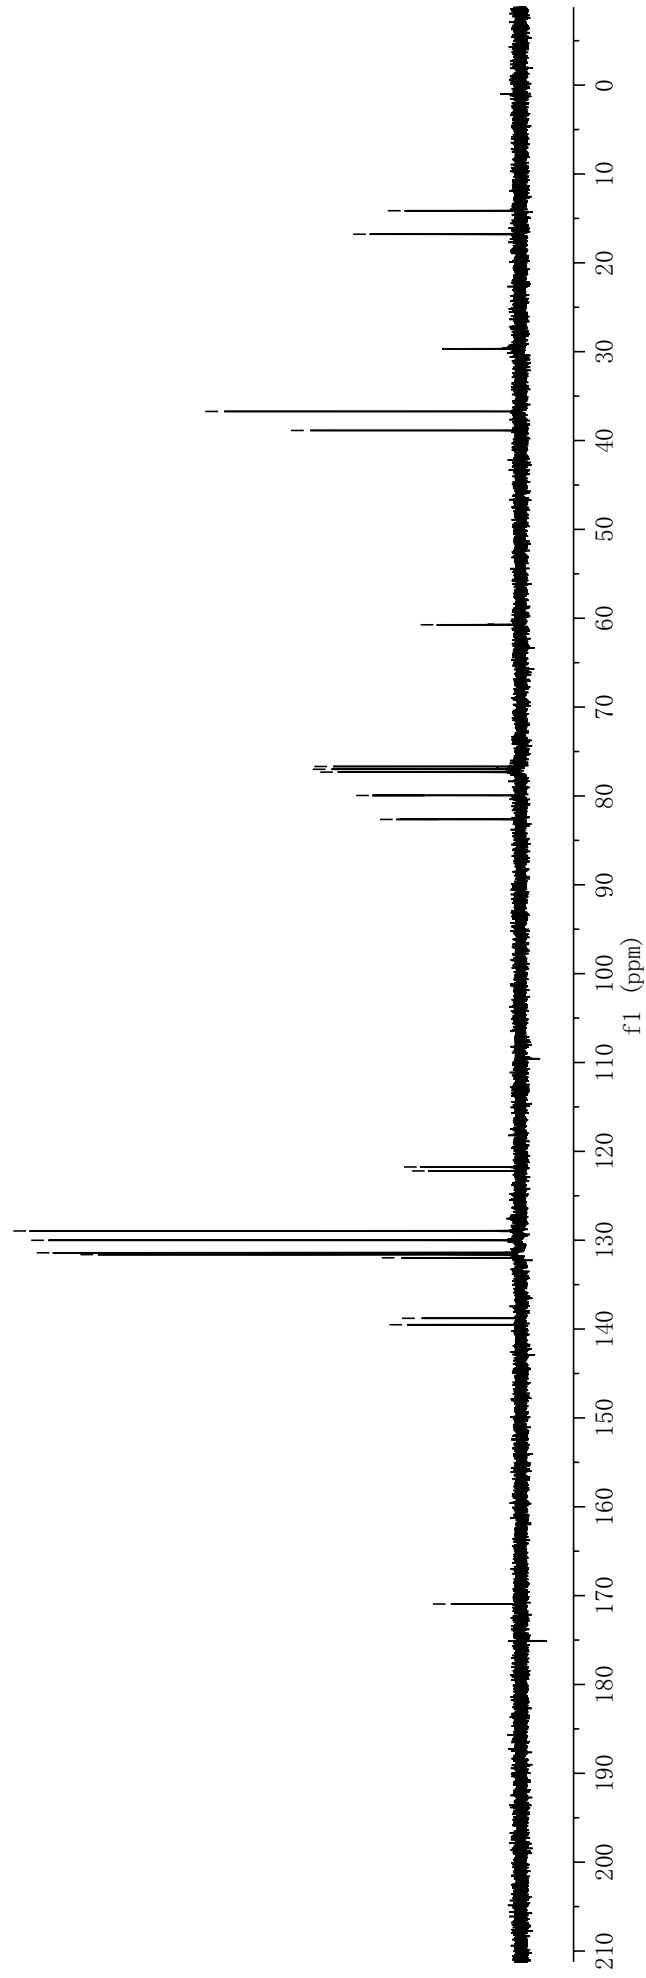

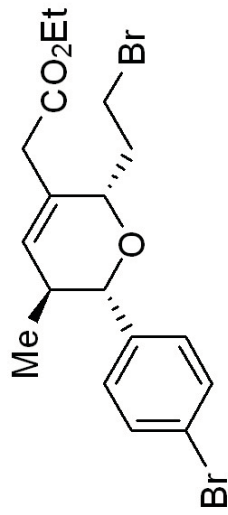

3b

7.477  
7.458  
7.260  
7.208  
7.189  
-5.616  
4.181  
4.164  
3.970  
3.947  
3.472  
3.455  
3.439  
3.426  
3.064  
3.026  
2.043  
1.926  
1.904  
1.904  
1.286  
1.269  
0.797  
0.780

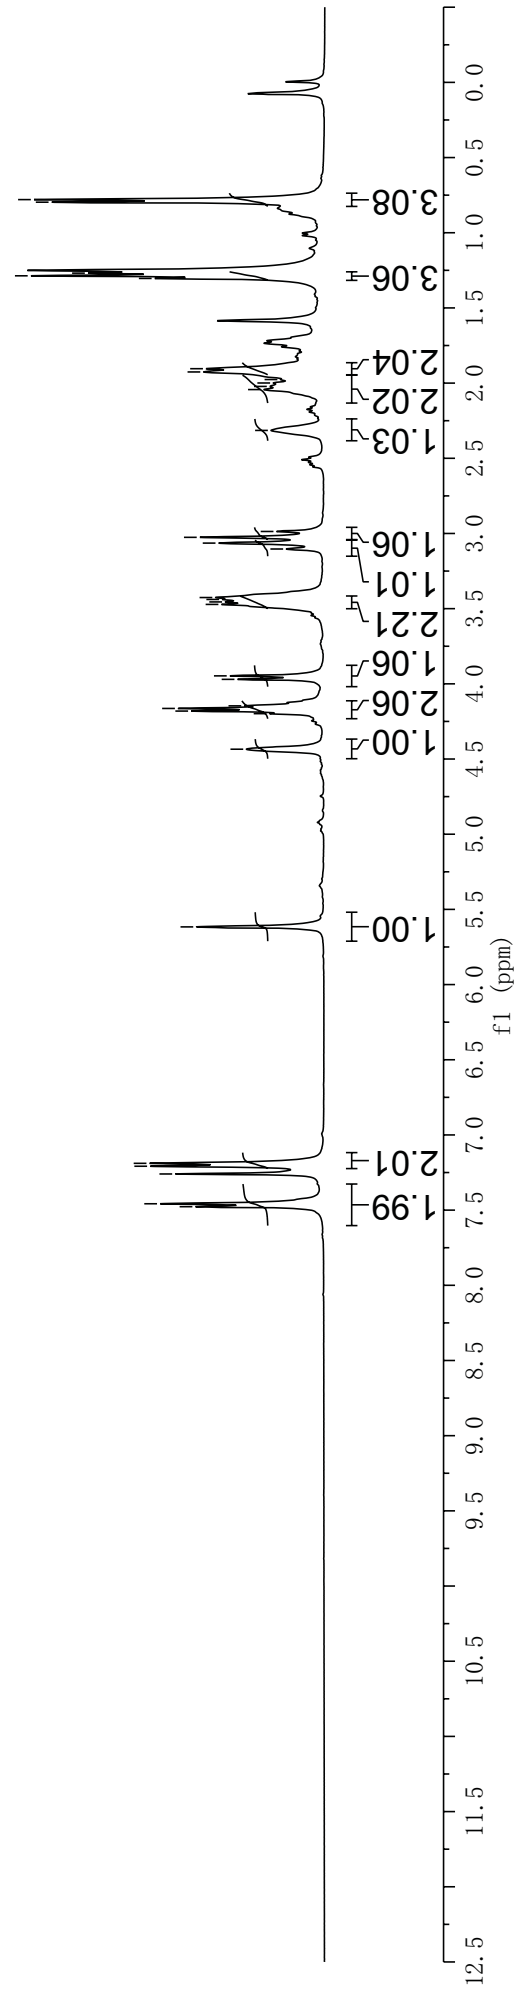



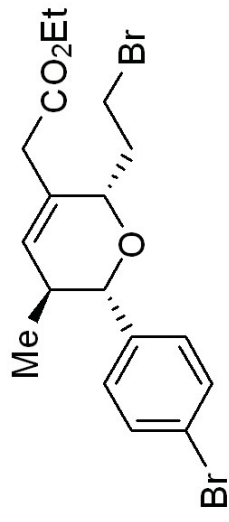

**3b**

|   |         |
|---|---------|
| ~ | 14.213  |
| ~ | 16.691  |
| ~ | 27.687  |
| ~ | 31.025  |
| ~ | 34.318  |
| ~ | 36.806  |
| ~ | 38.737  |
| — | 60.851  |
| ~ | 75.627  |
| ~ | 76.788  |
| ~ | 77.000  |
| ~ | 77.211  |
| ~ | 82.022  |
| ~ | 121.590 |
| ~ | 128.855 |
| ~ | 131.343 |
| ~ | 131.816 |
| ~ | 131.918 |
| ~ | 140.142 |
| — | 171.061 |

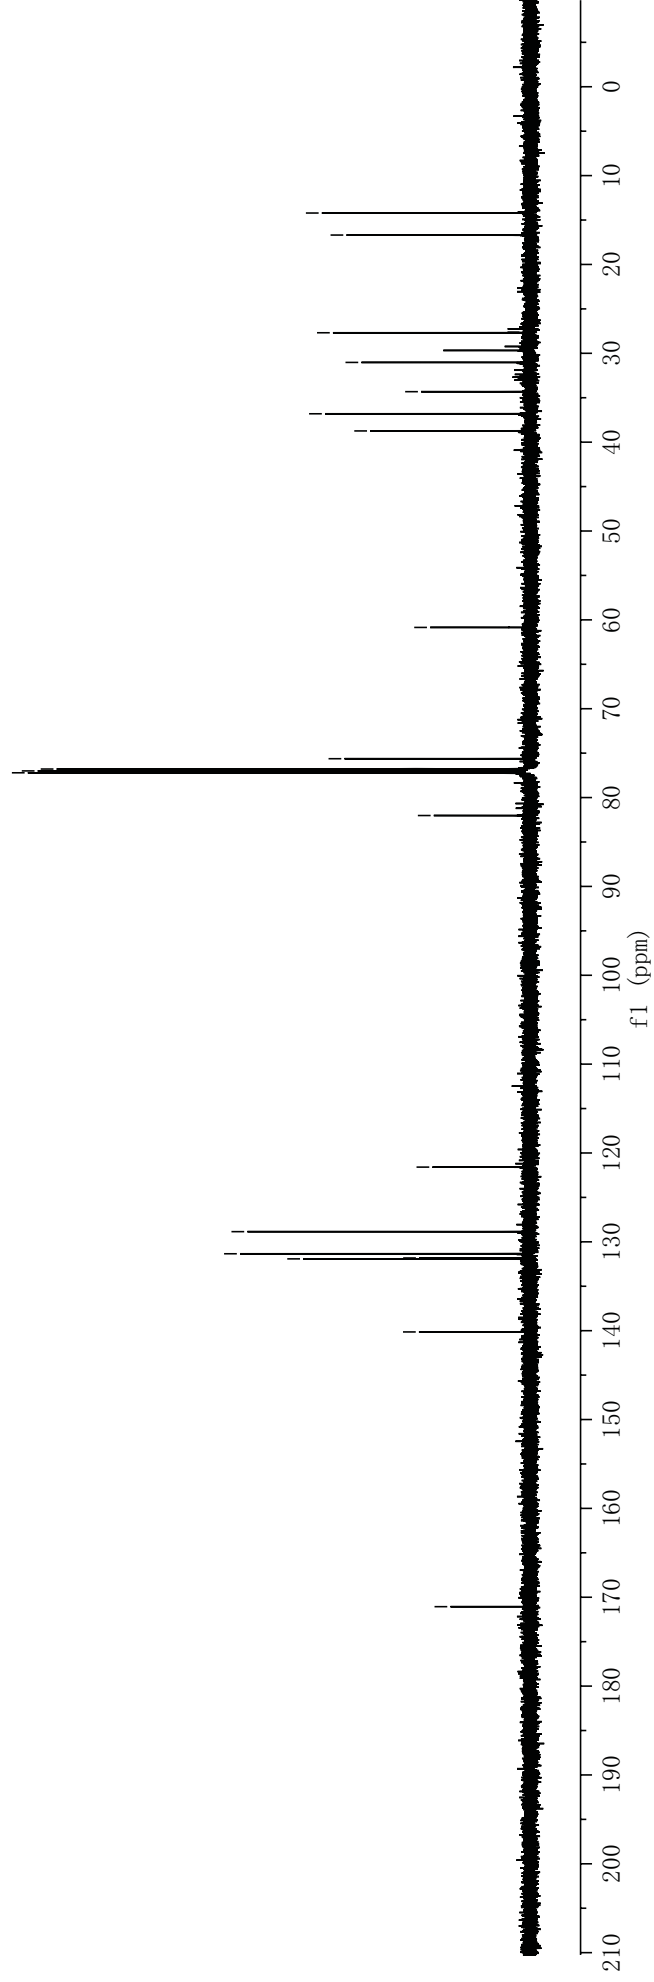

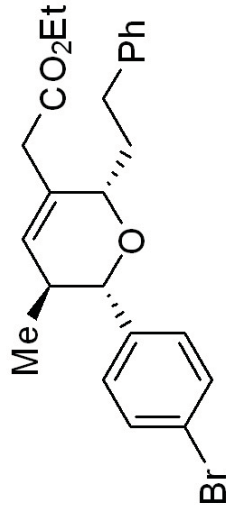

3c

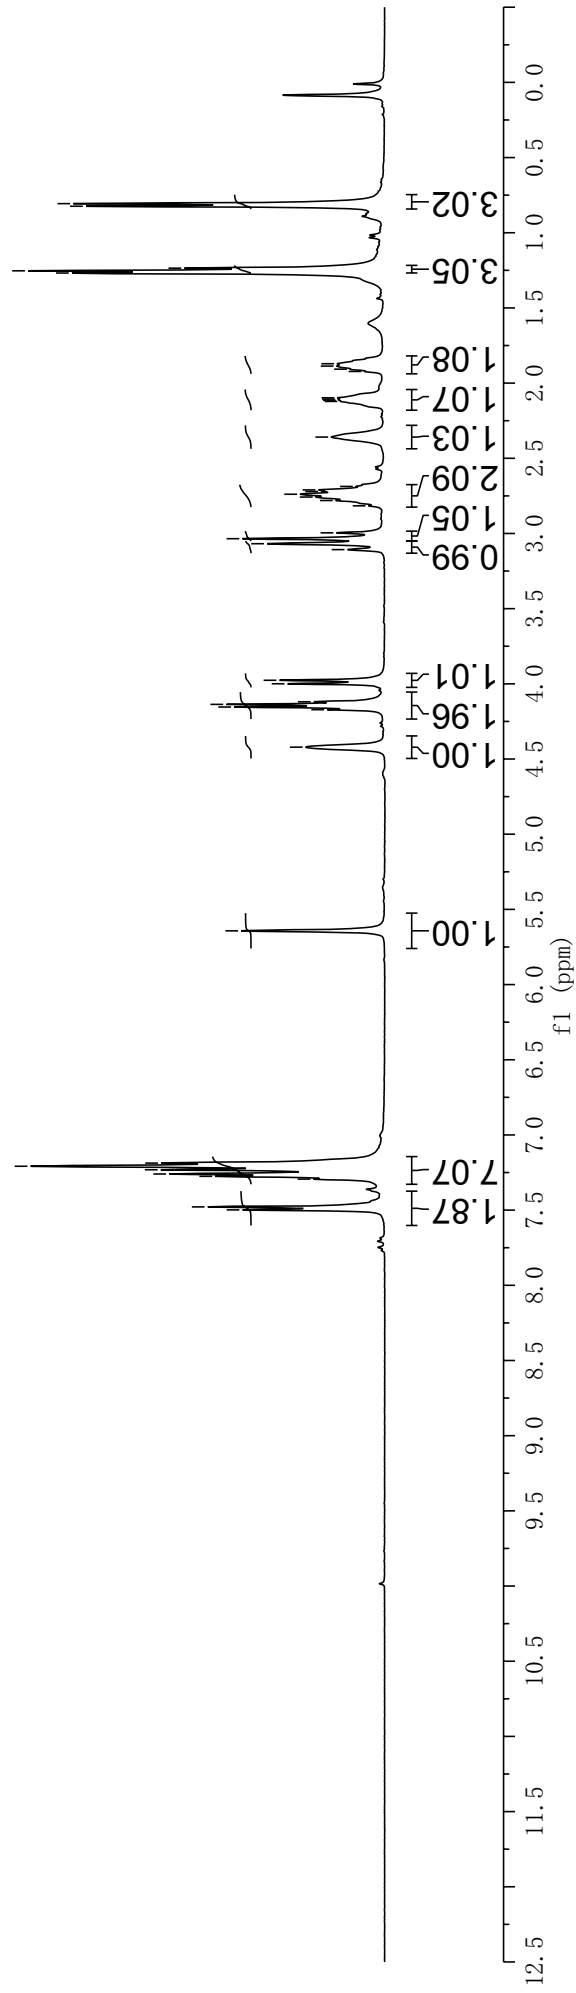

7.498  
7.479  
7.294  
7.275  
7.260  
7.232  
7.208  
7.187  
-5.643  
4.421  
4.172  
4.154  
4.137  
4.119  
4.000  
3.976  
3.068  
3.035  
2.758  
2.739  
2.721  
2.710  
2.359  
1.253  
1.236  
0.824  
0.806

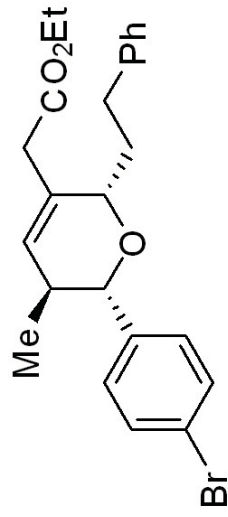

3c

171.084  
 142.353  
 140.355  
 132.134  
 131.724  
 131.301  
 128.914  
 128.476  
 128.266  
 125.651  
 121.516  
 81.963  
 77.212  
 77.000  
 76.788  
 75.738  
 60.773  
 38.831  
 36.880  
 34.309  
 30.469  
 16.747  
 14.163

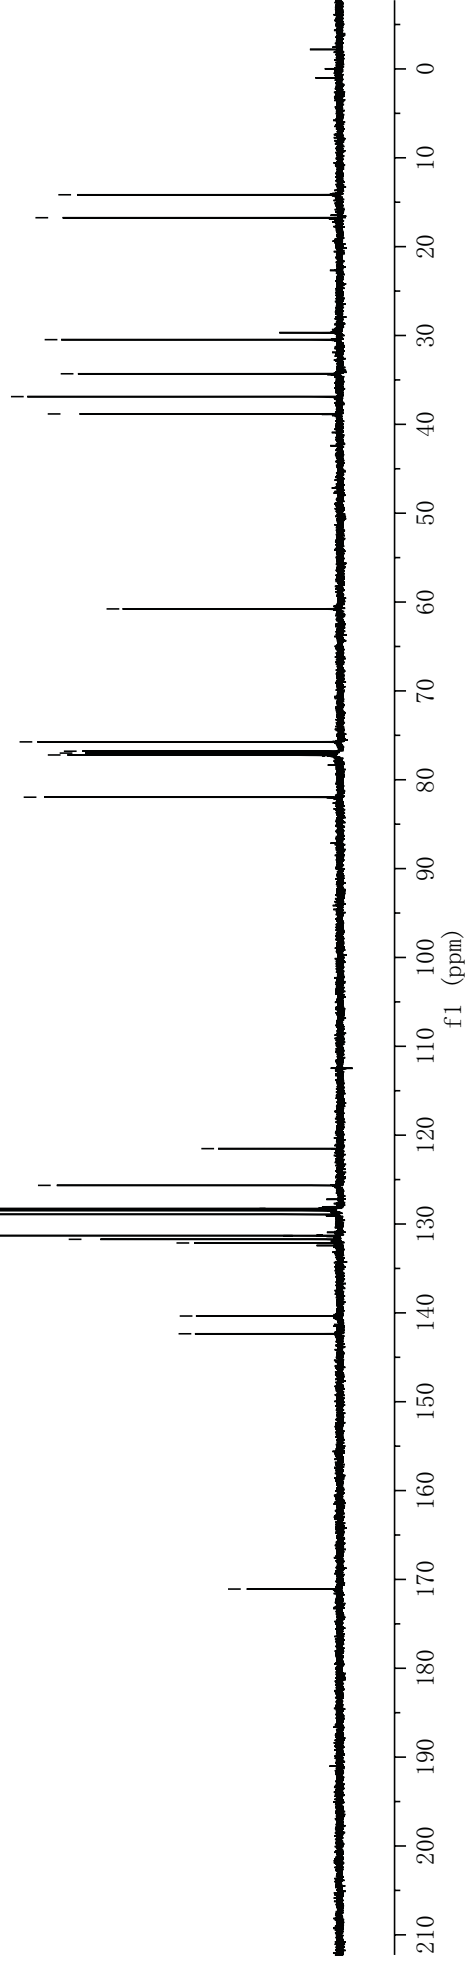

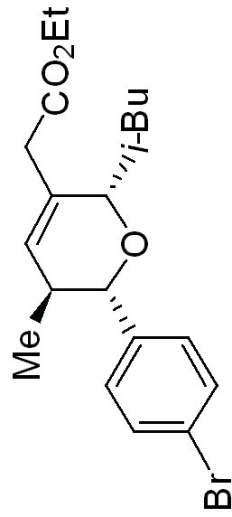

3d

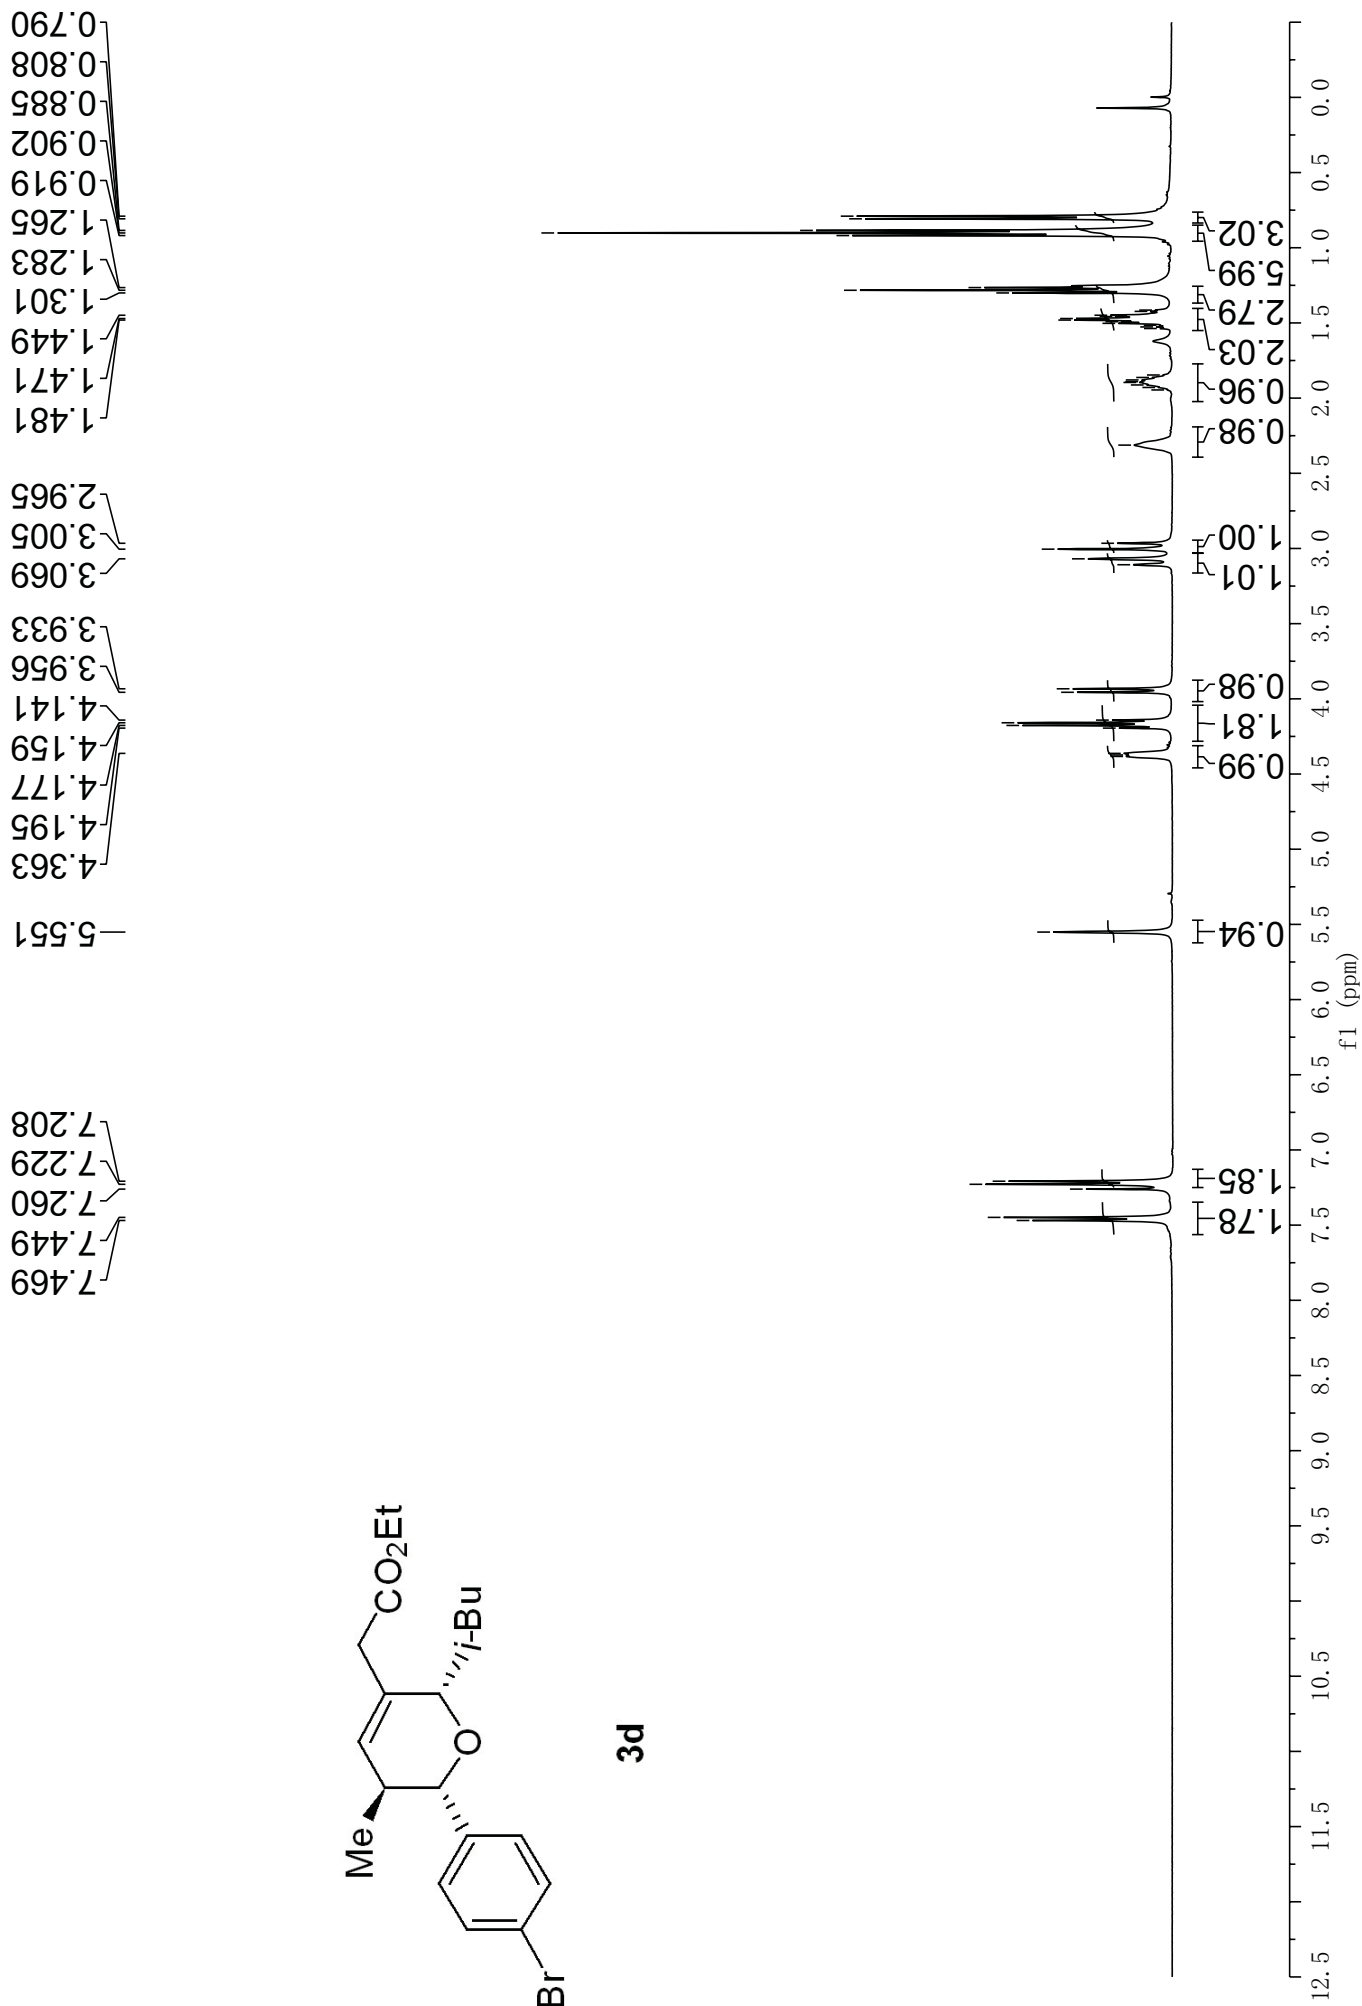

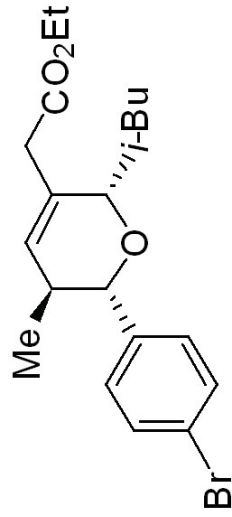

3d

- 171.237
- 140.539
- 133.229
- 131.163
- 130.823
- 128.878
- 121.292
- 82.040
- 77.318
- 77.000
- 76.685
- 75.022
- 60.692
- 41.824
- 38.928
- 36.906
- 24.052
- 24.012
- 21.708
- 16.806
- 14.195

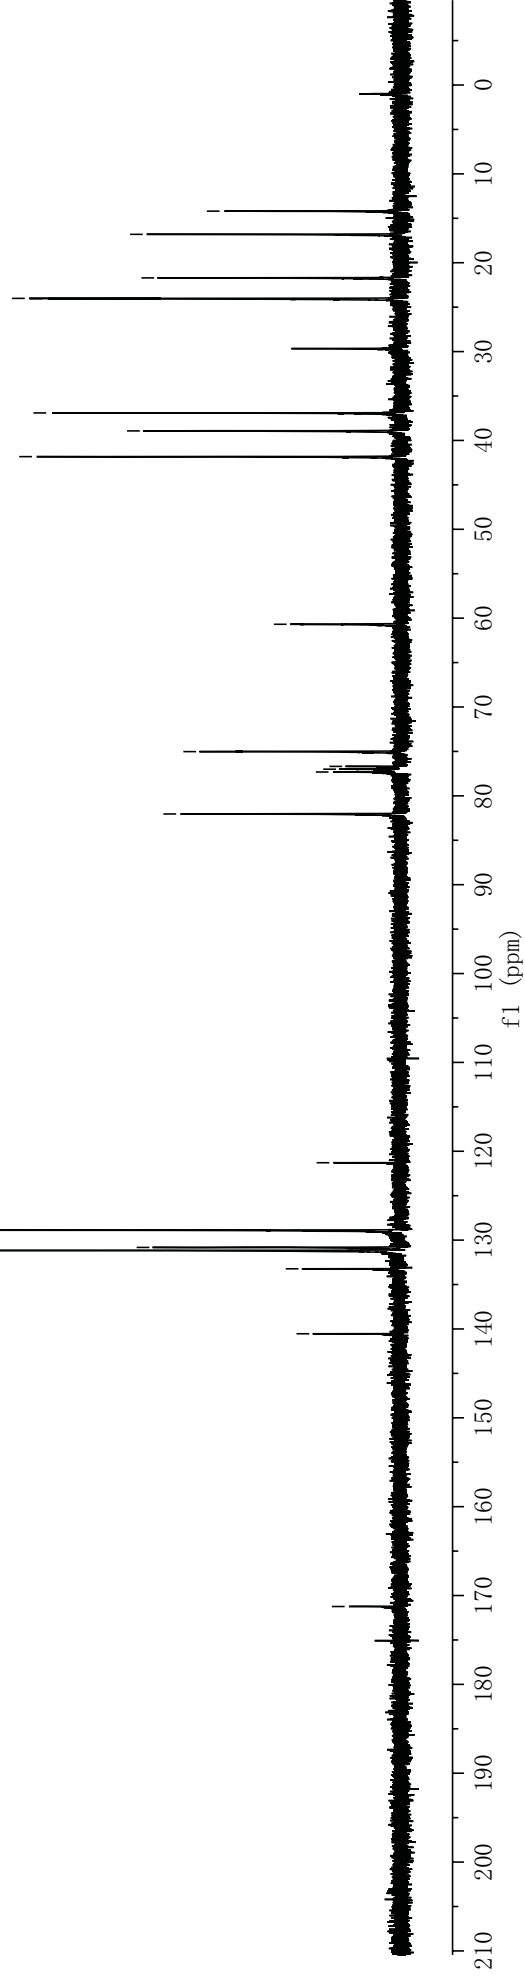

CHU-8-18F2PB NOESY1D 2.31 CDCI3 600MHZ

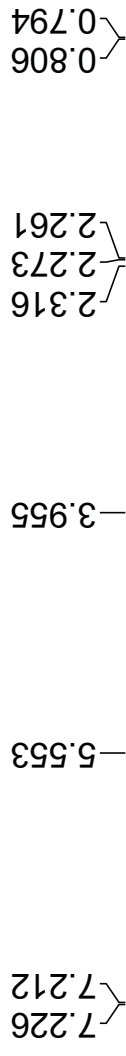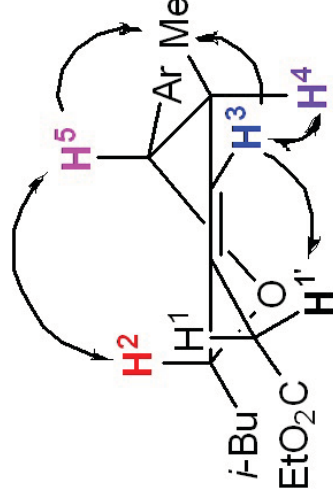

**3d** (Ar = C<sub>6</sub>H<sub>4</sub>-p-Br)

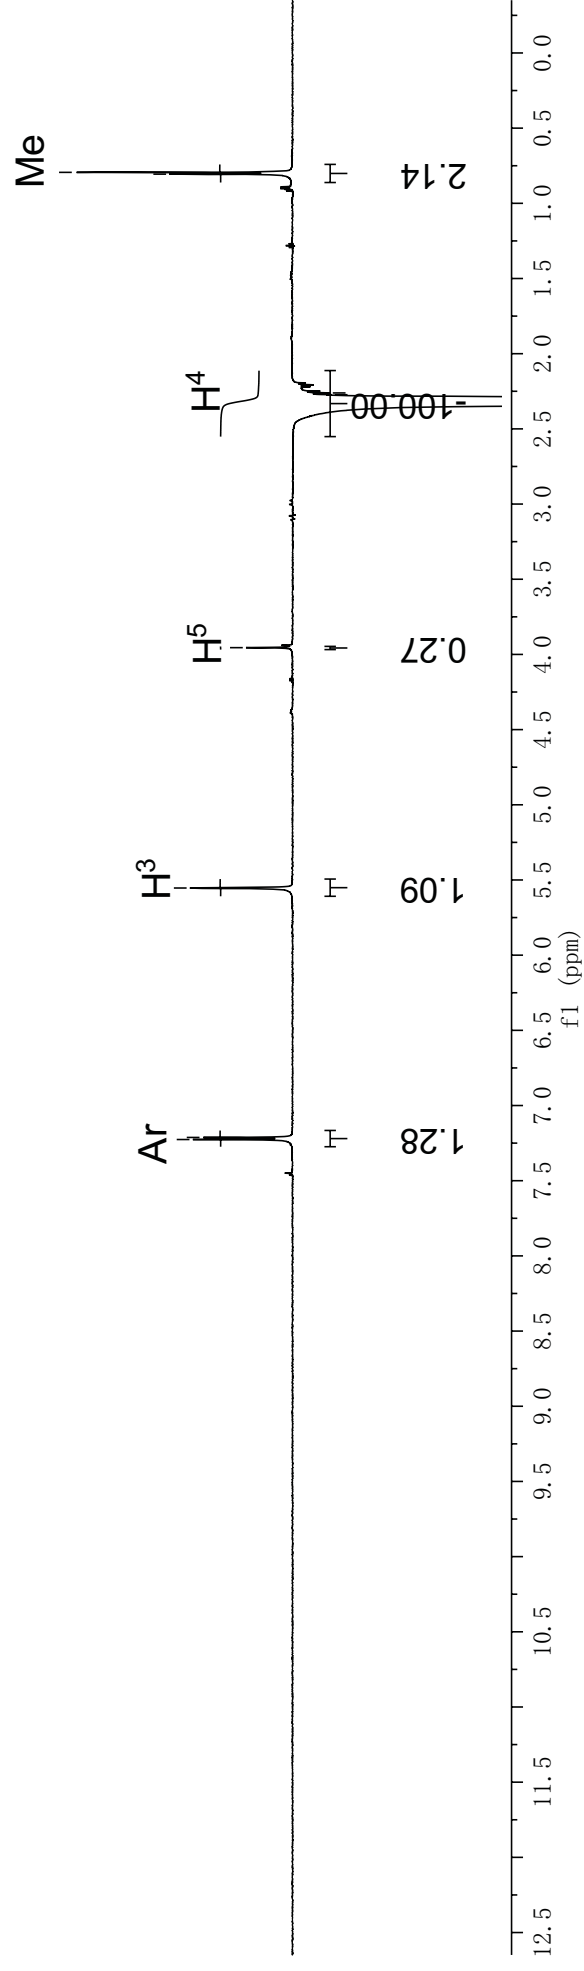

CHU-8-18F2PB NOESY1D 3.95 CDCI3 600MHZ

7.226  
7.212

5.553

4.385  
4.378  
4.371  
3.955  
3.939  
3.901

2.313

0.806  
0.794

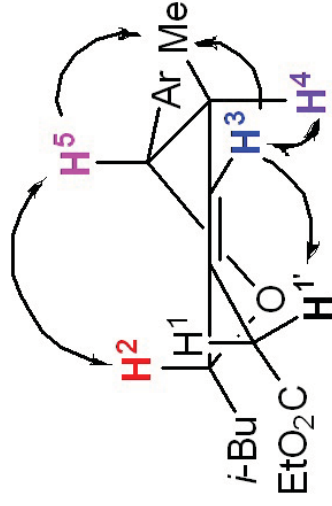

**3d** (Ar = C<sub>6</sub>H<sub>4</sub>-p-Br)

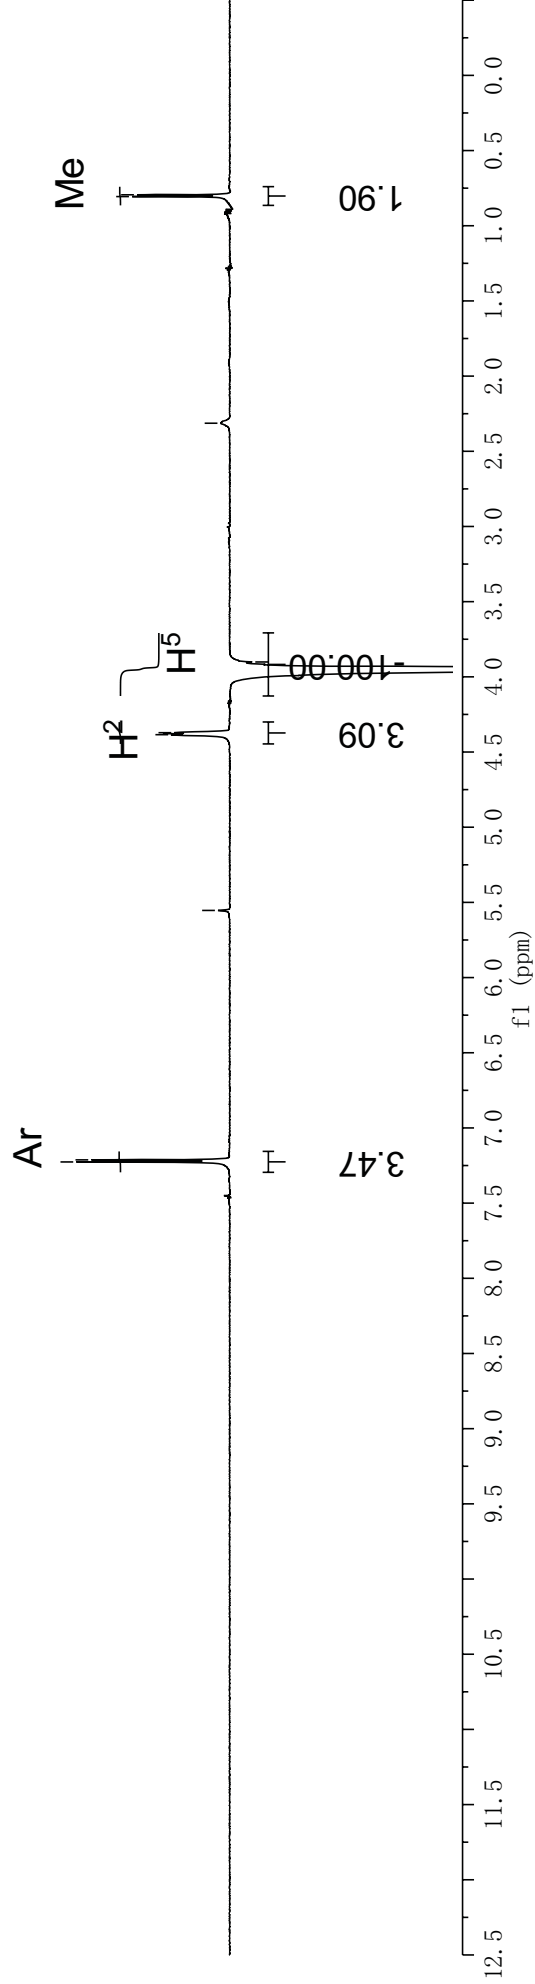

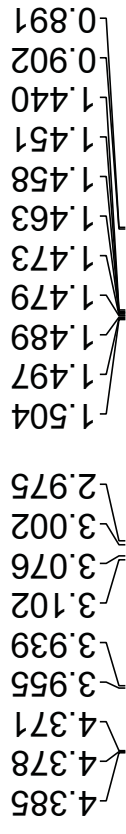

**3d** (Ar = C<sub>6</sub>H<sub>4</sub>-p-Br)

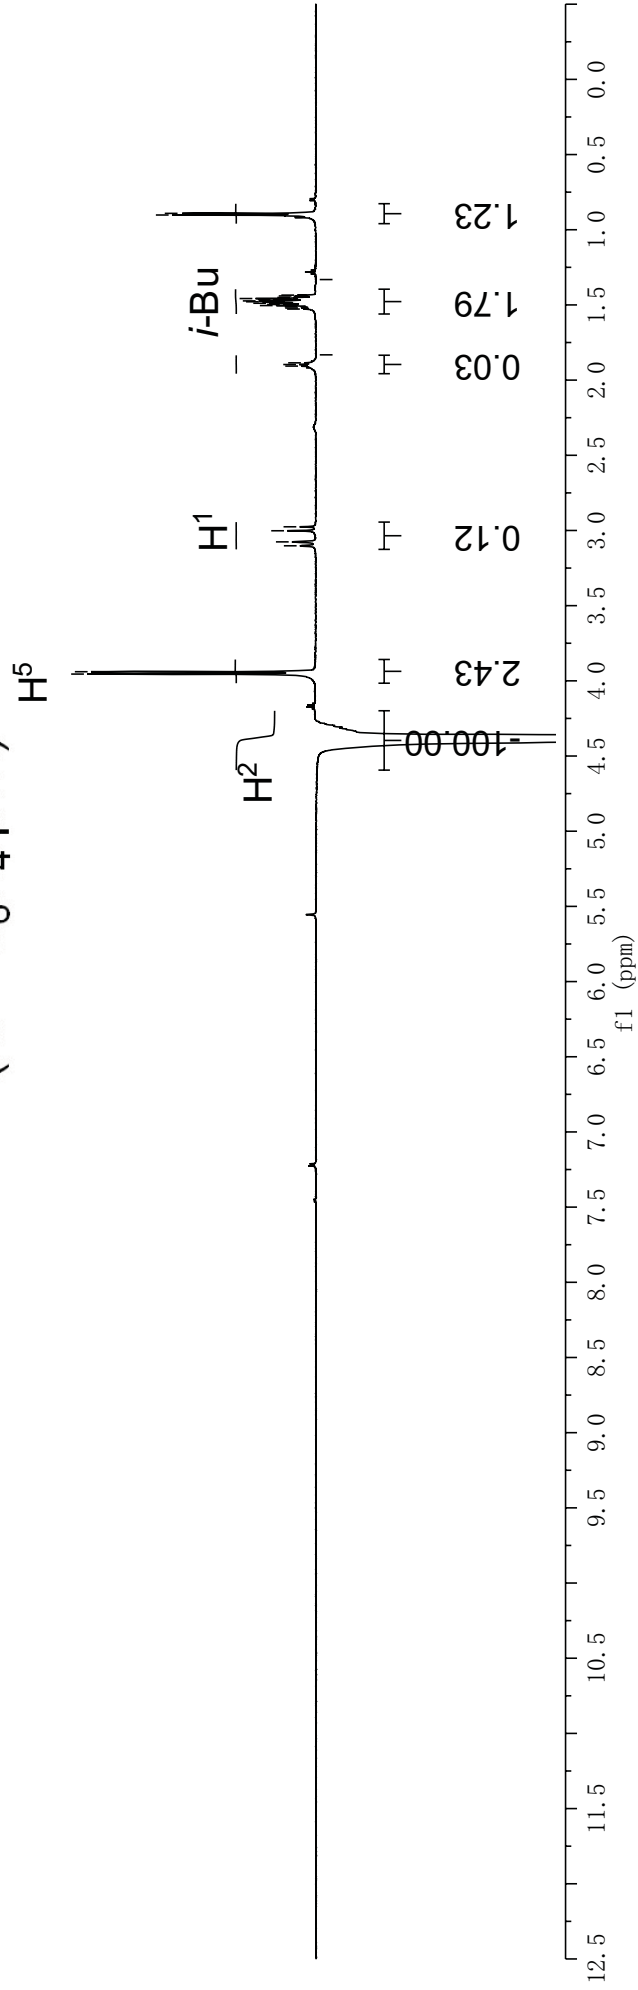



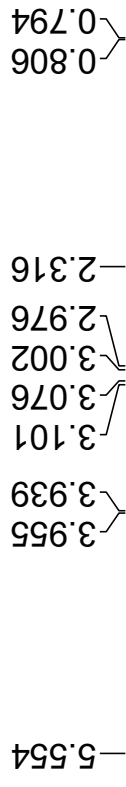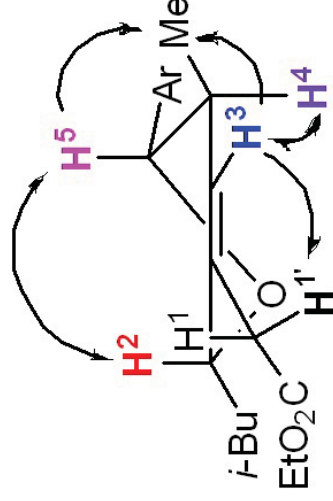

3d (Ar = C<sub>6</sub>H<sub>4</sub>-p-Br)

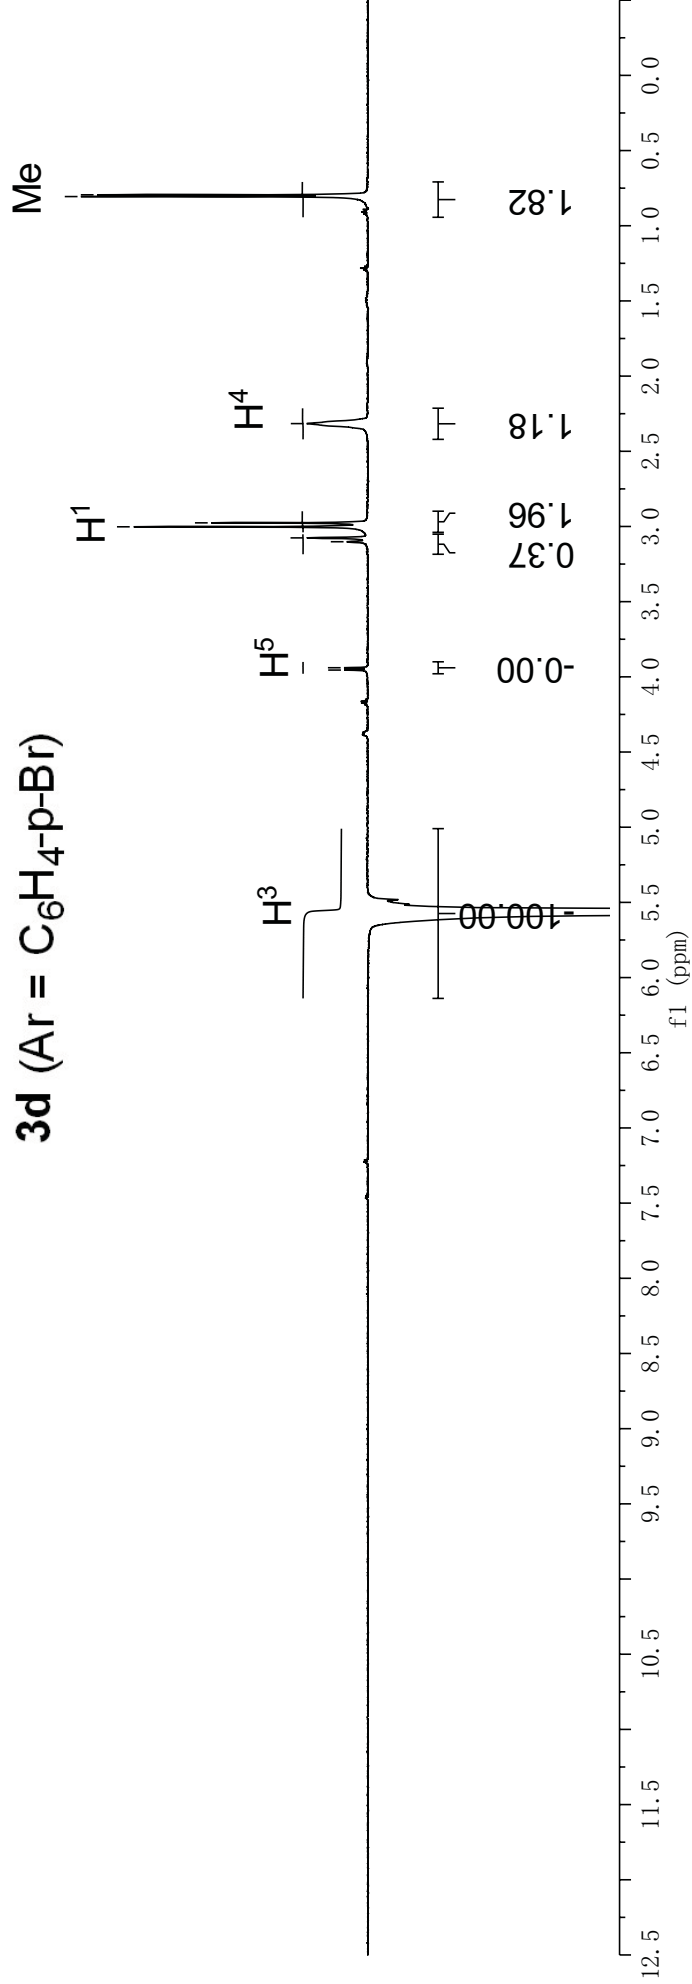

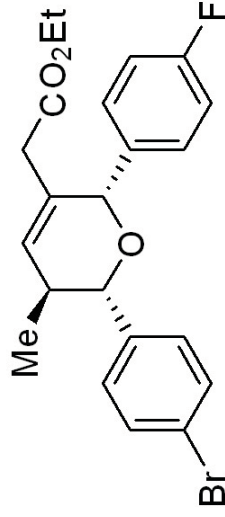

3e

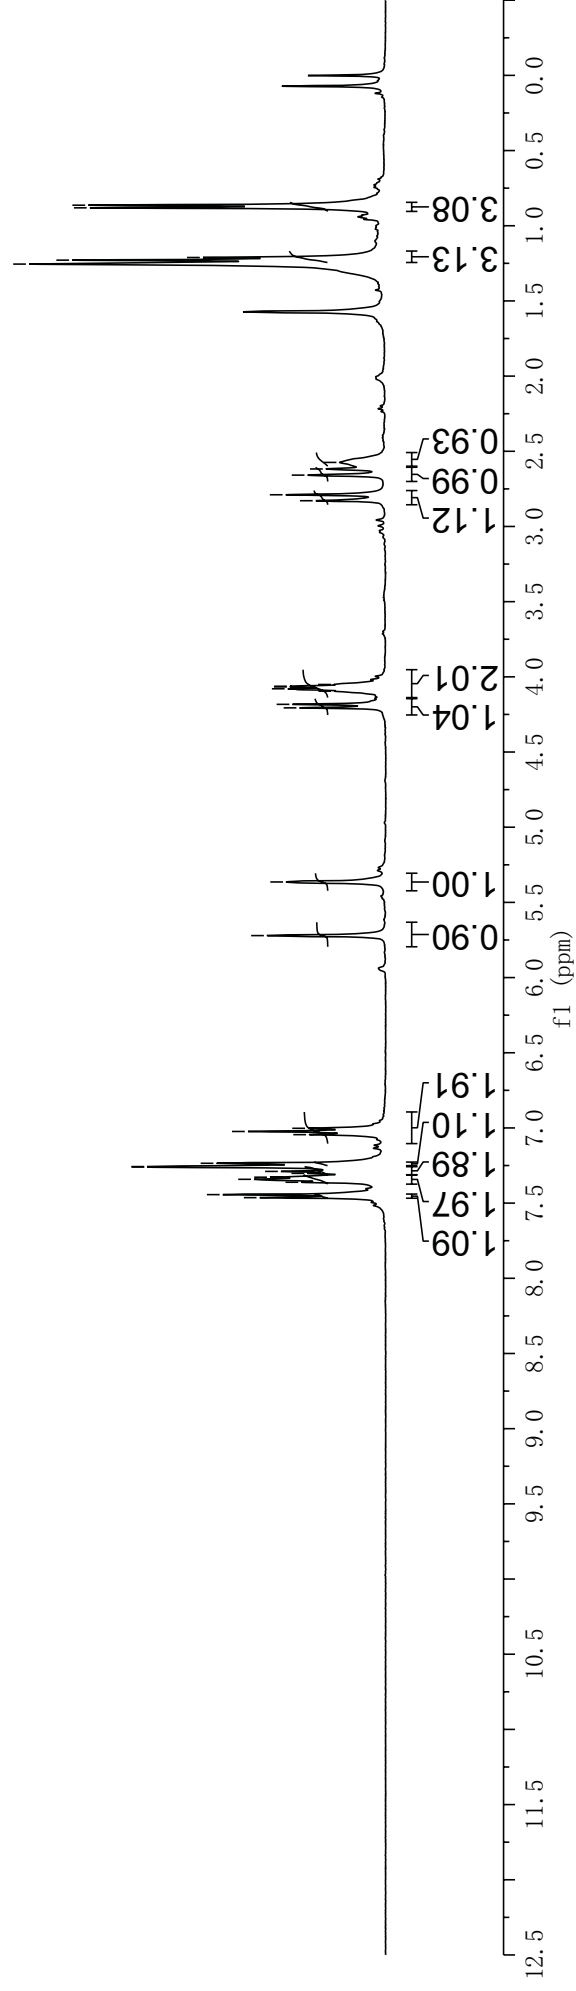

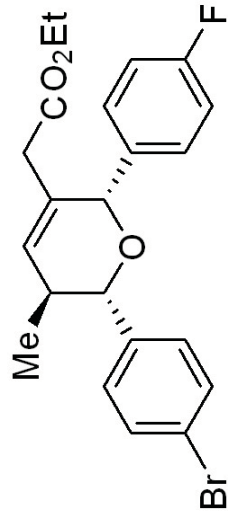

**3e**

171.012  
 163.864  
 160.629  
 139.593  
 135.566  
 132.315  
 131.430  
 131.219  
 130.026  
 129.945  
 128.998  
 127.898  
 127.238  
 121.748  
 115.476  
 115.262  
 82.721  
 79.908  
 77.317  
 77.000  
 76.682  
 60.703  
 38.917  
 36.739  
 16.800  
 ~14.143

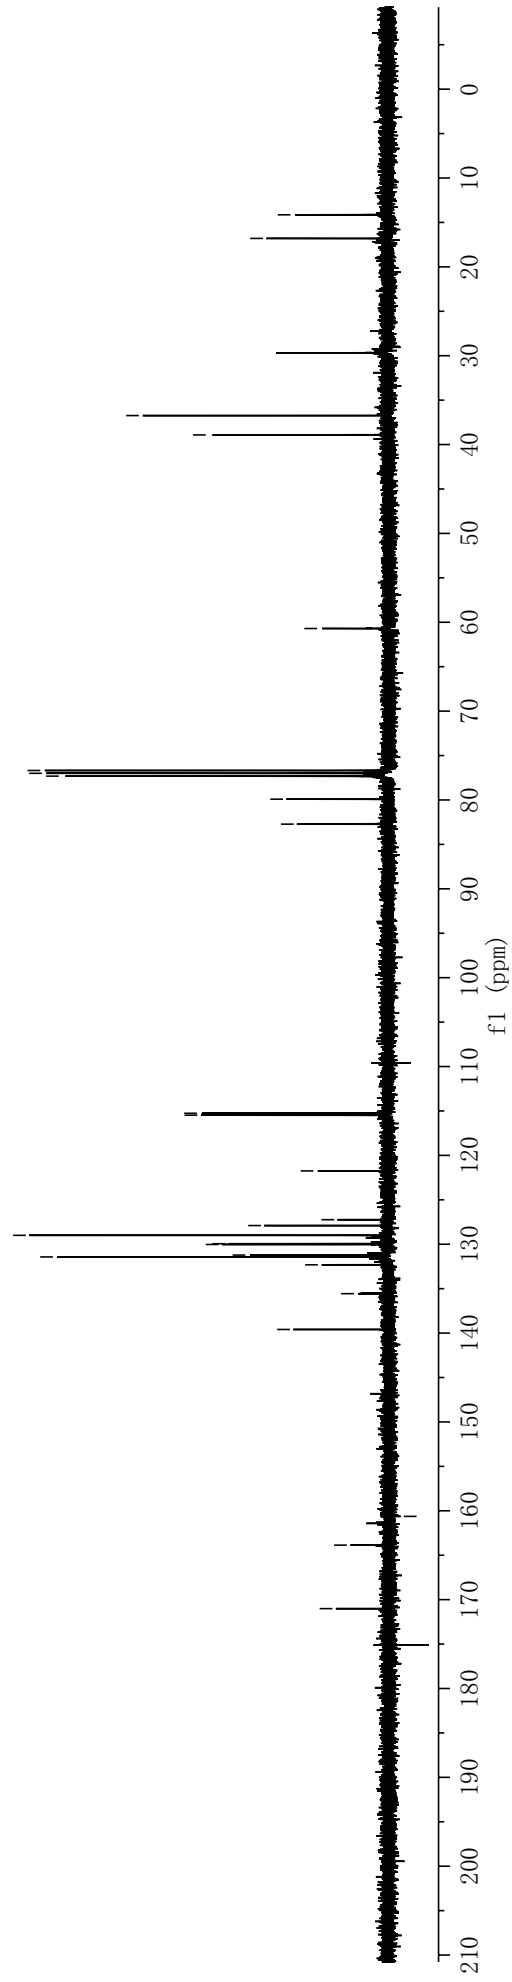

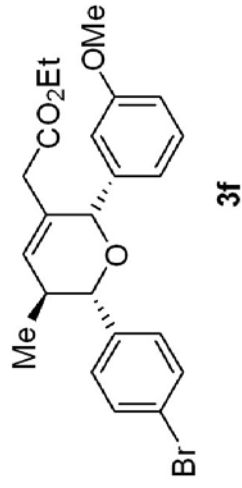

7.460  
7.440  
7.271  
7.252  
7.234  
6.970  
6.951  
6.928  
6.853  
6.833  
5.708  
5.350  
4.209  
4.186  
4.100  
4.095  
4.083  
4.078  
3.809  
3.801  
2.841  
2.801  
2.703  
2.663  
2.577  
1.257  
1.238  
1.220  
0.883  
0.865

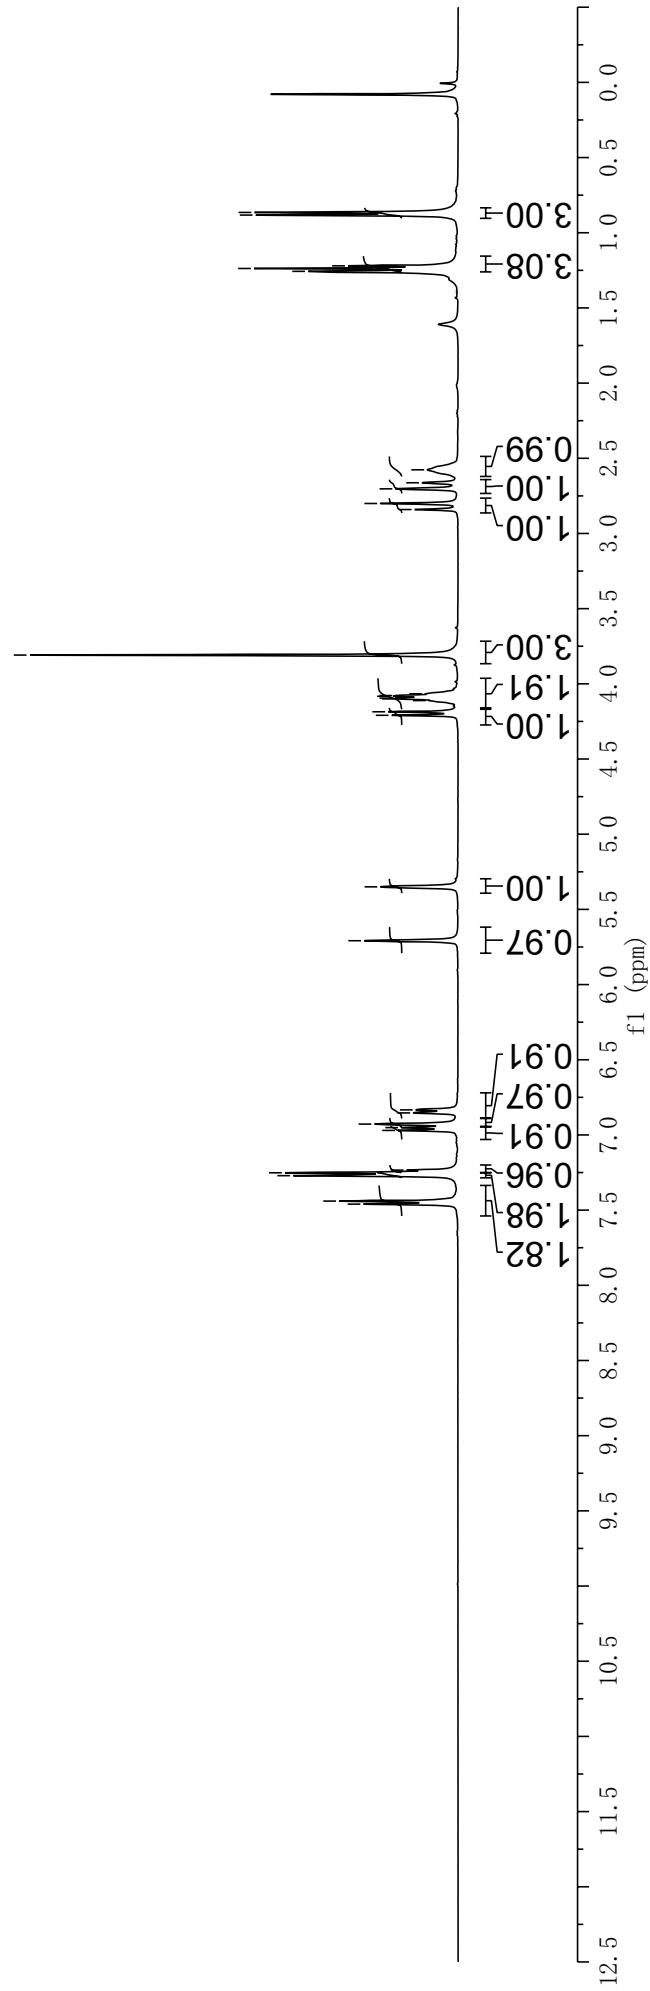

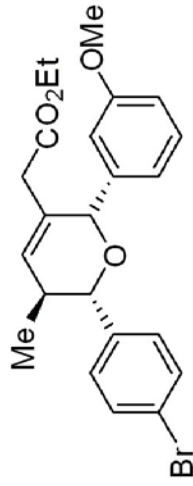

**3f**

| Chemical Shift (ppm) |
|----------------------|
| 171.151              |
| 159.661              |
| 141.251              |
| 139.748              |
| 132.449              |
| 131.337              |
| 130.839              |
| 129.459              |
| 129.033              |
| 121.623              |
| 120.721              |
| 113.861              |
| 113.612              |
| 82.613               |
| 80.542               |
| 77.212               |
| 77.000               |
| 76.788               |
| 60.618               |
| 55.203               |
| 38.880               |
| 36.737               |
| 14.218               |
| 14.071               |

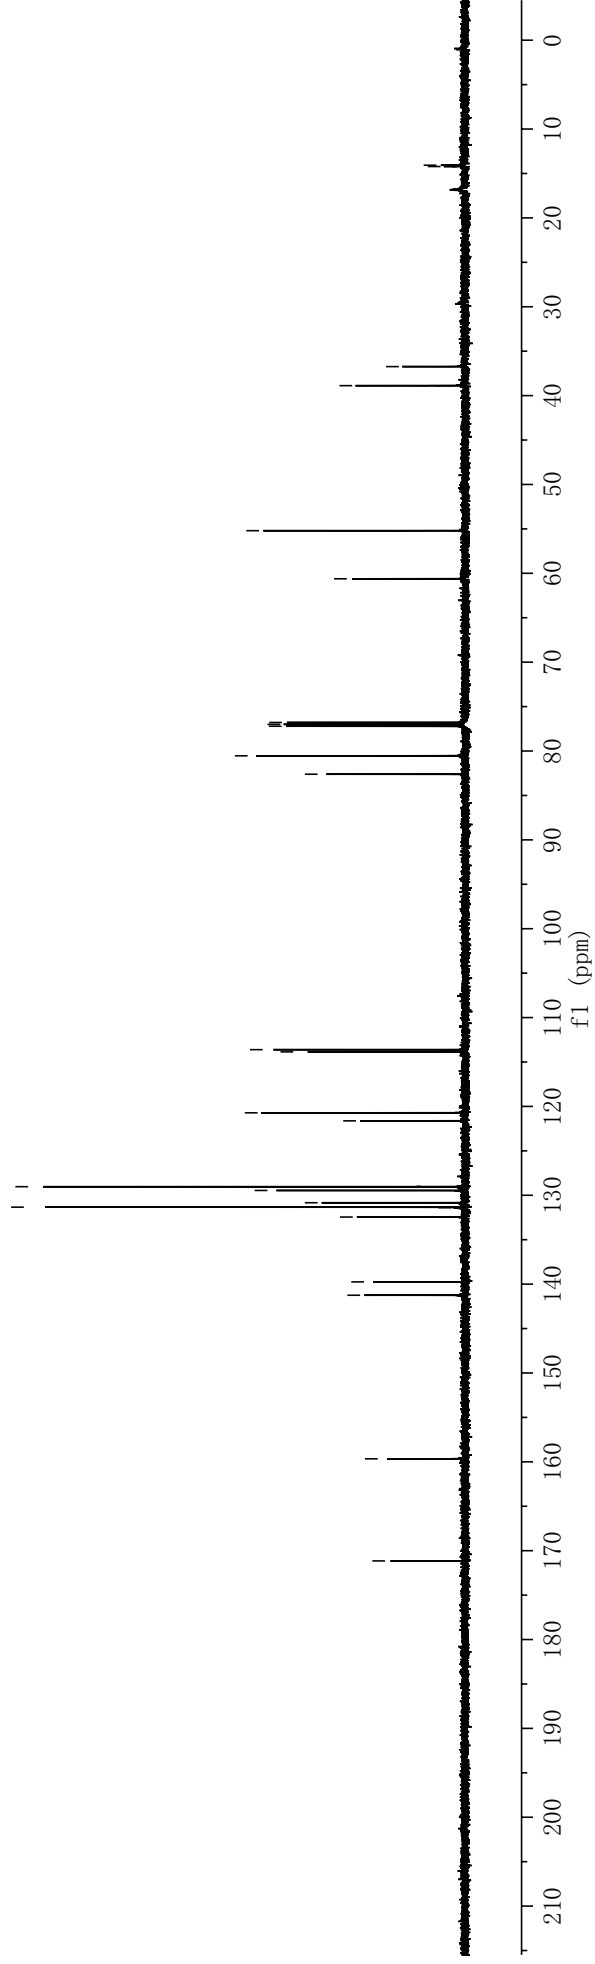

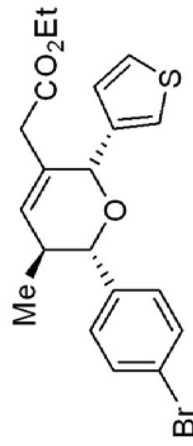

3g

- 7.462
- 7.442
- 7.296
- 7.289
- 7.276
- 7.260
- 7.238
- 7.093
- 7.081
- 5.683
- 5.521
- 4.189
- 4.165
- 4.118
- 4.101
- 4.084
- 4.067
- 2.865
- 2.824
- 2.740
- 2.700
- 2.551
- 1.256
- 1.244
- 1.227
- 0.869
- 0.852

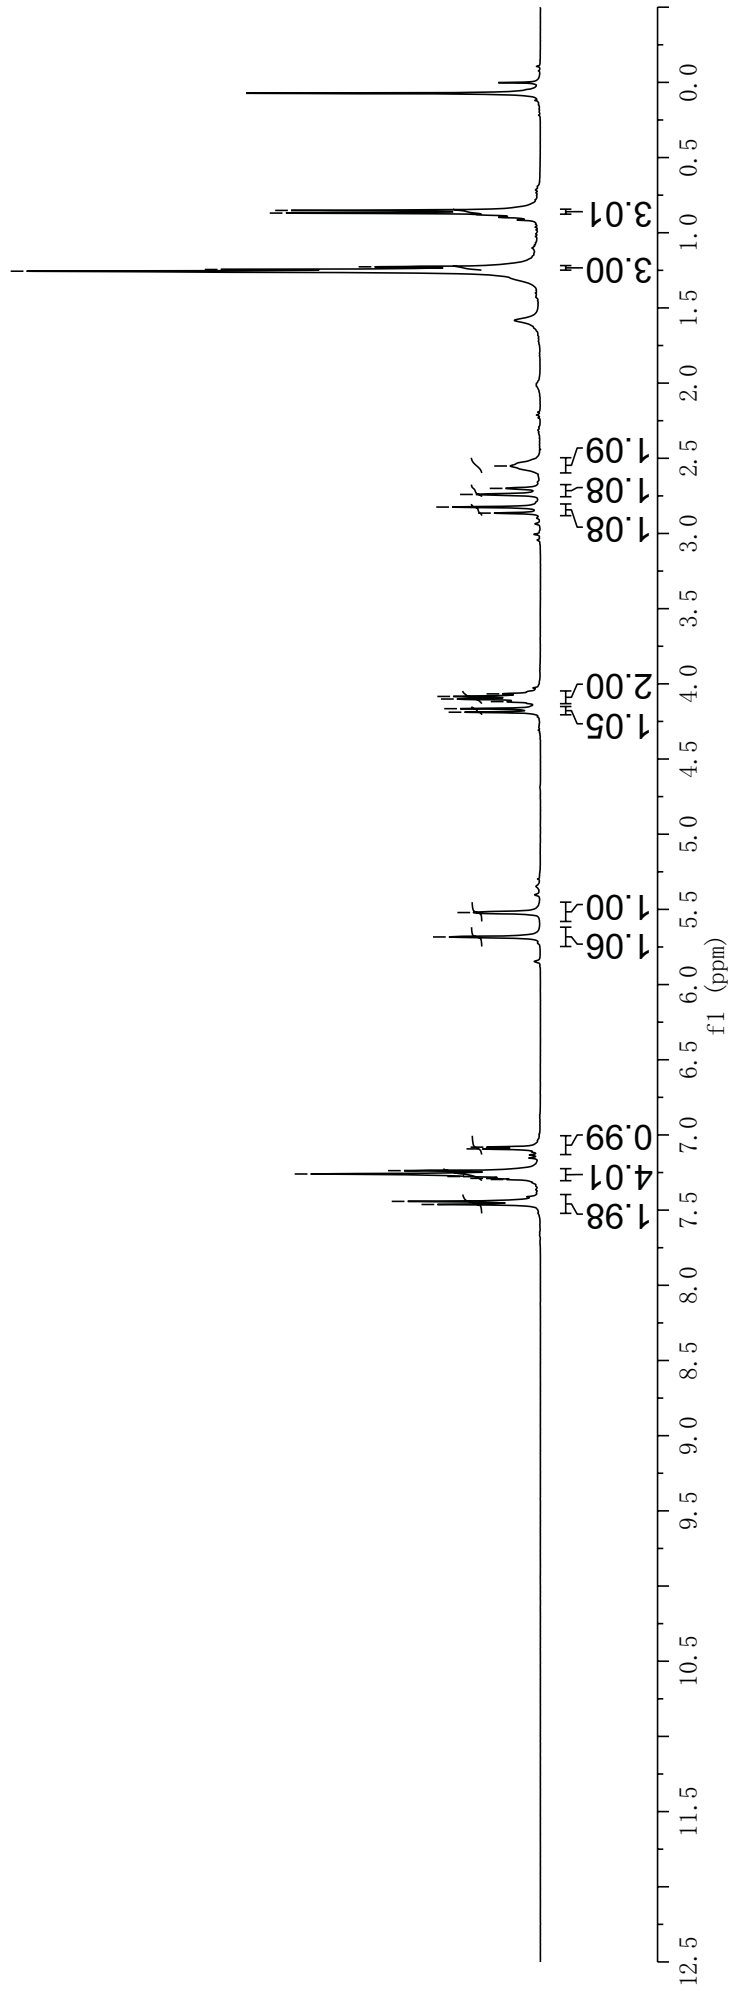

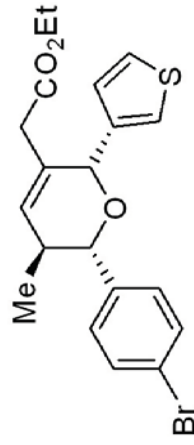

3g

|         |         |         |         |         |         |         |         |         |         |         |
|---------|---------|---------|---------|---------|---------|---------|---------|---------|---------|---------|
| 171.125 | 140.635 | 139.694 | 132.136 | 131.386 | 130.719 | 129.029 | 126.605 | 126.058 | 124.098 | 121.682 |
| 82.747  | 77.211  | 77.000  | 76.788  | 75.988  | 60.666  | 38.854  | 36.695  | 16.779  | 14.181  |         |

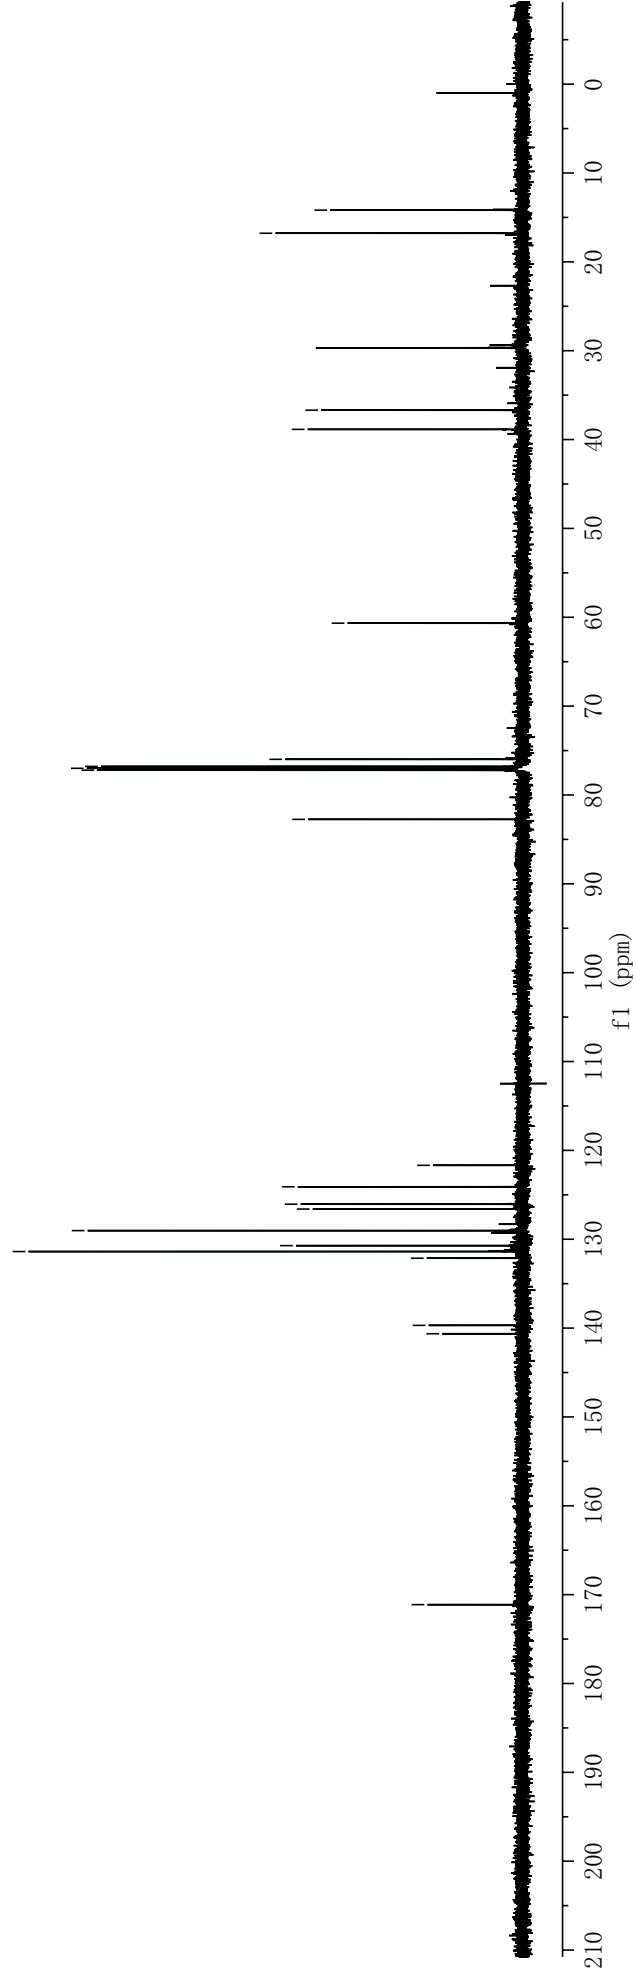

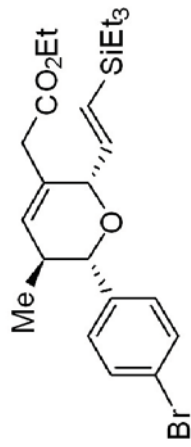

3h

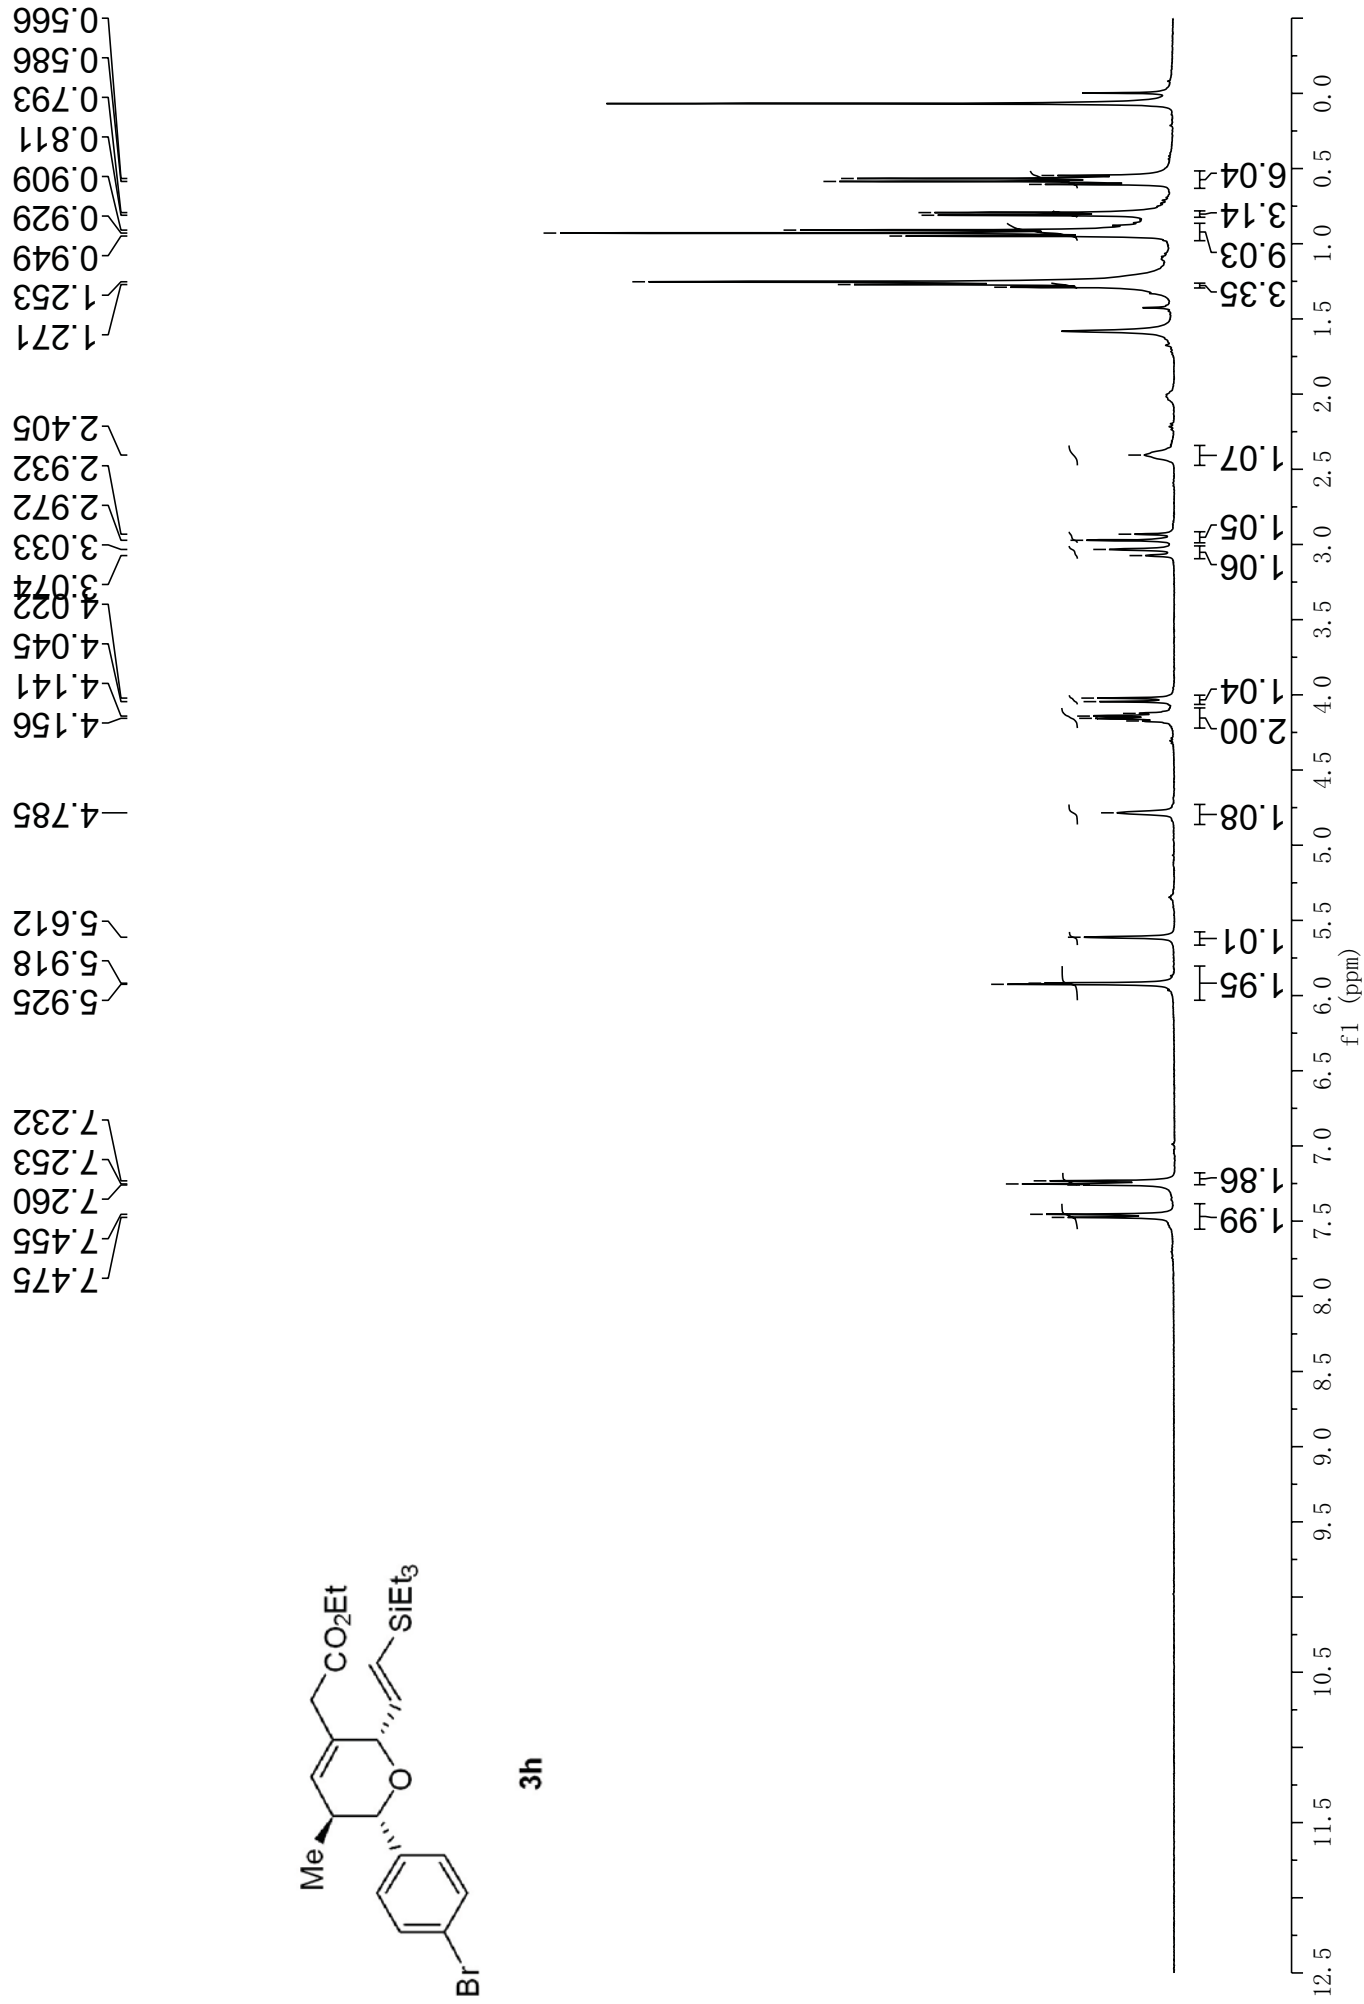



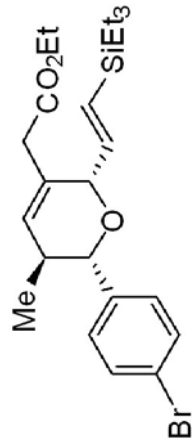

3h

|         |        |        |        |        |        |        |        |        |        |        |       |       |
|---------|--------|--------|--------|--------|--------|--------|--------|--------|--------|--------|-------|-------|
| 171.225 | 82.139 | 82.064 | 77.211 | 77.000 | 76.788 | 60.683 | 38.696 | 36.624 | 16.773 | 14.196 | 7.346 | 3.317 |
|---------|--------|--------|--------|--------|--------|--------|--------|--------|--------|--------|-------|-------|

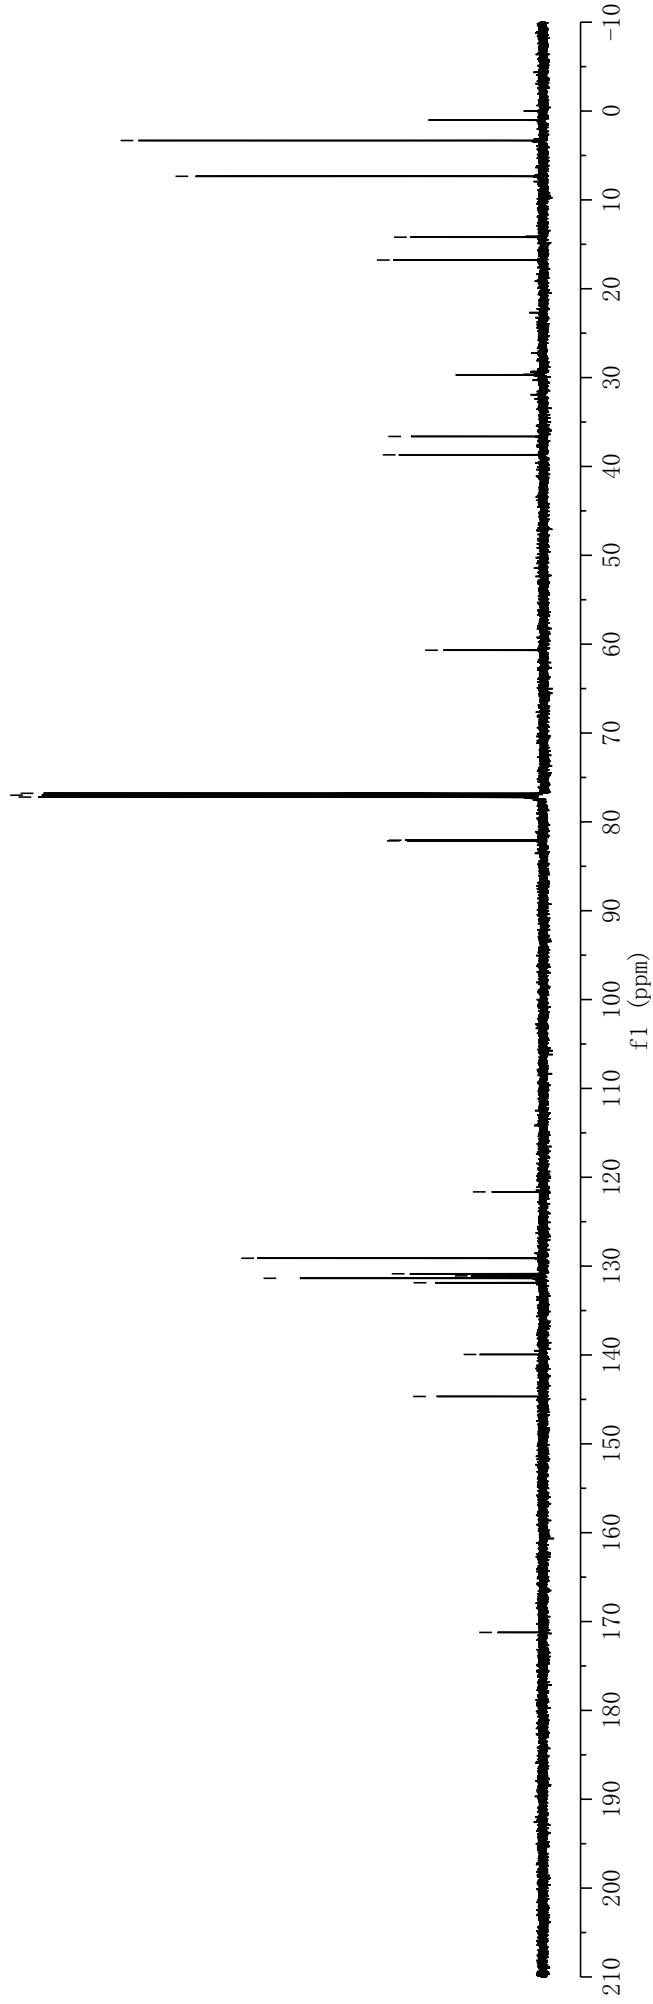

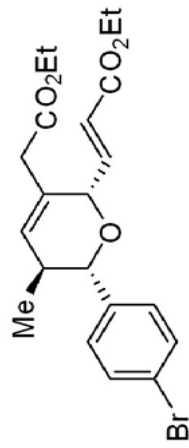

3i

7.492  
7.471  
7.260  
7.249  
7.228  
6.928  
6.911  
6.889  
6.872  
6.157  
6.118  
5.668  
5.024  
4.204  
4.186  
4.169  
4.152  
4.050  
3.052  
3.024  
2.984  
2.424  
1.299  
1.282  
1.264  
0.829  
0.811

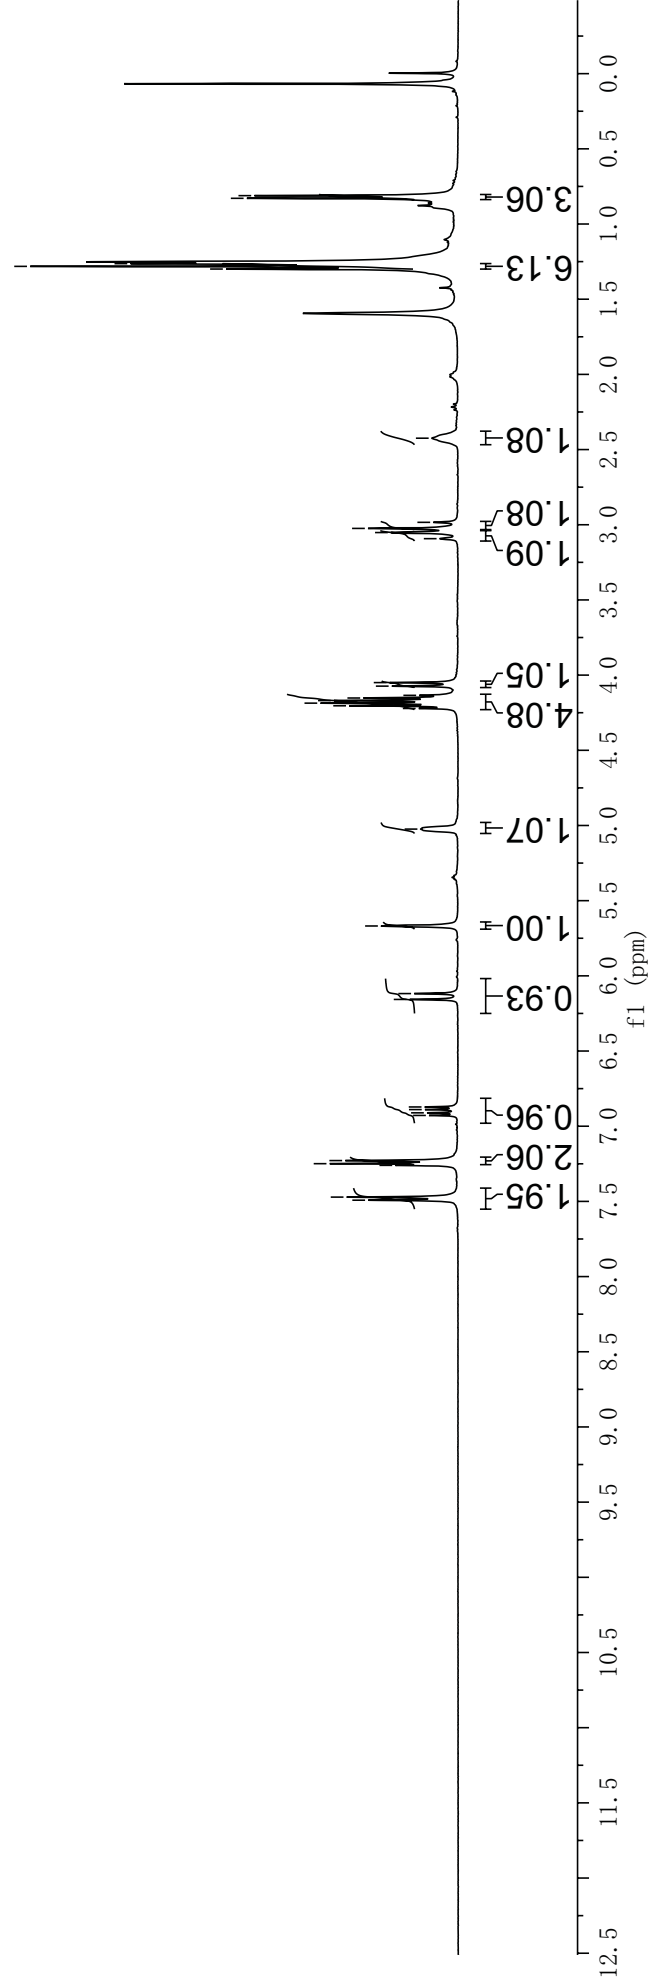

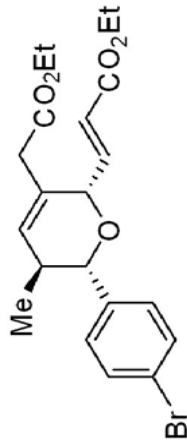

3i

- 170.828
- 165.999
- 144.427
- 139.392
- 132.020
- 131.476
- 129.833
- 128.970
- 123.800
- 121.883
- 82.069
- 77.212
- 77.000
- 76.825
- 76.788
- 60.961
- 60.536
- 38.727
- 36.450
- 16.646
- 14.222
- 14.168

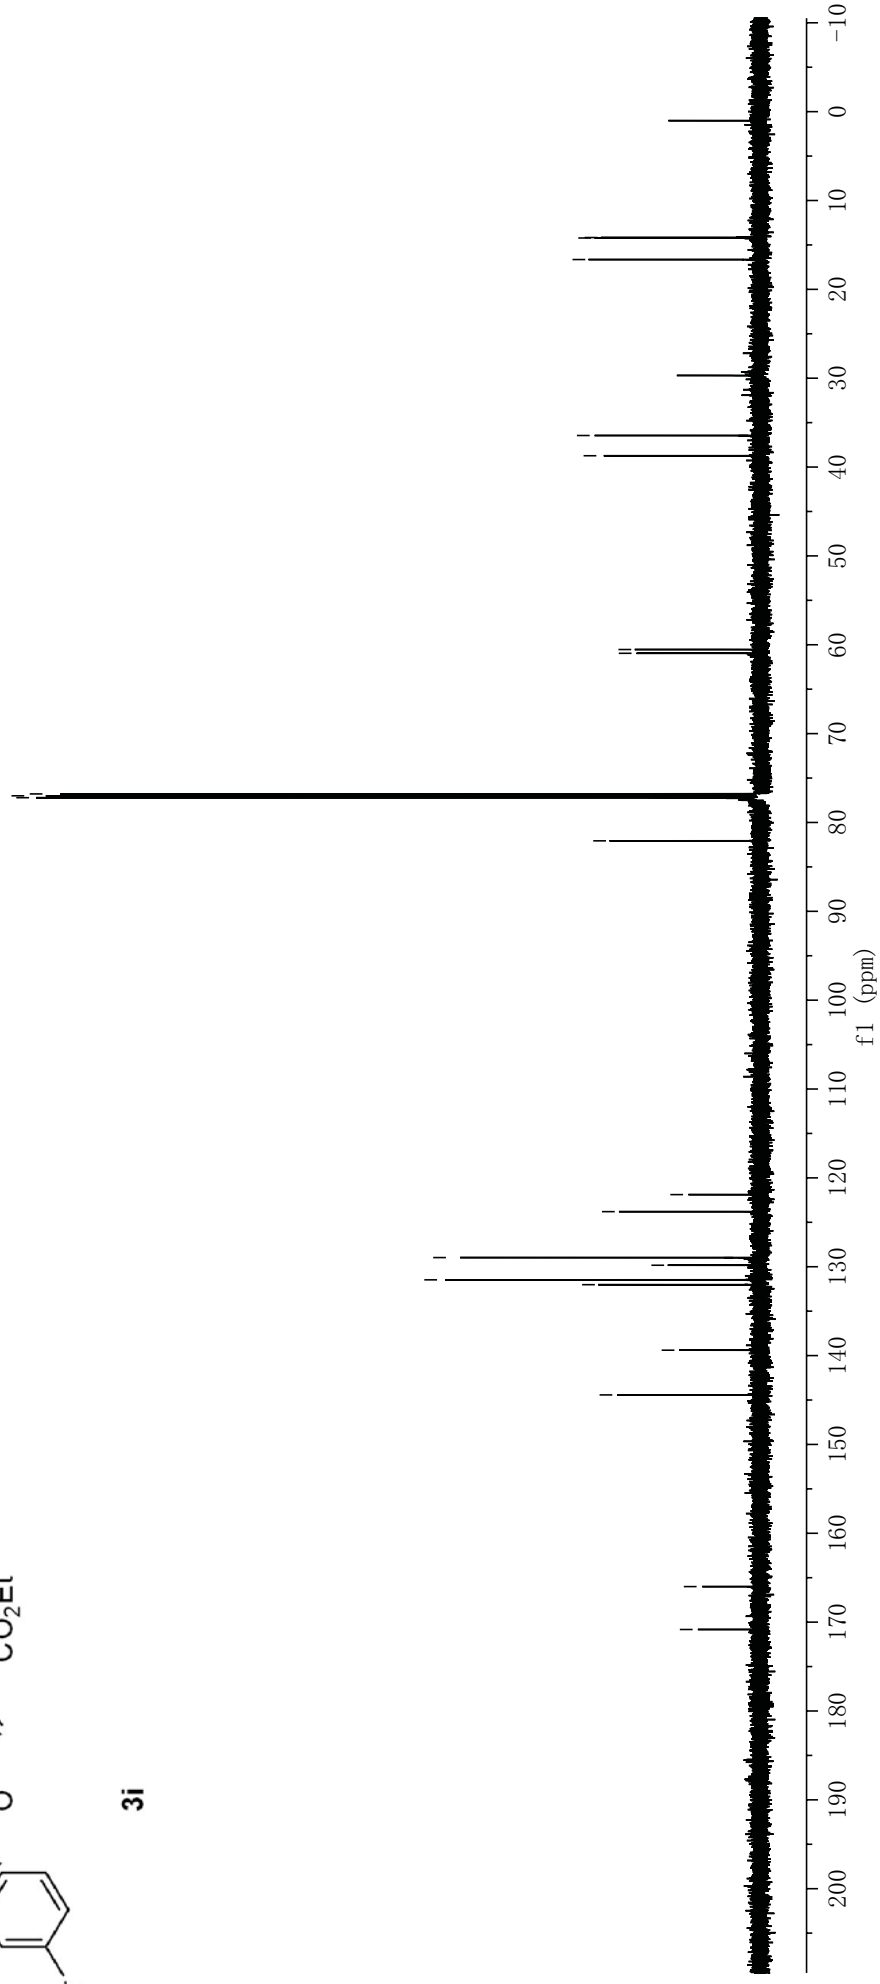



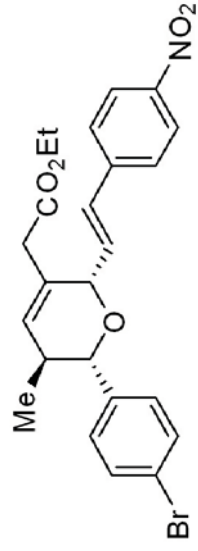

3j

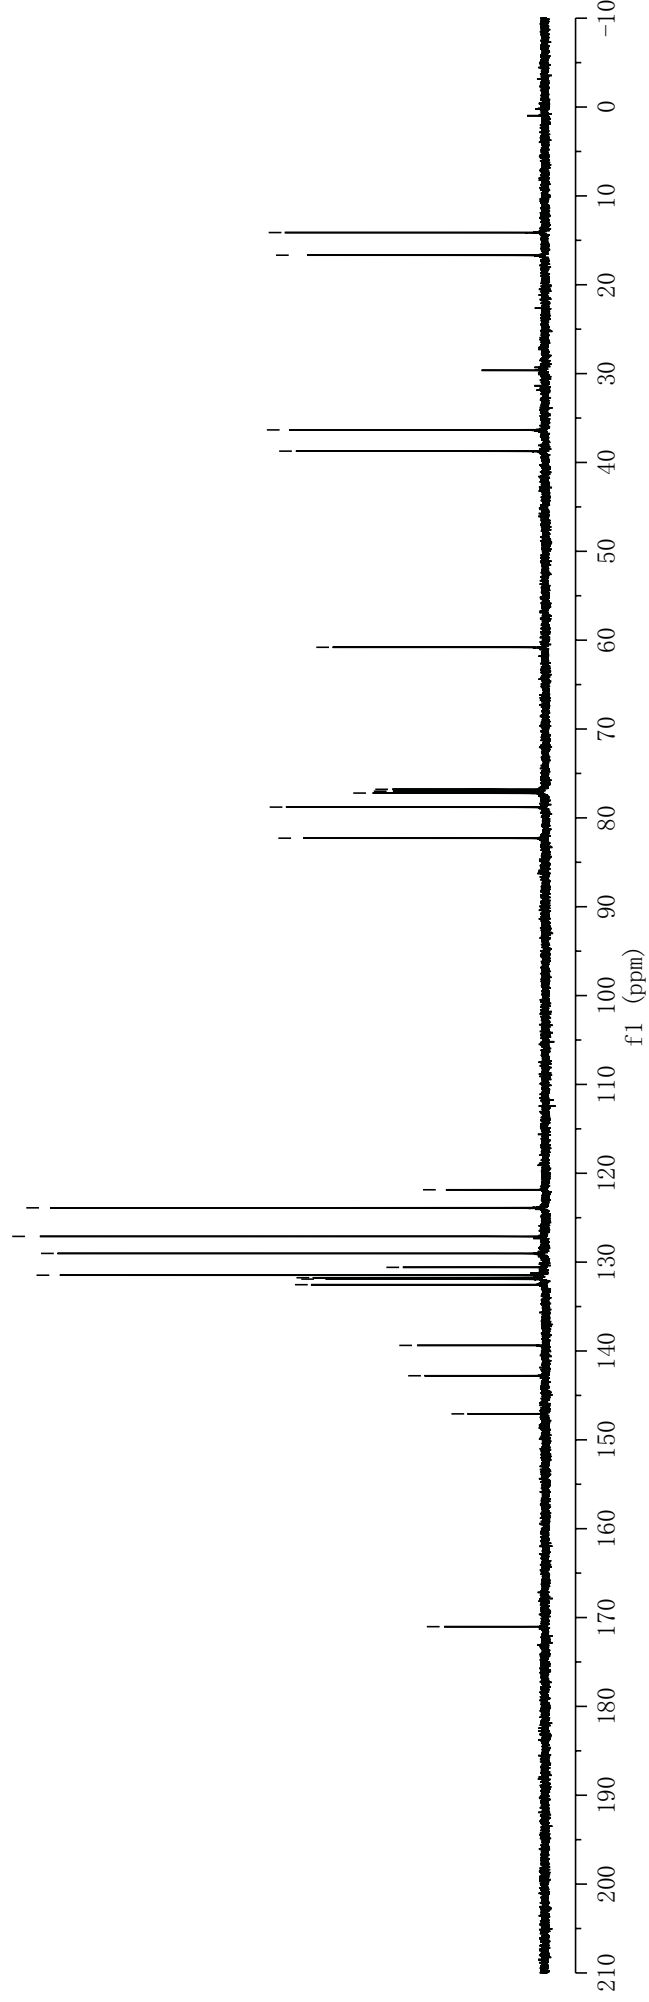

| Chemical Shift (ppm) |
|----------------------|
| 171.026              |
| 147.078              |
| 142.787              |
| 139.372              |
| 132.539              |
| 131.910              |
| 131.759              |
| 131.472              |
| 130.587              |
| 129.019              |
| 127.105              |
| 123.890              |
| 121.856              |
| 82.287               |
| 78.789               |
| 77.210               |
| 77.000               |
| 76.788               |
| 60.802               |
| 38.726               |
| 36.337               |
| 16.674               |
| 14.126               |

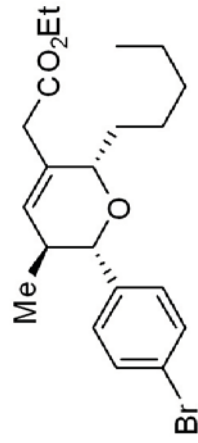

3k

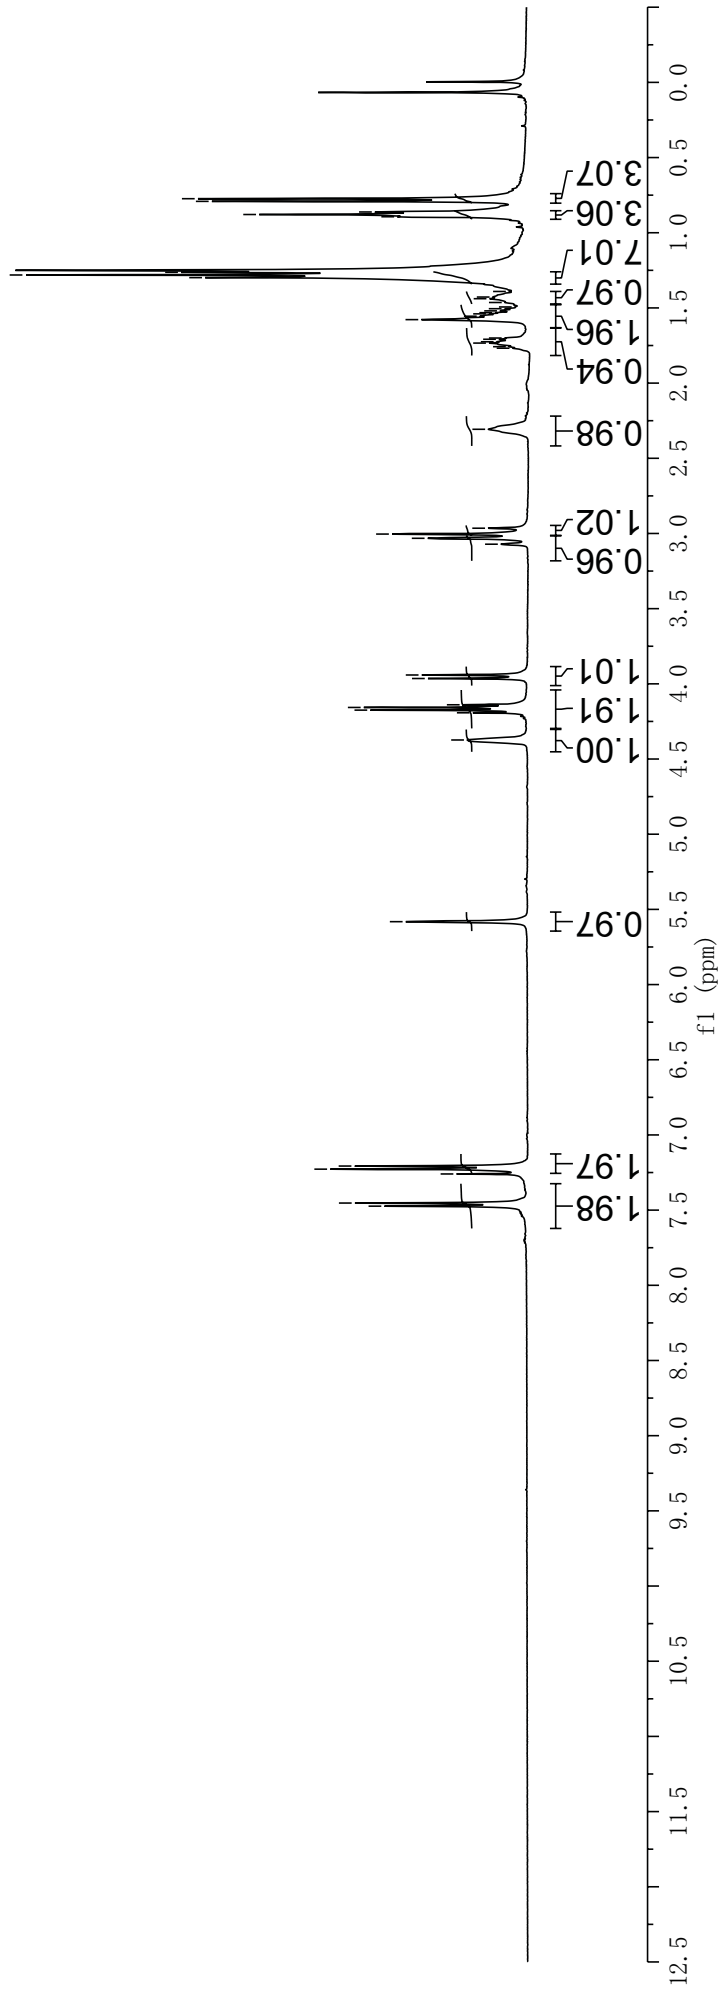

7.474  
7.453  
7.260  
7.228  
7.207  
5.582  
4.373  
4.193  
4.175  
4.157  
4.139  
3.965  
3.941  
3.071  
3.032  
3.004  
2.965  
2.307  
1.578  
1.555  
1.299  
1.281  
1.263  
0.894  
0.879  
0.862  
0.791  
0.774

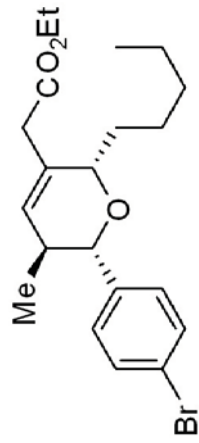

3k

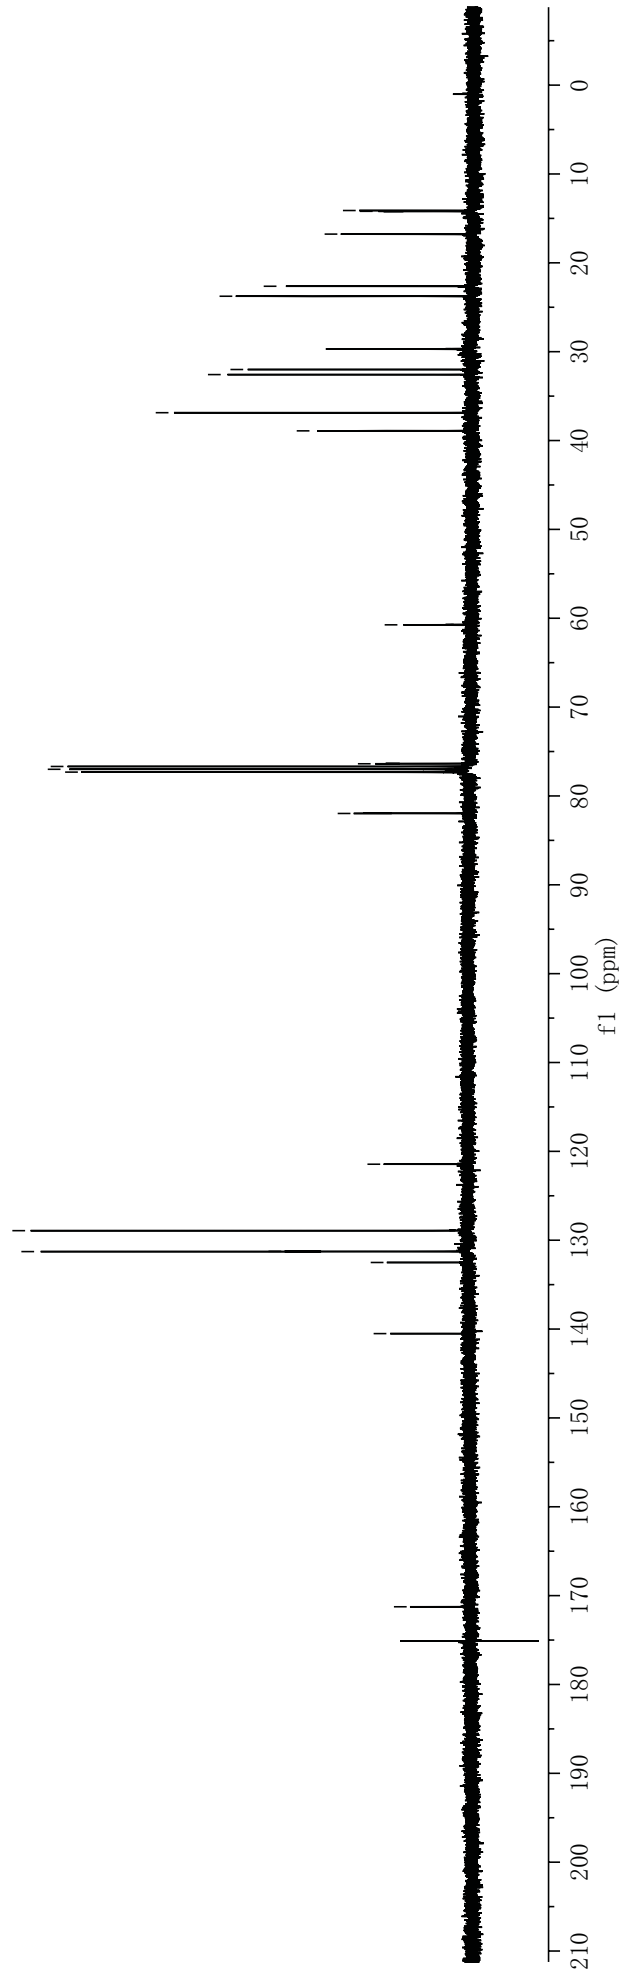

| Chemical Shift (ppm) |
|----------------------|
| 171.255              |
| 140.511              |
| 132.507              |
| 131.281              |
| 131.251              |
| 128.925              |
| 121.447              |
| 81.972               |
| 77.318               |
| 77.000               |
| 76.682               |
| 76.379               |
| 60.742               |
| 38.911               |
| 36.866               |
| 32.578               |
| 32.007               |
| 23.759               |
| 22.637               |
| 16.767               |
| 14.201               |
| 14.112               |

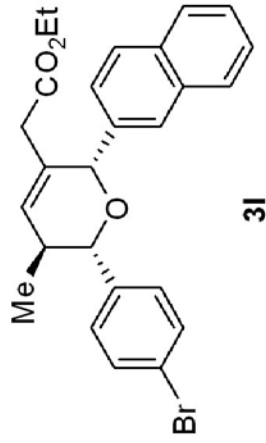

7.855  
7.833  
7.808  
7.528  
7.507  
7.486  
7.478  
7.465  
7.445  
7.296  
7.276  
7.260  
5.782  
5.557  
4.284  
4.261  
4.068  
4.051  
4.033  
4.016  
3.998  
3.981  
2.850  
2.810  
2.684  
2.645  
1.179  
1.161  
1.143  
0.922  
0.905

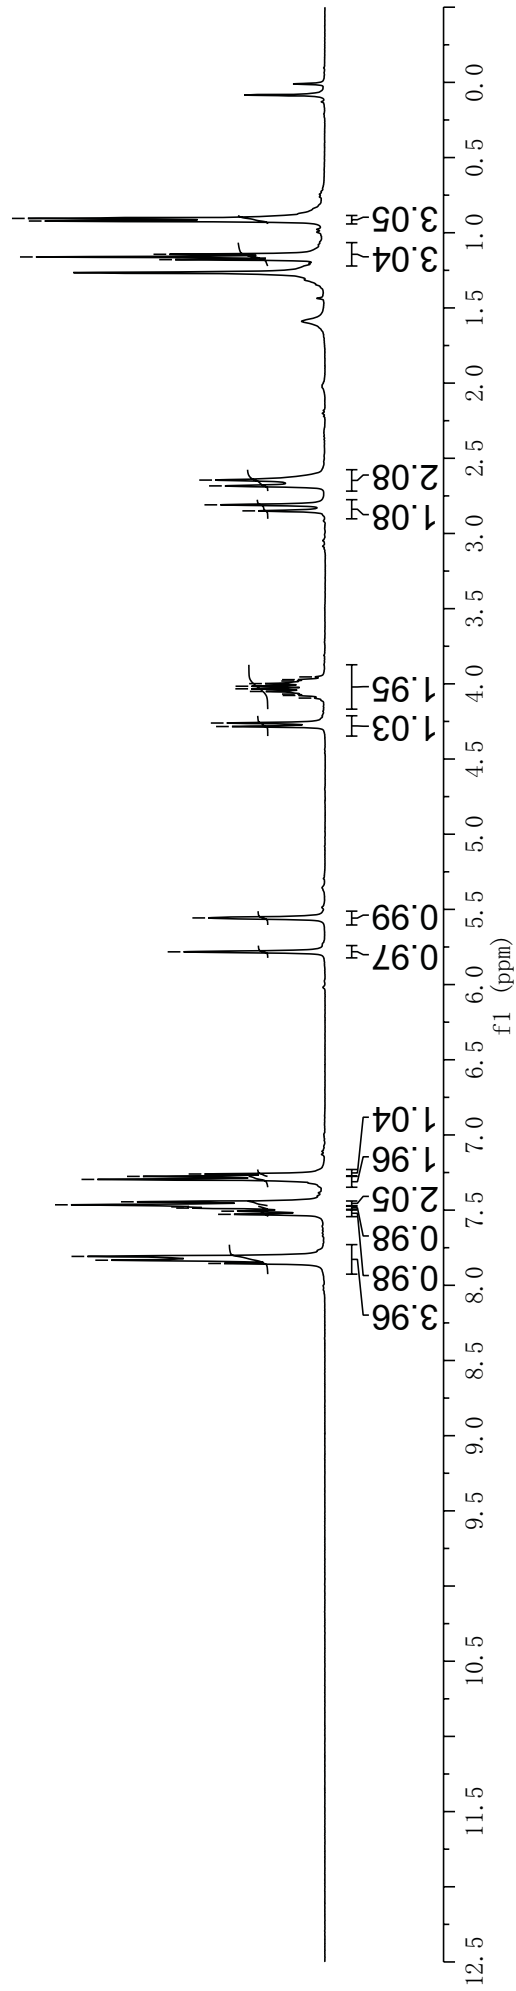



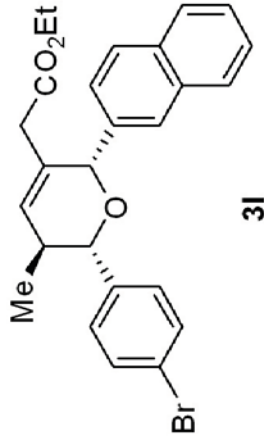

171.103  
139.763  
137.034  
133.398  
133.194  
132.389  
131.358  
131.197  
129.039  
128.461  
128.049  
127.936  
127.888  
127.633  
126.072  
126.039  
125.415  
121.650  
82.634  
80.790  
77.211  
77.000  
76.788  
60.609  
38.934  
36.856  
14.142  
13.978

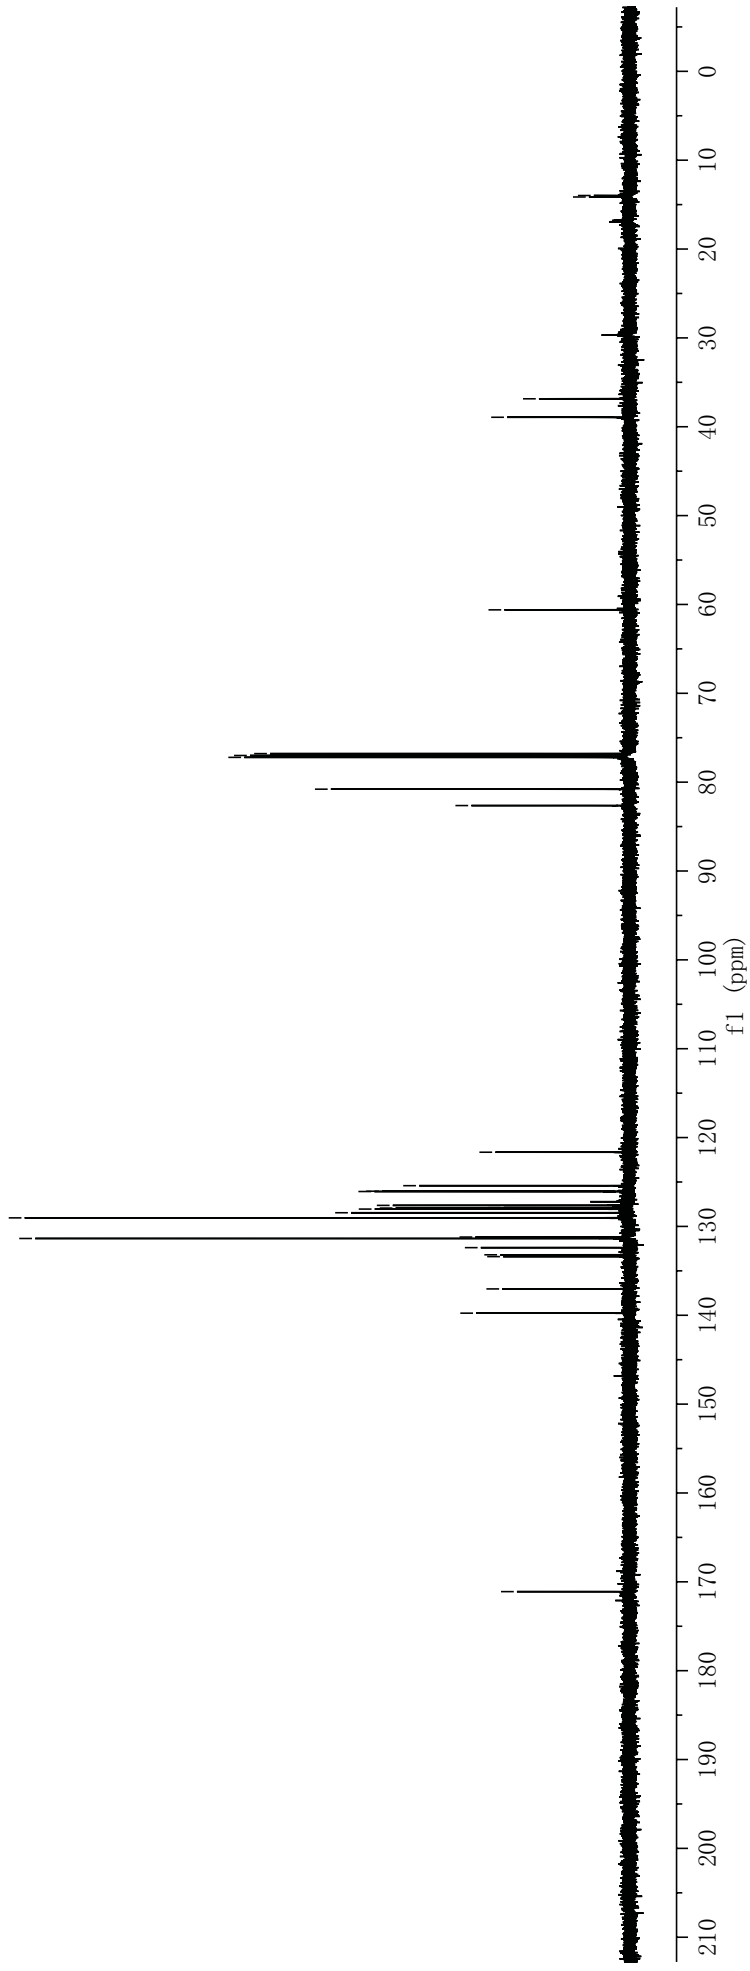

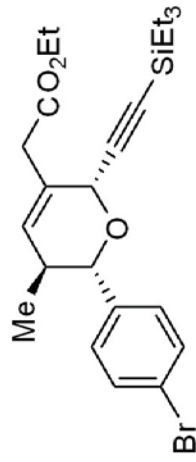

3m

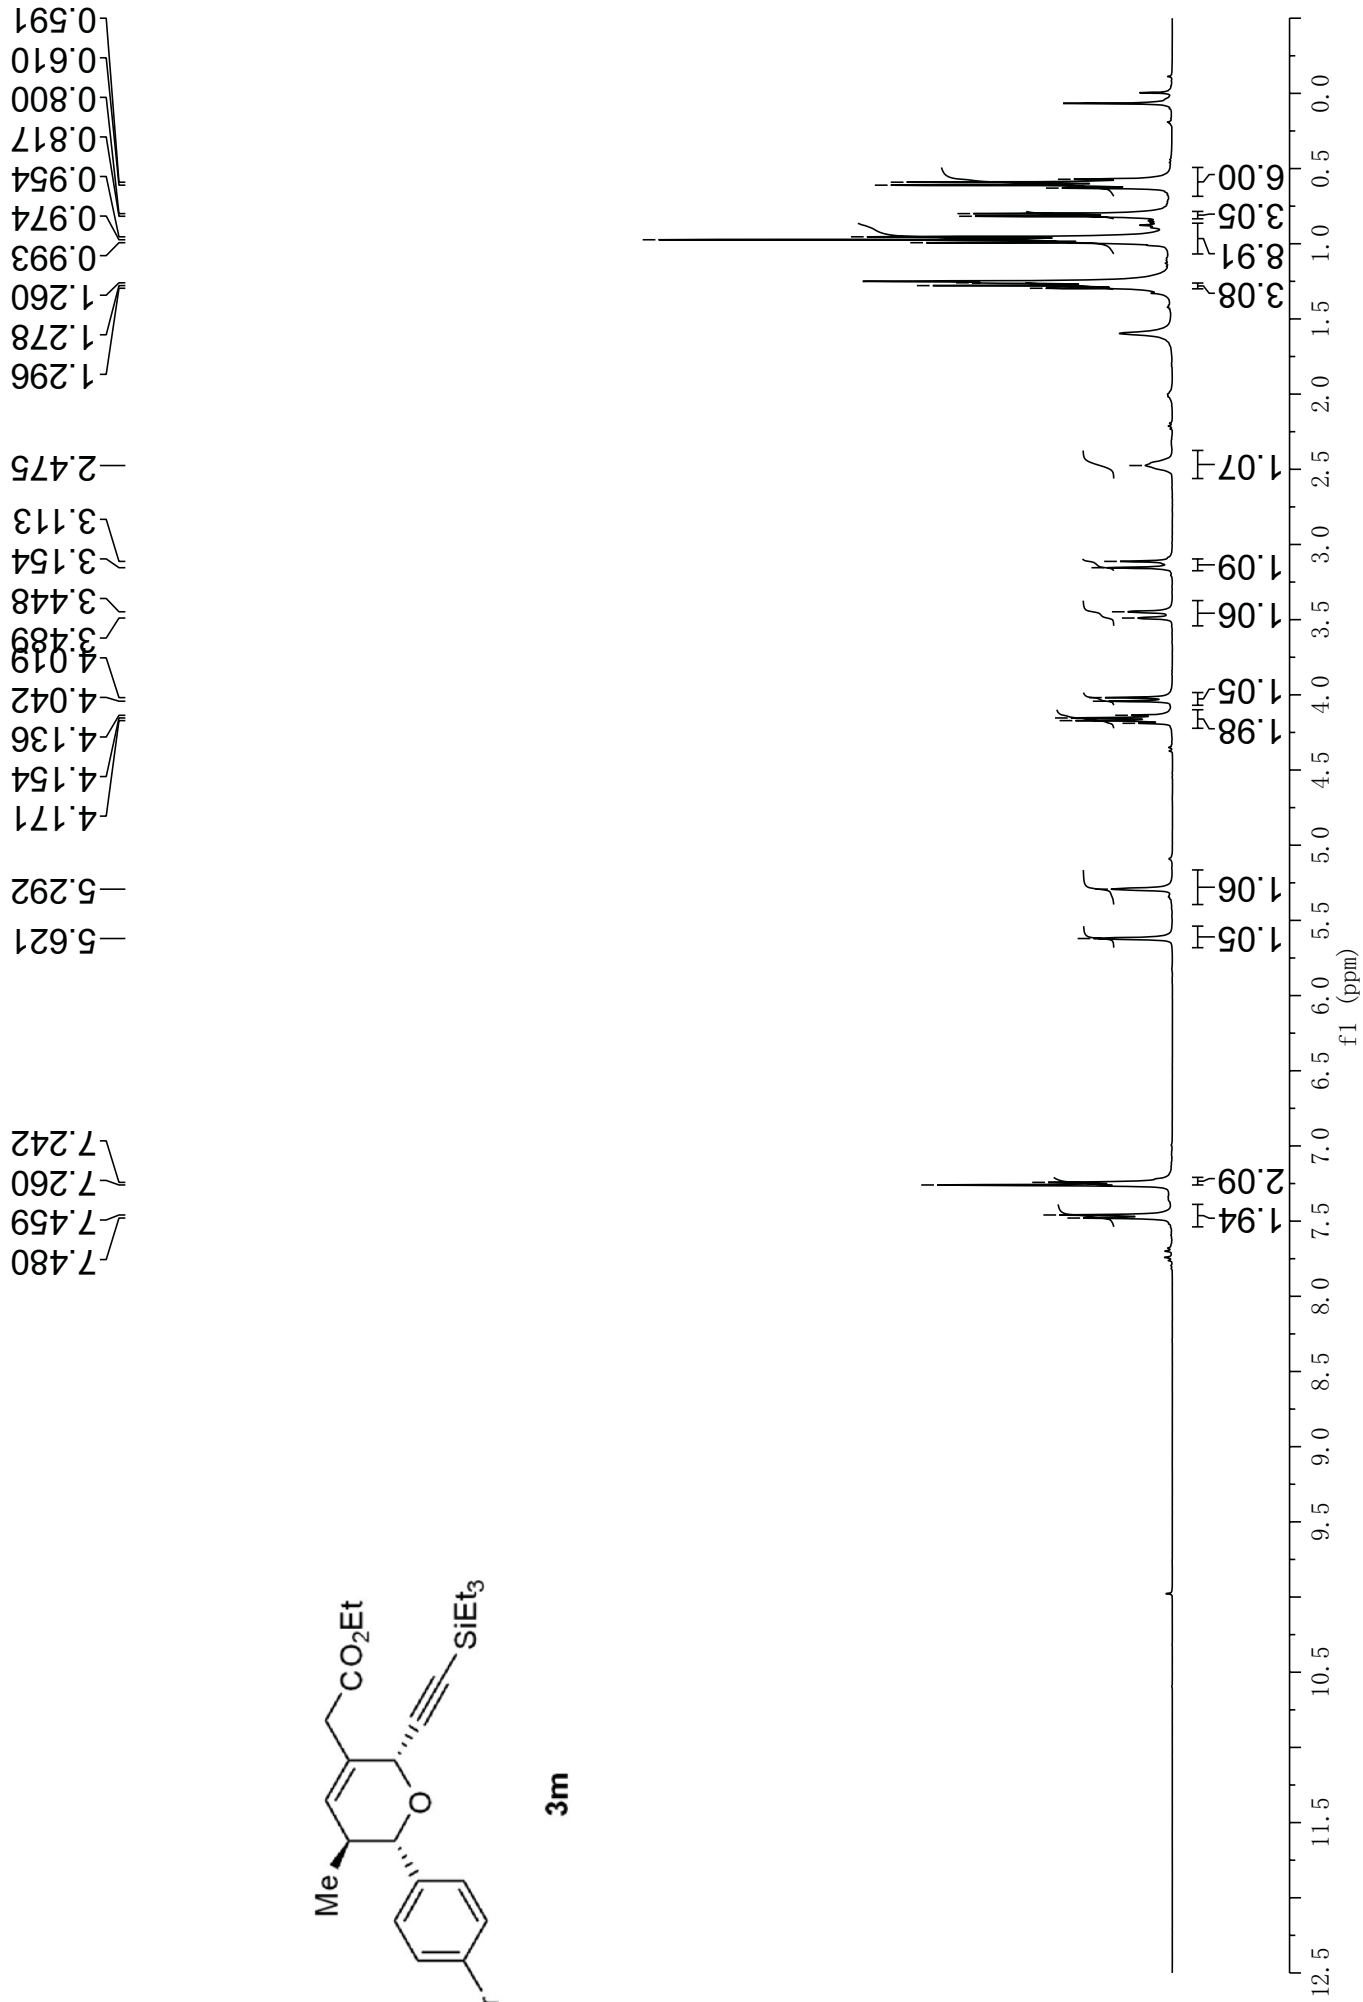

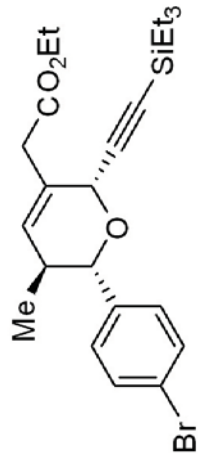

3m

- ~171.031
- ~139.103
- ~131.417
- ~131.045
- ~129.267
- ~129.162
- ~121.881
- 102.539
- ~88.934
- ~82.769
- ~77.317
- ~77.000
- ~76.682
- ~69.074
- ~60.757
- ~38.981
- ~36.182
- ~16.576
- ~14.157
- ~7.395
- ~4.186

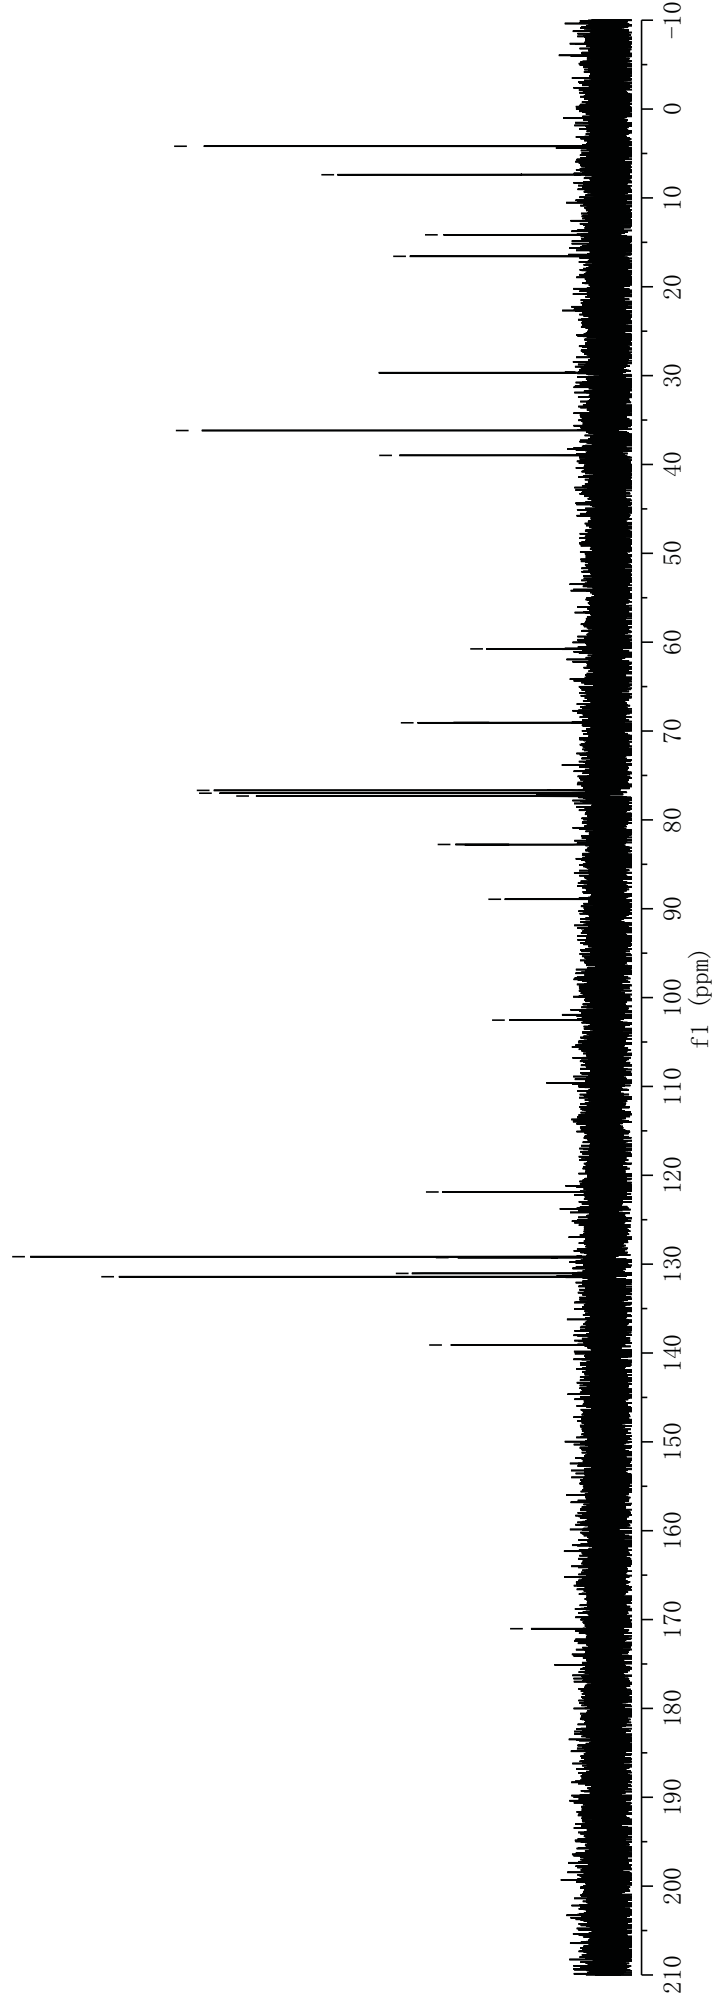

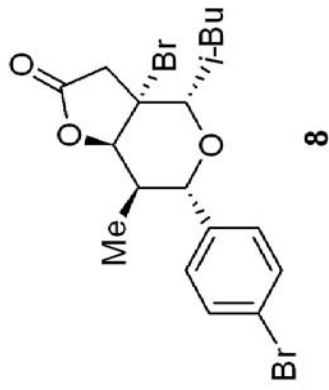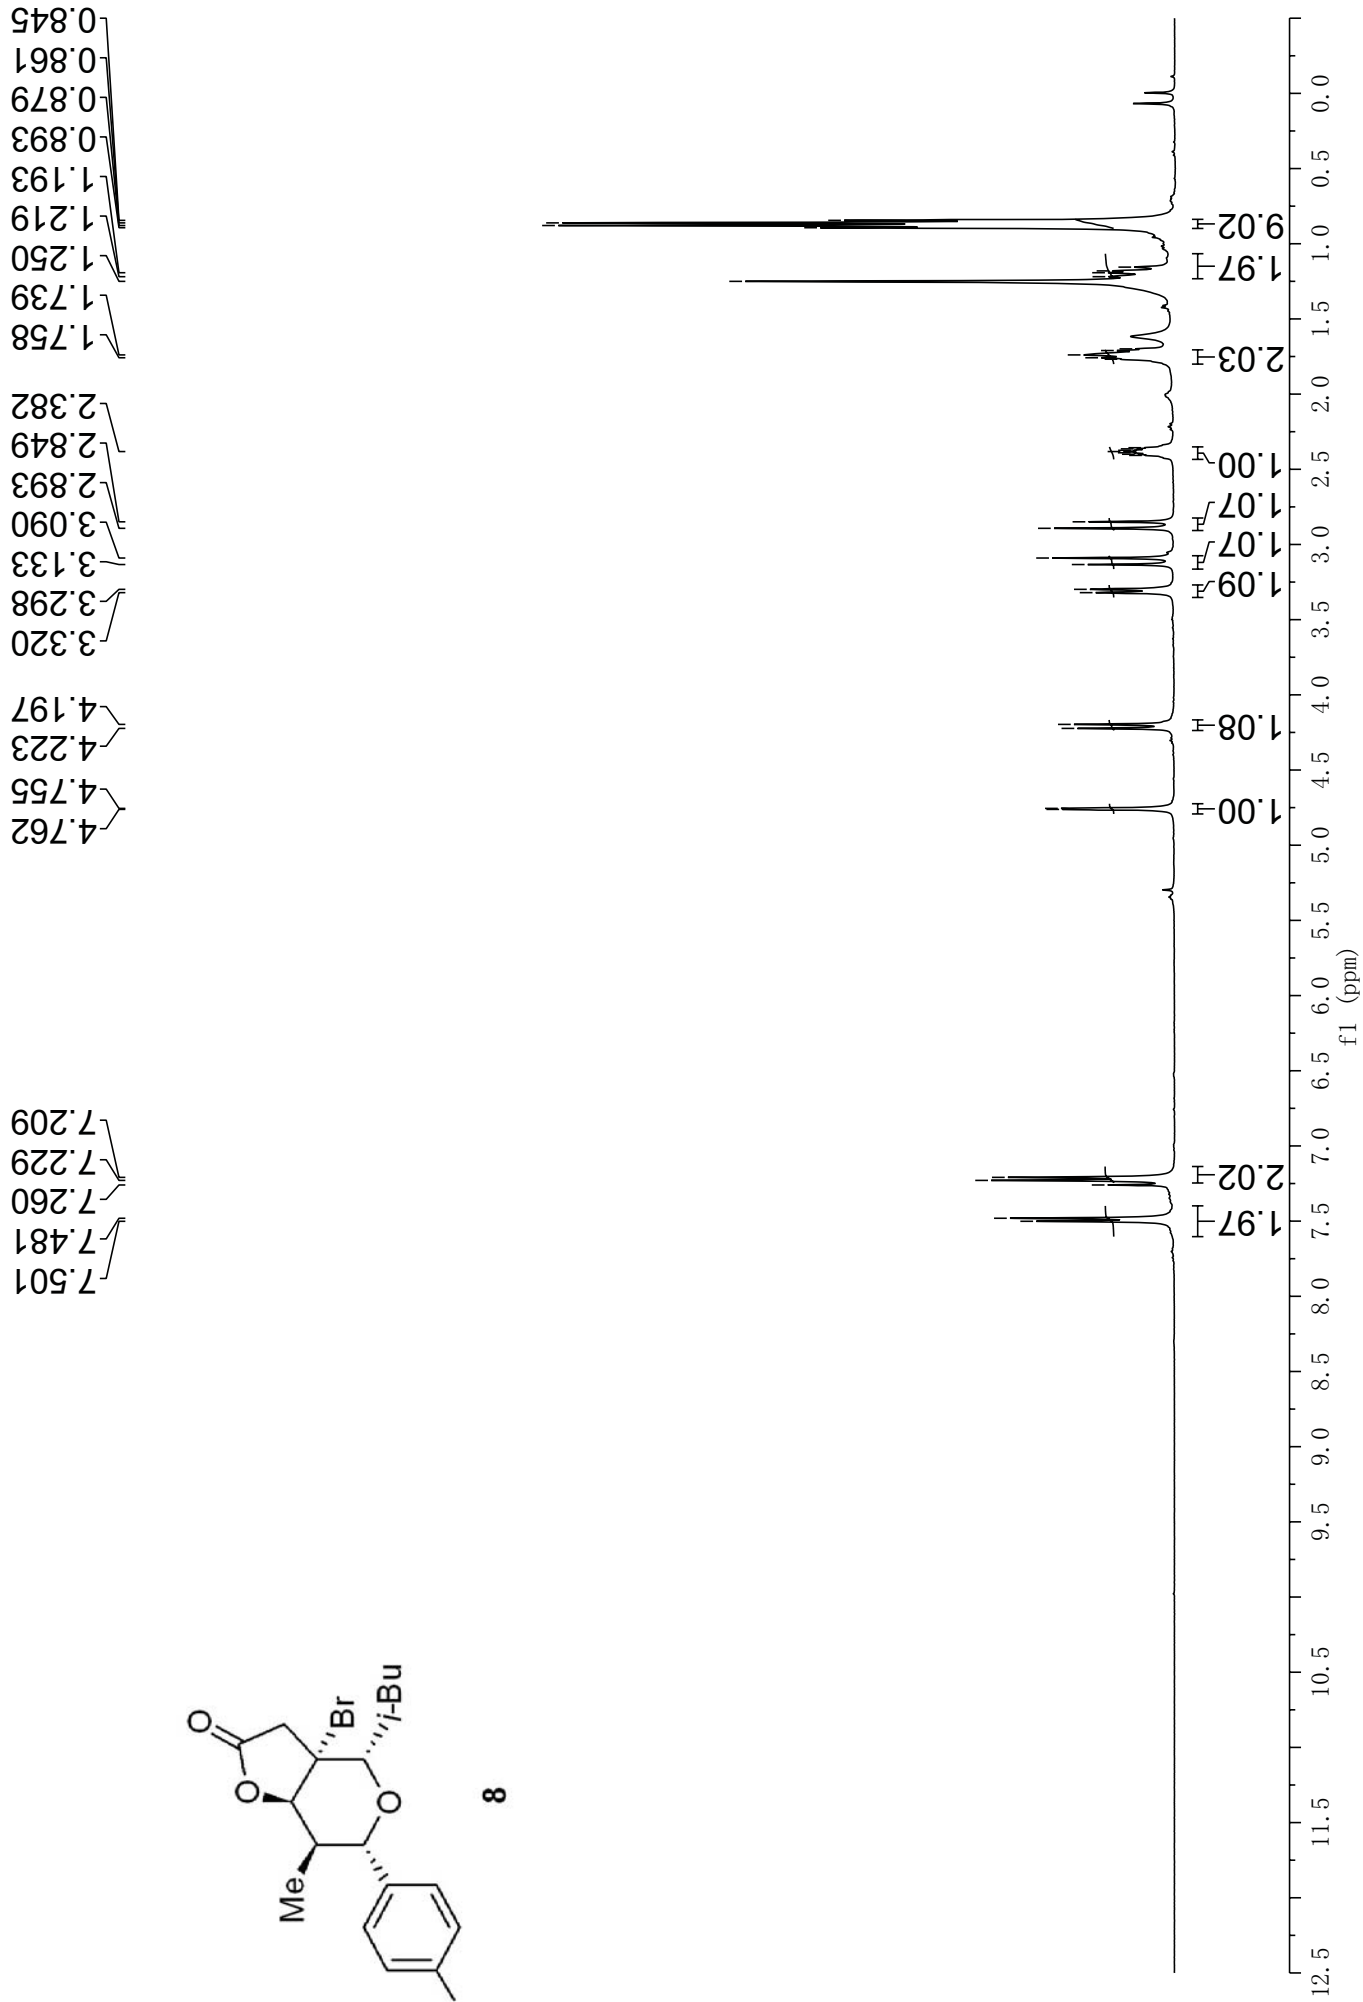

-172.404  
 ~138.323  
 ~131.546  
 ~128.884  
 ~122.156  
 87.682  
 80.356  
 77.211  
 77.000  
 76.788  
 76.726  
 -59.920  
 43.618  
 41.699  
 34.128  
 24.743  
 23.374  
 22.032  
 -13.023

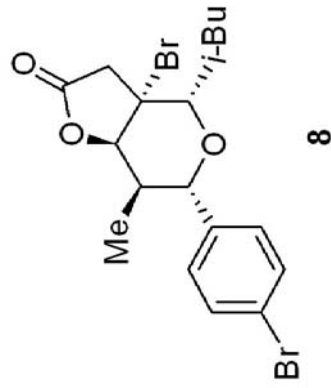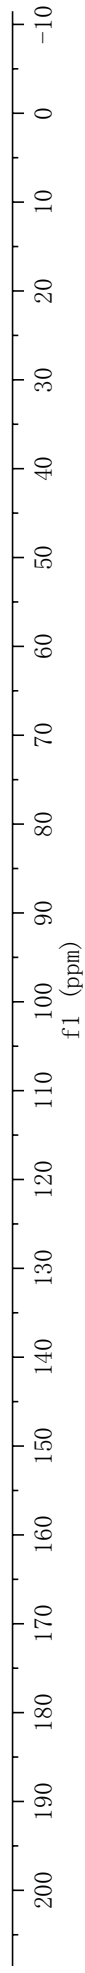

CHU-8-16Fa NOESY1D 2.38 CDCl3 600MHz

7.230  
7.216

4.764  
4.759  
4.223  
2.415  
2.410  
2.403  
2.398  
2.392  
2.386  
2.380  
2.374  
2.368  
2.362  
2.357  
0.881  
0.869

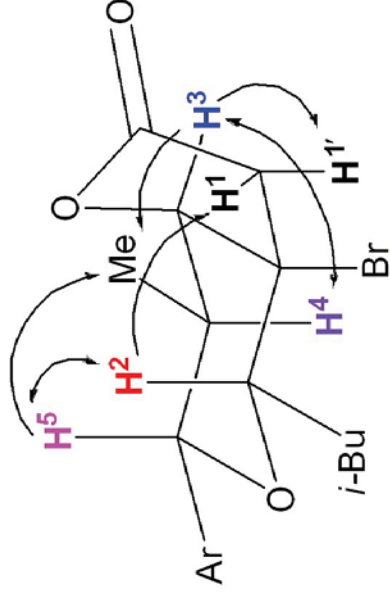

**8** (Ar = C<sub>6</sub>H<sub>4</sub>-p-Br)

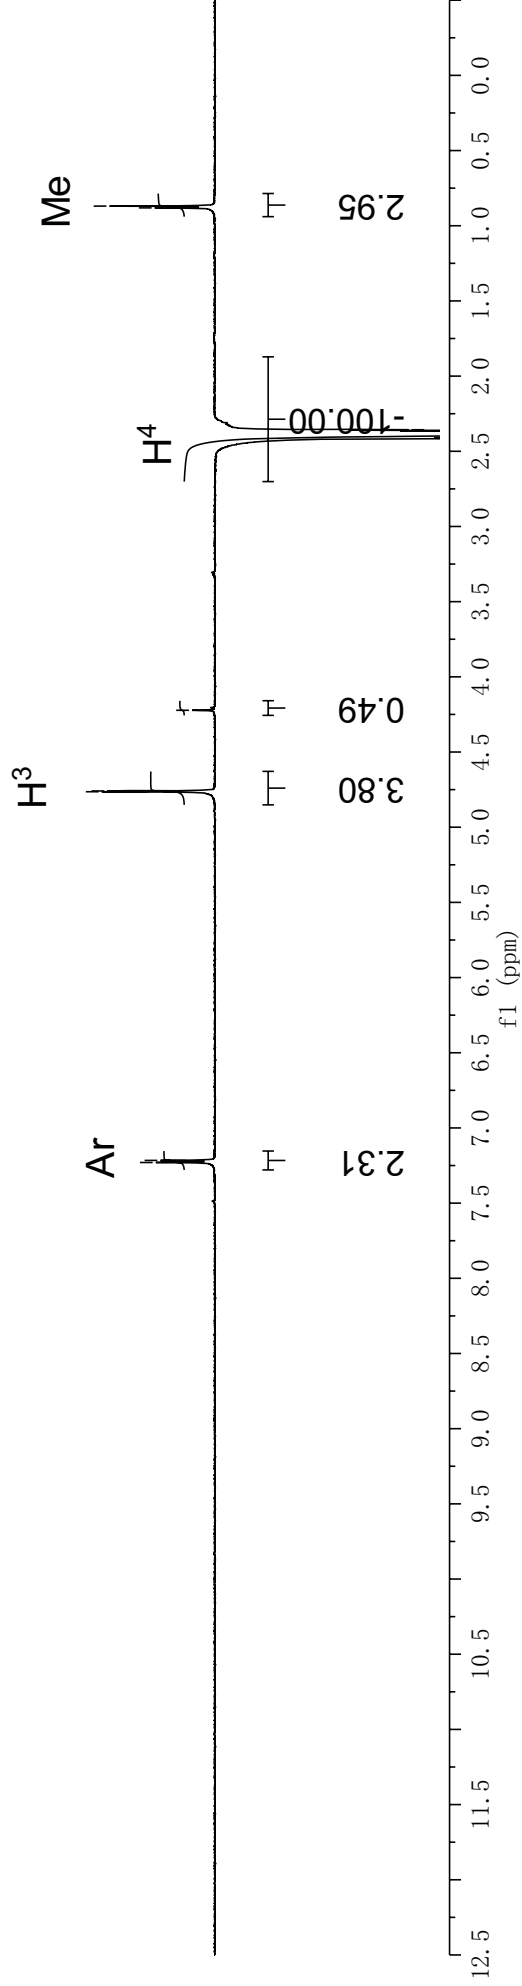

CHU-8-16Fa NOESY1D 3.31 CDCl3 600MHz

4.223  
4.205  
3.322  
3.307  
2.890  
2.861  
1.757  
1.744  
1.722  
1.209  
1.195  
1.189  
1.171  
0.895  
0.884  
0.862  
0.851

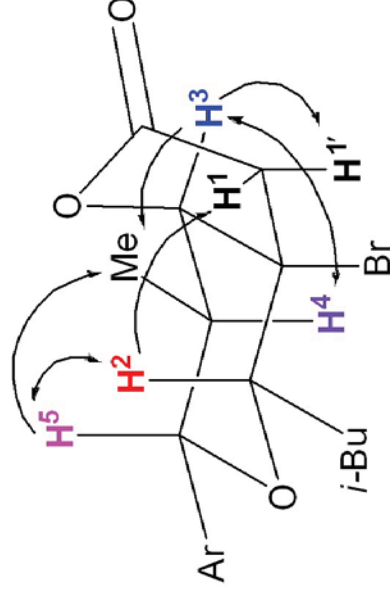

**8** (Ar = C<sub>6</sub>H<sub>4</sub>-*p*-Br)

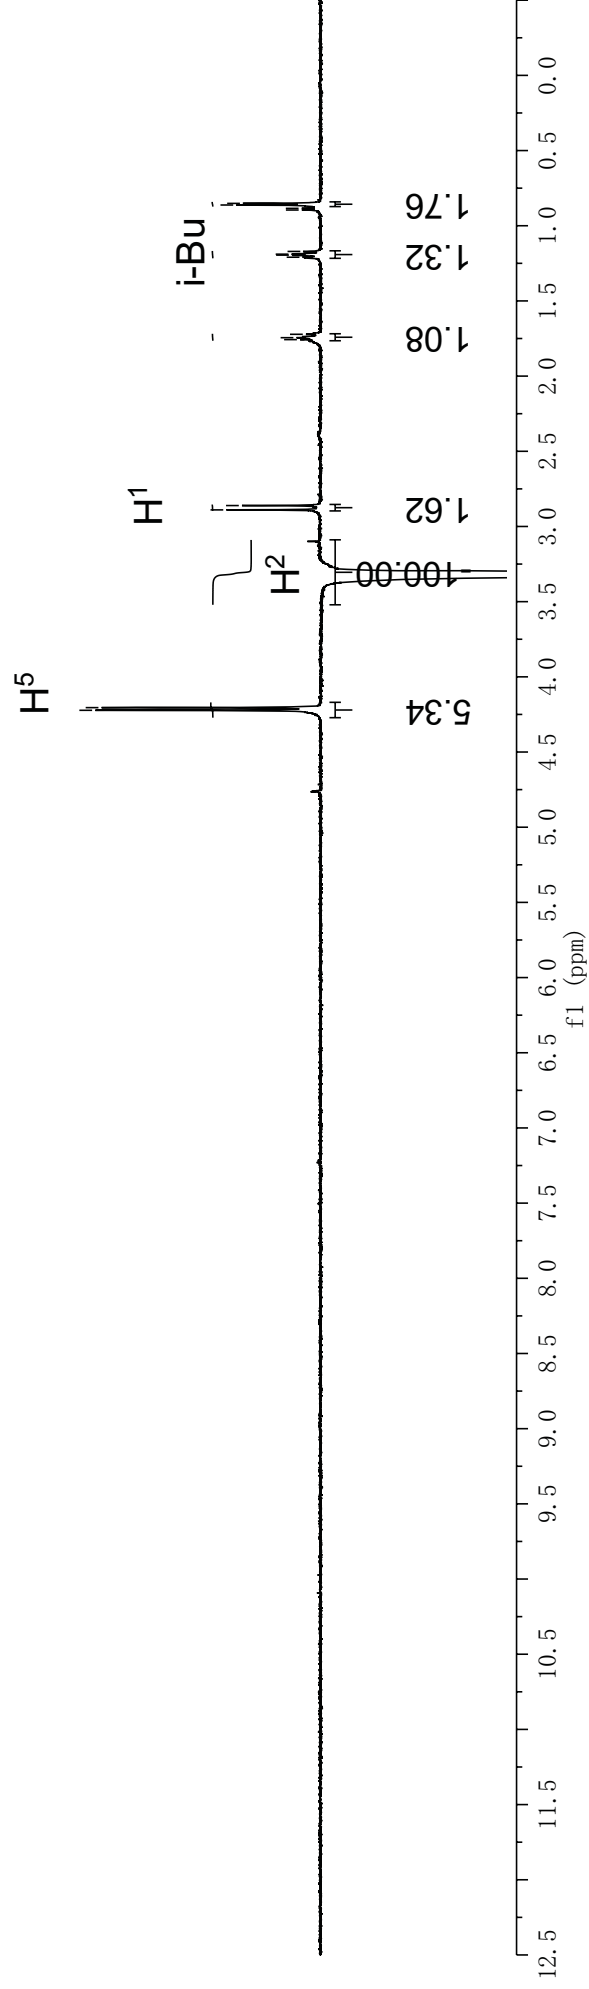

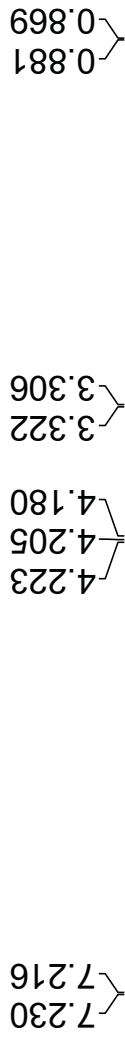

**8** (Ar = C<sub>6</sub>H<sub>4</sub>-p-Br)

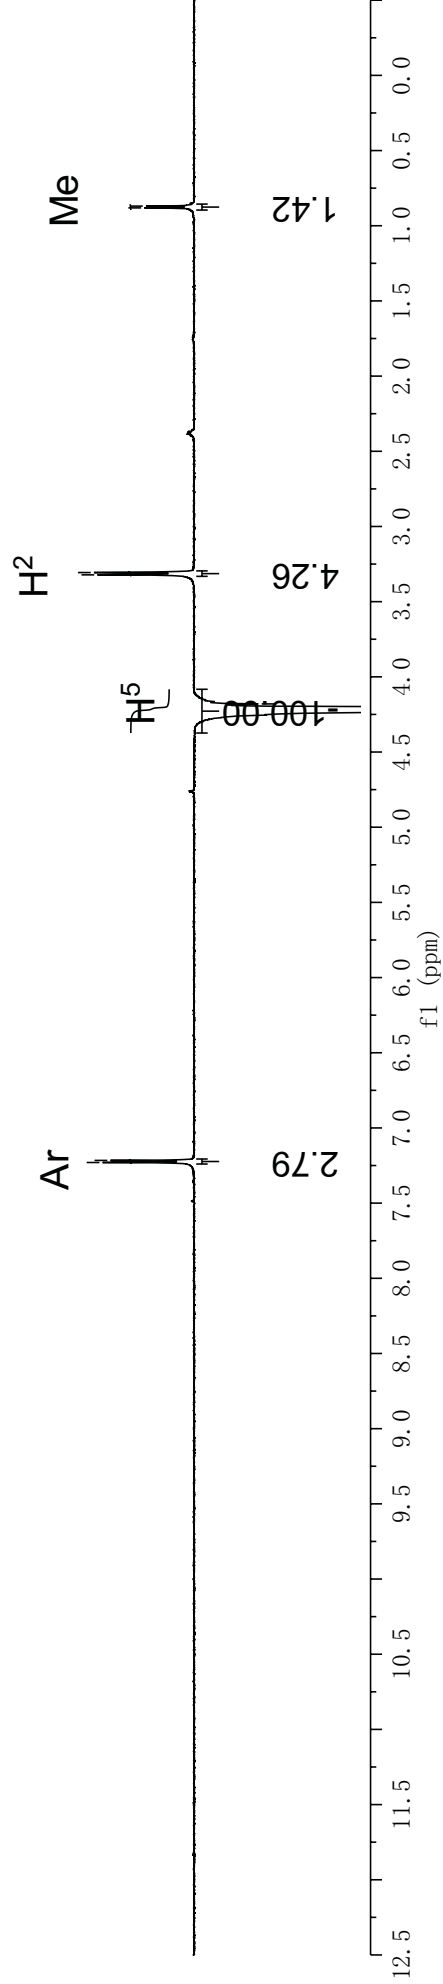



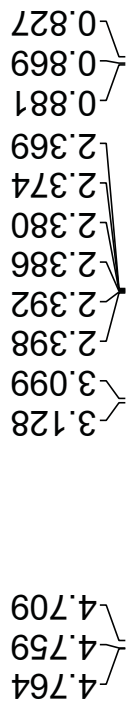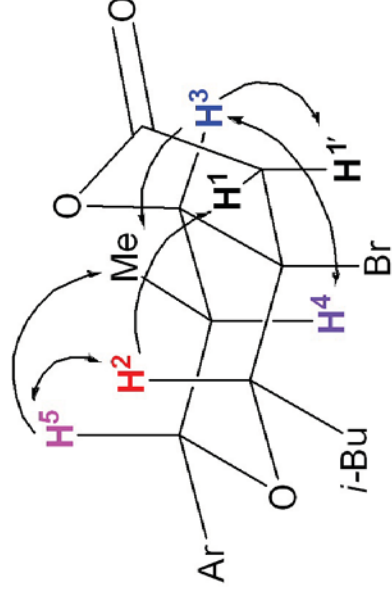

**8** (Ar = C<sub>6</sub>H<sub>4</sub>-p-Br)

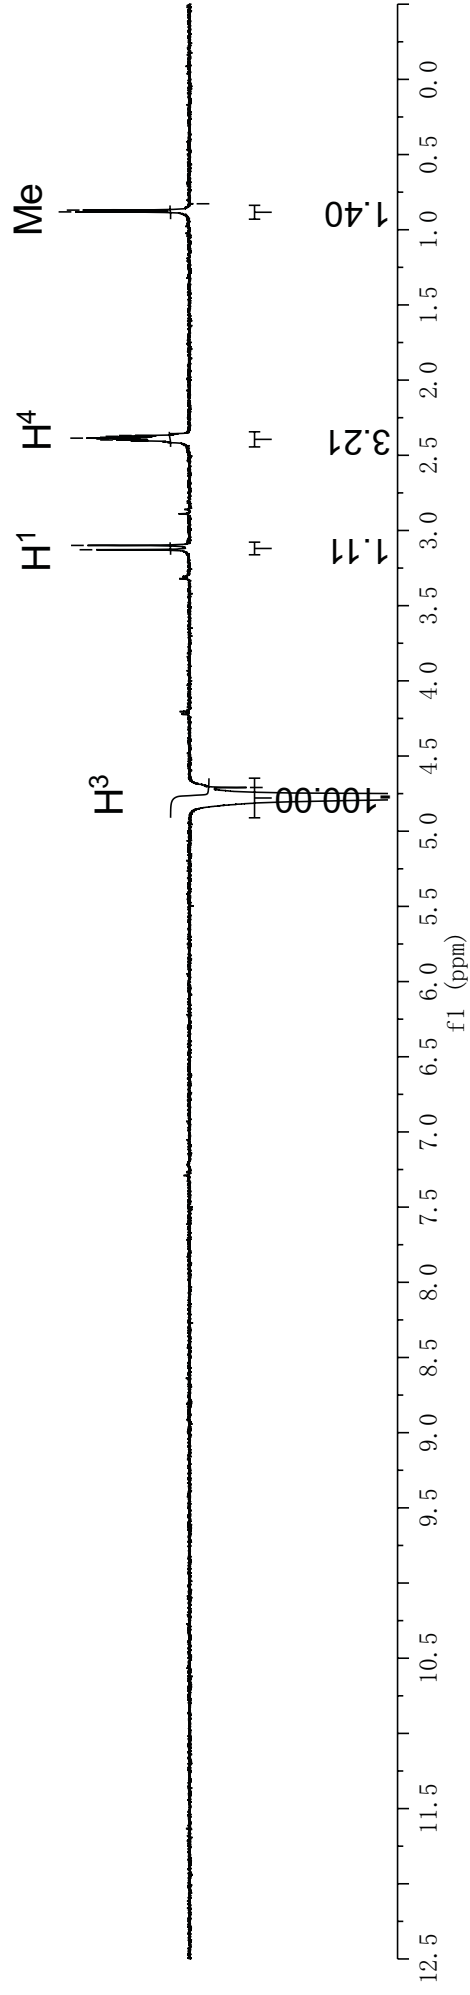

CHU-8-9F1PB H1 CDCl3 400MHZ

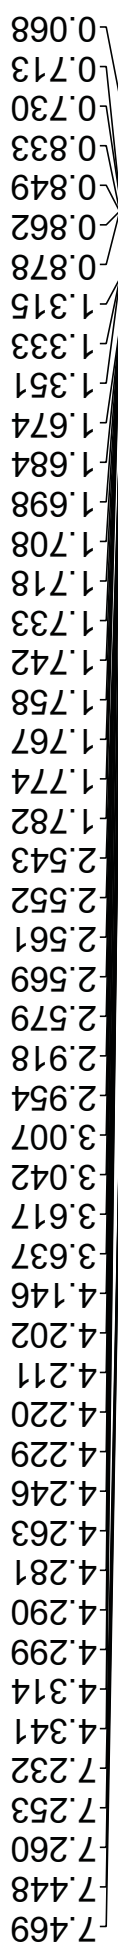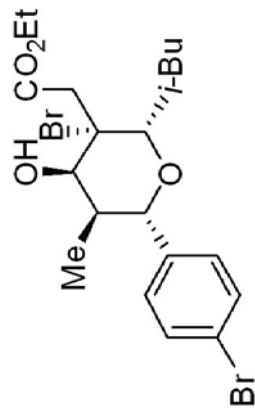

9

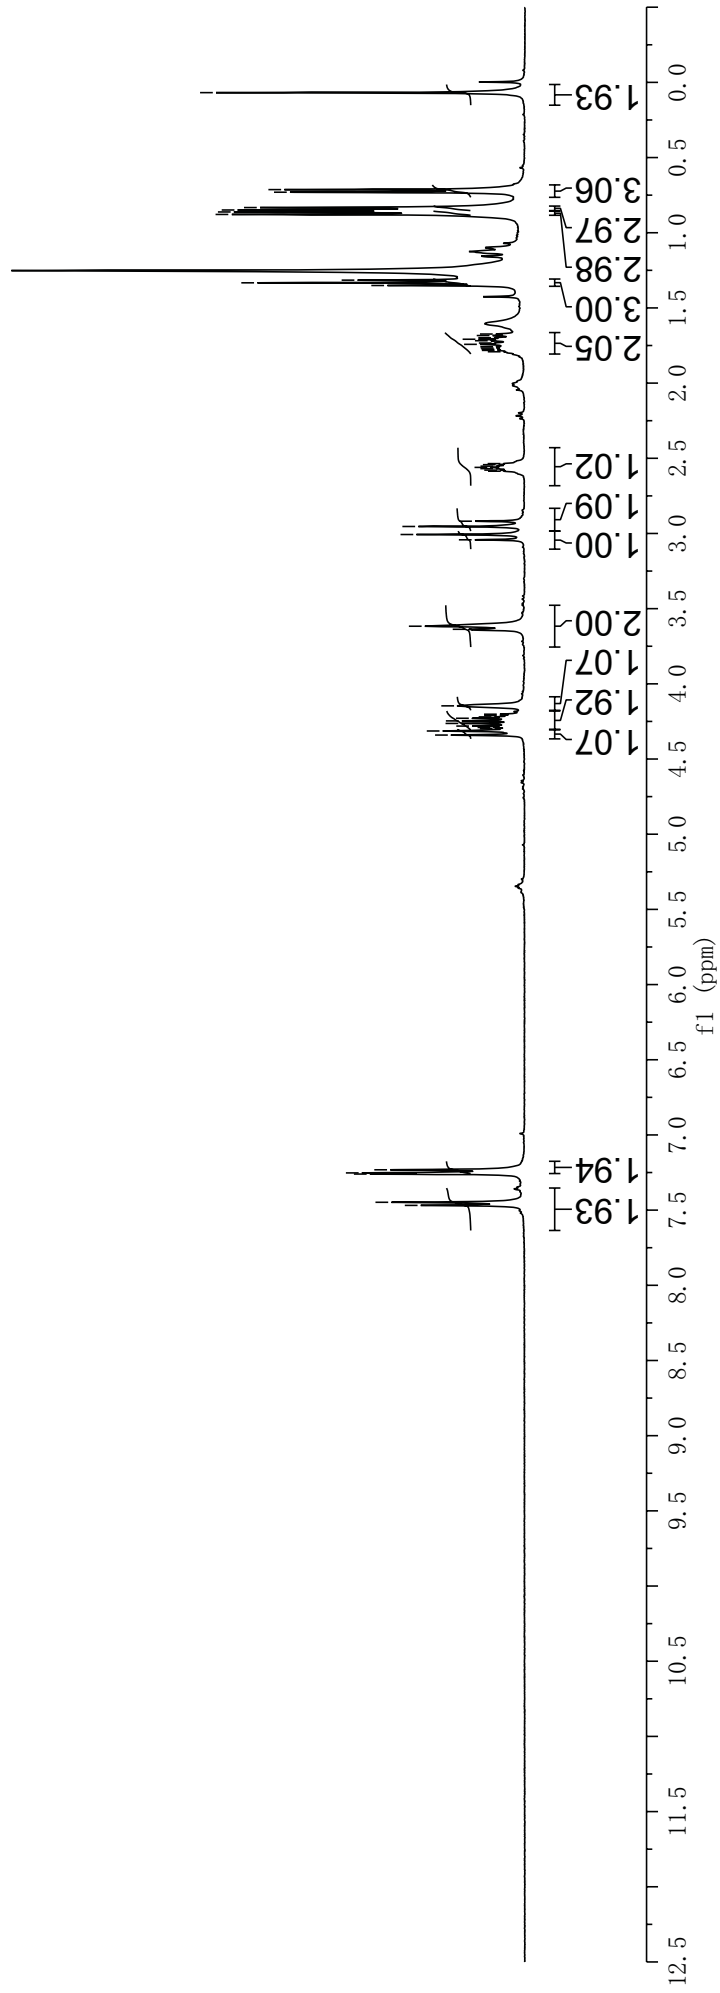

CHU-8-17FPB C13 CDCI3  
400MHZ

170.981

139.994  
131.262  
129.090  
121.513

80.030  
77.317  
77.000  
76.683  
75.852  
74.819  
70.487  
61.603

42.494  
40.398  
36.741

24.218  
23.642  
21.834  
14.186  
13.728



9

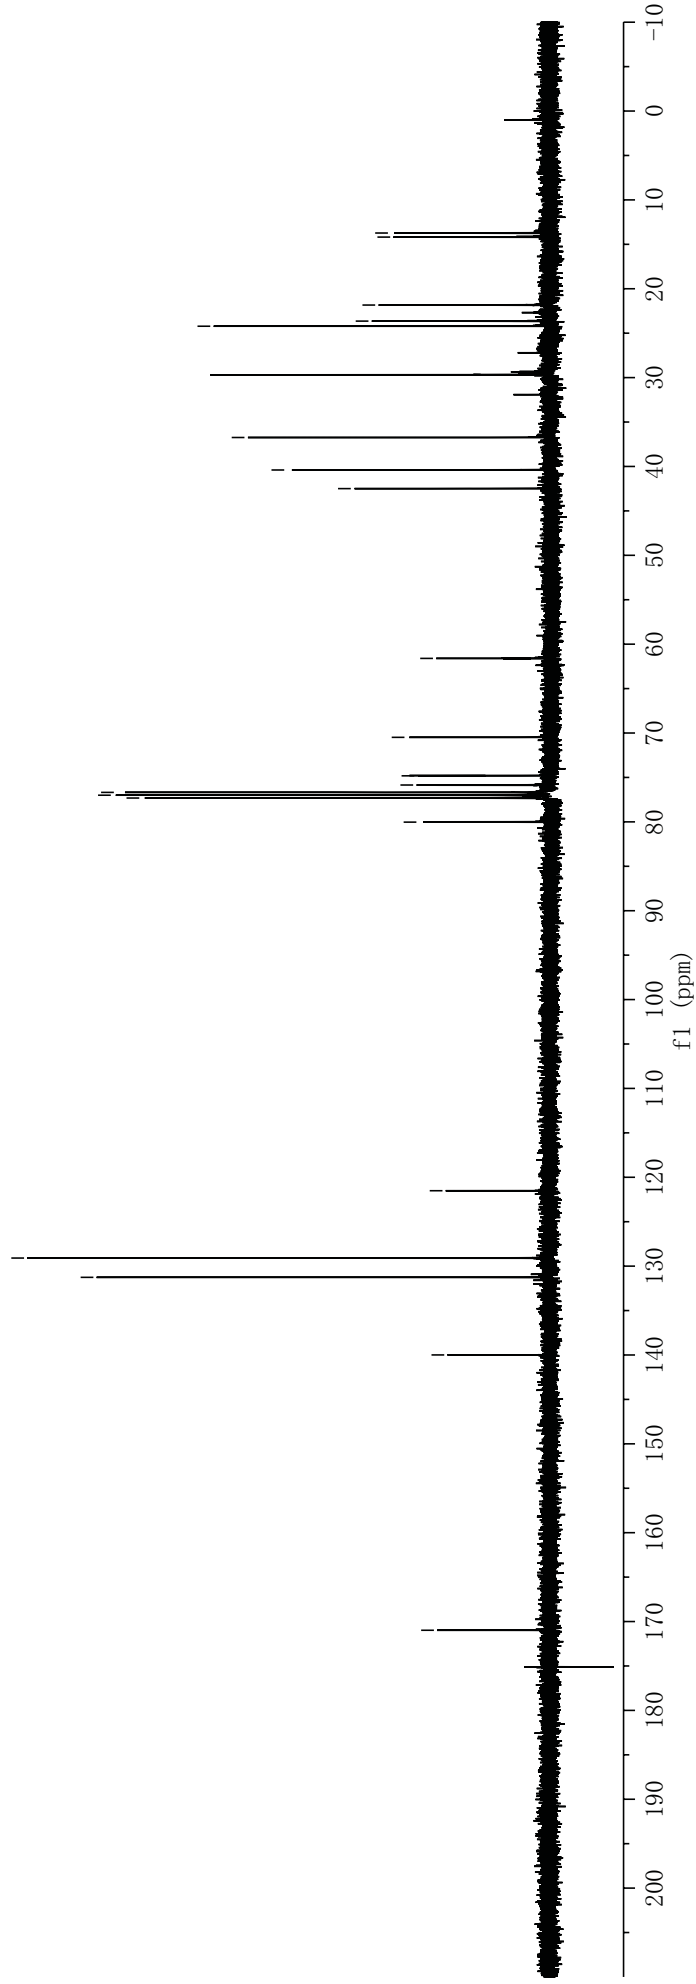

CHU-8-17FPB2 NOESY1D 2.56 CDCl3 600MHz

7.252  
7.238

4.339  
4.157  
4.152  
4.148  
4.143

2.592  
2.587  
2.580  
2.575  
2.569  
2.563  
2.558  
2.551  
2.546  
0.731  
0.719

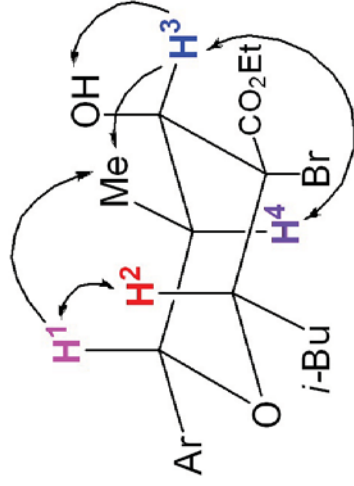

**9** (Ar = C<sub>6</sub>H<sub>4</sub>-*p*-Br)

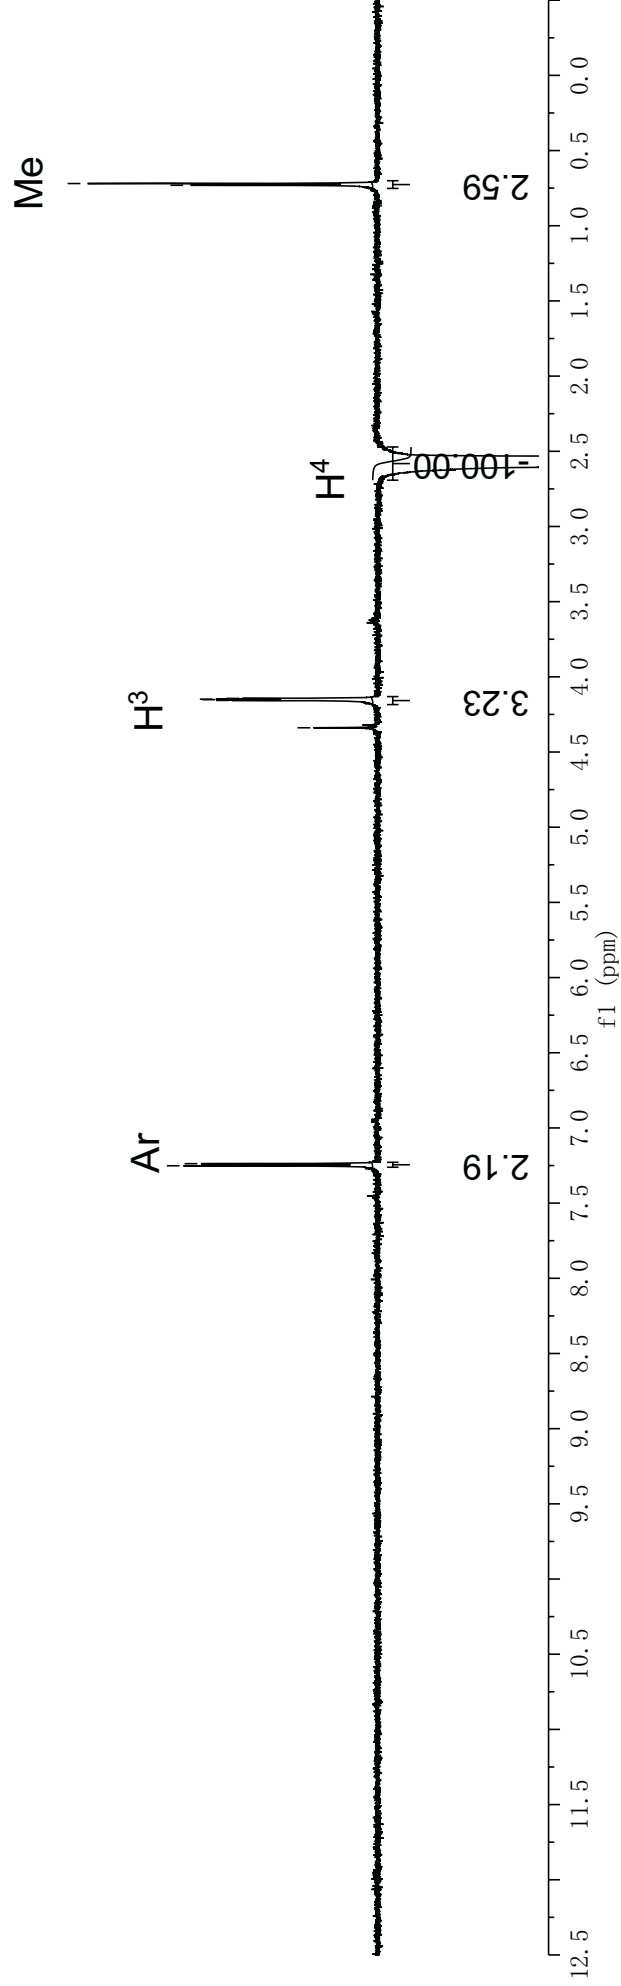

4.339  
4.321  
3.636  
3.624  
3.037  
3.013  
2.952  
-1.611  
0.849  
0.838



**9** ( $\text{Ar} = \text{C}_6\text{H}_4\text{-}p\text{-Br}$ )

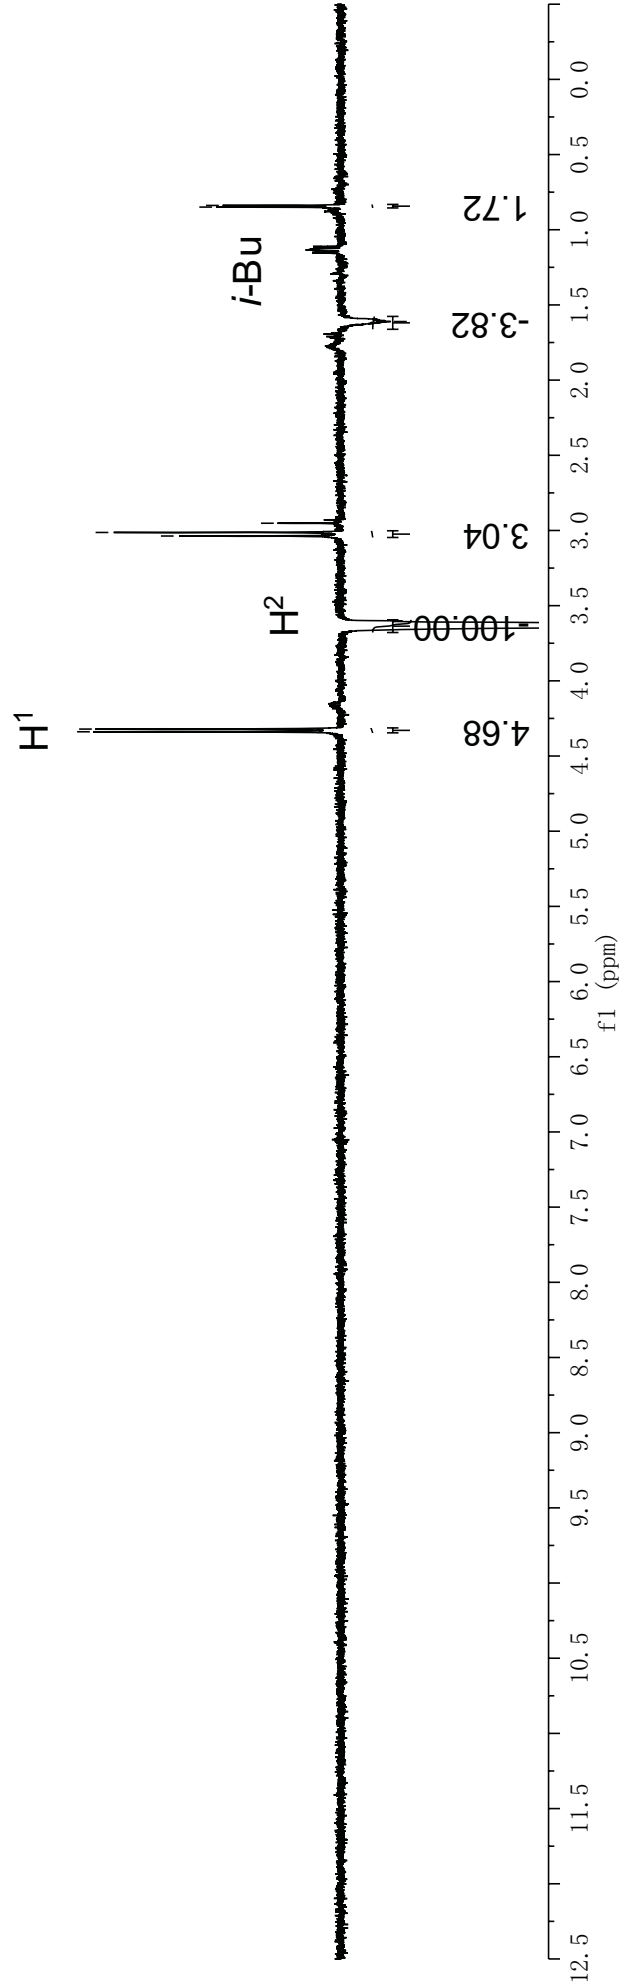

0.731  
0.719

4.157  
4.152  
4.148  
4.143  
4.136  
4.129  
4.124  
4.117  
3.610  
3.601

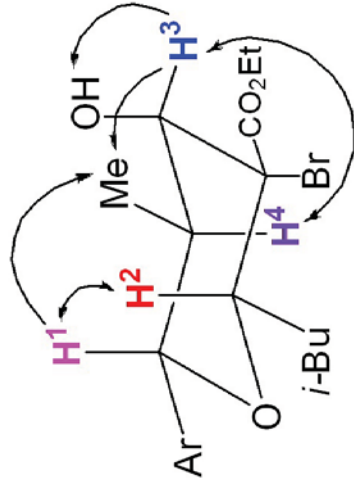

**9** (Ar = C<sub>6</sub>H<sub>4</sub>-*p*-Br)

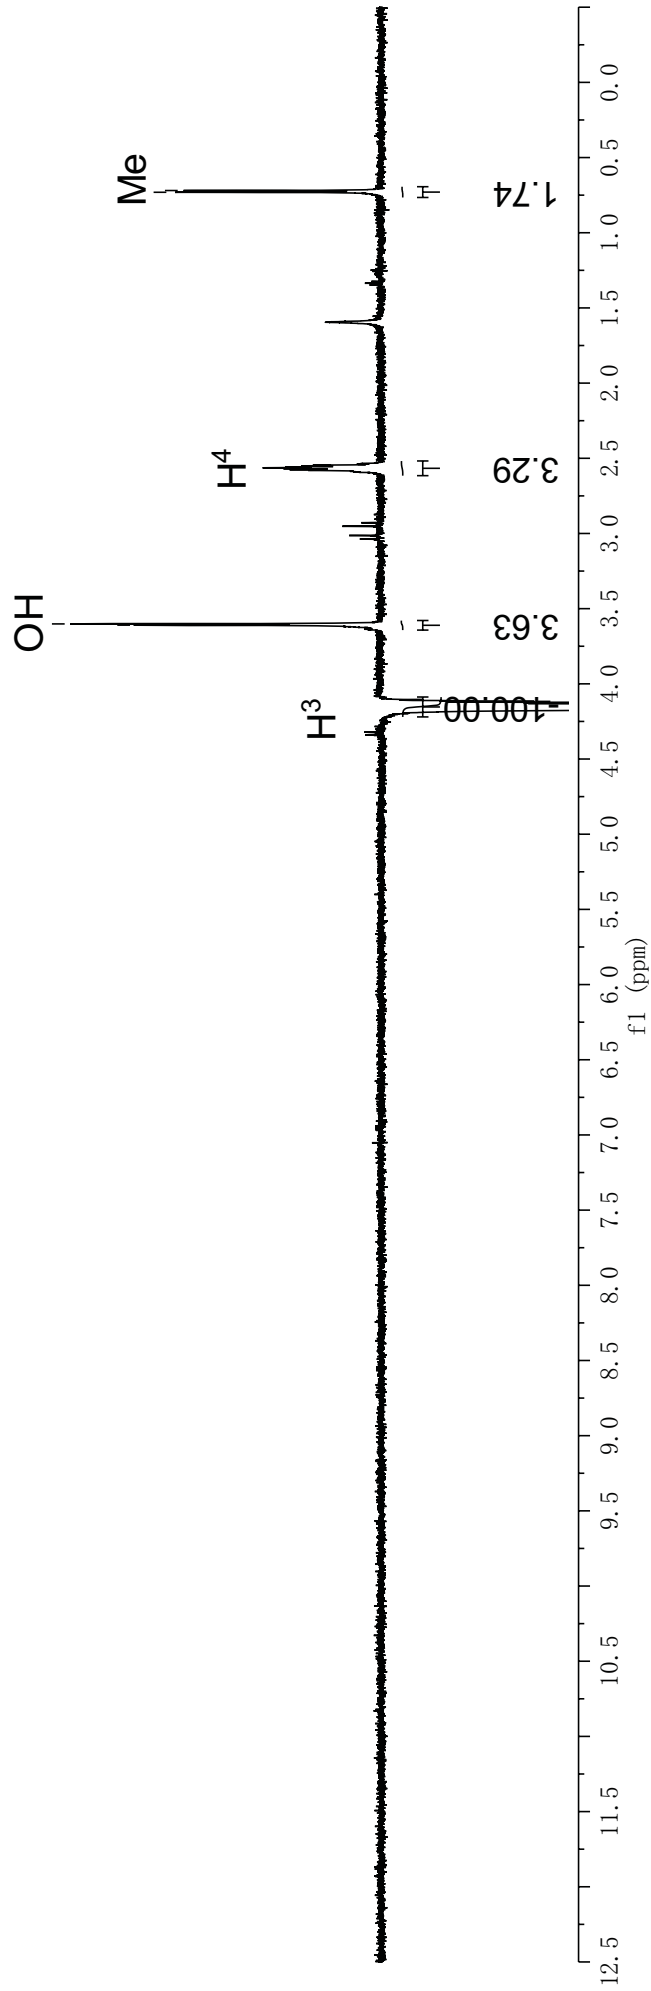

7.251  
7.238  
7.052

4.339  
4.321  
3.637  
3.624

2.580  
2.546

1.932

0.731  
0.719

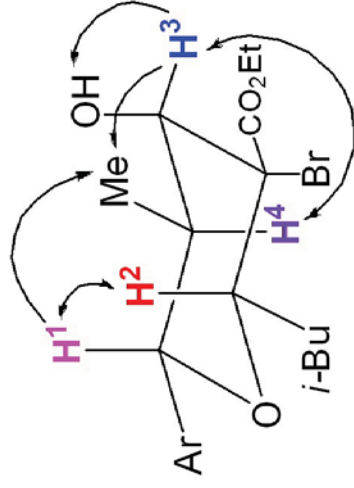

**9** (Ar = C<sub>6</sub>H<sub>4</sub>-p-Br)

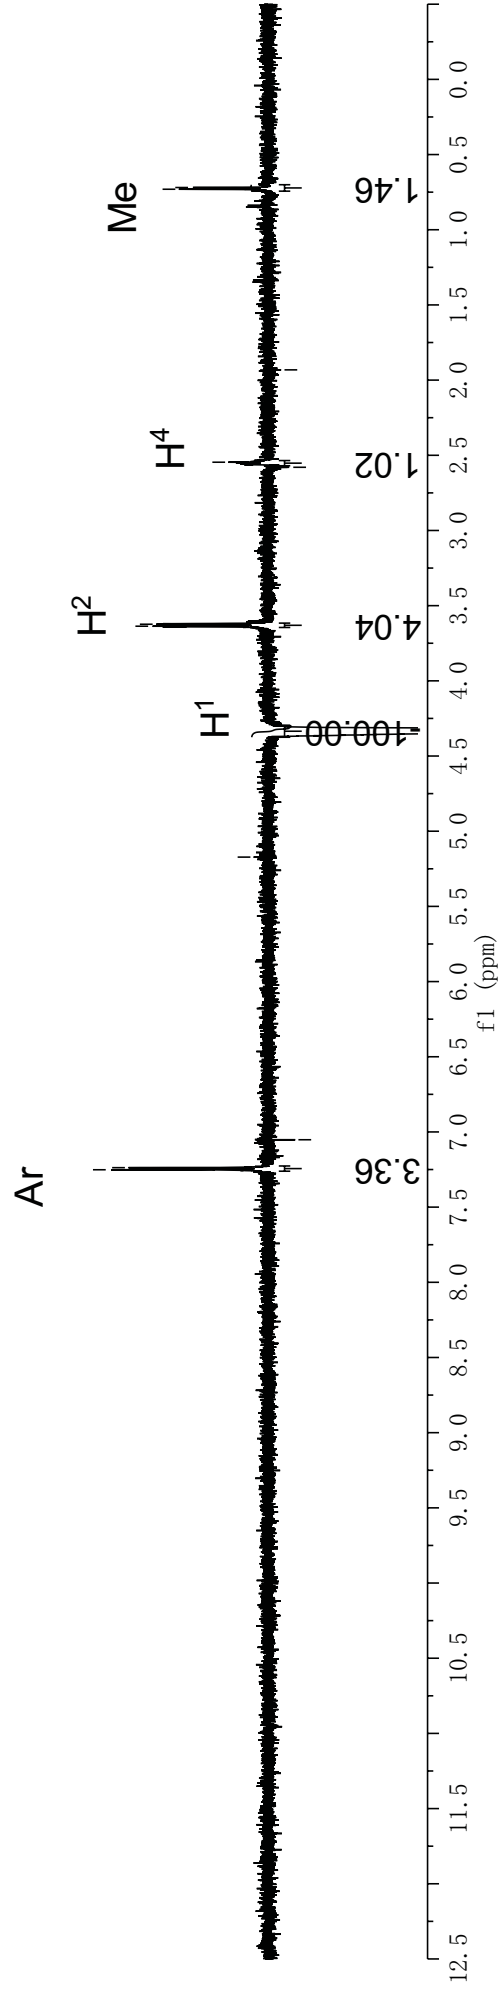

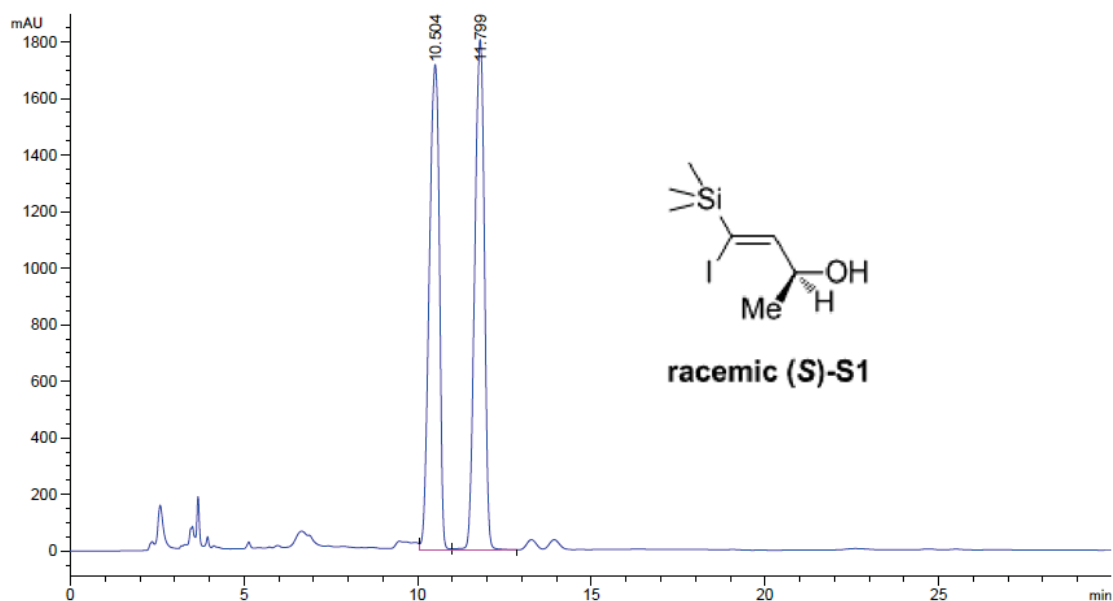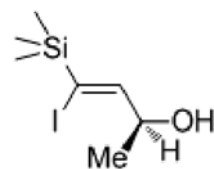

racemic (S)-S1

| Peak # | RetTime [min] | Type | Width [min] | Area mAU  | Area %  |
|--------|---------------|------|-------------|-----------|---------|
| 1      | 10.504        | VV   | 0.3328      | 3.46118e4 | 49.7797 |
| 2      | 11.799        | VV   | 0.3146      | 3.49182e4 | 50.2203 |

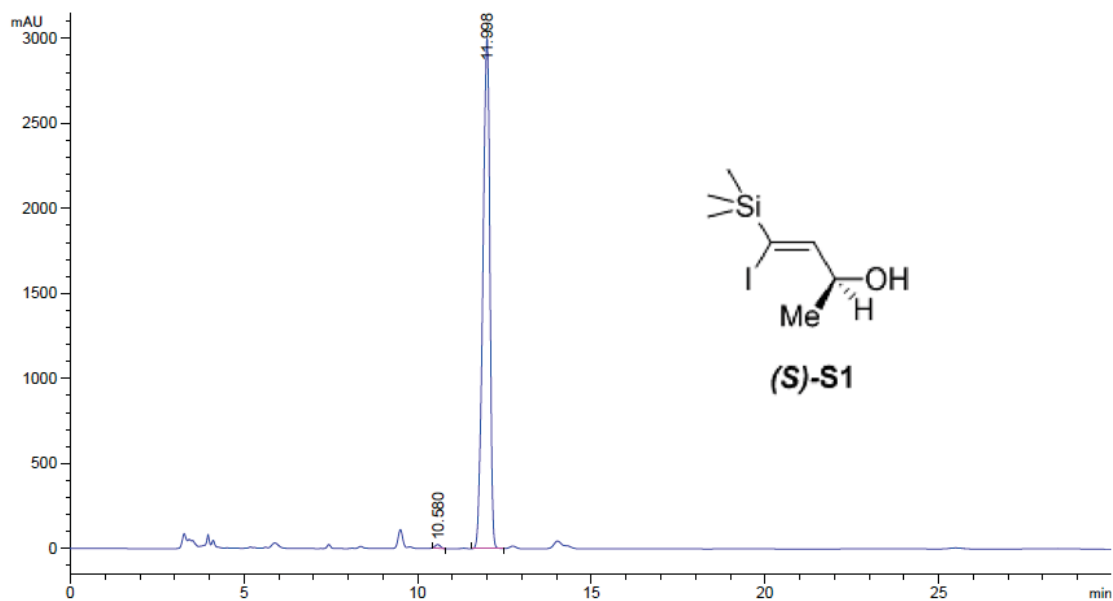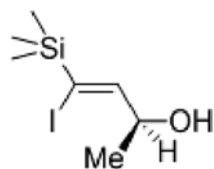

(S)-S1

| Peak # | RetTime [min] | Type | Width [min] | Area mAU  | Area %  |
|--------|---------------|------|-------------|-----------|---------|
| 1      | 10.580        | MM   | 0.1738      | 218.00398 | 0.5150  |
| 2      | 11.998        | VV   | 0.2204      | 4.21143e4 | 99.4850 |



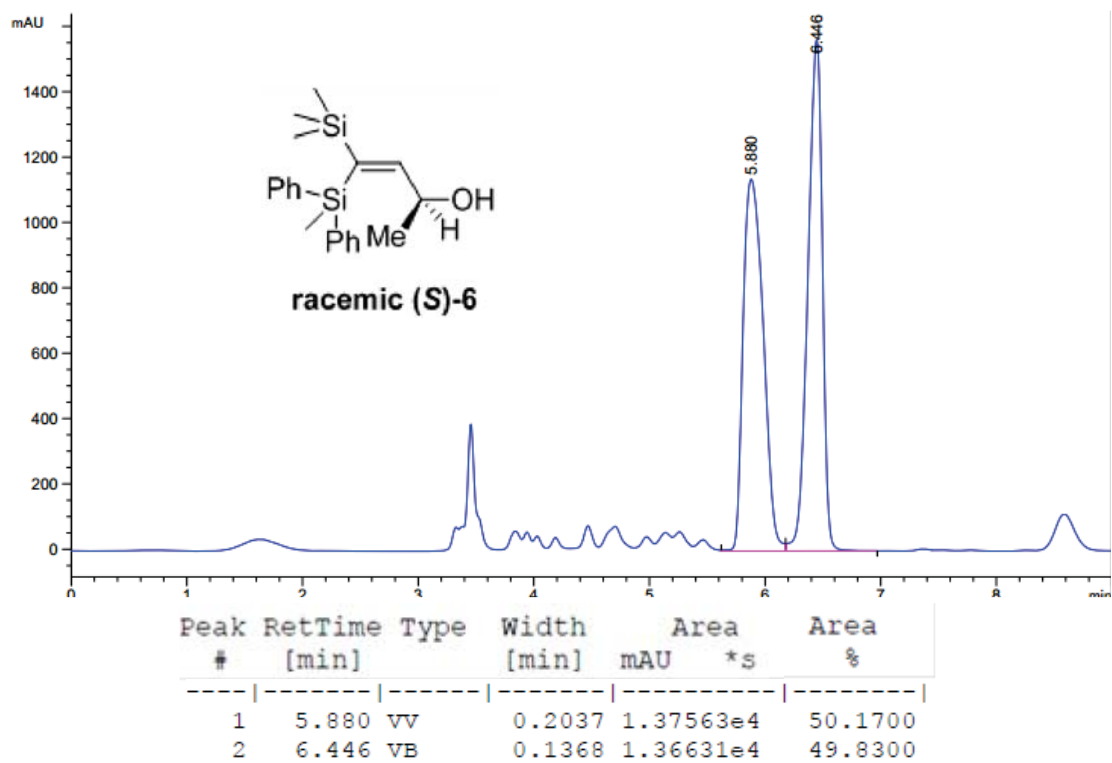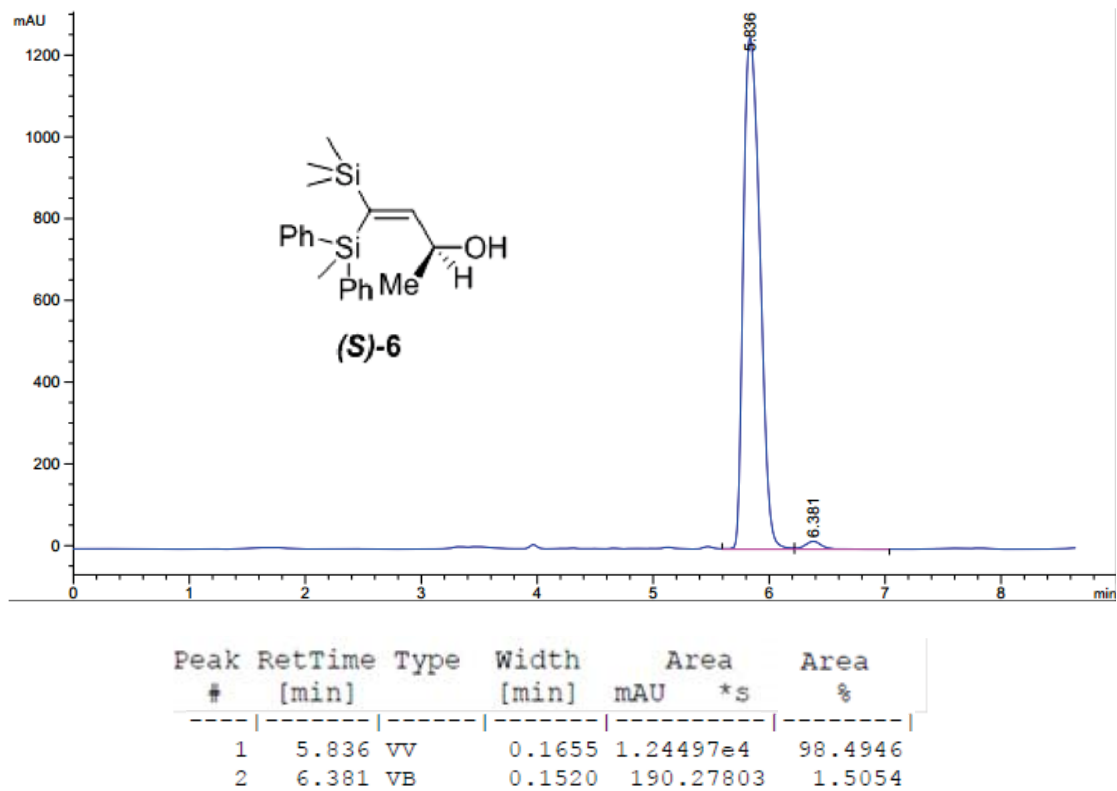

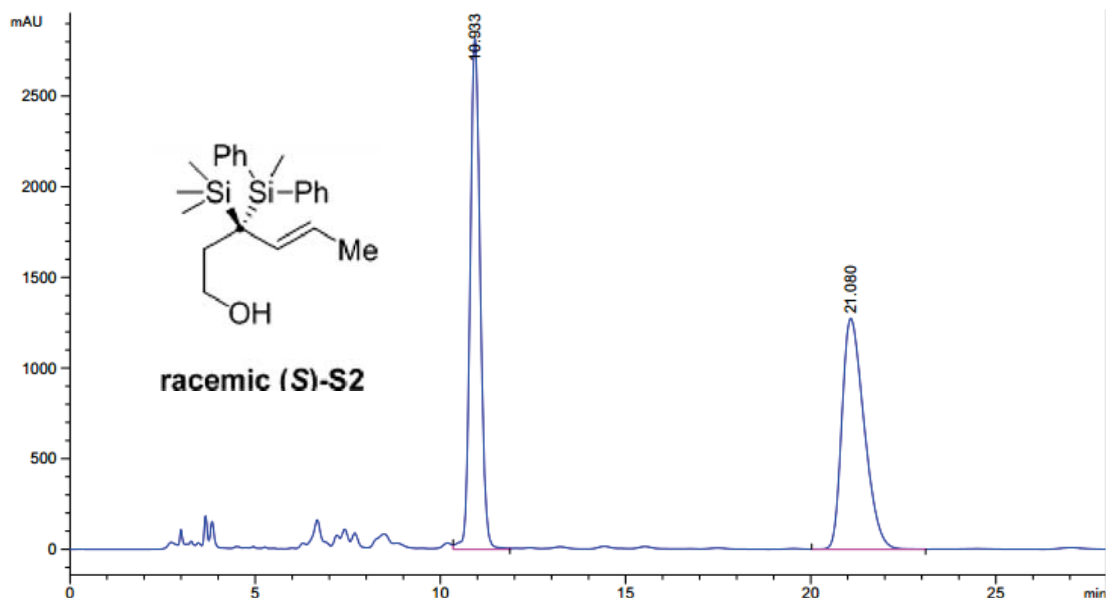

| Peak # | RetTime [min] | Type | Width [min] | Area mAU  | Area %  |
|--------|---------------|------|-------------|-----------|---------|
| 1      | 10.933        | VV   | 0.2952      | 5.33617e4 | 50.1110 |
| 2      | 21.080        | VB   | 0.6466      | 5.31253e4 | 49.8890 |

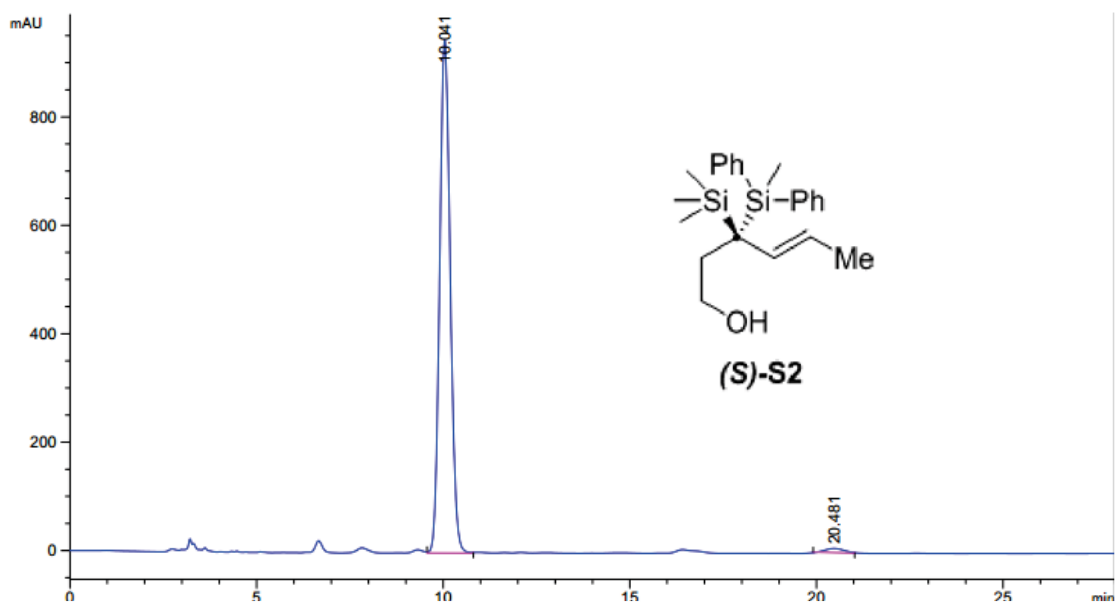

| Peak # | RetTime [min] | Type | Width [min] | Area mAU  | Area %  |
|--------|---------------|------|-------------|-----------|---------|
| 1      | 10.041        | VV   | 0.3068      | 1.86208e4 | 98.6136 |
| 2      | 20.481        | MM   | 0.5789      | 261.79694 | 1.3864  |

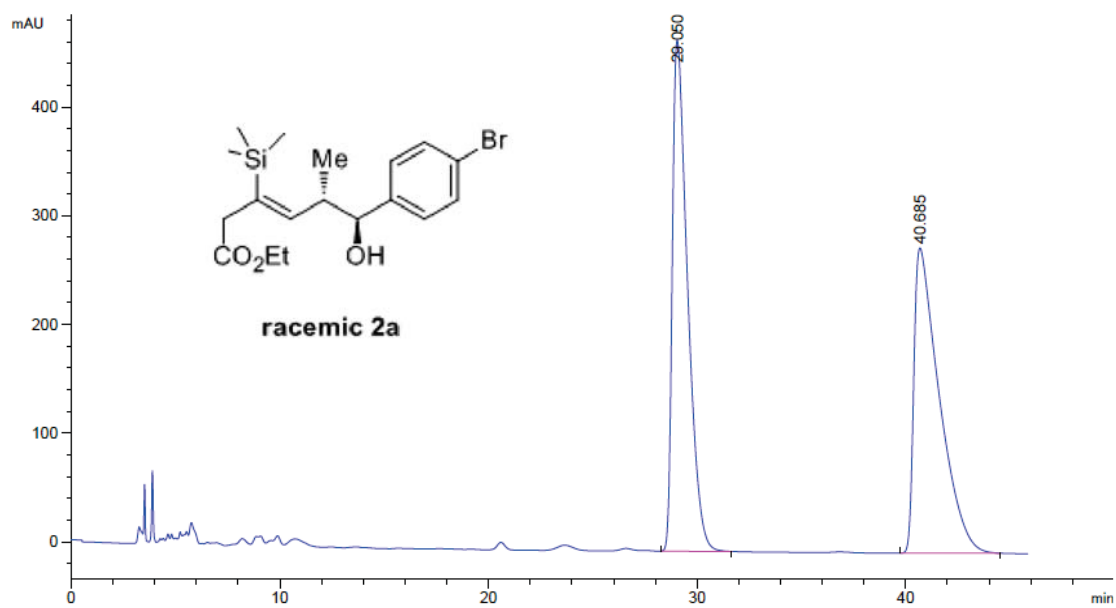

| Peak # | RetTime [min] | Type | Width [min] | Area mAU  | Area %  |
|--------|---------------|------|-------------|-----------|---------|
| 1      | 29.050        | BB   | 0.7564      | 2.37971e4 | 50.1296 |
| 2      | 40.685        | BB   | 1.2183      | 2.36740e4 | 49.8704 |

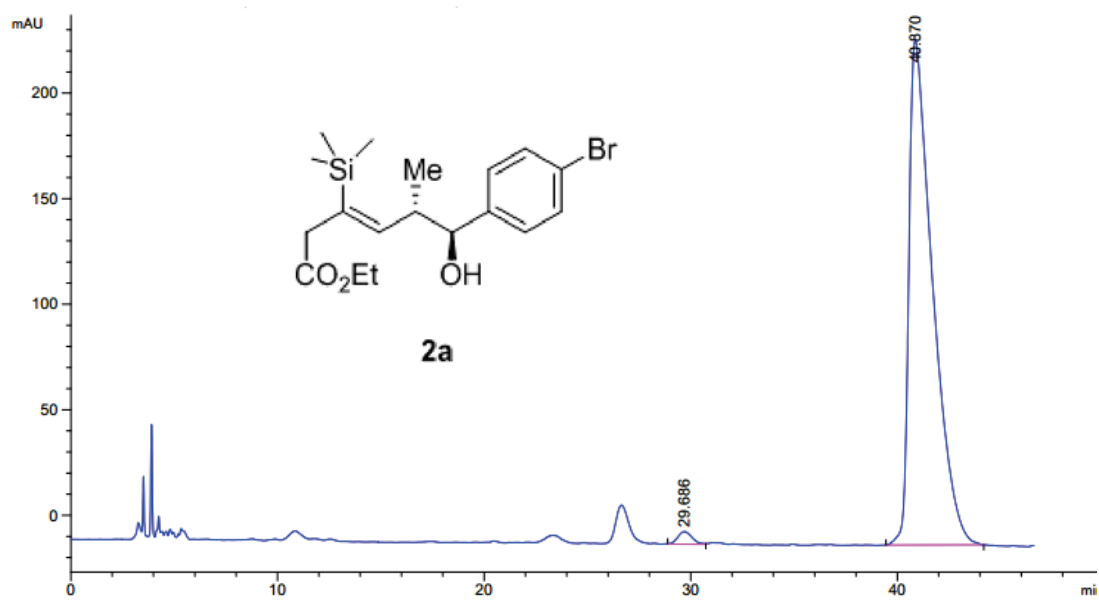

| Peak # | RetTime [min] | Type | Width [min] | Area mAU  | Area %  |
|--------|---------------|------|-------------|-----------|---------|
| 1      | 29.686        | BV   | 0.7531      | 285.48019 | 1.4747  |
| 2      | 40.870        | BB   | 1.1595      | 1.90737e4 | 98.5253 |

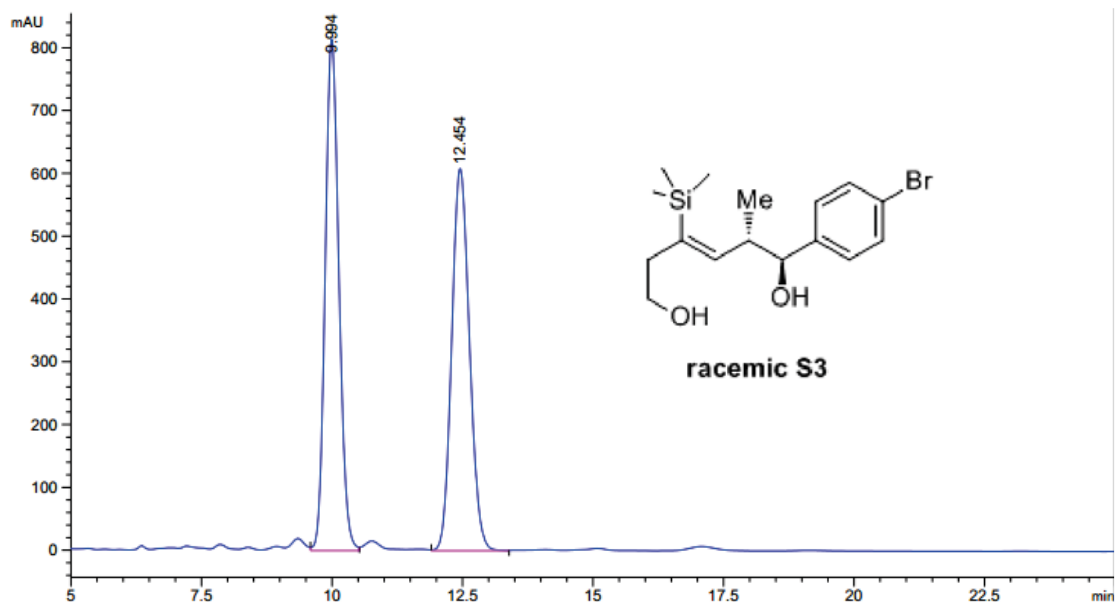

| Peak # | RetTime [min] | Type | Width [min] | Area mAU  | Area %  |
|--------|---------------|------|-------------|-----------|---------|
| 1      | 9.994         | VV   | 0.2826      | 1.48409e4 | 50.8366 |
| 2      | 12.454        | VB   | 0.3685      | 1.43524e4 | 49.1634 |

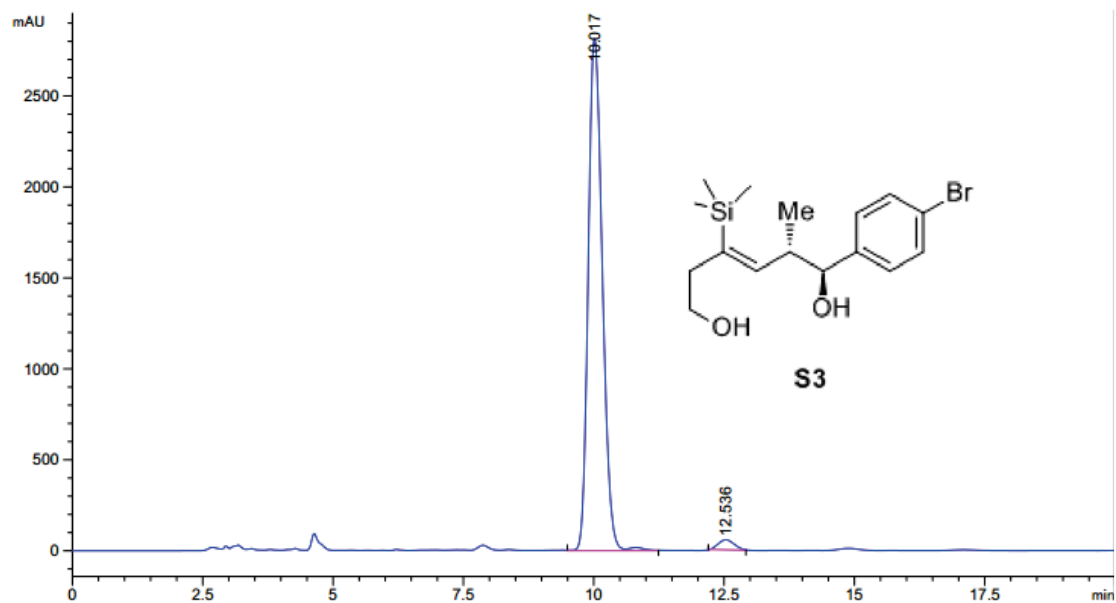

| Peak # | RetTime [min] | Type | Width [min] | Area mAU   | Area %  |
|--------|---------------|------|-------------|------------|---------|
| 1      | 10.017        | MM   | 0.3142      | 5.30518e4  | 97.8469 |
| 2      | 12.536        | MM   | 0.3549      | 1167.37891 | 2.1531  |

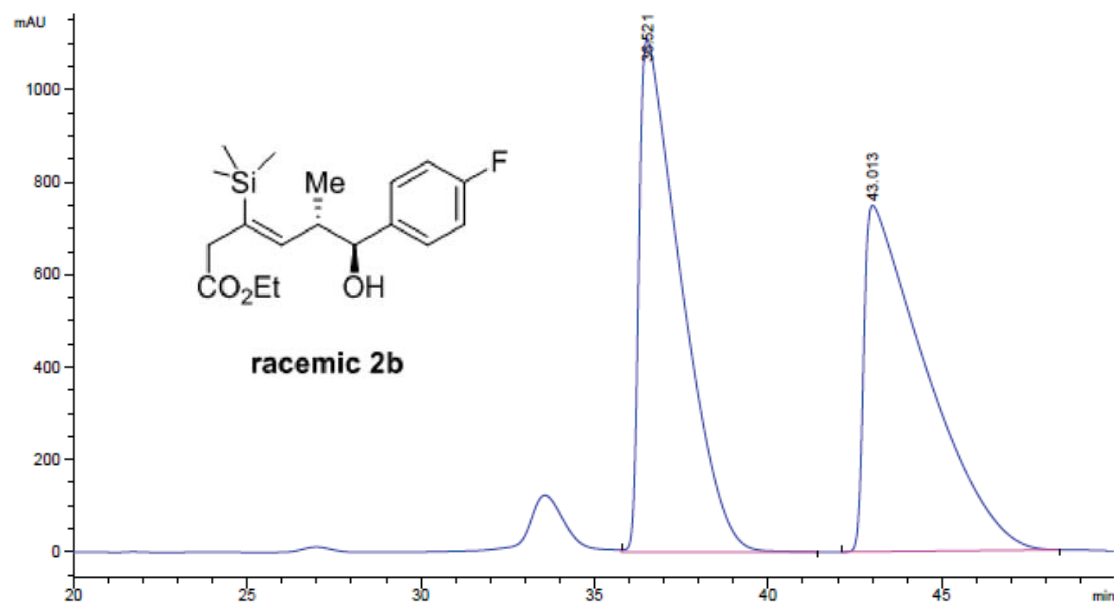

| Peak # | RetTime [min] | Type | Width [min] | Area mAU  | Area *s | Area %  |
|--------|---------------|------|-------------|-----------|---------|---------|
| 1      | 36.521        | VB   | 1.2136      | 9.30604e4 |         | 49.9835 |
| 2      | 43.013        | BB   | 1.7053      | 9.31219e4 |         | 50.0165 |

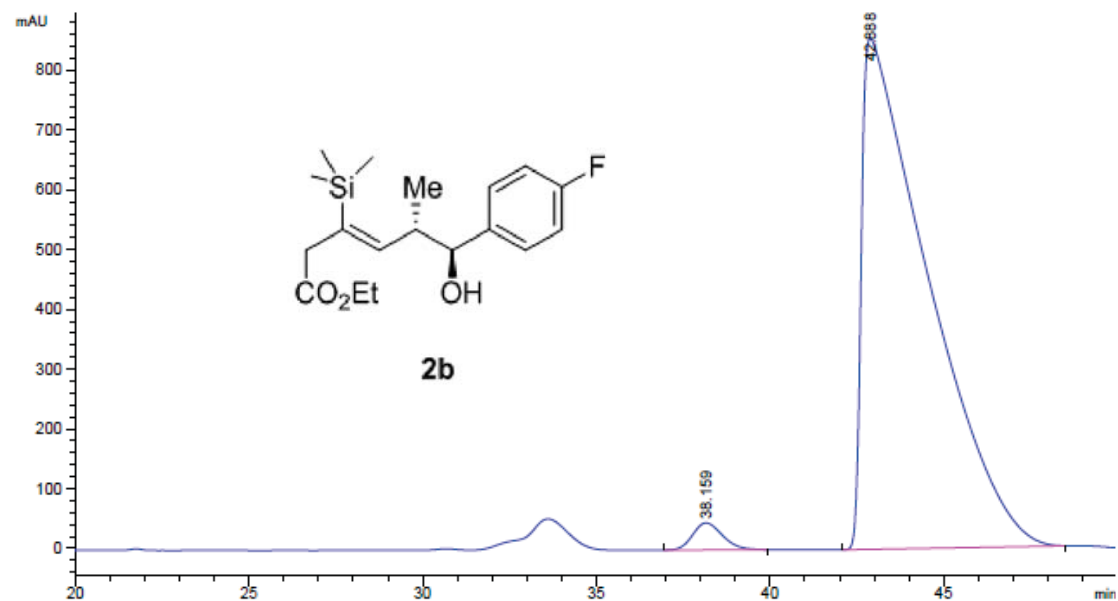

| Peak # | RetTime [min] | Type | Width [min] | Area mAU   | Area *s | Area %  |
|--------|---------------|------|-------------|------------|---------|---------|
| 1      | 38.159        | BB   | 0.9235      | 2704.07227 |         | 2.3186  |
| 2      | 42.888        | BB   | 1.8291      | 1.13921e5  |         | 97.6814 |

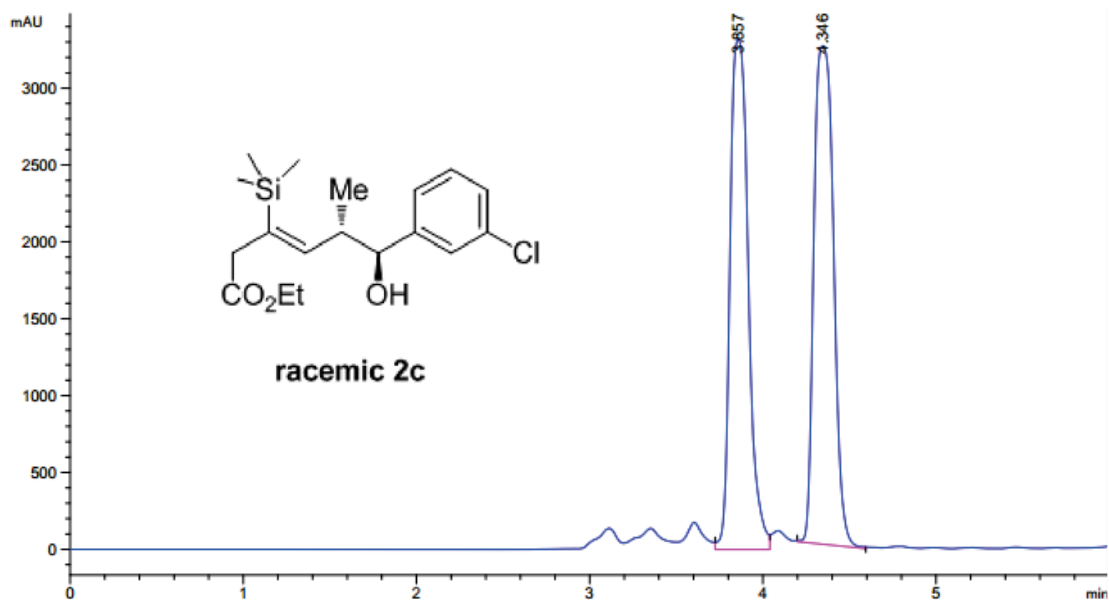

| Peak # | RetTime [min] | Type | Width [min] | Area mAU  | Area %  |
|--------|---------------|------|-------------|-----------|---------|
| 1      | 3.857         | VV   | 0.1174      | 2.42958e4 | 48.0060 |
| 2      | 4.346         | VV   | 0.1301      | 2.63141e4 | 51.9940 |

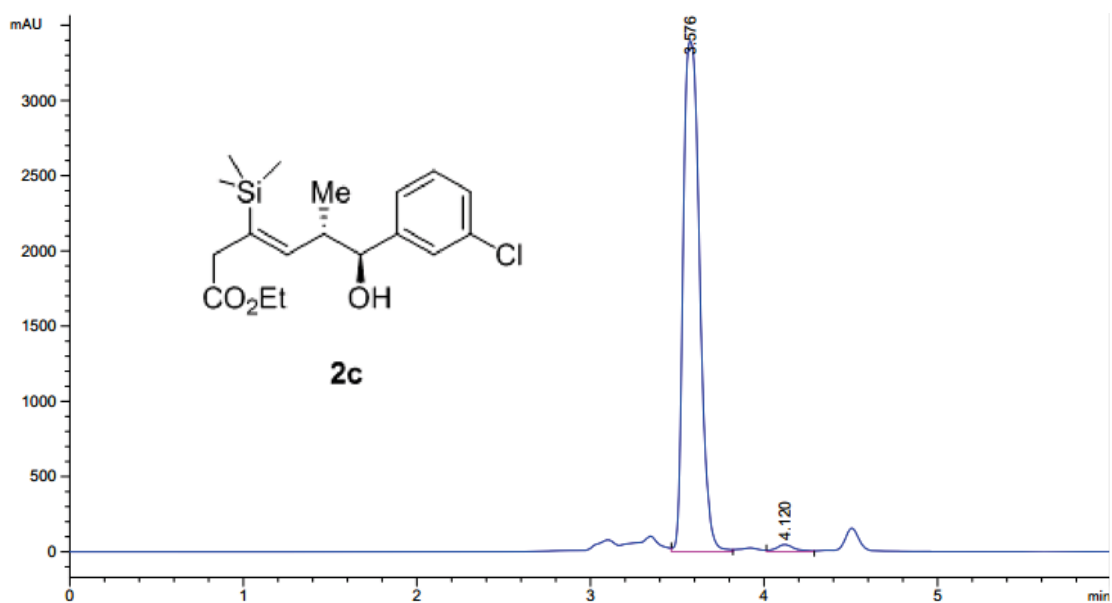

| Peak # | RetTime [min] | Type | Width [min] | Area mAU  | Area %  |
|--------|---------------|------|-------------|-----------|---------|
| 1      | 3.576         | VV   | 0.1058      | 2.23189e4 | 98.4016 |
| 2      | 4.120         | VV   | 0.1104      | 362.54346 | 1.5984  |

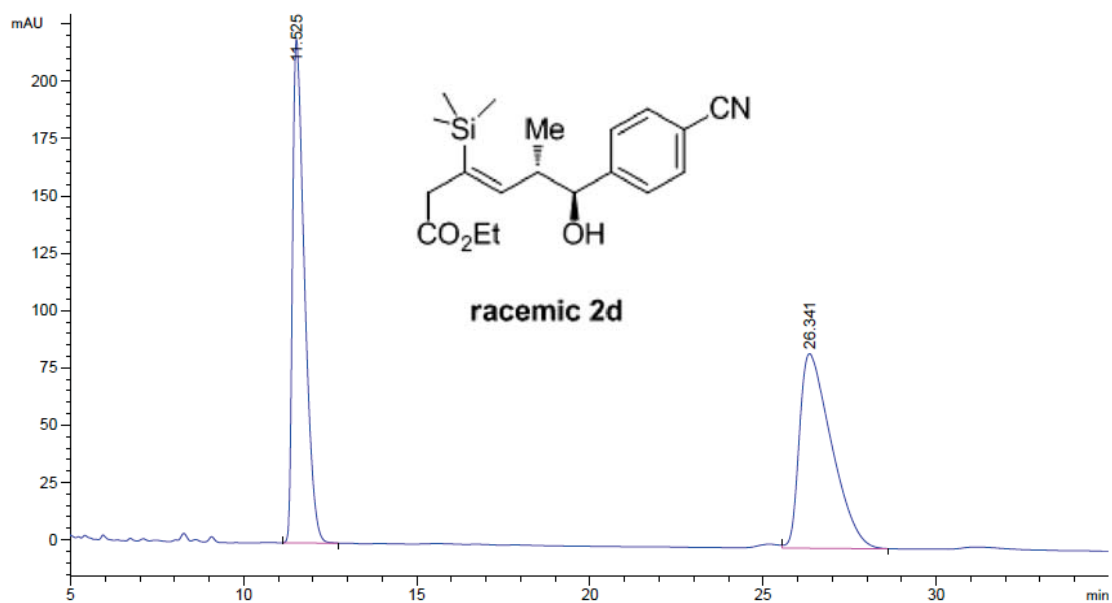

| Peak # | RetTime [min] | Type | Width [min] | Area mAU   | Area *s | Area %  |
|--------|---------------|------|-------------|------------|---------|---------|
| 1      | 11.525        | BB   | 0.3652      | 5286.09180 |         | 49.1807 |
| 2      | 26.341        | VB   | 0.9721      | 5462.22314 |         | 50.8193 |

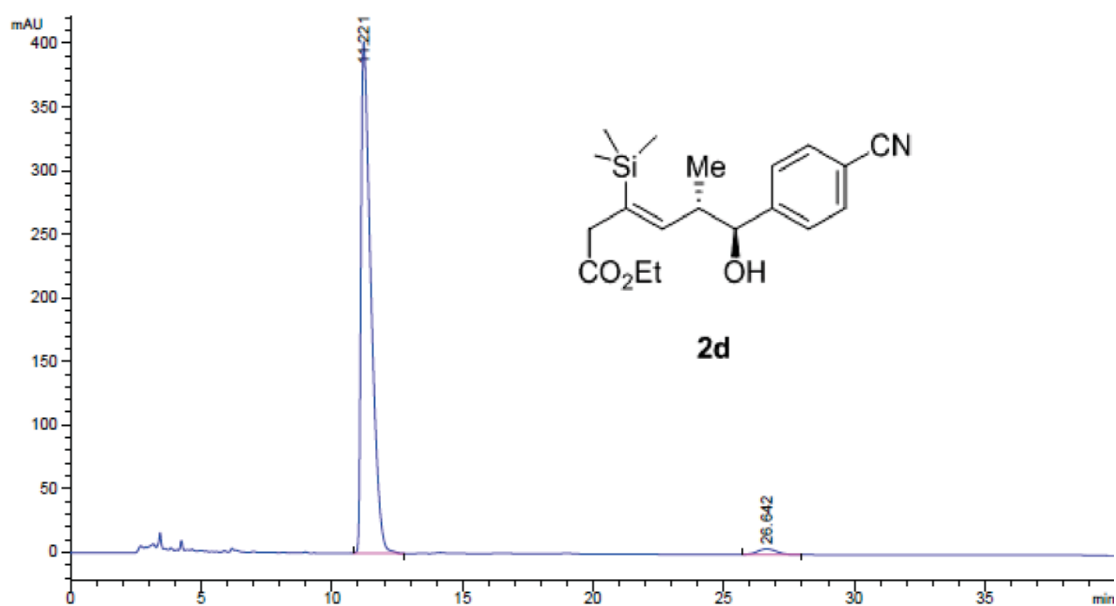

| Peak # | RetTime [min] | Type | Width [min] | Area mAU  | Area *s | Area %  |
|--------|---------------|------|-------------|-----------|---------|---------|
| 1      | 11.221        | BB   | 0.3923      | 1.06097e4 |         | 97.9215 |
| 2      | 26.642        | BB   | 0.7748      | 225.20332 |         | 2.0785  |

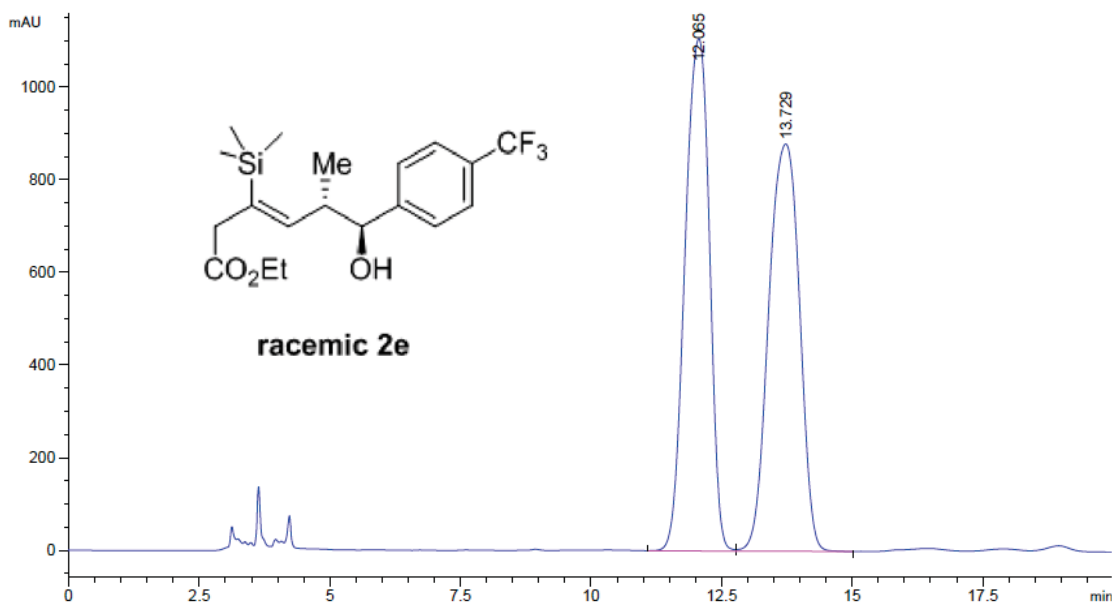

| Peak # | RetTime [min] | Type | Width [min] | Area mAU *s | Area %  |
|--------|---------------|------|-------------|-------------|---------|
| 1      | 12.065        | VV   | 0.5330      | 3.60496e4   | 49.9517 |
| 2      | 13.729        | VB   | 0.6728      | 3.61193e4   | 50.0483 |

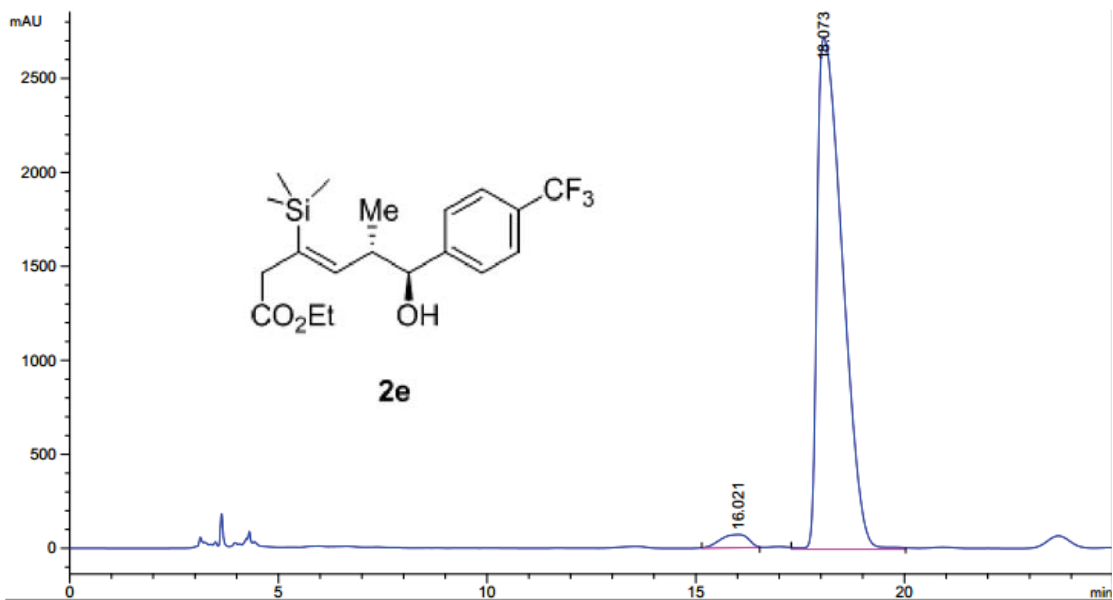

| Peak # | RetTime [min] | Type | Width [min] | Area mAU *s | Area %  |
|--------|---------------|------|-------------|-------------|---------|
| 1      | 16.021        | MM   | 0.7940      | 3325.87158  | 2.8250  |
| 2      | 18.073        | MM   | 0.7004      | 1.14403e5   | 97.1750 |



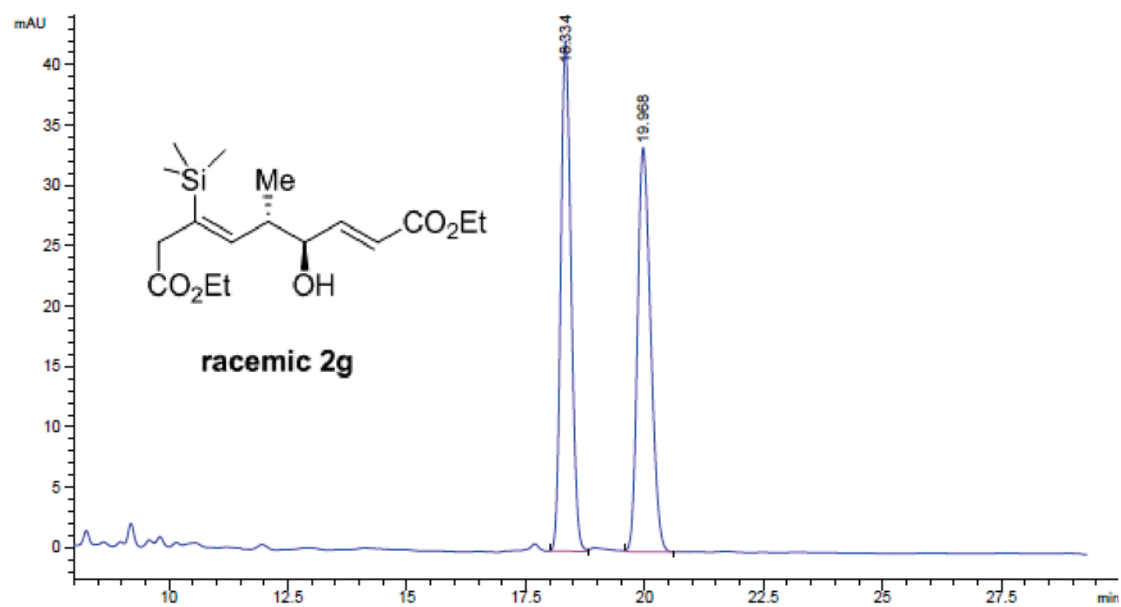

| Peak # | RetTime [min] | Type | Width [min] | Area mAU  | Area *s | Area %  |
|--------|---------------|------|-------------|-----------|---------|---------|
| 1      | 18.334        | BB   | 0.2332      | 634.45331 |         | 49.6892 |
| 2      | 19.968        | BB   | 0.2967      | 642.39093 |         | 50.3108 |

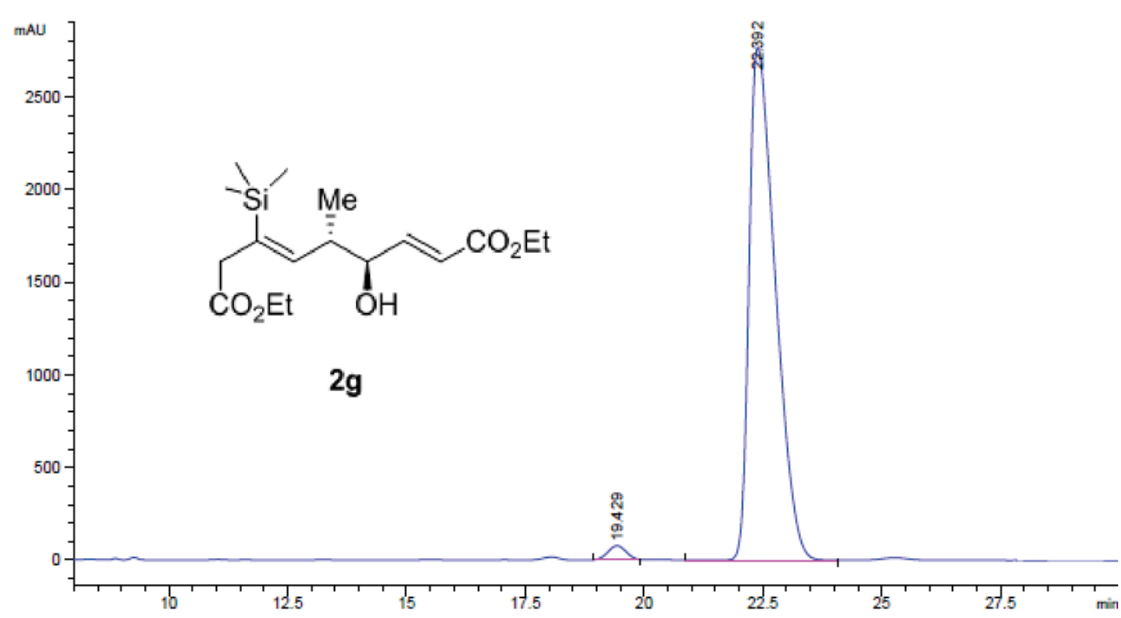

| Peak # | RetTime [min] | Type | Width [min] | Area mAU   | Area *s | Area %  |
|--------|---------------|------|-------------|------------|---------|---------|
| 1      | 19.429        | MM   | 0.4400      | 1988.66541 |         | 1.8421  |
| 2      | 22.392        | VV   | 0.5891      | 1.05965e5  |         | 98.1579 |

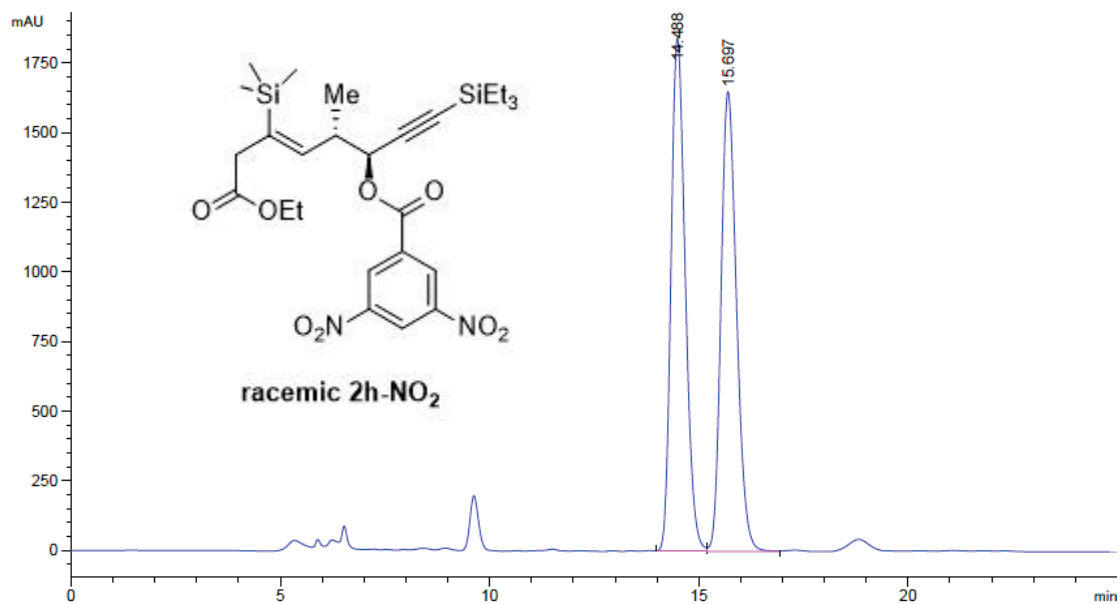

| Peak # | RetTime [min] | Type | Width [min] | Area mAU  | Area *s | Area %  |
|--------|---------------|------|-------------|-----------|---------|---------|
| 1      | 14.494        | VV   | 0.3816      | 4.35291e4 |         | 50.5225 |
| 2      | 15.703        | VV   | 0.4066      | 4.26287e4 |         | 49.4775 |

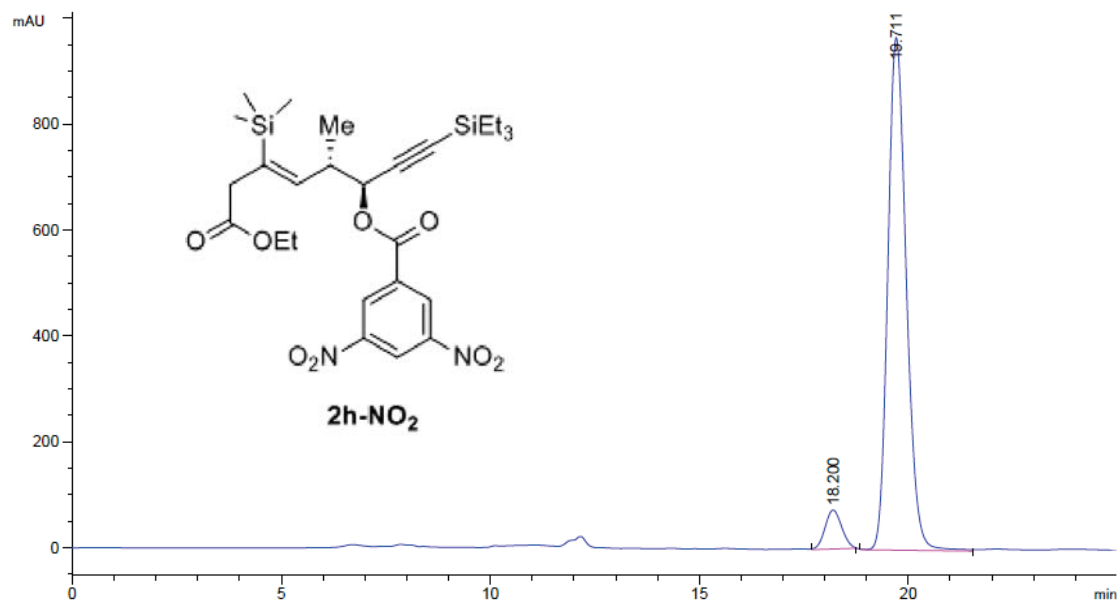

| Peak # | RetTime [min] | Type | Width [min] | Area mAU   | Area *s | Area %  |
|--------|---------------|------|-------------|------------|---------|---------|
| 1      | 18.200        | MM   | 0.4620      | 2038.15515 |         | 6.4359  |
| 2      | 19.711        | MM   | 0.5104      | 2.96302e4  |         | 93.5641 |

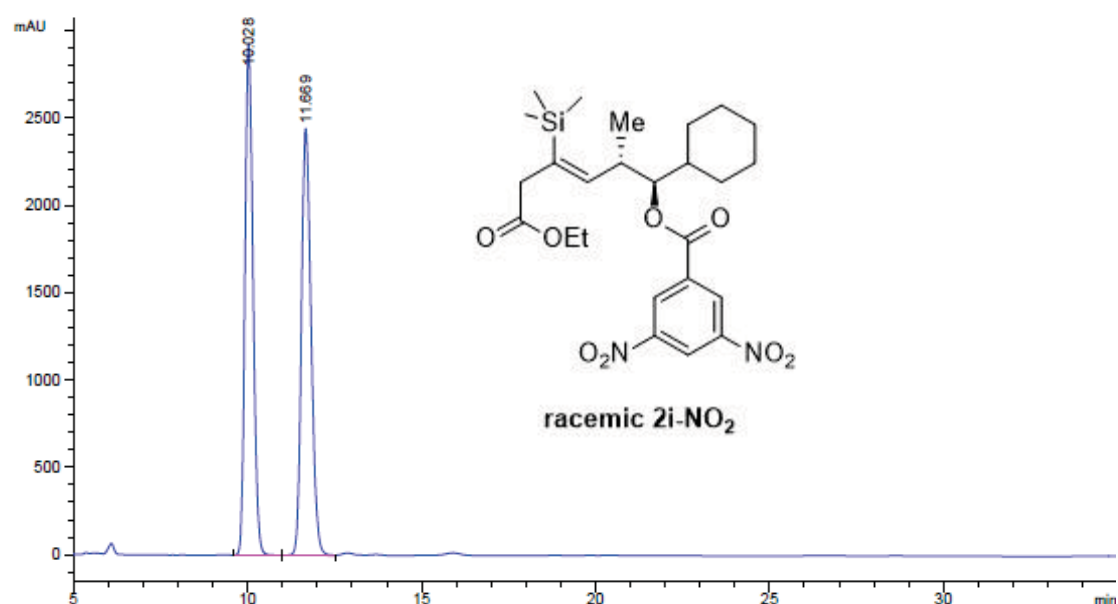

| Peak # | RetTime [min] | Type | Width [min] | Area mAU  | Area %  |
|--------|---------------|------|-------------|-----------|---------|
| 1      | 10.028        | VV   | 0.2503      | 4.71212e4 | 49.9241 |
| 2      | 11.669        | VV   | 0.3014      | 4.72645e4 | 50.0759 |

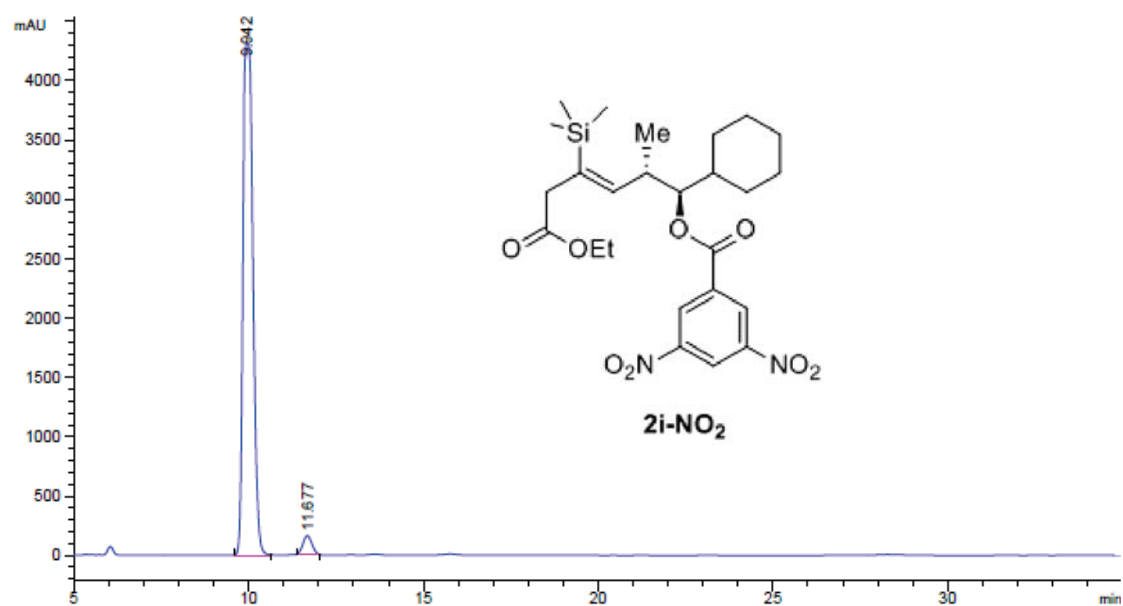

| Peak # | RetTime [min] | Type | Width [min] | Area mAU   | Area %  |
|--------|---------------|------|-------------|------------|---------|
| 1      | 9.942         | MM   | 0.3302      | 8.57055e4  | 96.6194 |
| 2      | 11.677        | MM   | 0.3084      | 2998.77637 | 3.3806  |

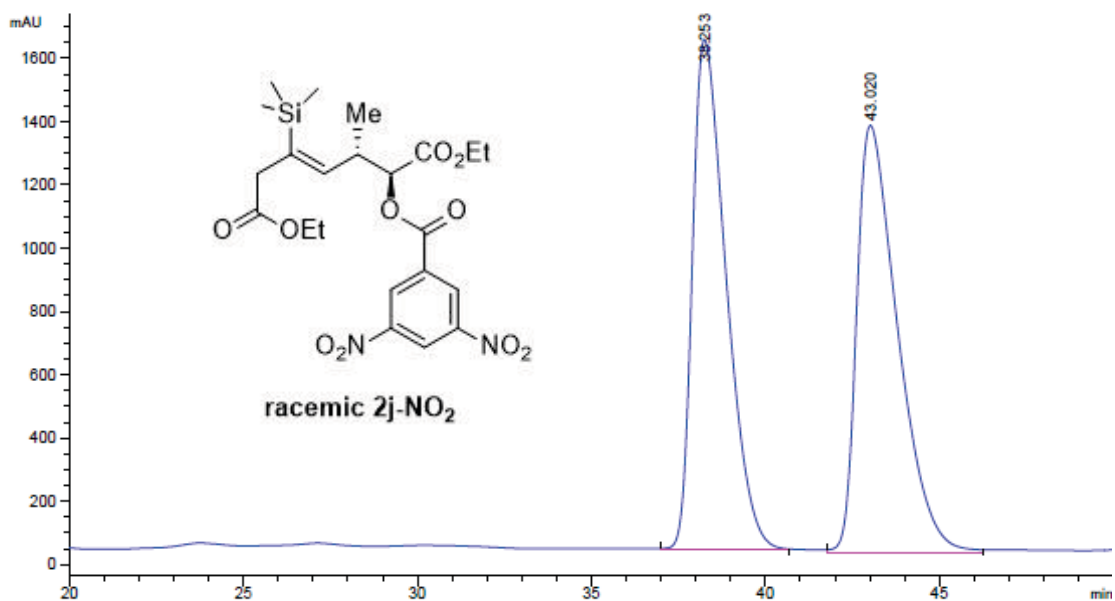

| Peak # | RetTime [min] | Type | Width [min] | Area mAU  | Area *s | Area %  |
|--------|---------------|------|-------------|-----------|---------|---------|
| 1      | 38.253        | MM   | 1.1209      | 1.08389e5 |         | 49.5487 |
| 2      | 43.020        | MM   | 1.3617      | 1.10364e5 |         | 50.4513 |

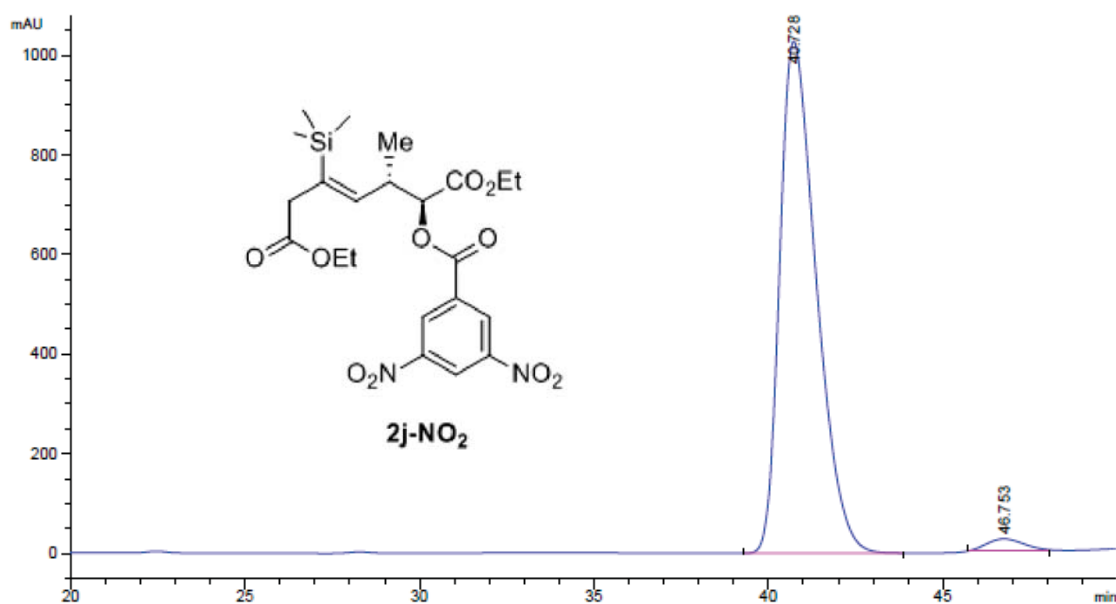

| Peak # | RetTime [min] | Type | Width [min] | Area mAU   | Area *s | Area %  |
|--------|---------------|------|-------------|------------|---------|---------|
| 1      | 40.728        | BB   | 1.1155      | 7.46788e4  |         | 97.8075 |
| 2      | 46.753        | MM   | 1.2068      | 1674.00049 |         | 2.1925  |

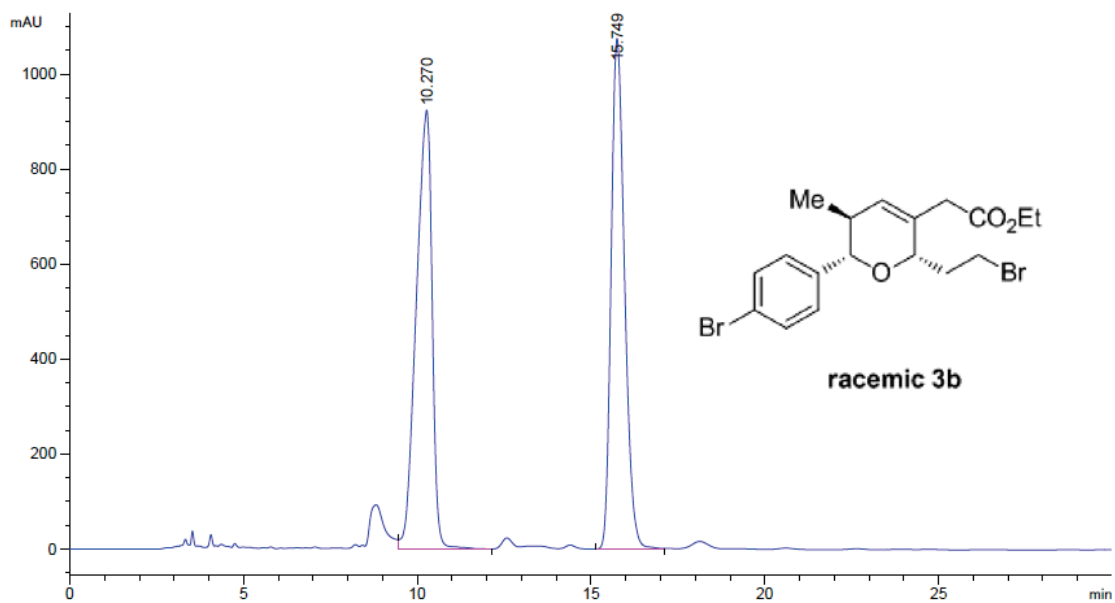

| Peak # | RetTime [min] | Type | Width [min] | Area mAU  | Area *s | Area %  |
|--------|---------------|------|-------------|-----------|---------|---------|
| 1      | 10.270        | VB   | 0.5180      | 2.93856e4 |         | 50.4694 |
| 2      | 15.749        | BB   | 0.4164      | 2.88390e4 |         | 49.5306 |

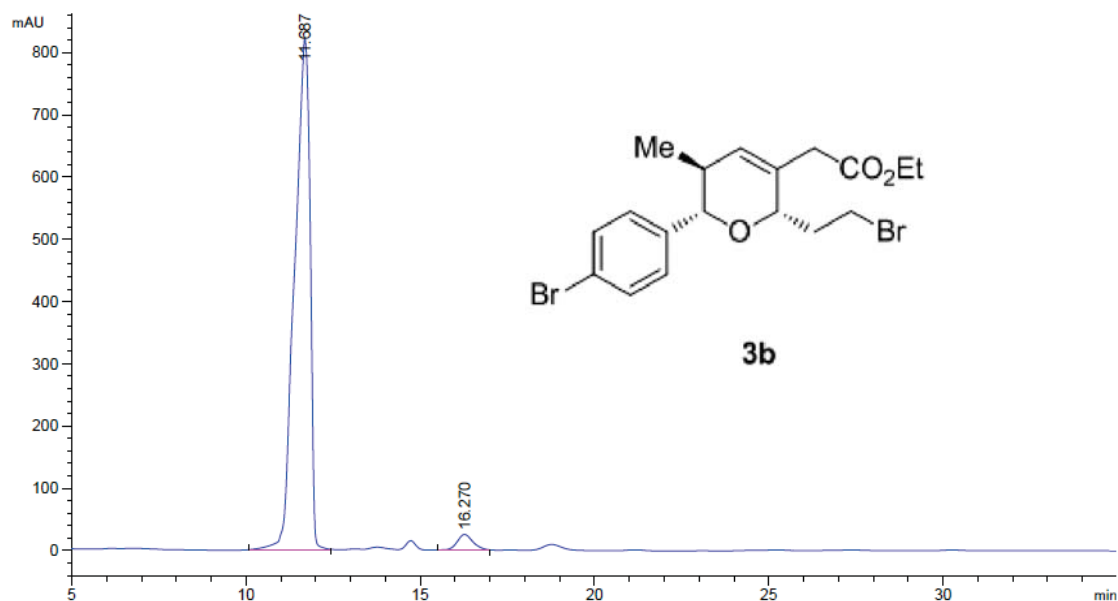

| Peak # | RetTime [min] | Type | Width [min] | Area mAU  | Area *s | Area %  |
|--------|---------------|------|-------------|-----------|---------|---------|
| 1      | 11.687        | MM   | 0.5137      | 2.53156e4 |         | 97.2439 |
| 2      | 16.270        | MM   | 0.4948      | 717.50879 |         | 2.7561  |

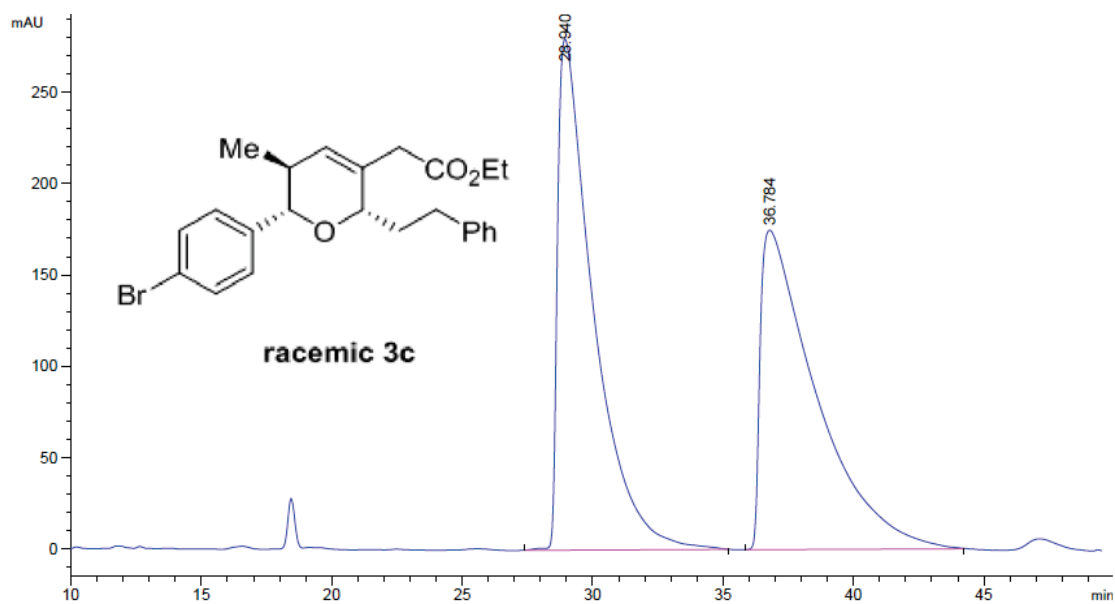

| Peak # | RetTime [min] | Type | Width [min] | Area mAU  | Area %  |
|--------|---------------|------|-------------|-----------|---------|
| 1      | 28.940        | BB   | 1.3684      | 2.65703e4 | 50.5705 |
| 2      | 36.784        | BB   | 2.0256      | 2.59709e4 | 49.4295 |

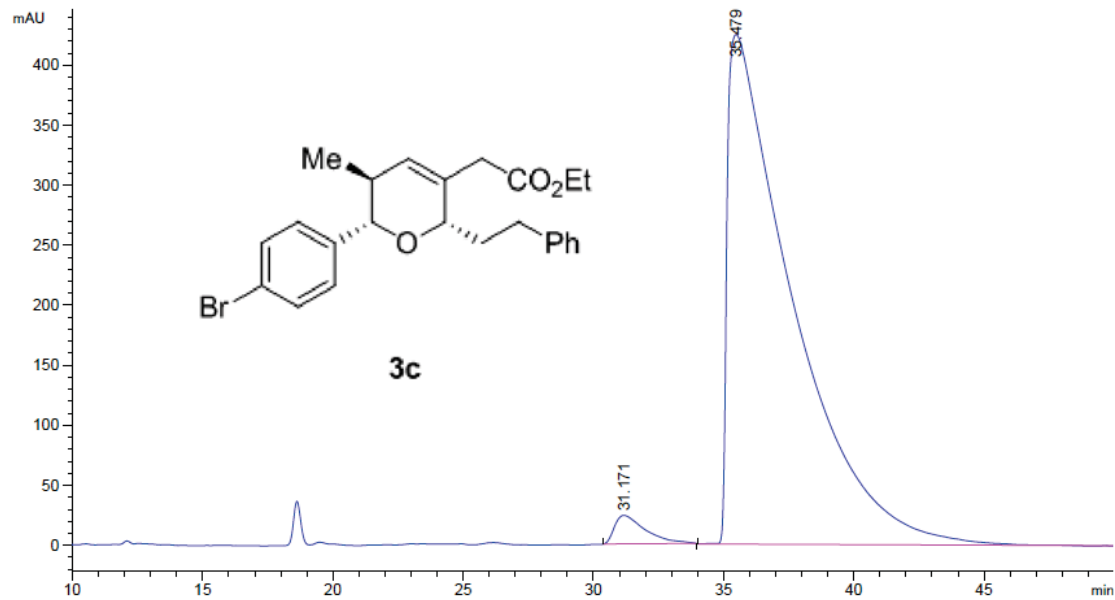

| Peak # | RetTime [min] | Type | Width [min] | Area mAU   | Area %  |
|--------|---------------|------|-------------|------------|---------|
| 1      | 31.171        | MM   | 1.3689      | 1950.72742 | 2.5838  |
| 2      | 35.479        | MM   | 2.8878      | 7.35491e4  | 97.4162 |

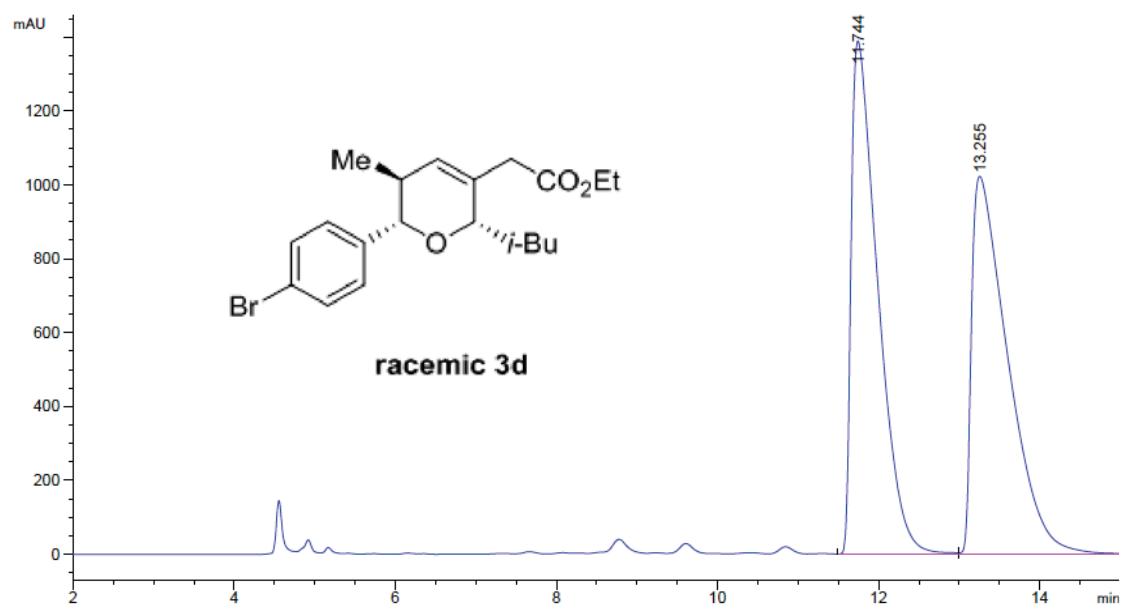

| Peak # | RetTime [min] | Type | Width [min] | Area mAU  | Area *s | Area %  |
|--------|---------------|------|-------------|-----------|---------|---------|
| 1      | 11.744        | VV   | 0.3462      | 3.18740e4 |         | 49.8839 |
| 2      | 13.255        | VV   | 0.4683      | 3.20224e4 |         | 50.1161 |

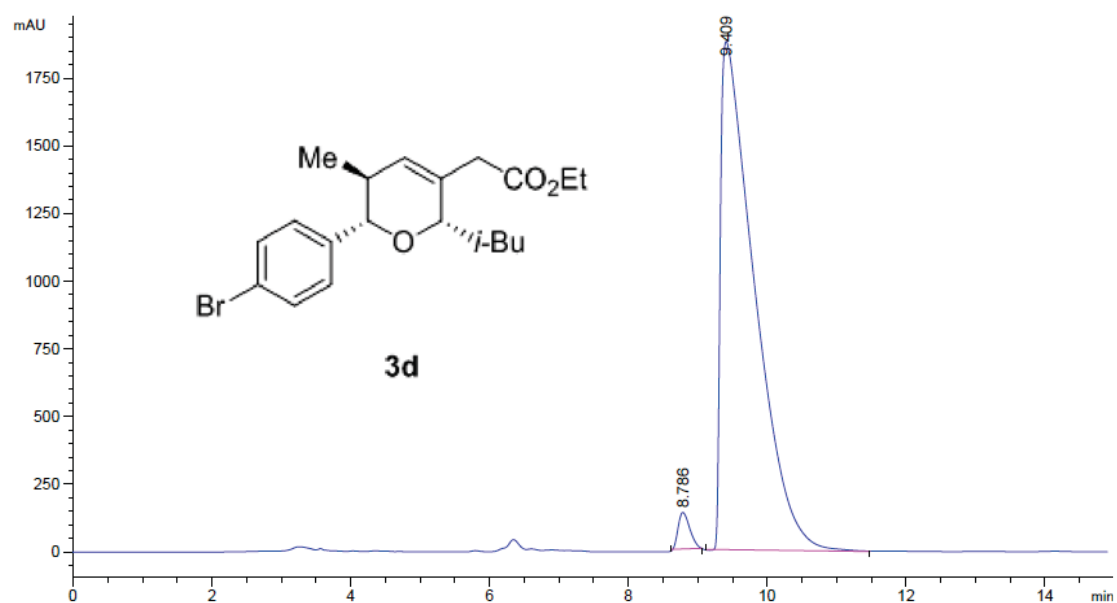

| Peak # | RetTime [min] | Type | Width [min] | Area mAU   | Area *s | Area %  |
|--------|---------------|------|-------------|------------|---------|---------|
| 1      | 8.786         | MM   | 0.1934      | 1568.10657 |         | 2.4020  |
| 2      | 9.409         | MM   | 0.5655      | 6.37158e4  |         | 97.5980 |

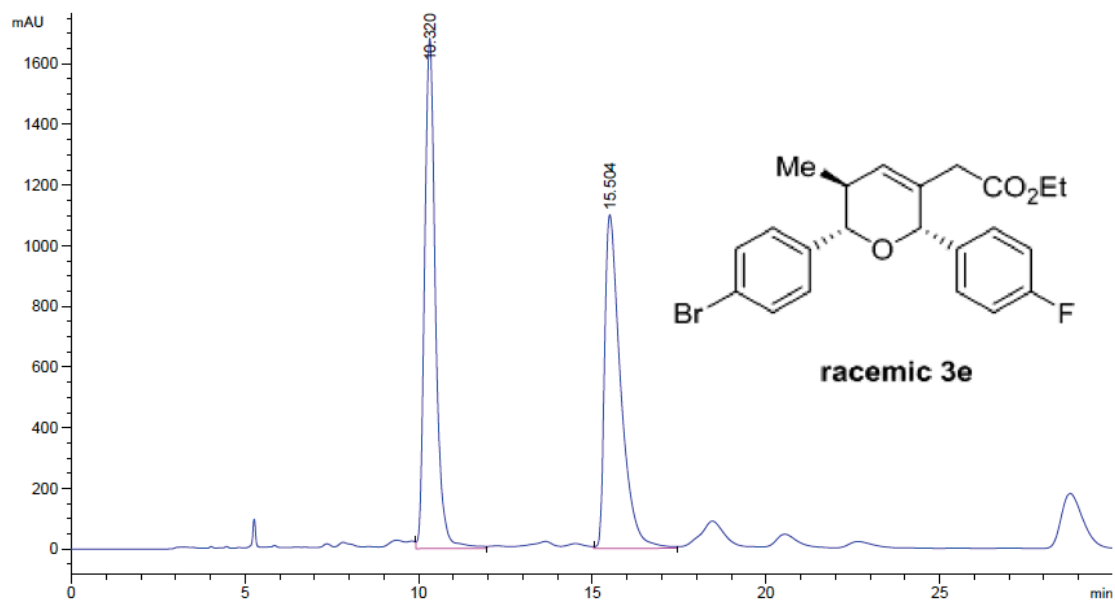

| Peak # | RetTime [min] | Type | Width [min] | Area mAU  | Area %  |
|--------|---------------|------|-------------|-----------|---------|
| 1      | 10.320        | VV   | 0.3396      | 3.67871e4 | 50.9656 |
| 2      | 15.504        | VV   | 0.4788      | 3.53933e4 | 49.0344 |

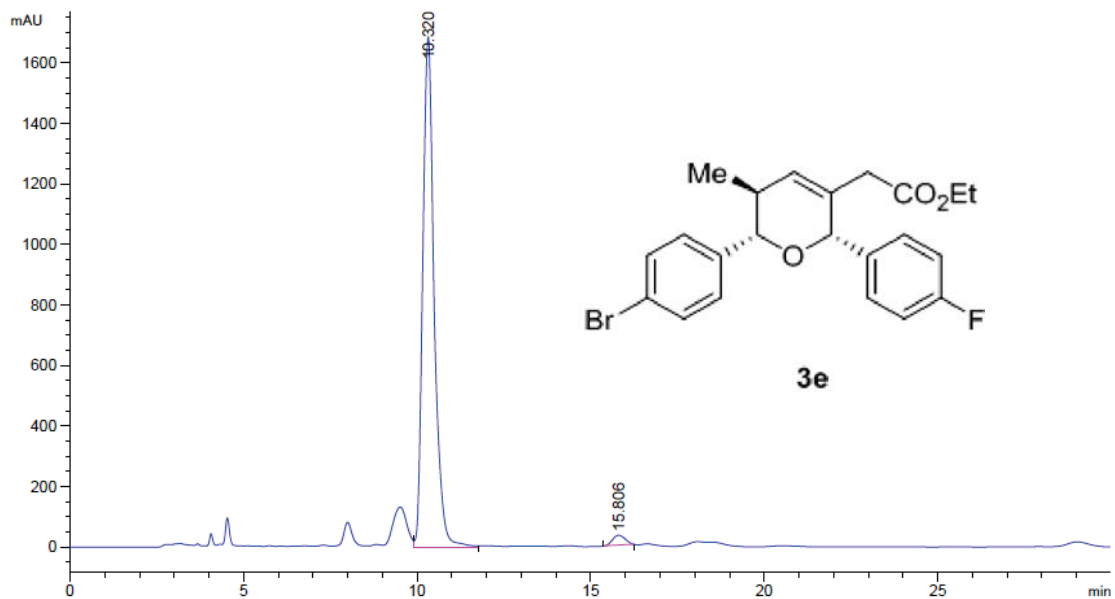

| Peak # | RetTime [min] | Type | Width [min] | Area mAU  | Area %  |
|--------|---------------|------|-------------|-----------|---------|
| 1      | 10.320        | VB   | 0.3495      | 3.83149e4 | 97.9648 |
| 2      | 15.806        | MM   | 0.4119      | 795.99261 | 2.0352  |



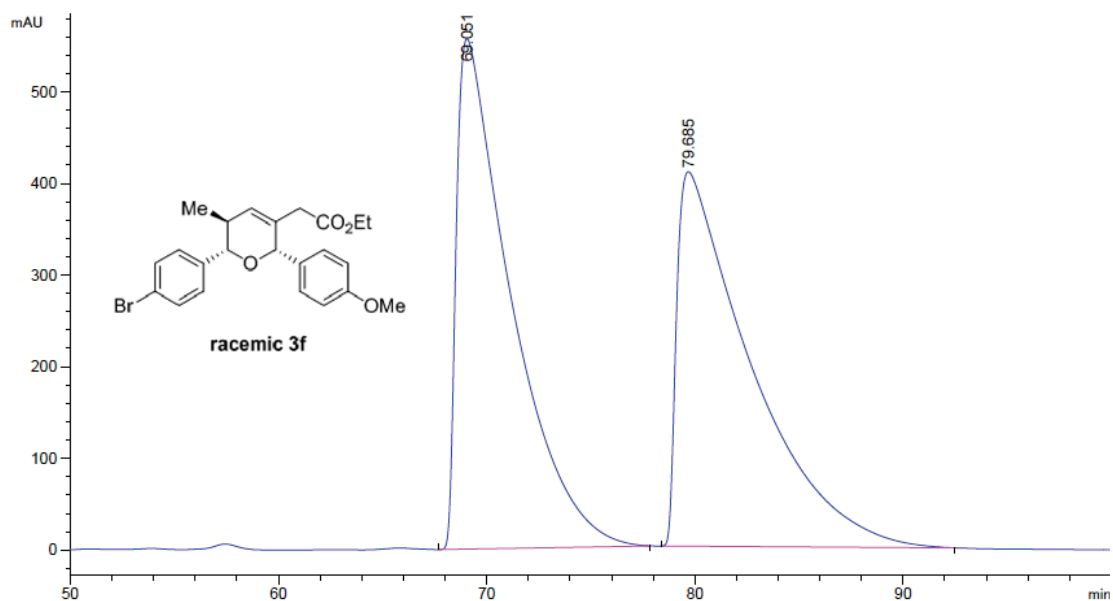

| Peak # | RetTime [min] | Type | Width [min] | Area mAU  | Area *s | Area %  |
|--------|---------------|------|-------------|-----------|---------|---------|
| 1      | 69.051        | VB   | 2.4654      | 1.00832e5 |         | 50.1163 |
| 2      | 79.685        | BB   | 3.2389      | 1.00364e5 |         | 49.8837 |

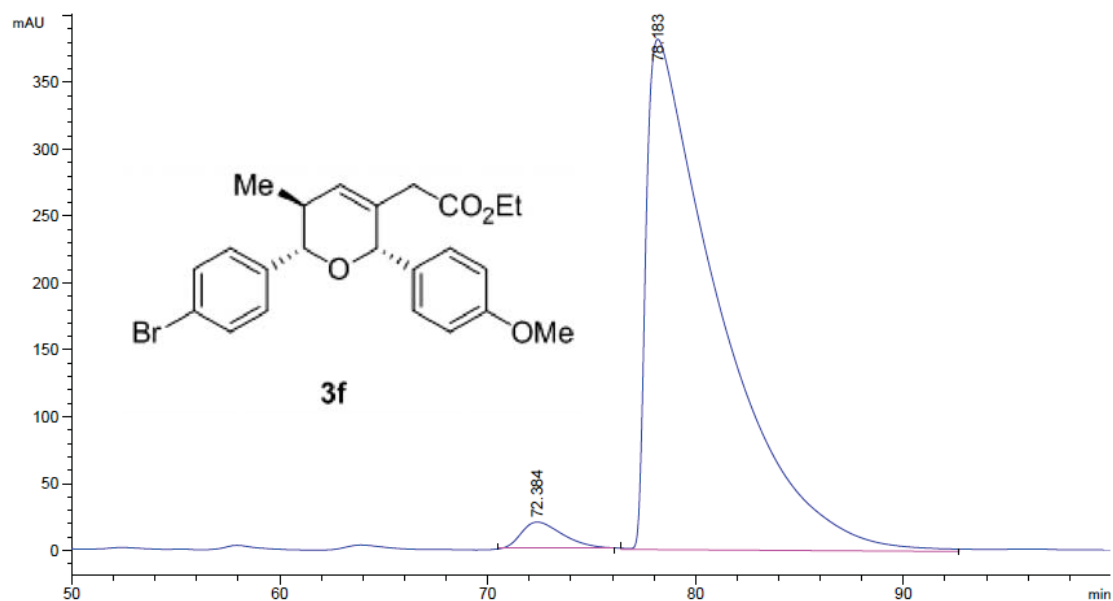

| Peak # | RetTime [min] | Type | Width [min] | Area mAU   | Area *s | Area %  |
|--------|---------------|------|-------------|------------|---------|---------|
| 1      | 72.384        | MM   | 2.1917      | 2482.89893 |         | 2.6015  |
| 2      | 78.183        | MM   | 4.0595      | 9.29575e4  |         | 97.3985 |

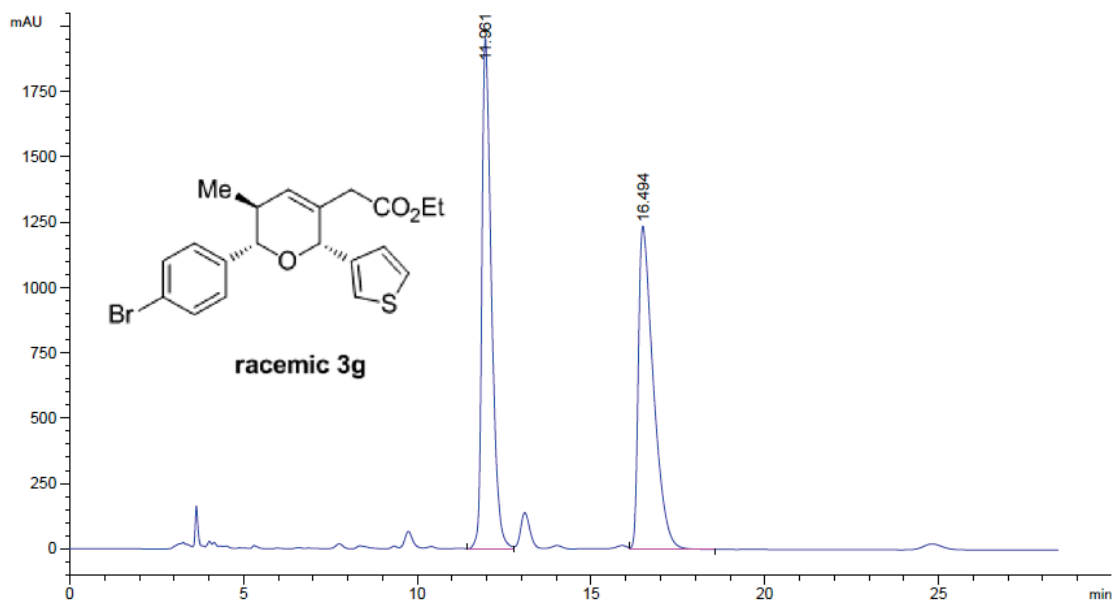

| Peak # | RetTime [min] | Type | Width [min] | Area mAU  | Area *s | Area %  |
|--------|---------------|------|-------------|-----------|---------|---------|
| 1      | 11.961        | VV   | 0.2906      | 3.75103e4 |         | 50.2515 |
| 2      | 16.494        | VB   | 0.4462      | 3.71348e4 |         | 49.7485 |

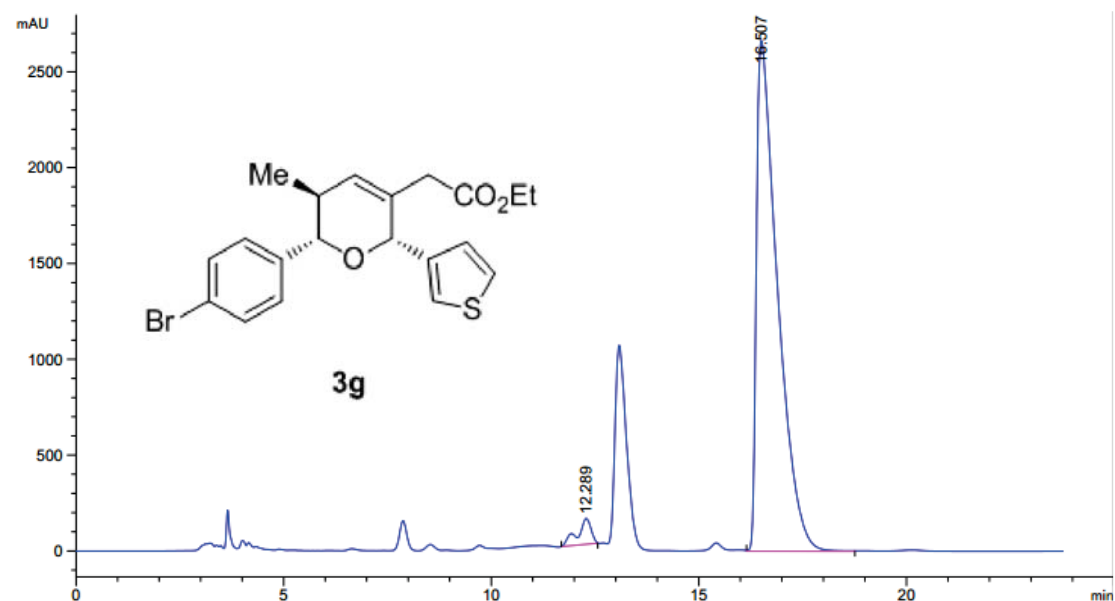

| Peak # | RetTime [min] | Type | Width [min] | Area mAU   | Area *s | Area %  |
|--------|---------------|------|-------------|------------|---------|---------|
| 1      | 12.289        | MM   | 0.3794      | 3064.22607 |         | 3.1511  |
| 2      | 16.507        | VV   | 0.5172      | 9.41774e4  |         | 96.8489 |

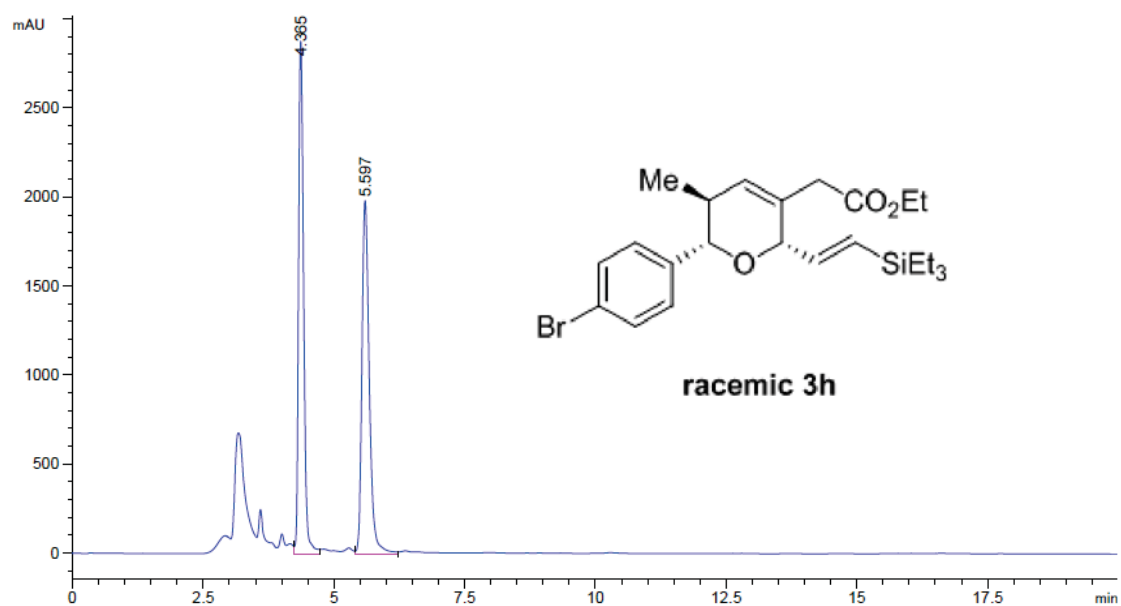

| Peak # | RetTime [min] | Type | Width [min] | Area mAU  | Area *s | Area %  |
|--------|---------------|------|-------------|-----------|---------|---------|
| 1      | 4.365         | VV   | 0.1063      | 1.94334e4 |         | 50.0931 |
| 2      | 5.597         | VV   | 0.1488      | 1.93612e4 |         | 49.9069 |

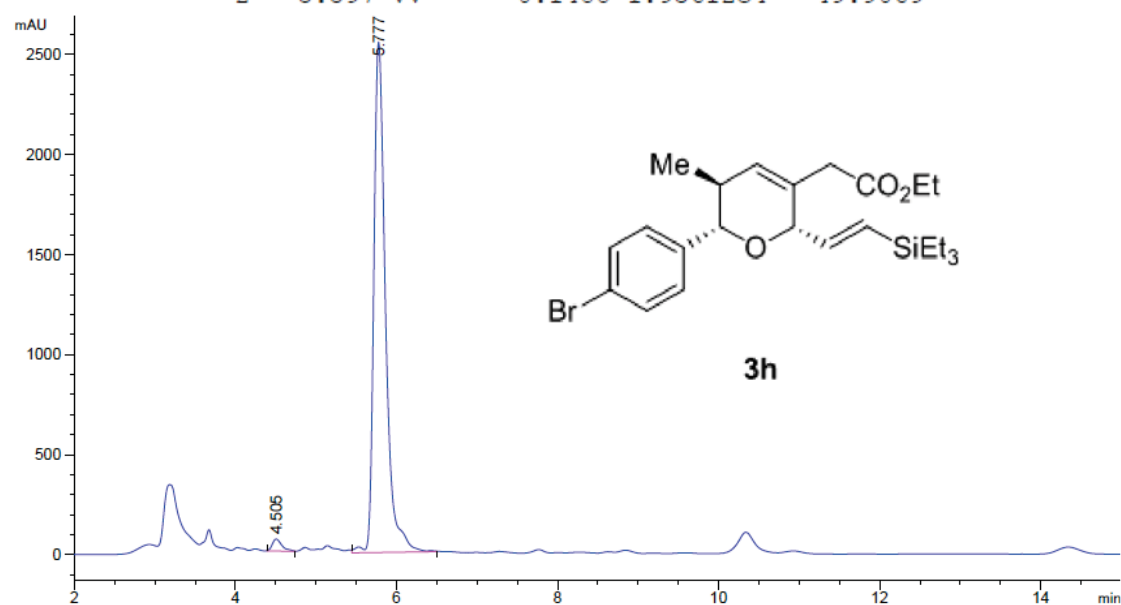

| Peak # | RetTime [min] | Type | Width [min] | Area mAU  | Area *s | Area %  |
|--------|---------------|------|-------------|-----------|---------|---------|
| 1      | 4.505         | MM   | 0.1386      | 500.07956 |         | 1.9061  |
| 2      | 5.777         | MM   | 0.1680      | 2.57350e4 |         | 98.0939 |

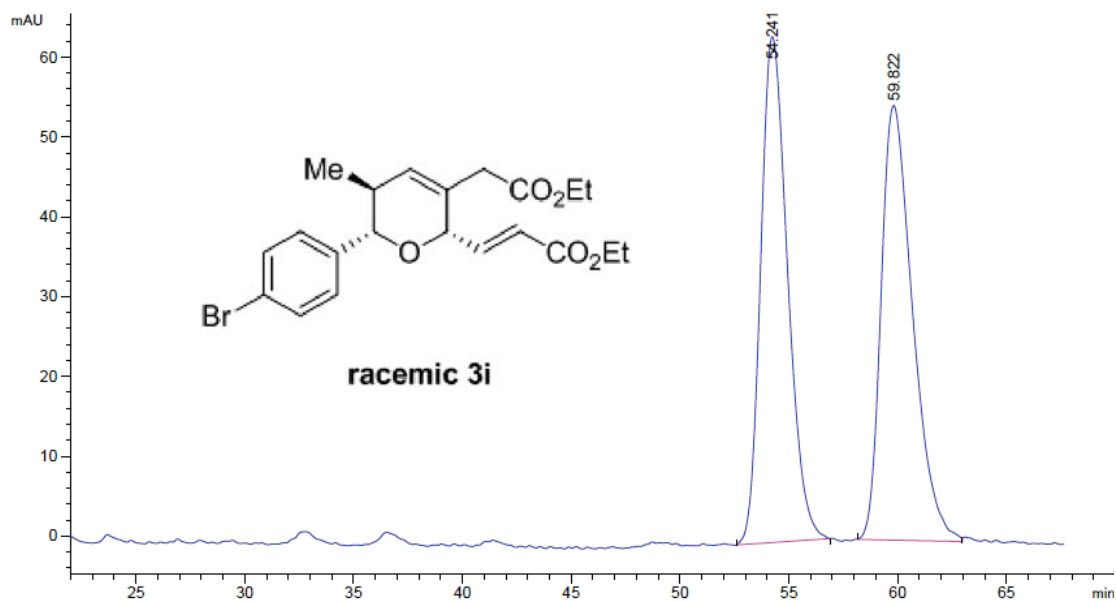

| Peak # | RetTime [min] | Type | Width [min] | Area mAU   | Area %  |
|--------|---------------|------|-------------|------------|---------|
| 1      | 54.241        | BB   | 1.3262      | 5422.08643 | 49.7356 |
| 2      | 59.822        | BV   | 1.5050      | 5479.72949 | 50.2644 |

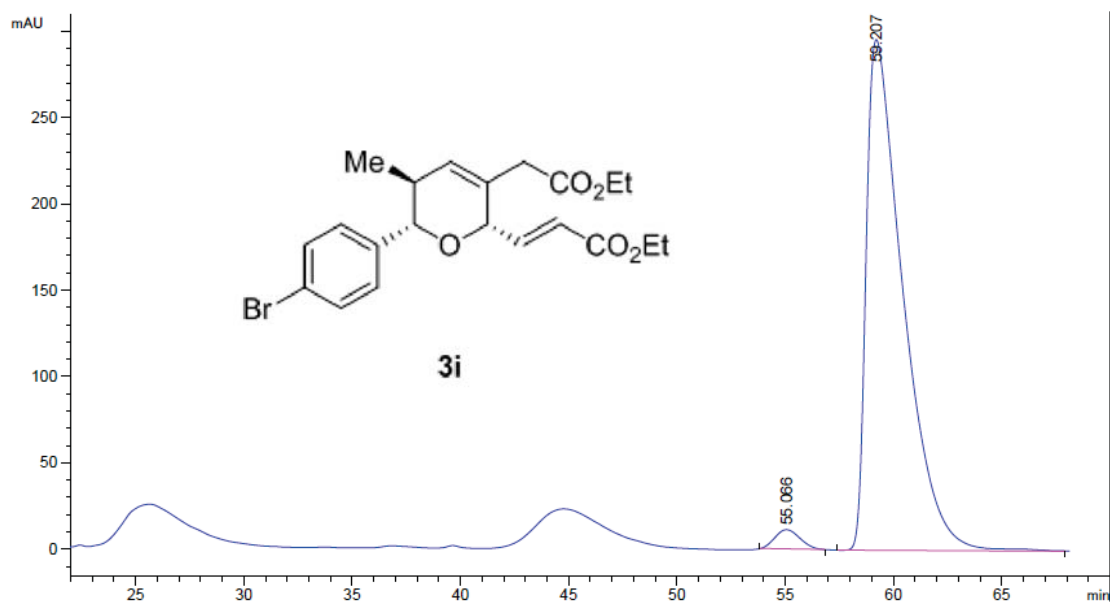

| Peak # | RetTime [min] | Type | Width [min] | Area mAU  | Area %  |
|--------|---------------|------|-------------|-----------|---------|
| 1      | 55.066        | MM   | 1.3351      | 890.27448 | 2.4886  |
| 2      | 59.207        | MM   | 1.9652      | 3.48832e4 | 97.5114 |

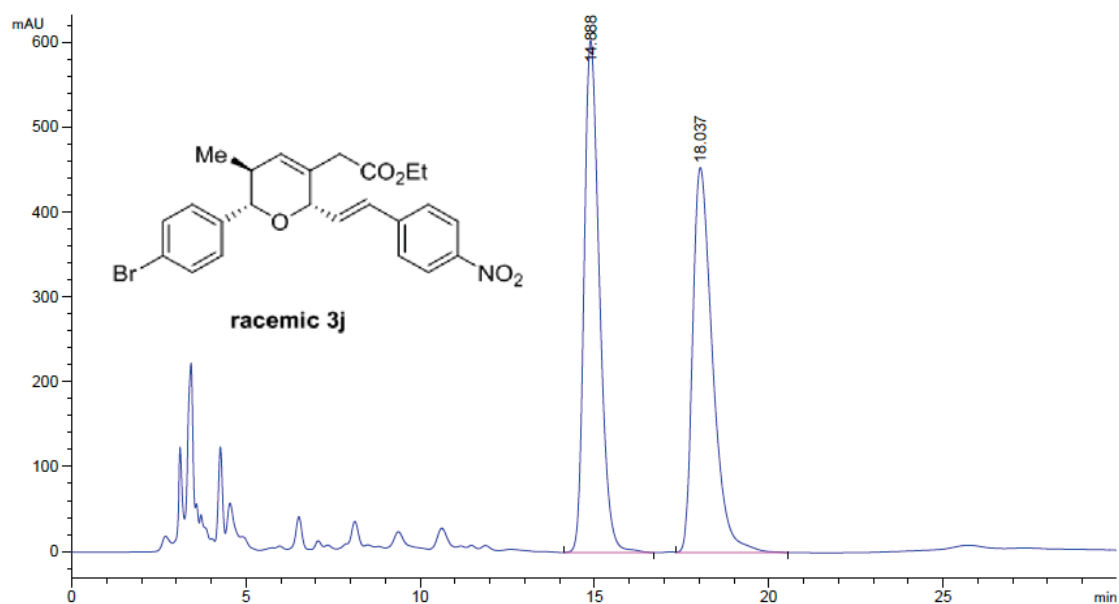

| Peak # | RetTime [min] | Type | Width [min] | Area mAU  | Area %  |
|--------|---------------|------|-------------|-----------|---------|
| 1      | 14.888        | BB   | 0.4696      | 1.84225e4 | 50.5891 |
| 2      | 18.037        | VB   | 0.6053      | 1.79934e4 | 49.4109 |

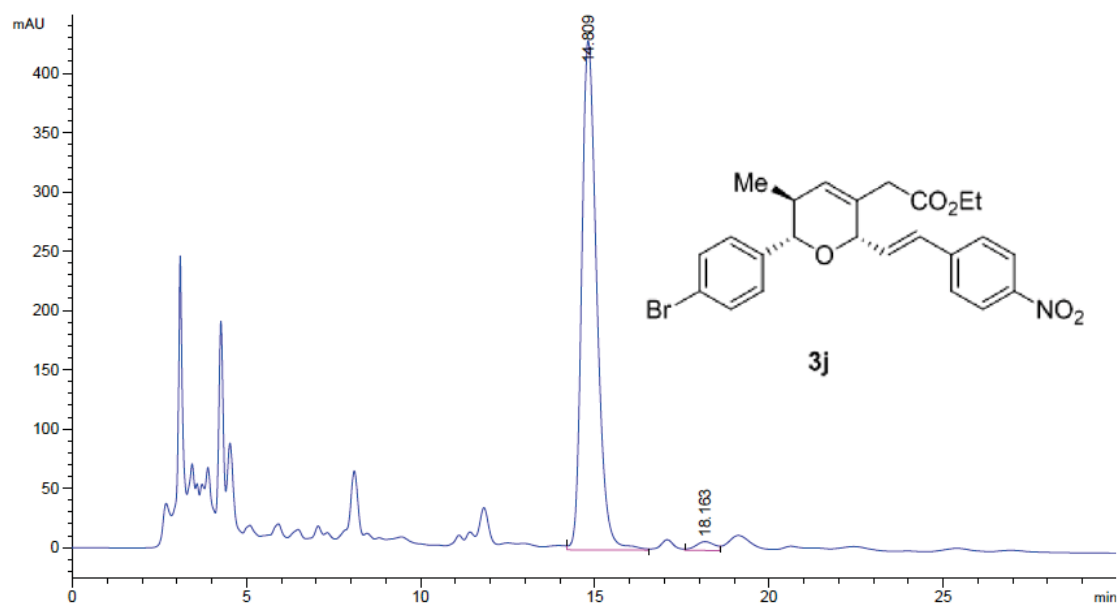

| Peak # | RetTime [min] | Type | Width [min] | Area mAU  | Area %  |
|--------|---------------|------|-------------|-----------|---------|
| 1      | 14.809        | VB   | 0.4621      | 1.28927e4 | 97.8683 |
| 2      | 18.163        | VV   | 0.5766      | 280.82120 | 2.1317  |

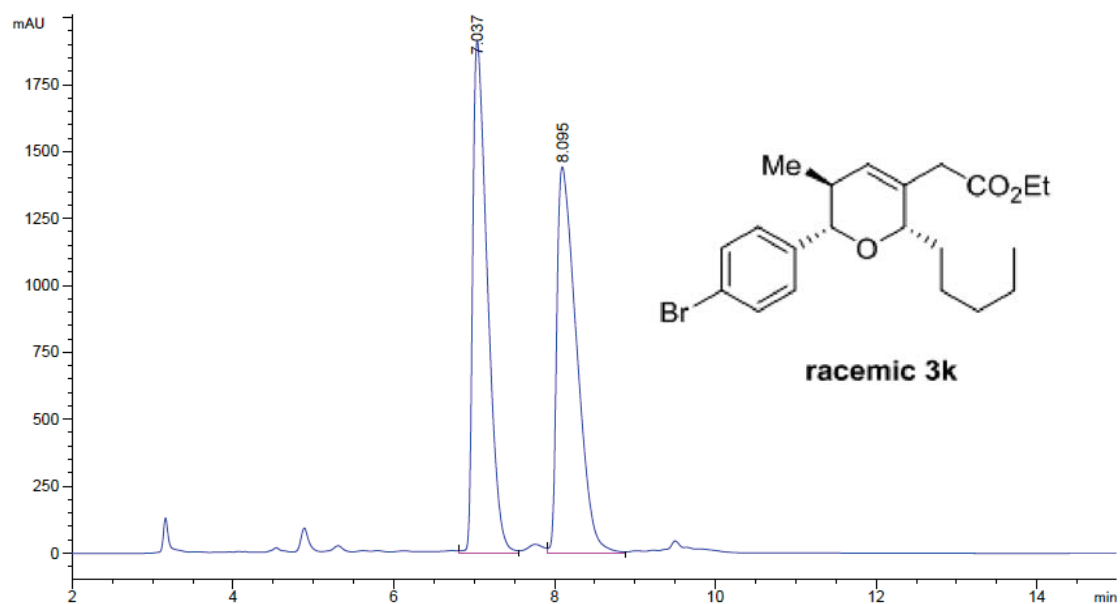

| Peak # | RetTime [min] | Type | Width [min] | Area mAU  | Area *s | Area %  |
|--------|---------------|------|-------------|-----------|---------|---------|
| 1      | 7.037         | VV   | 0.1931      | 2.42882e4 |         | 49.6434 |
| 2      | 8.095         | VV   | 0.2662      | 2.46372e4 |         | 50.3566 |

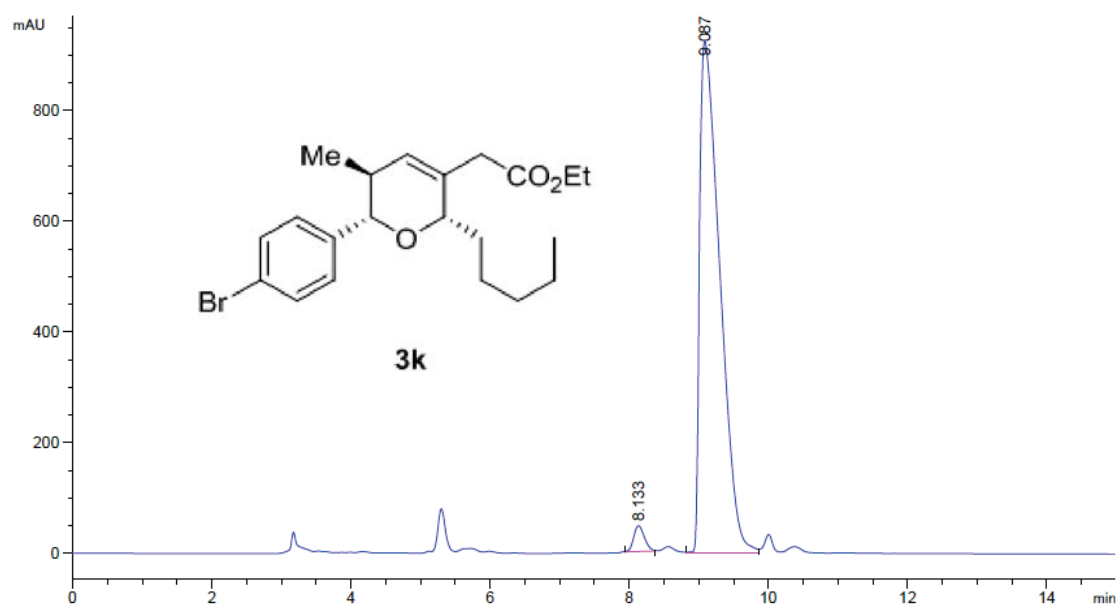

| Peak # | RetTime [min] | Type | Width [min] | Area mAU  | Area *s | Area %  |
|--------|---------------|------|-------------|-----------|---------|---------|
| 1      | 8.133         | MM   | 0.1783      | 496.41330 |         | 2.5884  |
| 2      | 9.087         | VV   | 0.3157      | 1.86820e4 |         | 97.4116 |

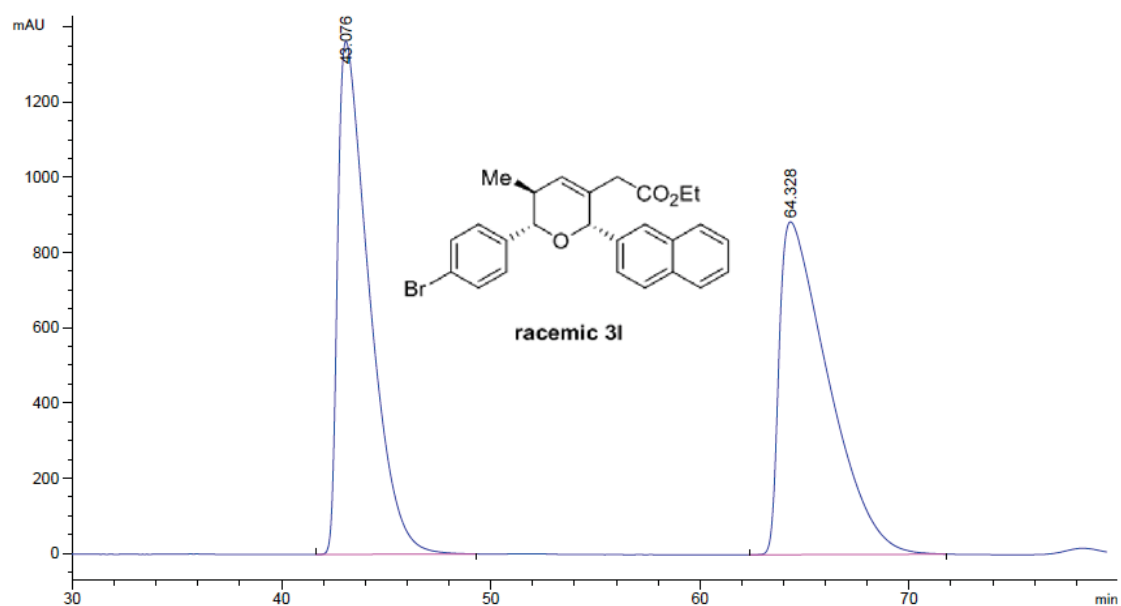

| Peak # | RetTime [min] | Type | Width [min] | Area mAU  | Area *s | Area %  |
|--------|---------------|------|-------------|-----------|---------|---------|
| 1      | 43.076        | VB   | 1.5450      | 1.42529e5 |         | 49.7376 |
| 2      | 64.328        | BB   | 2.3063      | 1.44033e5 |         | 50.2624 |

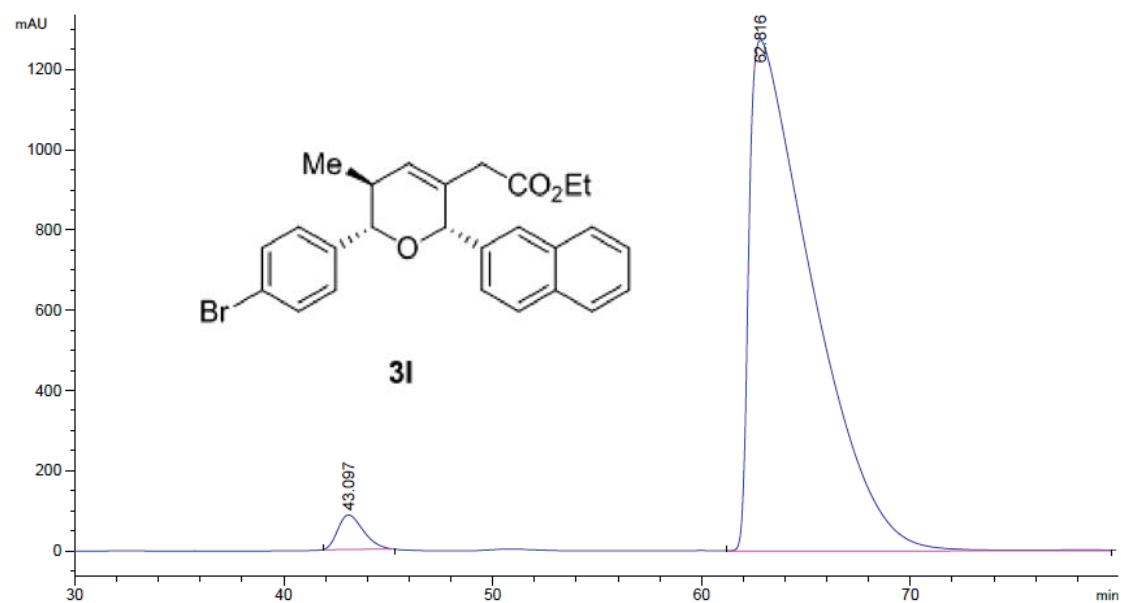

| Peak # | RetTime [min] | Type | Width [min] | Area mAU   | Area *s | Area %  |
|--------|---------------|------|-------------|------------|---------|---------|
| 1      | 43.097        | MM   | 1.4150      | 7327.45947 |         | 2.6702  |
| 2      | 62.816        | MM   | 3.4956      | 2.67087e5  |         | 97.3298 |

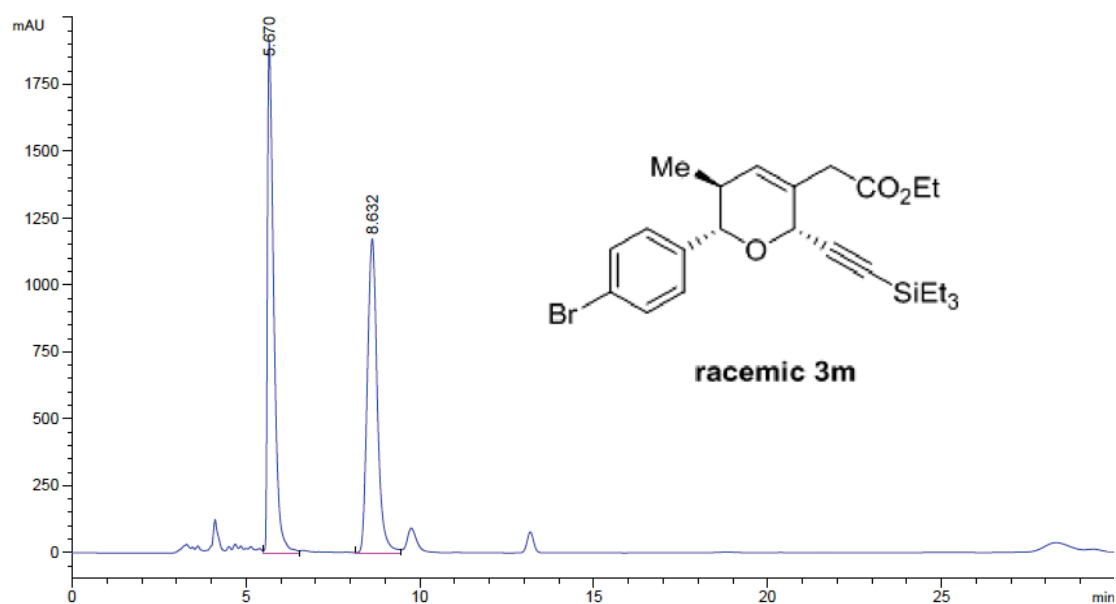

| Peak # | RetTime [min] | Type | Width [min] | Area mAU  | Area %  |
|--------|---------------|------|-------------|-----------|---------|
| 1      | 5.670         | VV   | 0.1920      | 2.42842e4 | 50.9861 |
| 2      | 8.632         | VV   | 0.3091      | 2.33448e4 | 49.0139 |

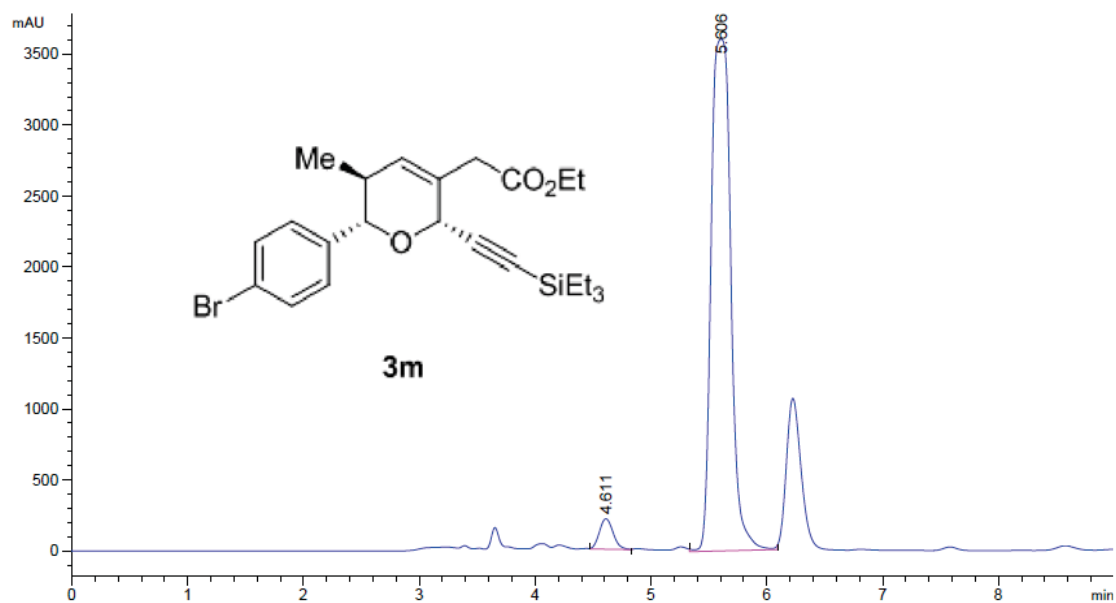

| Peak # | RetTime [min] | Type | Width [min] | Area mAU   | Area %  |
|--------|---------------|------|-------------|------------|---------|
| 1      | 5.945         | MM   | 0.1544      | 1705.52100 | 2.7031  |
| 2      | 8.995         | MM   | 0.4551      | 6.13894e4  | 97.2969 |



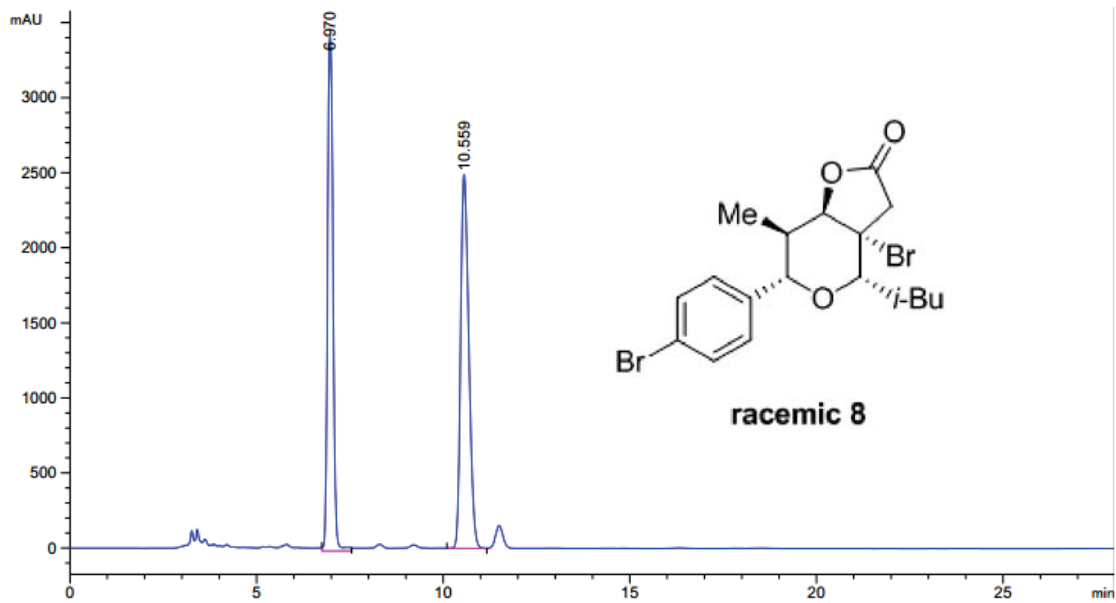

| Peak # | RetTime [min] | Type | Width [min] | Area mAU  | Area %  |
|--------|---------------|------|-------------|-----------|---------|
| 1      | 6.970         | MM   | 0.1699      | 3.49374e4 | 47.9657 |
| 2      | 10.559        | VV   | 0.2372      | 3.79008e4 | 52.0343 |

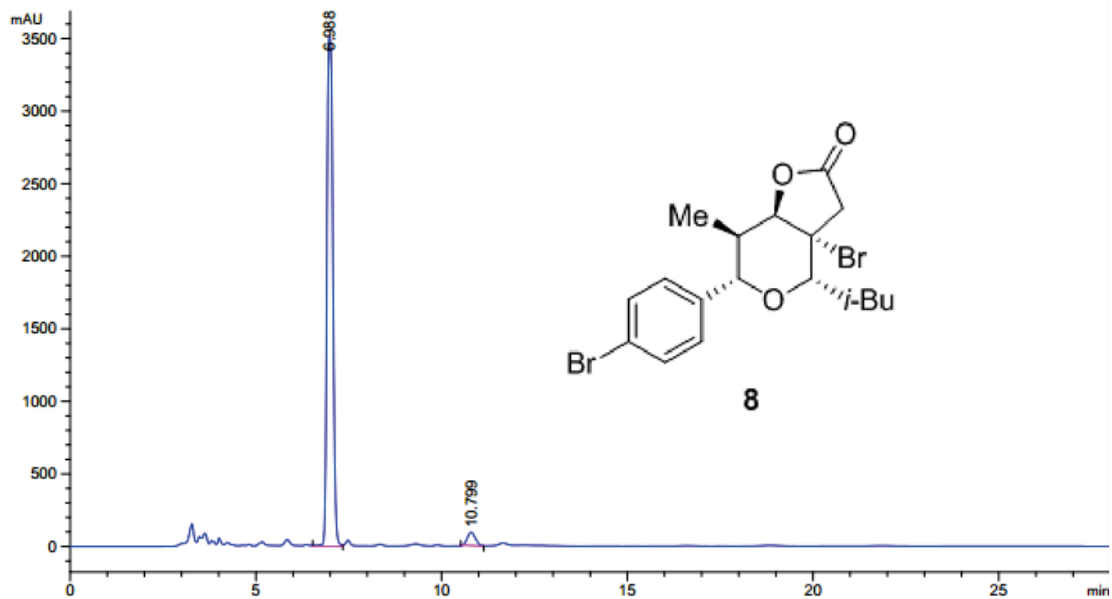

| Peak # | RetTime [min] | Type | Width [min] | Area mAU   | Area %  |
|--------|---------------|------|-------------|------------|---------|
| 1      | 6.988         | VV   | 0.1753      | 3.87657e4  | 96.6169 |
| 2      | 10.799        | MM   | 0.2493      | 1357.40552 | 3.3831  |

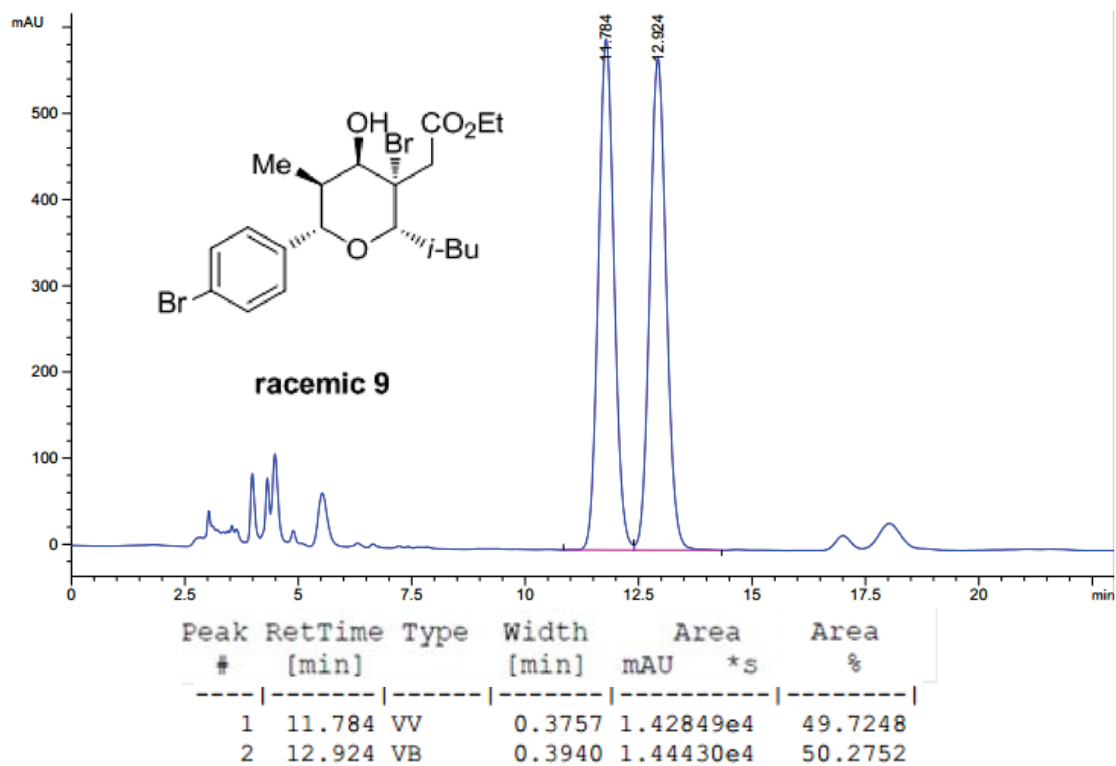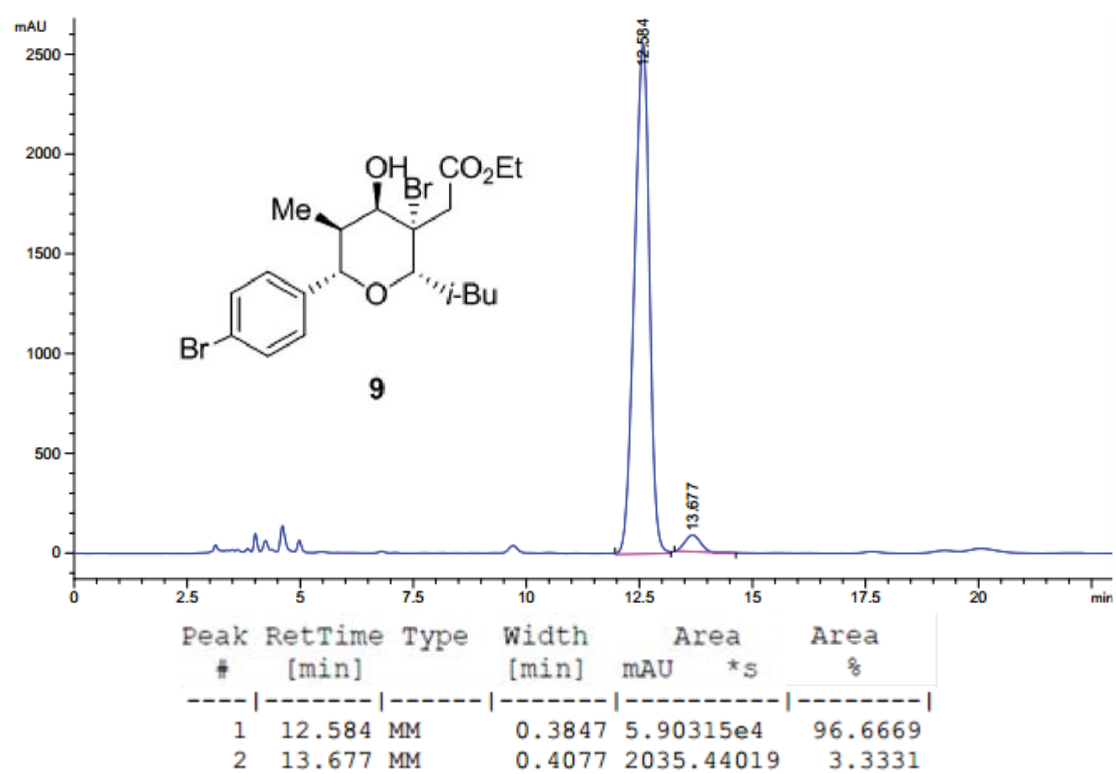

Supplement: c7cc00632b1.pdf [file c7cc00632b1.pdf]
